# Supplementary material for: Liquid-templated graphene aerogel electromagnetic traps
Source: Royal Society of Chemistry journal article supplement (doi:10.1039/d3nr06478f), 2024-01-01
Supplement: d3nr06478f1.xlsx [file d3nr06478f1.xlsx]

## Sheet: Figure 1
	Part (e)						Part (f)	Time	Displacement	Force	Compressive strain (Displacement)	Compressive stress	Compressive displacement
			GO	rGO	GO:CNF	rGO:CNF		(s)	(mm)	(N)	(%)	(kPa)	(mm)
		Density (mg/cm3)	5.96474	3.11557	5.3906	3.40078		0	0	0.0211	0	0.0299	0
		Error	0.293607	0.313285	0.211529	0.394705		0.02	0	0.0241	0.0002	0.0342	0
								0.04	0.0002	0.0222	0.0021	0.0314	0.0002
								0.06	0.0005	0.02	0.0056	0.0283	0.0005
								0.08	0.0009	0.0175	0.0105	0.0247	0.0009
								0.1	0.0014	0.0179	0.0164	0.0253	0.0014
								0.12	0.0022	0.0228	0.0255	0.0322	0.0022
								0.14	0.0033	0.0224	0.0378	0.0316	0.0033
								0.16	0.0047	0.0253	0.0541	0.0357	0.0047
								0.18	0.0066	0.0246	0.0767	0.0349	0.0066
								0.2	0.0094	0.0218	0.1086	0.0309	0.0094
								0.22	0.0127	0.0192	0.1464	0.0271	0.0127
								0.24	0.0159	0.0194	0.1837	0.0274	0.0159
								0.26	0.0191	0.0253	0.2201	0.0357	0.019
								0.28	0.0223	0.0264	0.2578	0.0373	0.0223
								0.3	0.0258	0.0259	0.2979	0.0366	0.0258
								0.32	0.0294	0.0233	0.3401	0.033	0.0294
								0.34	0.0332	0.02	0.3833	0.0283	0.0332
								0.36	0.0368	0.02	0.4258	0.0283	0.0368
								0.38	0.0403	0.022	0.4657	0.0311	0.0403
								0.4	0.0436	0.024	0.5041	0.034	0.0436
								0.42	0.047	0.0268	0.5433	0.038	0.047
								0.44	0.0505	0.0265	0.5838	0.0375	0.0505
								0.46	0.0539	0.0252	0.6235	0.0357	0.0539
								0.48	0.057	0.0234	0.659	0.0331	0.057
								0.5	0.0597	0.0268	0.6896	0.038	0.0596
								0.52	0.0622	0.0275	0.7186	0.0389	0.0622
								0.54	0.0648	0.0271	0.749	0.0383	0.0648
								0.56	0.0677	0.0275	0.7821	0.0389	0.0677
								0.58	0.0707	0.0264	0.8174	0.0374	0.0707
								0.6	0.0739	0.0272	0.8545	0.0385	0.0739
								0.62	0.0774	0.0275	0.8943	0.0389	0.0774
								0.64	0.081	0.0242	0.9365	0.0343	0.081
								0.66	0.0848	0.0267	0.9799	0.0378	0.0848
								0.68	0.0885	0.0264	1.0232	0.0374	0.0885
								0.7	0.0921	0.0278	1.065	0.0394	0.0921
								0.72	0.0957	0.03	1.1058	0.0424	0.0956
								0.74	0.0993	0.0283	1.1473	0.04	0.0992
								0.76	0.103	0.0286	1.19	0.0405	0.1029
								0.78	0.1066	0.0242	1.2321	0.0342	0.1066
								0.8	0.1099	0.0243	1.27	0.0344	0.1099
								0.82	0.1128	0.0272	1.3035	0.0384	0.1128
								0.84	0.1156	0.0298	1.3363	0.0422	0.1156
								0.86	0.1186	0.0316	1.3707	0.0447	0.1186
								0.88	0.1217	0.0294	1.407	0.0416	0.1217
								0.9	0.125	0.0315	1.4447	0.0446	0.125
								0.92	0.1284	0.0301	1.4845	0.0426	0.1284
								0.94	0.1321	0.0284	1.5265	0.0401	0.132
								0.96	0.1358	0.0296	1.5703	0.0419	0.1358
								0.98	0.1397	0.0285	1.6147	0.0403	0.1397
								1	0.1434	0.0295	1.6571	0.0417	0.1433
								1.02	0.1468	0.0311	1.6971	0.0441	0.1468
								1.04	0.1503	0.0321	1.7369	0.0455	0.1502
								1.06	0.1538	0.0325	1.778	0.046	0.1538
								1.08	0.1574	0.0295	1.819	0.0417	0.1573
								1.1	0.1606	0.0299	1.8563	0.0423	0.1606
								1.12	0.1634	0.0307	1.8887	0.0434	0.1634
								1.14	0.166	0.0308	1.9188	0.0436	0.166
								1.16	0.1687	0.0326	1.95	0.0462	0.1687
								1.18	0.1716	0.0307	1.9838	0.0434	0.1716
								1.2	0.1747	0.0303	2.0196	0.0428	0.1747
								1.22	0.1779	0.0286	2.057	0.0405	0.1779
								1.24	0.1814	0.03	2.0968	0.0424	0.1814
								1.26	0.1851	0.0319	2.1392	0.0452	0.185
								1.28	0.1889	0.0316	2.1836	0.0447	0.1889
								1.3	0.1927	0.0331	2.2279	0.0468	0.1927
								1.32	0.1963	0.03	2.2697	0.0425	0.1963
								1.34	0.1998	0.0293	2.3098	0.0415	0.1998
								1.36	0.2033	0.0322	2.3504	0.0456	0.2033
								1.38	0.207	0.0306	2.3924	0.0433	0.2069
								1.4	0.2105	0.0327	2.4334	0.0463	0.2105
								1.42	0.2137	0.032	2.47	0.0453	0.2137
								1.44	0.2164	0.0328	2.5019	0.0464	0.2164
								1.46	0.2191	0.0339	2.5325	0.048	0.2191
								1.48	0.2219	0.0323	2.565	0.0457	0.2219
								1.5	0.2249	0.0341	2.6001	0.0482	0.2249
								1.52	0.2281	0.0333	2.6374	0.0472	0.2281
								1.54	0.2316	0.0353	2.6768	0.0499	0.2315
								1.56	0.2352	0.0342	2.7186	0.0484	0.2352
								1.58	0.2389	0.0343	2.7622	0.0485	0.2389
								1.6	0.2428	0.0338	2.8066	0.0478	0.2428
								1.62	0.2465	0.032	2.8496	0.0452	0.2465
								1.64	0.25	0.033	2.8897	0.0467	0.25
								1.66	0.2533	0.0342	2.9287	0.0483	0.2533
								1.68	0.2568	0.0332	2.9692	0.0469	0.2568
								1.7	0.2604	0.0348	3.0106	0.0492	0.2604
								1.72	0.2638	0.0325	3.0496	0.046	0.2638
								1.74	0.2668	0.0334	3.0838	0.0473	0.2668
								1.76	0.2694	0.0348	3.1146	0.0492	0.2694
								1.78	0.2721	0.0341	3.1456	0.0482	0.2721
								1.8	0.275	0.036	3.1792	0.0509	0.275
								1.82	0.2781	0.0349	3.2153	0.0493	0.2781
								1.84	0.2815	0.0352	3.2536	0.0499	0.2814
								1.86	0.285	0.0357	3.2948	0.0506	0.285
								1.88	0.2888	0.0344	3.338	0.0487	0.2887
								1.9	0.2926	0.036	3.3822	0.0509	0.2926
								1.92	0.2964	0.0344	3.4265	0.0487	0.2964
								1.94	0.3001	0.0359	3.4694	0.0507	0.3001
								1.96	0.3037	0.035	3.5103	0.0495	0.3036
								1.98	0.3072	0.0357	3.5509	0.0505	0.3072
								2	0.3108	0.0371	3.5928	0.0525	0.3108
								2.02	0.3144	0.0342	3.6345	0.0484	0.3144
								2.04	0.3177	0.0365	3.6722	0.0516	0.3176
								2.06	0.3205	0.0359	3.7052	0.0509	0.3205
								2.08	0.3232	0.0361	3.7365	0.051	0.3232
								2.1	0.3261	0.0369	3.7693	0.0522	0.326
								2.12	0.3291	0.0363	3.804	0.0513	0.329
								2.14	0.3322	0.0382	3.8398	0.054	0.3321
								2.16	0.3354	0.0383	3.877	0.0542	0.3354
								2.18	0.3388	0.0374	3.9162	0.0529	0.3387
								2.2	0.3423	0.0377	3.9572	0.0533	0.3423
								2.22	0.3459	0.0352	3.9989	0.0498	0.3459
								2.24	0.3495	0.0373	4.0399	0.0528	0.3494
								2.26	0.3528	0.0374	4.0788	0.0529	0.3528
								2.28	0.3562	0.0379	4.1172	0.0537	0.3561
								2.3	0.3596	0.039	4.1572	0.0552	0.3596
								2.32	0.3632	0.0374	4.199	0.053	0.3632
								2.34	0.3668	0.0371	4.24	0.0525	0.3668
								2.36	0.3699	0.0354	4.2762	0.05	0.3699
								2.38	0.3726	0.0365	4.3077	0.0517	0.3726
								2.4	0.3752	0.0383	4.3379	0.0542	0.3752
								2.42	0.378	0.0379	4.3702	0.0536	0.378
								2.44	0.3811	0.0397	4.4053	0.0562	0.3811
								2.46	0.3843	0.0376	4.4424	0.0532	0.3843
								2.48	0.3877	0.0395	4.4815	0.0559	0.3876
								2.5	0.3913	0.0395	4.5234	0.0558	0.3913
								2.52	0.3951	0.0393	4.5679	0.0557	0.3951
								2.54	0.3991	0.042	4.6136	0.0594	0.3991
								2.56	0.4029	0.041	4.658	0.058	0.4029
								2.58	0.4066	0.0426	4.7	0.0602	0.4066
								2.6	0.4101	0.0406	4.7413	0.0574	0.4101
								2.62	0.4137	0.0387	4.7828	0.0547	0.4137
								2.64	0.4173	0.0387	4.8239	0.0547	0.4173
								2.66	0.4206	0.0389	4.8622	0.0551	0.4206
								2.68	0.4235	0.0413	4.896	0.0585	0.4235
								2.7	0.4262	0.0426	4.9271	0.0603	0.4262
								2.72	0.4289	0.0415	4.9585	0.0587	0.4289
								2.74	0.4319	0.0427	4.9924	0.0603	0.4318
								2.76	0.435	0.0421	5.0291	0.0596	0.435
								2.78	0.4384	0.0434	5.0679	0.0615	0.4384
								2.8	0.442	0.0426	5.1091	0.0603	0.4419
								2.82	0.4457	0.0417	5.1527	0.059	0.4457
								2.84	0.4496	0.0428	5.1975	0.0606	0.4496
								2.86	0.4534	0.0404	5.2411	0.0571	0.4534
								2.88	0.4568	0.0412	5.2811	0.0583	0.4568
								2.9	0.4601	0.0413	5.3186	0.0584	0.4601
								2.92	0.4634	0.0431	5.3566	0.061	0.4633
								2.94	0.4669	0.0436	5.397	0.0617	0.4668
								2.96	0.4704	0.0393	5.438	0.0556	0.4704
								2.98	0.4736	0.0419	5.4755	0.0593	0.4736
								3	0.4765	0.0413	5.5081	0.0584	0.4764
								3.02	0.4791	0.0427	5.5388	0.0604	0.4791
								3.04	0.4819	0.0438	5.5712	0.0619	0.4819
								3.06	0.4849	0.0427	5.6056	0.0604	0.4849
								3.08	0.488	0.0438	5.6417	0.062	0.488
								3.1	0.4913	0.044	5.6797	0.0622	0.4913
								3.12	0.4948	0.0428	5.7199	0.0606	0.4948
								3.14	0.4984	0.0444	5.7616	0.0629	0.4984
								3.16	0.5021	0.0435	5.804	0.0615	0.502
								3.18	0.5058	0.0451	5.8467	0.0639	0.5057
								3.2	0.5094	0.0441	5.8886	0.0624	0.5094
								3.22	0.513	0.0453	5.9306	0.0641	0.513
								3.24	0.5168	0.0458	5.974	0.0649	0.5168
								3.26	0.5206	0.0432	6.0188	0.0611	0.5206
								3.28	0.5243	0.0437	6.061	0.0619	0.5243
								3.3	0.5274	0.0442	6.0972	0.0625	0.5274
								3.32	0.5302	0.0455	6.129	0.0643	0.5302
								3.34	0.5329	0.0459	6.1603	0.065	0.5329
								3.36	0.5357	0.0443	6.1935	0.0627	0.5357
								3.38	0.5387	0.0457	6.2281	0.0647	0.5387
								3.4	0.5418	0.0455	6.2636	0.0643	0.5418
								3.42	0.545	0.0467	6.3009	0.0661	0.545
								3.44	0.5485	0.047	6.3411	0.0664	0.5485
								3.46	0.5522	0.0436	6.3834	0.0617	0.5522
								3.48	0.5559	0.0466	6.4266	0.0659	0.5559
								3.5	0.5595	0.0458	6.4679	0.0648	0.5595
								3.52	0.5629	0.0471	6.507	0.0667	0.5629
								3.54	0.5663	0.0471	6.5464	0.0666	0.5663
								3.56	0.5698	0.0468	6.5877	0.0663	0.5698
								3.58	0.5735	0.0462	6.6297	0.0654	0.5735
								3.6	0.5769	0.045	6.6694	0.0637	0.5769
								3.62	0.5799	0.0461	6.7036	0.0652	0.5799
								3.64	0.5825	0.0483	6.7344	0.0683	0.5825
								3.66	0.5852	0.0487	6.7657	0.0689	0.5852
								3.68	0.5882	0.049	6.7996	0.0693	0.5882
								3.7	0.5913	0.0538	6.836	0.0761	0.5913
								3.72	0.5947	0.0472	6.8747	0.0668	0.5947
								3.74	0.5983	0.0542	6.9163	0.0766	0.5983
								3.76	0.6021	0.0451	6.9608	0.0638	0.6021
								3.78	0.6061	0.0512	7.0068	0.0724	0.6061
								3.8	0.6101	0.0485	7.0531	0.0686	0.6101
								3.82	0.6139	0.0496	7.0974	0.0701	0.6139
								3.84	0.6176	0.0484	7.1397	0.0685	0.6176
								3.86	0.6212	0.0487	7.1811	0.0689	0.6212
								3.88	0.6247	0.0495	7.2219	0.07	0.6247
								3.9	0.628	0.0472	7.26	0.0668	0.628
								3.92	0.6309	0.0515	7.2933	0.0729	0.6309
								3.94	0.6335	0.049	7.3232	0.0693	0.6335
								3.96	0.6361	0.052	7.3531	0.0736	0.636
								3.98	0.6389	0.0505	7.3856	0.0715	0.6389
								4	0.6419	0.0507	7.421	0.0718	0.6419
								4.02	0.6452	0.0493	7.4583	0.0697	0.6451
								4.04	0.6485	0.0522	7.4975	0.0739	0.6485
								4.06	0.6521	0.0508	7.5389	0.0718	0.6521
								4.08	0.6558	0.0519	7.5817	0.0734	0.6558
								4.1	0.6595	0.0531	7.6242	0.0751	0.6595
								4.12	0.663	0.0499	7.6643	0.0706	0.663
								4.14	0.6662	0.0521	7.7017	0.0738	0.6662
								4.16	0.6694	0.0514	7.7386	0.0728	0.6694
								4.18	0.6727	0.0546	7.777	0.0772	0.6727
								4.2	0.6762	0.0533	7.8176	0.0755	0.6762
								4.22	0.6797	0.0539	7.8582	0.0762	0.6797
								4.24	0.6829	0.0505	7.895	0.0715	0.6829
								4.26	0.6857	0.0507	7.9276	0.0717	0.6857
								4.28	0.6885	0.053	7.9592	0.075	0.6885
								4.3	0.6914	0.0533	7.9933	0.0754	0.6914
								4.32	0.6946	0.0549	8.0302	0.0777	0.6946
								4.34	0.698	0.0543	8.0688	0.0768	0.6979
								4.36	0.7015	0.0544	8.1094	0.077	0.7015
								4.38	0.7052	0.0531	8.152	0.0752	0.7051
								4.4	0.7089	0.0531	8.1955	0.0752	0.7089
								4.42	0.7127	0.0528	8.2388	0.0747	0.7127
								4.44	0.7163	0.0538	8.2807	0.0762	0.7163
								4.46	0.7198	0.0546	8.3218	0.0773	0.7198
								4.48	0.7234	0.0562	8.3633	0.0795	0.7234
								4.5	0.7271	0.0543	8.406	0.0769	0.7271
								4.52	0.7308	0.0539	8.4486	0.0763	0.7308
								4.54	0.7342	0.0532	8.4876	0.0752	0.7342
								4.56	0.7371	0.0551	8.5216	0.0779	0.7371
								4.58	0.7398	0.0558	8.553	0.079	0.7398
								4.6	0.7427	0.0559	8.5855	0.0791	0.7426
								4.62	0.7457	0.0561	8.6201	0.0794	0.7456
								4.64	0.7487	0.0571	8.6556	0.0808	0.7487
								4.66	0.7519	0.0557	8.6924	0.0788	0.7519
								4.68	0.7553	0.0552	8.7313	0.0781	0.7553
								4.7	0.7588	0.0556	8.7721	0.0786	0.7588
								4.72	0.7625	0.0579	8.8147	0.0819	0.7625
								4.74	0.7662	0.0559	8.8573	0.0791	0.7662
								4.76	0.7697	0.0576	8.8979	0.0815	0.7697
								4.78	0.7731	0.0603	8.9372	0.0853	0.7731
								4.8	0.7765	0.0599	8.9769	0.0848	0.7765
								4.82	0.7801	0.059	9.0184	0.0835	0.7801
								4.84	0.7836	0.0576	9.0591	0.0816	0.7836
								4.86	0.7868	0.0583	9.0955	0.0825	0.7868
								4.88	0.7896	0.0589	9.1277	0.0833	0.7895
								4.9	0.7922	0.0602	9.1586	0.0851	0.7922
								4.92	0.7951	0.0611	9.1913	0.0865	0.795
								4.94	0.7981	0.0586	9.2263	0.0829	0.7981
								4.96	0.8013	0.0595	9.2631	0.0841	0.8013
								4.98	0.8047	0.0618	9.3022	0.0874	0.8046
								5	0.8083	0.0591	9.3443	0.0837	0.8083
								5.02	0.8122	0.0614	9.3891	0.0869	0.8122
								5.04	0.8162	0.0605	9.4353	0.0855	0.8161
								5.06	0.8201	0.0602	9.4803	0.0852	0.82
								5.08	0.8237	0.0604	9.5229	0.0854	0.8237
								5.1	0.8273	0.06	9.5641	0.0849	0.8273
								5.12	0.8309	0.0627	9.6053	0.0888	0.8309
								5.14	0.8343	0.0587	9.6454	0.0831	0.8343
								5.16	0.8375	0.0604	9.682	0.0855	0.8375
								5.18	0.8403	0.0614	9.7138	0.0869	0.8402
								5.2	0.8428	0.0614	9.7435	0.0869	0.8428
								5.22	0.8455	0.0633	9.7742	0.0895	0.8455
								5.24	0.8484	0.062	9.8078	0.0877	0.8484
								5.26	0.8515	0.0618	9.844	0.0874	0.8515
								5.28	0.8548	0.0603	9.8824	0.0852	0.8548
								5.3	0.8584	0.0617	9.9231	0.0873	0.8583
								5.32	0.862	0.0623	9.9656	0.0881	0.862
								5.34	0.8658	0.0617	10.0089	0.0872	0.8658
								5.36	0.8695	0.0634	10.0517	0.0897	0.8695
								5.38	0.8729	0.0645	10.0916	0.0913	0.8729
								5.4	0.8762	0.0625	10.1292	0.0884	0.8762
								5.42	0.8794	0.0646	10.1669	0.0914	0.8794
								5.44	0.8829	0.0619	10.2064	0.0875	0.8829
								5.46	0.8864	0.0629	10.2473	0.089	0.8864
								5.48	0.8898	0.0611	10.2868	0.0864	0.8898
								5.5	0.8929	0.0616	10.3221	0.0872	0.8929
								5.52	0.8957	0.0641	10.3547	0.0906	0.8957
								5.54	0.8986	0.0648	10.388	0.0916	0.8986
								5.56	0.9017	0.0666	10.4237	0.0942	0.9016
								5.58	0.905	0.0656	10.4617	0.0927	0.9049
								5.6	0.9085	0.065	10.5022	0.0919	0.9084
								5.62	0.9122	0.0662	10.5452	0.0936	0.9122
								5.64	0.916	0.0664	10.5896	0.094	0.916
								5.66	0.9199	0.067	10.6346	0.0948	0.9199
								5.68	0.9237	0.0669	10.6784	0.0946	0.9237
								5.7	0.9273	0.0657	10.7201	0.093	0.9273
								5.72	0.9309	0.0678	10.7612	0.0959	0.9308
								5.74	0.9345	0.0643	10.8029	0.091	0.9344
								5.76	0.9381	0.0662	10.8444	0.0937	0.938
								5.78	0.9414	0.0649	10.8828	0.0918	0.9414
								5.8	0.9443	0.0676	10.9162	0.0957	0.9443
								5.82	0.9469	0.0689	10.9467	0.0975	0.9469
								5.84	0.9496	0.0682	10.9775	0.0965	0.9496
								5.86	0.9524	0.0678	11.0101	0.0959	0.9524
								5.88	0.9553	0.0664	11.0439	0.094	0.9553
								5.9	0.9583	0.0673	11.0787	0.0952	0.9583
								5.92	0.9615	0.0694	11.1156	0.0981	0.9615
								5.94	0.965	0.0686	11.1555	0.0971	0.9649
								5.96	0.9686	0.0687	11.1975	0.0972	0.9686
								5.98	0.9723	0.0663	11.24	0.0938	0.9723
								6	0.9758	0.0664	11.2811	0.094	0.9758
								6.02	0.9792	0.0687	11.3204	0.0972	0.9792
								6.04	0.9826	0.0685	11.3598	0.0969	0.9826
								6.06	0.9862	0.0713	11.4009	0.1009	0.9862
								6.08	0.9899	0.0702	11.4433	0.0993	0.9898
								6.1	0.9933	0.0721	11.4835	0.102	0.9933
								6.12	0.9963	0.0705	11.5182	0.0997	0.9963
								6.14	0.999	0.0711	11.5493	0.1005	0.999
								6.16	1.0017	0.073	11.5807	0.1033	1.0017
								6.18	1.0047	0.0721	11.615	0.102	1.0047
								6.2	1.0079	0.0725	11.6518	0.1025	1.0079
								6.22	1.0112	0.072	11.6905	0.1019	1.0112
								6.24	1.0148	0.072	11.7318	0.1019	1.0148
								6.26	1.0187	0.0736	11.7764	0.1041	1.0187
								6.28	1.0227	0.0719	11.8232	0.1018	1.0227
								6.3	1.0267	0.0729	11.8693	0.1031	1.0267
								6.32	1.0304	0.073	11.9121	0.1033	1.0304
								6.34	1.0339	0.0729	11.9526	0.1031	1.0339
								6.36	1.0374	0.0751	11.9929	0.1063	1.0374
								6.38	1.0409	0.0748	12.0337	0.1058	1.0409
								6.4	1.0443	0.0753	12.0726	0.1065	1.0443
								6.42	1.0473	0.075	12.1069	0.1061	1.0472
								6.44	1.0499	0.0733	12.1376	0.1037	1.0499
								6.46	1.0525	0.0755	12.1676	0.1068	1.0525
								6.48	1.0553	0.0739	12.1996	0.1046	1.0553
								6.5	1.0583	0.0753	12.2346	0.1065	1.0583
								6.52	1.0615	0.0738	12.2715	0.1045	1.0615
								6.54	1.0648	0.0761	12.31	0.1076	1.0648
								6.56	1.0683	0.0771	12.3505	0.109	1.0683
								6.58	1.072	0.0756	12.3928	0.107	1.072
								6.6	1.0758	0.0754	12.4364	0.1066	1.0757
								6.62	1.0795	0.0749	12.4795	0.1059	1.0795
								6.64	1.083	0.0754	12.5203	0.1067	1.083
								6.66	1.0864	0.0777	12.5594	0.1099	1.0864
								6.68	1.0899	0.0765	12.5993	0.1082	1.0898
								6.7	1.0934	0.0775	12.6406	0.1097	1.0934
								6.72	1.0969	0.0773	12.6804	0.1093	1.0969
								6.74	1.0999	0.0774	12.7158	0.1095	1.0999
								6.76	1.1027	0.0784	12.748	0.111	1.1027
								6.78	1.1055	0.0756	12.7798	0.107	1.1055
								6.8	1.1084	0.0779	12.8139	0.1102	1.1084
								6.82	1.1116	0.0776	12.8505	0.1098	1.1116
								6.84	1.1149	0.08	12.8892	0.1132	1.1149
								6.86	1.1185	0.0808	12.9303	0.1143	1.1185
								6.88	1.1222	0.0793	12.9733	0.1123	1.1222
								6.9	1.126	0.079	13.0167	0.1117	1.1259
								6.92	1.1297	0.0786	13.0594	0.1111	1.1296
								6.94	1.1332	0.0793	13.1006	0.1122	1.1332
								6.96	1.1367	0.0815	13.1408	0.1153	1.1367
								6.98	1.1402	0.0805	13.1818	0.1138	1.1402
								7	1.1439	0.081	13.2242	0.1146	1.1439
								7.02	1.1475	0.0784	13.2657	0.1109	1.1475
								7.04	1.1507	0.0797	13.3028	0.1127	1.1507
								7.06	1.1535	0.0813	13.3352	0.1151	1.1535
								7.08	1.1561	0.0819	13.3657	0.1158	1.1561
								7.1	1.1589	0.0833	13.397	0.1179	1.1588
								7.12	1.1617	0.0799	13.4305	0.1131	1.1617
								7.14	1.1648	0.0822	13.4656	0.1163	1.1648
								7.16	1.168	0.0829	13.5028	0.1172	1.168
								7.18	1.1714	0.0812	13.5426	0.1149	1.1714
								7.2	1.1751	0.0835	13.5846	0.1182	1.1751
								7.22	1.1788	0.0834	13.6279	0.118	1.1788
								7.24	1.1825	0.0841	13.6708	0.1189	1.1825
								7.26	1.186	0.0828	13.7113	0.1172	1.186
								7.28	1.1894	0.0838	13.7506	0.1185	1.1894
								7.3	1.1929	0.0856	13.7911	0.1212	1.1929
								7.32	1.1965	0.083	13.8322	0.1174	1.1965
								7.34	1.2	0.0855	13.8722	0.1209	1.1999
								7.36	1.2032	0.0839	13.9094	0.1187	1.2032
								7.38	1.2061	0.0825	13.9427	0.1167	1.206
								7.4	1.2088	0.0846	13.9746	0.1197	1.2088
								7.42	1.2117	0.084	14.0082	0.1189	1.2117
								7.44	1.2148	0.0872	14.0441	0.1234	1.2148
								7.46	1.2181	0.0858	14.0821	0.1215	1.2181
								7.48	1.2216	0.0873	14.1229	0.1235	1.2216
								7.5	1.2255	0.0885	14.1671	0.1252	1.2255
								7.52	1.2295	0.0869	14.2134	0.123	1.2295
								7.54	1.2335	0.0881	14.2601	0.1246	1.2335
								7.56	1.2374	0.0853	14.3046	0.1207	1.2373
								7.58	1.241	0.0853	14.3461	0.1207	1.2409
								7.6	1.2444	0.0881	14.3864	0.1246	1.2444
								7.62	1.2479	0.0876	14.4266	0.1239	1.2479
								7.64	1.2513	0.0872	14.4659	0.1234	1.2513
								7.66	1.2544	0.0884	14.5017	0.1251	1.2544
								7.68	1.2571	0.0895	14.5331	0.1266	1.2571
								7.7	1.2597	0.0914	14.5625	0.1292	1.2597
								7.72	1.2623	0.0906	14.5933	0.1282	1.2623
								7.74	1.2653	0.0922	14.6271	0.1304	1.2652
								7.76	1.2683	0.0903	14.6628	0.1277	1.2683
								7.78	1.2715	0.0918	14.6997	0.1298	1.2715
								7.8	1.2749	0.0924	14.7384	0.1307	1.2749
								7.82	1.2784	0.0894	14.7793	0.1265	1.2784
								7.84	1.2821	0.0911	14.8217	0.1289	1.2821
								7.86	1.2858	0.0904	14.8642	0.1278	1.2858
								7.88	1.2893	0.0913	14.905	0.1292	1.2893
								7.9	1.2926	0.0921	14.9437	0.1303	1.2926
								7.92	1.296	0.0916	14.9825	0.1295	1.296
								7.94	1.2995	0.0916	15.0233	0.1296	1.2995
								7.96	1.3032	0.0909	15.0655	0.1285	1.3032
								7.98	1.3066	0.0929	15.1055	0.1314	1.3066
								8	1.3096	0.0946	15.1399	0.1339	1.3096
								8.02	1.3123	0.093	15.1713	0.1315	1.3123
								8.04	1.3151	0.0933	15.2038	0.132	1.3151
								8.06	1.3182	0.0918	15.2392	0.1299	1.3182
								8.08	1.3215	0.094	15.2768	0.1329	1.3214
								8.1	1.3249	0.0929	15.3164	0.1315	1.3249
								8.12	1.3286	0.094	15.359	0.133	1.3285
								8.14	1.3324	0.0972	15.4037	0.1375	1.3324
								8.16	1.3364	0.0937	15.4493	0.1325	1.3364
								8.18	1.3401	0.0959	15.4929	0.1357	1.3401
								8.2	1.3436	0.0967	15.5333	0.1368	1.3436
								8.22	1.347	0.0963	15.5721	0.1362	1.347
								8.24	1.3504	0.0976	15.6118	0.1381	1.3504
								8.26	1.354	0.0955	15.6527	0.135	1.354
								8.28	1.3574	0.095	15.6919	0.1345	1.3573
								8.3	1.3604	0.0964	15.7266	0.1363	1.3604
								8.32	1.3631	0.0987	15.7579	0.1396	1.3631
								8.34	1.3658	0.0991	15.7889	0.1402	1.3657
								8.36	1.3686	0.0974	15.8223	0.1378	1.3686
								8.38	1.3717	0.0976	15.8579	0.1381	1.3717
								8.4	1.3749	0.0983	15.895	0.139	1.3749
								8.42	1.3783	0.0991	15.9338	0.1402	1.3783
								8.44	1.3818	0.1008	15.9747	0.1426	1.3818
								8.46	1.3855	0.0996	16.0173	0.1408	1.3855
								8.48	1.3893	0.099	16.0606	0.1401	1.3892
								8.5	1.3929	0.0979	16.1026	0.1385	1.3929
								8.52	1.3963	0.0985	16.1425	0.1394	1.3963
								8.54	1.3998	0.0998	16.1823	0.1412	1.3998
								8.56	1.4034	0.1007	16.2236	0.1425	1.4033
								8.58	1.407	0.1002	16.2658	0.1418	1.407
								8.6	1.4104	0.0994	16.3054	0.1407	1.4104
								8.62	1.4134	0.0999	16.34	0.1413	1.4134
								8.64	1.4162	0.1014	16.3717	0.1435	1.4162
								8.66	1.4189	0.1026	16.4039	0.1452	1.4189
								8.68	1.4219	0.103	16.4382	0.1457	1.4219
								8.7	1.4251	0.104	16.4745	0.1472	1.425
								8.72	1.4284	0.1046	16.5126	0.148	1.4283
								8.74	1.4319	0.1052	16.5533	0.1488	1.4319
								8.76	1.4356	0.104	16.5964	0.1471	1.4356
								8.78	1.4395	0.1054	16.6413	0.1492	1.4395
								8.8	1.4433	0.1029	16.6857	0.1455	1.4433
								8.82	1.4469	0.105	16.7274	0.1485	1.4469
								8.84	1.4504	0.1069	16.7672	0.1512	1.4504
								8.86	1.4538	0.1063	16.8072	0.1503	1.4538
								8.88	1.4573	0.1043	16.8478	0.1476	1.4573
								8.9	1.4607	0.1025	16.8868	0.145	1.4607
								8.92	1.4637	0.1047	16.9216	0.1481	1.4637
								8.94	1.4664	0.1063	16.9525	0.1504	1.4664
								8.96	1.469	0.1056	16.9823	0.1495	1.469
								8.98	1.4717	0.1076	17.0136	0.1522	1.4717
								9	1.4746	0.1073	17.0475	0.1517	1.4746
								9.02	1.4778	0.1089	17.0839	0.1541	1.4777
								9.04	1.4811	0.109	17.1226	0.1541	1.4811
								9.06	1.4847	0.108	17.1639	0.1527	1.4847
								9.08	1.4885	0.1107	17.2074	0.1566	1.4884
								9.1	1.4923	0.1073	17.2516	0.1518	1.4923
								9.12	1.496	0.1082	17.2942	0.1531	1.4959
								9.14	1.4994	0.1093	17.3342	0.1547	1.4994
								9.16	1.5028	0.1089	17.3734	0.154	1.5028
								9.18	1.5064	0.1093	17.4144	0.1546	1.5063
								9.2	1.51	0.1076	17.4568	0.1522	1.51
								9.22	1.5136	0.1085	17.4976	0.1536	1.5135
								9.24	1.5167	0.1104	17.534	0.1562	1.5167
								9.26	1.5195	0.1102	17.5667	0.156	1.5195
								9.28	1.5223	0.1131	17.5992	0.16	1.5223
								9.3	1.5253	0.1128	17.6339	0.1596	1.5253
								9.32	1.5286	0.1134	17.6713	0.1604	1.5286
								9.34	1.532	0.1129	17.711	0.1598	1.532
								9.36	1.5357	0.1118	17.7531	0.1582	1.5356
								9.38	1.5394	0.1128	17.7965	0.1596	1.5394
								9.4	1.5432	0.1138	17.8405	0.161	1.5432
								9.42	1.547	0.1142	17.8844	0.1616	1.547
								9.44	1.5506	0.1144	17.9259	0.1618	1.5506
								9.46	1.554	0.1151	17.9654	0.1628	1.554
								9.48	1.5574	0.1167	18.0047	0.1651	1.5574
								9.5	1.5609	0.115	18.0453	0.1627	1.5609
								9.52	1.5644	0.1147	18.0855	0.1622	1.5644
								9.54	1.5675	0.1132	18.1218	0.1602	1.5675
								9.56	1.5703	0.1143	18.1535	0.1617	1.5703
								9.58	1.5729	0.1157	18.1833	0.1637	1.5728
								9.6	1.5756	0.1152	18.2146	0.1629	1.5756
								9.62	1.5785	0.1164	18.2481	0.1646	1.5785
								9.64	1.5815	0.1176	18.283	0.1663	1.5815
								9.66	1.5846	0.1178	18.3189	0.1667	1.5846
								9.68	1.5879	0.1194	18.357	0.1689	1.5879
								9.7	1.5914	0.1177	18.3974	0.1665	1.5914
								9.72	1.5951	0.1181	18.4399	0.1671	1.595
								9.74	1.5988	0.1191	18.4834	0.1685	1.5988
								9.76	1.6025	0.1192	18.526	0.1687	1.6025
								9.78	1.6061	0.1199	18.5674	0.1697	1.6061
								9.8	1.6097	0.1203	18.6094	0.1703	1.6097
								9.82	1.6135	0.1213	18.6526	0.1717	1.6134
								9.84	1.6171	0.1195	18.695	0.1691	1.6171
								9.86	1.6204	0.1188	18.7323	0.1681	1.6203
								9.88	1.6231	0.1207	18.7641	0.1708	1.6231
								9.9	1.6257	0.1224	18.7941	0.1732	1.6257
								9.92	1.6285	0.1217	18.826	0.1722	1.6284
								9.94	1.6315	0.1214	18.861	0.1718	1.6315
								9.96	1.6347	0.1227	18.8985	0.1735	1.6347
								9.98	1.6382	0.1248	18.9387	0.1766	1.6382
								10	1.6419	0.1247	18.9818	0.1764	1.6419
								10.02	1.6458	0.1257	19.0267	0.1778	1.6458
								10.04	1.6497	0.1228	19.0719	0.1737	1.6497
								10.06	1.6535	0.1241	19.1152	0.1756	1.6535
								10.08	1.657	0.1247	19.1562	0.1764	1.657
								10.1	1.6605	0.1236	19.1966	0.1749	1.6605
								10.12	1.6641	0.1252	19.2375	0.1771	1.664
								10.14	1.6675	0.1247	19.2771	0.1764	1.6675
								10.16	1.6706	0.1257	19.313	0.1779	1.6706
								10.18	1.6733	0.1273	19.3445	0.18	1.6733
								10.2	1.6759	0.1277	19.3739	0.1807	1.6758
								10.22	1.6785	0.1286	19.4046	0.1819	1.6785
								10.24	1.6814	0.1291	19.4384	0.1827	1.6814
								10.26	1.6846	0.1275	19.475	0.1804	1.6846
								10.28	1.6879	0.1295	19.5136	0.1832	1.6879
								10.3	1.6914	0.1282	19.554	0.1813	1.6914
								10.32	1.6951	0.1298	19.5964	0.1836	1.6951
								10.34	1.6989	0.128	19.6404	0.1811	1.6989
								10.36	1.7028	0.1288	19.6852	0.1822	1.7028
								10.38	1.7065	0.1307	19.7278	0.1848	1.7065
								10.4	1.7099	0.1316	19.7677	0.1862	1.7099
								10.42	1.7133	0.1328	19.807	0.1878	1.7133
								10.44	1.7168	0.1308	19.8476	0.1851	1.7168
								10.46	1.7204	0.1303	19.8886	0.1844	1.7204
								10.48	1.7236	0.1304	19.9264	0.1845	1.7236
								10.5	1.7265	0.1317	19.96	0.1863	1.7265
								10.52	1.7293	0.134	19.9919	0.1896	1.7293
								10.526	1.7301	0.1342	20.0016	0.1898	1.7301
								10.527	1.7303	0.1342	20.0032	0.1898	1.7303
								10.528	1.7304	0.1342	20.0049	0.1898	1.7304
								10.548	1.7333	0.1311	20.0377	0.1855	1.7333
								10.568	1.7351	0.1294	20.0587	0.1831	1.7351
								10.588	1.7355	0.1337	20.063	0.1891	1.7354
								10.608	1.7352	0.1326	20.0596	0.1875	1.7351
								10.628	1.7347	0.1329	20.054	0.188	1.7347
								10.648	1.7341	0.1349	20.0476	0.1908	1.7341
								10.668	1.7335	0.1315	20.0401	0.186	1.7335
								10.688	1.7326	0.132	20.0294	0.1868	1.7325
								10.708	1.7313	0.1293	20.0146	0.1829	1.7313
								10.728	1.7295	0.1279	19.9942	0.1809	1.7295
								10.748	1.727	0.1263	19.9649	0.1787	1.727
								10.768	1.7239	0.1269	19.9292	0.1796	1.7239
								10.788	1.7208	0.1276	19.8941	0.1805	1.7208
								10.808	1.7178	0.1245	19.8591	0.1762	1.7178
								10.828	1.7146	0.1243	19.8224	0.1758	1.7146
								10.848	1.7113	0.1208	19.7833	0.171	1.7113
								10.868	1.7077	0.1207	19.7422	0.1707	1.7077
								10.888	1.7041	0.1208	19.7003	0.171	1.7041
								10.908	1.7005	0.1181	19.6594	0.1671	1.7005
								10.928	1.697	0.1163	19.6188	0.1645	1.697
								10.948	1.6934	0.1162	19.5772	0.1644	1.6934
								10.968	1.6898	0.1154	19.5352	0.1633	1.6898
								10.988	1.6865	0.118	19.4966	0.167	1.6865
								11.008	1.6836	0.115	19.4631	0.1627	1.6835
								11.028	1.6809	0.1136	19.432	0.1606	1.6809
								11.048	1.6781	0.1126	19.4002	0.1594	1.6781
								11.068	1.6752	0.1112	19.3662	0.1573	1.6752
								11.088	1.6721	0.1118	19.3306	0.1581	1.6721
								11.108	1.6689	0.1085	19.294	0.1534	1.6689
								11.128	1.6656	0.1086	19.2559	0.1536	1.6656
								11.148	1.6622	0.1074	19.2155	0.1519	1.6621
								11.168	1.6585	0.1075	19.1733	0.1521	1.6585
								11.188	1.6548	0.1072	19.13	0.1517	1.6547
								11.208	1.651	0.1055	19.0871	0.1493	1.651
								11.228	1.6475	0.1045	19.0456	0.1479	1.6474
								11.248	1.6439	0.1039	19.0039	0.147	1.6438
								11.268	1.6401	0.1024	18.9609	0.1449	1.6401
								11.288	1.6364	0.1044	18.9178	0.1477	1.6364
								11.308	1.633	0.1018	18.8785	0.144	1.633
								11.328	1.6301	0.1024	18.8445	0.1449	1.63
								11.348	1.6273	0.0997	18.8131	0.1411	1.6273
								11.368	1.6245	0.0982	18.7807	0.1389	1.6245
								11.388	1.6215	0.0981	18.7459	0.1388	1.6215
								11.408	1.6183	0.0968	18.7089	0.137	1.6183
								11.428	1.6149	0.0974	18.6698	0.1378	1.6149
								11.448	1.6114	0.0957	18.6283	0.1354	1.6113
								11.468	1.6076	0.0954	18.5849	0.135	1.6076
								11.488	1.6038	0.0942	18.5404	0.1333	1.6037
								11.508	1.5999	0.0935	18.4963	0.1322	1.5999
								11.528	1.5963	0.0943	18.4544	0.1334	1.5963
								11.548	1.5928	0.0912	18.4141	0.129	1.5928
								11.568	1.5894	0.0915	18.3741	0.1294	1.5894
								11.588	1.586	0.0906	18.3347	0.1282	1.586
								11.608	1.5828	0.091	18.2983	0.1288	1.5828
								11.628	1.58	0.0921	18.2658	0.1303	1.58
								11.648	1.5774	0.089	18.2358	0.1259	1.5774
								11.668	1.5748	0.0894	18.2053	0.1265	1.5748
								11.688	1.5719	0.0884	18.1721	0.125	1.5719
								11.708	1.5688	0.0874	18.1365	0.1237	1.5688
								11.728	1.5656	0.0888	18.099	0.1257	1.5656
								11.748	1.5621	0.0868	18.0593	0.1227	1.5621
								11.768	1.5585	0.0878	18.0168	0.1242	1.5585
								11.788	1.5546	0.0866	17.9721	0.1225	1.5546
								11.808	1.5507	0.0846	17.9266	0.1197	1.5506
								11.828	1.5469	0.0867	17.8828	0.1227	1.5469
								11.848	1.5433	0.0832	17.8418	0.1177	1.5433
								11.868	1.5398	0.0833	17.8013	0.1178	1.5398
								11.888	1.5362	0.0833	17.7594	0.1179	1.5362
								11.908	1.5325	0.083	17.7171	0.1174	1.5325
								11.928	1.5292	0.0825	17.6783	0.1167	1.5292
								11.948	1.5263	0.0826	17.6447	0.1169	1.5263
								11.968	1.5236	0.0806	17.6135	0.1141	1.5236
								11.988	1.5208	0.0802	17.5808	0.1134	1.5207
								12.008	1.5177	0.0783	17.5455	0.1108	1.5177
								12.028	1.5145	0.0804	17.5083	0.1138	1.5145
								12.048	1.5111	0.078	17.4697	0.1104	1.5111
								12.068	1.5077	0.0798	17.4294	0.1129	1.5076
								12.088	1.504	0.0762	17.3876	0.1078	1.504
								12.108	1.5003	0.0774	17.3448	0.1095	1.5003
								12.128	1.4967	0.0796	17.3027	0.1126	1.4967
								12.148	1.4932	0.0776	17.2628	0.1098	1.4932
								12.168	1.4899	0.0768	17.2244	0.1087	1.4899
								12.188	1.4865	0.0754	17.185	0.1067	1.4865
								12.208	1.483	0.0757	17.1443	0.1071	1.483
								12.228	1.4795	0.0764	17.1044	0.1081	1.4795
								12.248	1.4764	0.0757	17.0683	0.1071	1.4764
								12.268	1.4736	0.075	17.0359	0.1061	1.4736
								12.288	1.4709	0.0737	17.0046	0.1043	1.4709
								12.308	1.4681	0.0724	16.9719	0.1025	1.4681
								12.328	1.4651	0.0742	16.9373	0.1049	1.4651
								12.348	1.462	0.073	16.9012	0.1032	1.4619
								12.368	1.4587	0.0725	16.8631	0.1025	1.4587
								12.388	1.4551	0.0704	16.8221	0.0996	1.4551
								12.408	1.4513	0.0701	16.7782	0.0992	1.4513
								12.428	1.4474	0.0728	16.7331	0.103	1.4474
								12.448	1.4436	0.0707	16.6892	0.1	1.4436
								12.468	1.44	0.0701	16.6473	0.0992	1.44
								12.488	1.4364	0.0688	16.6058	0.0974	1.4364
								12.508	1.4327	0.0702	16.5632	0.0994	1.4327
								12.528	1.429	0.0706	16.52	0.0999	1.429
								12.548	1.4255	0.0702	16.4798	0.0992	1.4255
								12.568	1.4225	0.0717	16.4452	0.1015	1.4225
								12.588	1.4199	0.0678	16.4144	0.096	1.4198
								12.608	1.4172	0.0682	16.3832	0.0965	1.4171
								12.628	1.4142	0.067	16.3494	0.0948	1.4142
								12.648	1.4111	0.0656	16.3134	0.0928	1.4111
								12.668	1.4078	0.0666	16.2754	0.0942	1.4078
								12.688	1.4044	0.0668	16.2353	0.0945	1.4043
								12.708	1.4007	0.0683	16.1932	0.0967	1.4007
								12.728	1.397	0.0681	16.1502	0.0964	1.397
								12.748	1.3933	0.0664	16.1071	0.094	1.3933
								12.768	1.3897	0.0657	16.0661	0.093	1.3897
								12.788	1.3864	0.0635	16.0272	0.0898	1.3863
								12.808	1.383	0.0636	15.9884	0.09	1.383
								12.828	1.3796	0.0637	15.9491	0.0902	1.3796
								12.848	1.3763	0.0647	15.9103	0.0916	1.3762
								12.868	1.3732	0.0666	15.8746	0.0942	1.3732
								12.888	1.3704	0.0628	15.8423	0.0889	1.3704
								12.908	1.3677	0.064	15.8111	0.0905	1.3677
								12.928	1.3649	0.0641	15.7785	0.0907	1.3648
								12.948	1.3618	0.0622	15.7434	0.0879	1.3618
								12.968	1.3586	0.061	15.7065	0.0863	1.3586
								12.988	1.3553	0.0594	15.668	0.084	1.3553
								13.008	1.3518	0.0601	15.6271	0.0851	1.3517
								13.028	1.348	0.0606	15.5842	0.0857	1.348
								13.048	1.3442	0.0597	15.54	0.0844	1.3442
								13.068	1.3405	0.0625	15.4964	0.0884	1.3404
								13.088	1.3368	0.0589	15.4547	0.0834	1.3368
								13.108	1.3333	0.0597	15.4141	0.0845	1.3333
								13.128	1.3298	0.0575	15.3729	0.0813	1.3298
								13.148	1.3261	0.0596	15.3308	0.0843	1.3261
								13.168	1.3226	0.0606	15.2899	0.0857	1.3226
								13.188	1.3194	0.0581	15.2534	0.0822	1.3194
								13.208	1.3166	0.0582	15.221	0.0824	1.3166
								13.228	1.3139	0.0566	15.1894	0.0801	1.3139
								13.248	1.311	0.0566	15.1557	0.0801	1.311
								13.268	1.3079	0.0591	15.12	0.0836	1.3079
								13.288	1.3047	0.0551	15.0826	0.078	1.3046
								13.308	1.3012	0.0562	15.043	0.0795	1.3012
								13.328	1.2976	0.0554	15.0013	0.0784	1.2976
								13.348	1.2939	0.0573	14.9588	0.0811	1.2939
								13.368	1.2902	0.0573	14.916	0.081	1.2902
								13.388	1.2866	0.0553	14.8741	0.0783	1.2866
								13.408	1.2831	0.0568	14.8337	0.0804	1.2831
								13.428	1.2797	0.0532	14.7939	0.0753	1.2797
								13.448	1.2762	0.0548	14.7538	0.0775	1.2762
								13.468	1.2727	0.0555	14.7135	0.0785	1.2727
								13.488	1.2695	0.0562	14.6759	0.0795	1.2695
								13.508	1.2666	0.0554	14.6425	0.0784	1.2666
								13.528	1.2639	0.0536	14.6115	0.0758	1.2639
								13.548	1.2611	0.0531	14.5795	0.0751	1.2611
								13.568	1.2582	0.0535	14.545	0.0758	1.2581
								13.588	1.255	0.0518	14.5088	0.0733	1.255
								13.608	1.2518	0.0532	14.4712	0.0753	1.2518
								13.628	1.2483	0.051	14.4312	0.0722	1.2483
								13.648	1.2446	0.0524	14.3887	0.0742	1.2446
								13.668	1.2408	0.0534	14.3448	0.0755	1.2408
								13.688	1.237	0.0522	14.301	0.0739	1.237
								13.708	1.2334	0.0533	14.2588	0.0755	1.2334
								13.728	1.2298	0.0516	14.2176	0.073	1.2298
								13.748	1.2262	0.0511	14.1753	0.0723	1.2262
								13.768	1.2224	0.051	14.1315	0.0721	1.2224
								13.788	1.2187	0.0505	14.0889	0.0715	1.2187
								13.808	1.2155	0.0521	14.0518	0.0737	1.2155
								13.828	1.2128	0.0496	14.0203	0.0702	1.2128
								13.848	1.2102	0.0514	13.9902	0.0727	1.2101
								13.868	1.2074	0.0507	13.9582	0.0718	1.2074
								13.888	1.2044	0.0502	13.9236	0.071	1.2044
								13.908	1.2012	0.0491	13.8871	0.0695	1.2012
								13.928	1.1979	0.0458	13.8489	0.0648	1.1979
								13.948	1.1945	0.0485	13.8087	0.0687	1.1945
								13.968	1.1908	0.0483	13.7668	0.0683	1.1908
								13.988	1.1871	0.0479	13.7239	0.0678	1.1871
								14.008	1.1834	0.0489	13.6812	0.0691	1.1834
								14.028	1.1799	0.0472	13.6402	0.0668	1.1799
								14.048	1.1765	0.049	13.6007	0.0693	1.1765
								14.068	1.1731	0.0481	13.5613	0.068	1.1731
								14.088	1.1696	0.0484	13.5215	0.0685	1.1696
								14.108	1.1663	0.0502	13.4831	0.071	1.1663
								14.128	1.1633	0.047	13.4484	0.0665	1.1633
								14.148	1.1606	0.0462	13.417	0.0654	1.1606
								14.168	1.1579	0.0434	13.386	0.0614	1.1579
								14.188	1.155	0.0451	13.3529	0.0638	1.155
								14.208	1.152	0.0438	13.3174	0.062	1.152
								14.228	1.1487	0.0427	13.2796	0.0604	1.1487
								14.248	1.1452	0.0441	13.2391	0.0624	1.1452
								14.268	1.1415	0.0448	13.1958	0.0634	1.1414
								14.288	1.1375	0.0449	13.1502	0.0634	1.1375
								14.308	1.1335	0.0461	13.1041	0.0652	1.1335
								14.328	1.1298	0.0435	13.0606	0.0616	1.1297
								14.348	1.1262	0.0454	13.0195	0.0642	1.1262
								14.368	1.1227	0.0448	12.9785	0.0633	1.1226
								14.388	1.119	0.0464	12.9365	0.0657	1.119
								14.408	1.1154	0.0453	12.8952	0.0641	1.1154
								14.428	1.1122	0.0444	12.8579	0.0629	1.1122
								14.448	1.1094	0.0459	12.8252	0.0649	1.1094
								14.468	1.1067	0.0436	12.7942	0.0617	1.1067
								14.488	1.1039	0.0437	12.7618	0.0618	1.1039
								14.508	1.1009	0.0433	12.7267	0.0612	1.1009
								14.528	1.0977	0.0425	12.6897	0.0601	1.0977
								14.548	1.0943	0.0427	12.6507	0.0605	1.0943
								14.568	1.0908	0.0408	12.6101	0.0577	1.0908
								14.588	1.0872	0.0418	12.5687	0.0591	1.0872
								14.608	1.0836	0.0419	12.5271	0.0593	1.0836
								14.628	1.08	0.0412	12.486	0.0583	1.08
								14.648	1.0766	0.0421	12.4463	0.0596	1.0766
								14.668	1.0732	0.0389	12.4069	0.0551	1.0732
								14.688	1.0697	0.0417	12.3659	0.059	1.0696
								14.708	1.066	0.0423	12.324	0.0598	1.066
								14.728	1.0626	0.0429	12.2843	0.0607	1.0626
								14.748	1.0596	0.0431	12.2496	0.061	1.0596
								14.768	1.057	0.0397	12.219	0.0562	1.0569
								14.788	1.0543	0.0387	12.1886	0.0547	1.0543
								14.808	1.0515	0.0387	12.156	0.0548	1.0515
								14.828	1.0485	0.0383	12.1213	0.0541	1.0485
								14.848	1.0454	0.0385	12.0852	0.0545	1.0454
								14.868	1.0421	0.0386	12.0473	0.0545	1.0421
								14.888	1.0386	0.0387	12.0072	0.0547	1.0386
								14.908	1.035	0.0381	11.9647	0.054	1.0349
								14.928	1.0311	0.0385	11.9199	0.0545	1.0311
								14.948	1.0272	0.0388	11.875	0.0549	1.0272
								14.968	1.0235	0.0383	11.8318	0.0542	1.0234
								14.988	1.0198	0.0378	11.7892	0.0534	1.0198
								15.008	1.016	0.0379	11.7456	0.0536	1.016
								15.028	1.0122	0.039	11.7018	0.0552	1.0122
								15.048	1.0088	0.041	11.6621	0.058	1.0088
								15.068	1.0059	0.0383	11.6285	0.0542	1.0059
								15.088	1.0033	0.0399	11.5984	0.0565	1.0033
								15.108	1.0006	0.0393	11.5675	0.0556	1.0006
								15.128	0.9977	0.0388	11.5339	0.0549	0.9977
								15.148	0.9946	0.0383	11.4979	0.0542	0.9946
								15.168	0.9913	0.036	11.4603	0.0509	0.9913
								15.188	0.9879	0.0387	11.421	0.0547	0.9879
								15.208	0.9844	0.0368	11.3798	0.052	0.9843
								15.228	0.9807	0.0361	11.337	0.051	0.9807
								15.248	0.9769	0.0381	11.2936	0.0539	0.9769
								15.268	0.9733	0.0365	11.2513	0.0516	0.9732
								15.288	0.9698	0.0372	11.2109	0.0526	0.9697
								15.308	0.9663	0.038	11.1714	0.0537	0.9663
								15.328	0.9629	0.0371	11.1318	0.0524	0.9629
								15.348	0.9595	0.0394	11.0928	0.0558	0.9595
								15.368	0.9564	0.0357	11.0568	0.0506	0.9564
								15.388	0.9536	0.0369	11.0245	0.0522	0.9536
								15.408	0.9509	0.0344	10.9934	0.0487	0.9509
								15.428	0.9481	0.0352	10.9604	0.0497	0.9481
								15.448	0.945	0.0342	10.9248	0.0483	0.945
								15.468	0.9417	0.0345	10.8871	0.0488	0.9417
								15.488	0.9383	0.0367	10.8473	0.0519	0.9383
								15.508	0.9347	0.0356	10.8053	0.0503	0.9347
								15.528	0.9309	0.0339	10.7614	0.0479	0.9309
								15.548	0.927	0.035	10.7166	0.0495	0.927
								15.568	0.9232	0.0341	10.6728	0.0483	0.9232
								15.588	0.9196	0.0335	10.6309	0.0473	0.9196
								15.608	0.916	0.0331	10.5899	0.0469	0.916
								15.628	0.9124	0.0335	10.5481	0.0474	0.9124
								15.648	0.9088	0.0341	10.506	0.0483	0.9088
								15.668	0.9054	0.0344	10.4666	0.0487	0.9054
								15.688	0.9024	0.0353	10.4321	0.05	0.9024
								15.708	0.8997	0.0324	10.4011	0.0459	0.8997
								15.728	0.897	0.0324	10.37	0.0459	0.897
								15.748	0.8941	0.0324	10.3363	0.0458	0.8941
								15.768	0.891	0.0321	10.3005	0.0454	0.891
								15.788	0.8878	0.0326	10.2634	0.0461	0.8878
								15.808	0.8845	0.0317	10.2252	0.0448	0.8845
								15.828	0.8811	0.0317	10.1856	0.0448	0.8811
								15.848	0.8775	0.0333	10.1444	0.0472	0.8775
								15.868	0.8739	0.0334	10.1024	0.0472	0.8739
								15.888	0.8703	0.0341	10.061	0.0483	0.8703
								15.908	0.8669	0.0311	10.0214	0.044	0.8669
								15.928	0.8635	0.0309	9.9822	0.0438	0.8635
								15.948	0.86	0.0311	9.9417	0.044	0.86
								15.968	0.8564	0.0308	9.9007	0.0436	0.8564
								15.988	0.8531	0.0324	9.8621	0.0458	0.8531
								16.008	0.8501	0.0329	9.8276	0.0466	0.8501
								16.028	0.8473	0.0309	9.7957	0.0437	0.8473
								16.048	0.8445	0.0305	9.7631	0.0431	0.8445
								16.068	0.8415	0.0297	9.7282	0.042	0.8415
								16.088	0.8383	0.0319	9.6917	0.0451	0.8383
								16.108	0.8351	0.0294	9.6536	0.0417	0.835
								16.128	0.8316	0.0304	9.6137	0.043	0.8316
								16.148	0.8279	0.0288	9.5713	0.0407	0.8279
								16.168	0.8241	0.0286	9.5268	0.0405	0.8241
								16.188	0.8202	0.0299	9.4818	0.0424	0.8202
								16.208	0.8164	0.0283	9.4383	0.04	0.8164
								16.228	0.8128	0.0293	9.3963	0.0414	0.8128
								16.248	0.8091	0.0307	9.3541	0.0434	0.8091
								16.268	0.8054	0.0309	9.311	0.0437	0.8054
								16.288	0.8019	0.0313	9.27	0.0443	0.8019
								16.308	0.7988	0.0304	9.2345	0.043	0.7988
								16.328	0.7961	0.0299	9.2038	0.0424	0.7961
								16.348	0.7936	0.0275	9.1741	0.0389	0.7936
								16.368	0.7908	0.0266	9.1423	0.0377	0.7908
								16.388	0.7878	0.0281	9.1079	0.0398	0.7878
								16.408	0.7847	0.0272	9.0714	0.0384	0.7847
								16.428	0.7813	0.0299	9.0324	0.0423	0.7813
								16.448	0.7777	0.0275	8.9911	0.0389	0.7777
								16.468	0.774	0.0295	8.9484	0.0417	0.774
								16.488	0.7703	0.0273	8.9052	0.0387	0.7703
								16.508	0.7667	0.0289	8.8634	0.0409	0.7667
								16.528	0.7633	0.0282	8.8238	0.0399	0.7633
								16.548	0.7599	0.0272	8.7849	0.0385	0.7599
								16.568	0.7565	0.0275	8.7451	0.0389	0.7565
								16.588	0.753	0.0288	8.7048	0.0408	0.753
								16.608	0.7497	0.0277	8.6666	0.0391	0.7497
								16.628	0.7468	0.0287	8.6329	0.0406	0.7467
								16.648	0.7441	0.026	8.6022	0.0368	0.7441
								16.668	0.7414	0.0257	8.5709	0.0363	0.7414
								16.688	0.7384	0.0268	8.5366	0.0379	0.7384
								16.708	0.7352	0.0251	8.4994	0.0355	0.7352
								16.728	0.7318	0.0266	8.4602	0.0376	0.7318
								16.748	0.7283	0.025	8.4189	0.0354	0.7282
								16.768	0.7245	0.0257	8.376	0.0363	0.7245
								16.788	0.7207	0.0268	8.3318	0.0379	0.7207
								16.808	0.7169	0.0266	8.2874	0.0376	0.7169
								16.828	0.7132	0.0254	8.2448	0.0359	0.7132
								16.848	0.7097	0.0233	8.2042	0.0329	0.7097
								16.868	0.7062	0.0239	8.164	0.0338	0.7062
								16.888	0.7026	0.0245	8.1228	0.0346	0.7026
								16.908	0.6991	0.0236	8.0819	0.0334	0.6991
								16.928	0.6959	0.0268	8.0445	0.038	0.6958
								16.948	0.693	0.024	8.0118	0.034	0.693
								16.968	0.6904	0.0249	7.9812	0.0353	0.6904
								16.988	0.6876	0.0246	7.9491	0.0348	0.6876
								17.008	0.6846	0.0253	7.9145	0.0358	0.6846
								17.028	0.6815	0.0262	7.8781	0.0371	0.6815
								17.048	0.6782	0.0243	7.8398	0.0344	0.6781
								17.068	0.6747	0.0249	7.7996	0.0352	0.6747
								17.088	0.6711	0.0238	7.7581	0.0337	0.6711
								17.108	0.6674	0.0232	7.716	0.0329	0.6674
								17.128	0.6638	0.0246	7.6739	0.0348	0.6638
								17.148	0.6603	0.0238	7.6332	0.0337	0.6603
								17.168	0.6569	0.0257	7.5936	0.0364	0.6568
								17.188	0.6534	0.0243	7.5536	0.0344	0.6534
								17.208	0.6498	0.0256	7.5123	0.0362	0.6498
								17.228	0.6463	0.0269	7.4716	0.0381	0.6463
								17.248	0.6431	0.0249	7.4344	0.0352	0.6431
								17.268	0.6402	0.022	7.4012	0.0312	0.6402
								17.288	0.6374	0.0214	7.369	0.0303	0.6374
								17.308	0.6345	0.0216	7.3351	0.0306	0.6345
								17.328	0.6314	0.024	7.2993	0.0339	0.6314
								17.348	0.6282	0.0226	7.2622	0.032	0.6282
								17.368	0.6248	0.0238	7.2232	0.0336	0.6248
								17.388	0.6212	0.0223	7.1816	0.0315	0.6212
								17.408	0.6174	0.0226	7.1375	0.032	0.6174
								17.428	0.6135	0.0244	7.0923	0.0345	0.6135
								17.448	0.6097	0.0227	7.048	0.0321	0.6097
								17.468	0.606	0.0226	7.0056	0.0319	0.606
								17.488	0.6024	0.021	6.9638	0.0297	0.6024
								17.508	0.5988	0.0227	6.9219	0.032	0.5987
								17.528	0.5952	0.0227	6.8804	0.0322	0.5952
								17.548	0.5919	0.0225	6.8428	0.0318	0.5919
								17.568	0.5892	0.0229	6.8111	0.0324	0.5892
								17.588	0.5867	0.0215	6.782	0.0304	0.5866
								17.608	0.584	0.0207	6.7516	0.0293	0.584
								17.628	0.5812	0.0227	6.7184	0.0321	0.5811
								17.648	0.5781	0.0212	6.6832	0.03	0.5781
								17.668	0.5749	0.022	6.6464	0.0311	0.5749
								17.688	0.5716	0.0197	6.6076	0.0278	0.5716
								17.708	0.568	0.0207	6.5669	0.0292	0.568
								17.728	0.5644	0.0195	6.5244	0.0276	0.5644
								17.748	0.5606	0.0198	6.4808	0.028	0.5606
								17.768	0.5569	0.0216	6.4382	0.0306	0.5569
								17.788	0.5534	0.0204	6.3975	0.0288	0.5534
								17.808	0.5499	0.0197	6.3576	0.0278	0.5499
								17.828	0.5464	0.0202	6.3171	0.0285	0.5464
								17.848	0.543	0.0206	6.2768	0.0291	0.5429
								17.868	0.5398	0.0221	6.2398	0.0313	0.5397
								17.888	0.5369	0.02	6.2069	0.0283	0.5369
								17.908	0.5342	0.0184	6.1758	0.0261	0.5342
								17.928	0.5314	0.0196	6.1436	0.0277	0.5314
								17.948	0.5284	0.0184	6.109	0.0261	0.5284
								17.968	0.5252	0.0201	6.072	0.0284	0.5252
								17.988	0.5218	0.0169	6.0321	0.0239	0.5218
								18.008	0.5181	0.0204	5.9891	0.0288	0.5181
								18.028	0.5141	0.0191	5.9432	0.0271	0.5141
								18.048	0.51	0.017	5.8959	0.0241	0.51
								18.068	0.506	0.0199	5.85	0.0281	0.506
								18.088	0.5024	0.0189	5.8077	0.0267	0.5024
								18.108	0.499	0.0199	5.7681	0.0282	0.4989
								18.128	0.4955	0.0198	5.7286	0.028	0.4955
								18.148	0.4921	0.0202	5.6889	0.0286	0.4921
								18.168	0.4889	0.0213	5.6515	0.0301	0.4889
								18.188	0.486	0.0185	5.618	0.0261	0.486
								18.208	0.4833	0.0189	5.5875	0.0268	0.4833
								18.228	0.4807	0.0189	5.5569	0.0267	0.4807
								18.248	0.4778	0.0179	5.524	0.0253	0.4778
								18.268	0.4748	0.0183	5.4884	0.0258	0.4747
								18.288	0.4715	0.0183	5.4509	0.0258	0.4715
								18.308	0.4681	0.019	5.4115	0.0269	0.4681
								18.328	0.4646	0.0177	5.3704	0.0251	0.4645
								18.348	0.4609	0.0168	5.328	0.0238	0.4609
								18.368	0.4571	0.0203	5.2847	0.0288	0.4571
								18.388	0.4535	0.0178	5.2424	0.0252	0.4535
								18.408	0.45	0.02	5.202	0.0283	0.45
								18.428	0.4466	0.0178	5.1624	0.0251	0.4465
								18.448	0.443	0.0176	5.1217	0.0249	0.443
								18.468	0.4395	0.0192	5.0806	0.0272	0.4395
								18.488	0.4361	0.0191	5.0419	0.0271	0.4361
								18.508	0.4332	0.0193	5.0076	0.0273	0.4332
								18.528	0.4304	0.0182	4.9757	0.0257	0.4304
								18.548	0.4276	0.0184	4.943	0.026	0.4276
								18.568	0.4246	0.018	4.9086	0.0255	0.4246
								18.588	0.4215	0.0176	4.8729	0.025	0.4215
								18.608	0.4183	0.0167	4.8357	0.0236	0.4183
								18.628	0.4149	0.0157	4.7959	0.0222	0.4148
								18.648	0.4112	0.015	4.7536	0.0212	0.4112
								18.668	0.4074	0.0173	4.7097	0.0244	0.4074
								18.688	0.4036	0.0165	4.6656	0.0233	0.4036
								18.708	0.4	0.0181	4.6236	0.0257	0.3999
								18.728	0.3965	0.0153	4.5831	0.0217	0.3964
								18.748	0.3929	0.0176	4.5423	0.0249	0.3929
								18.768	0.3893	0.0183	4.5004	0.0259	0.3893
								18.788	0.3858	0.0189	4.4597	0.0267	0.3858
								18.808	0.3826	0.0193	4.4232	0.0273	0.3826
								18.828	0.3799	0.0163	4.3915	0.023	0.3799
								18.848	0.3773	0.0166	4.3615	0.0235	0.3773
								18.868	0.3746	0.0165	4.33	0.0234	0.3745
								18.888	0.3716	0.0165	4.2959	0.0234	0.3716
								18.908	0.3685	0.0162	4.2596	0.0229	0.3685
								18.928	0.3651	0.0137	4.2211	0.0194	0.3651
								18.948	0.3616	0.0179	4.1806	0.0253	0.3616
								18.968	0.358	0.0171	4.1384	0.0242	0.358
								18.988	0.3542	0.0156	4.0948	0.022	0.3542
								19.008	0.3504	0.0164	4.051	0.0232	0.3504
								19.028	0.3468	0.015	4.0087	0.0213	0.3468
								19.048	0.3432	0.0158	3.9675	0.0223	0.3432
								19.068	0.3396	0.0154	3.9264	0.0217	0.3396
								19.088	0.3361	0.0163	3.8854	0.0231	0.3361
								19.108	0.3328	0.016	3.8468	0.0226	0.3327
								19.128	0.3298	0.0133	3.8124	0.0188	0.3298
								19.148	0.3271	0.0149	3.7809	0.0211	0.3271
								19.168	0.3243	0.0175	3.7492	0.0247	0.3243
								19.188	0.3214	0.0165	3.7149	0.0233	0.3213
								19.208	0.3182	0.0172	3.678	0.0243	0.3181
								19.228	0.3148	0.0137	3.6392	0.0194	0.3148
								19.248	0.3112	0.014	3.598	0.0198	0.3112
								19.268	0.3075	0.0135	3.5546	0.0191	0.3075
								19.288	0.3036	0.0146	3.5099	0.0207	0.3036
								19.308	0.2997	0.0154	3.4651	0.0218	0.2997
								19.328	0.296	0.0143	3.4223	0.0203	0.296
								19.348	0.2925	0.0154	3.3818	0.0217	0.2925
								19.368	0.2891	0.0143	3.3419	0.0202	0.2891
								19.388	0.2856	0.0146	3.3014	0.0206	0.2856
								19.408	0.2821	0.0178	3.2615	0.0252	0.2821
								19.428	0.279	0.0169	3.2254	0.024	0.279
								19.448	0.2763	0.0164	3.194	0.0231	0.2763
								19.468	0.2737	0.0136	3.1643	0.0193	0.2737
								19.488	0.271	0.0135	3.1332	0.0191	0.271
								19.508	0.2681	0.0139	3.0991	0.0196	0.2681
								19.528	0.265	0.0127	3.063	0.018	0.2649
								19.548	0.2617	0.014	3.0254	0.0198	0.2617
								19.568	0.2583	0.0125	2.9858	0.0177	0.2583
								19.588	0.2547	0.0118	2.9444	0.0167	0.2547
								19.608	0.251	0.0146	2.9012	0.0207	0.251
								19.628	0.2472	0.0141	2.8572	0.02	0.2471
								19.648	0.2435	0.0173	2.815	0.0245	0.2435
								19.668	0.24	0.0139	2.7744	0.0196	0.24
								19.688	0.2365	0.0125	2.7335	0.0177	0.2364
								19.708	0.2328	0.0145	2.6915	0.0206	0.2328
								19.728	0.2293	0.0139	2.6506	0.0196	0.2293
								19.748	0.2261	0.0163	2.614	0.0231	0.2261
								19.768	0.2233	0.0142	2.5814	0.02	0.2233
								19.788	0.2206	0.0138	2.5499	0.0195	0.2206
								19.808	0.2177	0.0133	2.5165	0.0188	0.2177
								19.828	0.2146	0.0128	2.4809	0.0181	0.2146
								19.848	0.2114	0.0121	2.4436	0.0171	0.2114
								19.868	0.208	0.0128	2.4047	0.0181	0.208
								19.888	0.2045	0.0113	2.3638	0.016	0.2045
								19.908	0.2008	0.0119	2.3209	0.0169	0.2008
								19.928	0.197	0.0109	2.2772	0.0154	0.197
								19.948	0.1933	0.0146	2.2347	0.0206	0.1933
								19.968	0.1898	0.0121	2.1942	0.0172	0.1898
								19.988	0.1864	0.0132	2.1542	0.0186	0.1863
								20.008	0.1828	0.0109	2.113	0.0154	0.1828
								20.028	0.1792	0.0117	2.0712	0.0166	0.1792
								20.048	0.1758	0.0143	2.0322	0.0202	0.1758
								20.068	0.1728	0.0126	1.9979	0.0179	0.1728
								20.088	0.1702	0.0133	1.9669	0.0189	0.1701
								20.108	0.1675	0.0121	1.9359	0.0171	0.1675
								20.128	0.1646	0.0106	1.9027	0.015	0.1646
								20.148	0.1615	0.0128	1.867	0.0181	0.1615
								20.168	0.1583	0.0095	1.8294	0.0134	0.1582
								20.188	0.1548	0.0105	1.7897	0.0148	0.1548
								20.208	0.1512	0.0119	1.7481	0.0168	0.1512
								20.228	0.1475	0.0126	1.7051	0.0178	0.1475
								20.248	0.1437	0.014	1.6615	0.0197	0.1437
								20.268	0.1401	0.0117	1.6191	0.0165	0.14
								20.288	0.1365	0.0119	1.5782	0.0168	0.1365
								20.308	0.133	0.0115	1.5371	0.0163	0.133
								20.328	0.1293	0.0132	1.4948	0.0187	0.1293
								20.348	0.1258	0.0137	1.4538	0.0193	0.1258
								20.368	0.1226	0.0123	1.4177	0.0174	0.1226
								20.388	0.1199	0.012	1.3863	0.017	0.1199
								20.408	0.1173	0.0101	1.3558	0.0143	0.1173
								20.428	0.1145	0.0096	1.3232	0.0135	0.1145
								20.448	0.1114	0.0115	1.288	0.0163	0.1114
								20.468	0.1082	0.0108	1.251	0.0153	0.1082
								20.488	0.1049	0.0126	1.212	0.0178	0.1048
								20.508	0.1013	0.0104	1.1711	0.0147	0.1013
								20.528	0.0976	0.0105	1.1287	0.0149	0.0976
								20.548	0.0939	0.0118	1.085	0.0166	0.0938
								20.568	0.0901	0.0113	1.0416	0.016	0.0901
								20.588	0.0865	0.012	1.0003	0.0169	0.0865
								20.608	0.0831	0.0104	0.9604	0.0147	0.0831
								20.628	0.0796	0.0092	0.9201	0.013	0.0796
								20.648	0.076	0.0119	0.8787	0.0169	0.076
								20.668	0.0726	0.0112	0.8393	0.0158	0.0726
								20.688	0.0696	0.013	0.8045	0.0184	0.0696
								20.708	0.0669	0.0115	0.7735	0.0163	0.0669
								20.728	0.0643	0.0111	0.7427	0.0157	0.0642
								20.748	0.0614	0.0112	0.7097	0.0159	0.0614
								20.768	0.0583	0.01	0.6743	0.0141	0.0583
								20.788	0.0551	0.0112	0.6371	0.0159	0.0551
								20.808	0.0517	0.0091	0.5976	0.0128	0.0517
								20.828	0.0481	0.0106	0.5556	0.015	0.0481
								20.848	0.0443	0.0115	0.5125	0.0162	0.0443
								20.868	0.0406	0.0107	0.4689	0.0151	0.0406
								20.888	0.0369	0.0116	0.4261	0.0165	0.0369
								20.908	0.0333	0.0109	0.3848	0.0154	0.0333
								20.928	0.0298	0.0106	0.344	0.015	0.0298
								20.948	0.0262	0.0115	0.3025	0.0163	0.0262
								20.968	0.0226	0.0092	0.261	0.0131	0.0226
								20.988	0.0193	0.0105	0.2225	0.0149	0.0192
								21.008	0.0163	0.0072	0.1887	0.0102	0.0163
								21.028	0.0136	0.0102	0.1571	0.0144	0.0136
								21.048	0.0108	0.0097	0.1244	0.0137	0.0108
								21.068	0.0078	0.0104	0.0895	0.0147	0.0077
								21.088	0.0046	0.0098	0.053	0.0138	0.0046
								21.108	0.0013	0.0101	0.0154	0.0142	0.0013
								21.116	0	0.0095	-0.0002	0.0134	0
								21.117	-0.0002	0.0095	-0.0021	0.0134	-0.0002
								21.118	-0.0003	0.0095	-0.0041	0.0134	-0.0004
								21.138	-0.0037	0.0129	-0.0434	0.0183	-0.0038
								21.158	-0.006	0.0126	-0.069	0.0178	-0.006
								21.178	-0.0065	0.0118	-0.0748	0.0167	-0.0065
								21.198	-0.0061	0.0098	-0.071	0.0139	-0.0061
								21.218	-0.0056	0.0093	-0.0644	0.0132	-0.0056
								21.238	-0.0049	0.0079	-0.0567	0.0111	-0.0049
								21.258	-0.0041	0.0116	-0.0479	0.0163	-0.0041
								21.278	-0.0031	0.0108	-0.0361	0.0152	-0.0031
								21.298	-0.0016	0.0122	-0.0191	0.0173	-0.0017
								21.318	0.0004	0.0147	0.0047	0.0208	0.0004
								21.338	0.0032	0.0114	0.0372	0.0161	0.0032
								21.358	0.0061	0.0103	0.0708	0.0146	0.0061
								21.378	0.0087	0.0116	0.1003	0.0165	0.0087
								21.398	0.0112	0.0127	0.1294	0.0179	0.0112
								21.418	0.014	0.0121	0.162	0.0172	0.014
								21.438	0.0172	0.0116	0.1984	0.0164	0.0172
								21.458	0.0206	0.0116	0.2376	0.0164	0.0206
								21.478	0.0242	0.0113	0.2794	0.016	0.0242
								21.498	0.028	0.0114	0.3236	0.0162	0.028
								21.518	0.0319	0.0113	0.369	0.016	0.0319
								21.538	0.0359	0.0112	0.4143	0.0158	0.0358
								21.558	0.0396	0.0123	0.4573	0.0174	0.0396
								21.578	0.0431	0.0138	0.4981	0.0195	0.0431
								21.598	0.0466	0.0155	0.5387	0.0219	0.0466
								21.618	0.0502	0.0142	0.58	0.02	0.0502
								21.638	0.0537	0.0125	0.6206	0.0177	0.0537
								21.658	0.0569	0.0138	0.6572	0.0196	0.0568
								21.678	0.0596	0.0136	0.689	0.0192	0.0596
								21.698	0.0622	0.0153	0.7193	0.0217	0.0622
								21.718	0.065	0.0154	0.7511	0.0218	0.065
								21.738	0.068	0.0137	0.7855	0.0194	0.0679
								21.758	0.0711	0.0168	0.8219	0.0238	0.0711
								21.778	0.0744	0.0154	0.8601	0.0218	0.0744
								21.798	0.078	0.0169	0.9011	0.0239	0.0779
								21.818	0.0817	0.0156	0.9445	0.022	0.0817
								21.838	0.0856	0.0154	0.9891	0.0218	0.0856
								21.858	0.0894	0.0161	1.0335	0.0228	0.0894
								21.878	0.0931	0.0163	1.076	0.023	0.0931
								21.898	0.0967	0.0164	1.1173	0.0231	0.0966
								21.918	0.1003	0.017	1.1592	0.024	0.1003
								21.938	0.1039	0.0152	1.2016	0.0215	0.1039
								21.958	0.1074	0.0154	1.2418	0.0218	0.1074
								21.978	0.1105	0.0135	1.277	0.0192	0.1105
								21.998	0.1132	0.0173	1.3084	0.0245	0.1132
								22.018	0.1159	0.017	1.34	0.0241	0.1159
								22.038	0.1189	0.0174	1.3742	0.0246	0.1189
								22.058	0.1221	0.0181	1.4108	0.0256	0.122
								22.078	0.1254	0.0182	1.4493	0.0257	0.1254
								22.098	0.1289	0.0193	1.4896	0.0273	0.1288
								22.118	0.1325	0.0178	1.5321	0.0251	0.1325
								22.138	0.1363	0.0182	1.576	0.0257	0.1363
								22.158	0.1401	0.0183	1.6198	0.026	0.1401
								22.178	0.1437	0.0174	1.6617	0.0246	0.1437
								22.198	0.1472	0.0195	1.7015	0.0276	0.1472
								22.218	0.1506	0.0182	1.7413	0.0257	0.1506
								22.238	0.1542	0.0169	1.7825	0.0239	0.1542
								22.258	0.1577	0.0159	1.8235	0.0225	0.1577
								22.278	0.161	0.0138	1.8609	0.0195	0.161
								22.298	0.1638	0.0183	1.8934	0.0259	0.1638
								22.318	0.1664	0.0188	1.9236	0.0266	0.1664
								22.338	0.1691	0.0209	1.955	0.0295	0.1691
								22.358	0.1721	0.0196	1.9893	0.0277	0.1721
								22.378	0.1752	0.0201	2.0254	0.0284	0.1752
								22.398	0.1785	0.0214	2.0632	0.0302	0.1785
								22.418	0.182	0.0196	2.1036	0.0277	0.182
								22.438	0.1857	0.0192	2.1465	0.0272	0.1857
								22.458	0.1895	0.0201	2.1908	0.0284	0.1895
								22.478	0.1933	0.019	2.2347	0.0269	0.1933
								22.498	0.1969	0.0205	2.2764	0.0289	0.1969
								22.518	0.2004	0.0194	2.3168	0.0274	0.2004
								22.538	0.204	0.0211	2.3578	0.0299	0.2039
								22.558	0.2076	0.0231	2.3998	0.0327	0.2076
								22.578	0.2111	0.0203	2.4398	0.0287	0.211
								22.598	0.2141	0.0202	2.4751	0.0285	0.2141
								22.618	0.2168	0.0206	2.5066	0.0292	0.2168
								22.638	0.2195	0.0222	2.5377	0.0314	0.2195
								22.658	0.2224	0.023	2.5707	0.0326	0.2224
								22.678	0.2255	0.0219	2.6062	0.031	0.2254
								22.698	0.2287	0.0237	2.6433	0.0336	0.2286
								22.718	0.2321	0.0217	2.6827	0.0307	0.232
								22.738	0.2357	0.0207	2.7248	0.0293	0.2357
								22.758	0.2395	0.0212	2.7688	0.0299	0.2395
								22.778	0.2434	0.0212	2.8133	0.03	0.2433
								22.798	0.2471	0.0222	2.856	0.0314	0.247
								22.818	0.2505	0.0215	2.8959	0.0304	0.2505
								22.838	0.2539	0.0233	2.9351	0.0329	0.2539
								22.858	0.2574	0.024	2.9754	0.0339	0.2574
								22.878	0.261	0.0219	3.0167	0.0309	0.2609
								22.898	0.2643	0.0218	3.0553	0.0308	0.2643
								22.918	0.2672	0.0233	3.0888	0.033	0.2672
								22.938	0.2698	0.0238	3.1195	0.0337	0.2698
								22.958	0.2726	0.0252	3.1512	0.0356	0.2726
								22.978	0.2755	0.0236	3.1852	0.0334	0.2755
								22.998	0.2786	0.0273	3.2209	0.0386	0.2786
								23.018	0.2819	0.0228	3.2584	0.0322	0.2818
								23.038	0.2854	0.026	3.299	0.0368	0.2854
								23.058	0.2892	0.0251	3.3427	0.0355	0.2891
								23.078	0.2931	0.0258	3.3878	0.0365	0.293
								23.098	0.2969	0.0249	3.4327	0.0352	0.2969
								23.118	0.3007	0.0237	3.4757	0.0336	0.3006
								23.138	0.3042	0.0247	3.5168	0.0349	0.3042
								23.158	0.3078	0.0264	3.5581	0.0373	0.3078
								23.178	0.3115	0.0241	3.6007	0.0341	0.3115
								23.198	0.315	0.0253	3.642	0.0358	0.315
								23.218	0.3182	0.0235	3.6784	0.0333	0.3182
								23.238	0.321	0.0269	3.7103	0.0381	0.3209
								23.258	0.3236	0.0261	3.7411	0.0369	0.3236
								23.278	0.3265	0.0255	3.7741	0.0361	0.3265
								23.298	0.3295	0.0263	3.8092	0.0373	0.3295
								23.318	0.3326	0.0253	3.8452	0.0358	0.3326
								23.338	0.3358	0.0271	3.8824	0.0383	0.3358
								23.358	0.3393	0.0264	3.9218	0.0374	0.3392
								23.378	0.3428	0.0277	3.9632	0.0391	0.3428
								23.398	0.3465	0.0279	4.0055	0.0394	0.3465
								23.418	0.3501	0.0267	4.0468	0.0377	0.35
								23.438	0.3535	0.027	4.0862	0.0382	0.3535
								23.458	0.3568	0.0264	4.1252	0.0373	0.3568
								23.478	0.3604	0.0267	4.1659	0.0378	0.3604
								23.498	0.364	0.0273	4.2078	0.0386	0.364
								23.518	0.3675	0.0234	4.2479	0.0331	0.3674
								23.538	0.3705	0.0257	4.283	0.0364	0.3705
								23.558	0.3731	0.0255	4.3136	0.036	0.3731
								23.578	0.3757	0.0272	4.3437	0.0385	0.3757
								23.598	0.3786	0.0274	4.3762	0.0388	0.3785
								23.618	0.3816	0.0274	4.4112	0.0388	0.3816
								23.638	0.3848	0.0293	4.4482	0.0414	0.3848
								23.658	0.3882	0.0278	4.4876	0.0394	0.3882
								23.678	0.3918	0.0299	4.5298	0.0423	0.3918
								23.698	0.3957	0.0289	4.5745	0.0408	0.3957
								23.718	0.3997	0.0278	4.6202	0.0394	0.3996
								23.738	0.4035	0.03	4.6644	0.0425	0.4035
								23.758	0.4071	0.0287	4.7062	0.0406	0.4071
								23.778	0.4107	0.0298	4.7474	0.0422	0.4106
								23.798	0.4143	0.0282	4.7891	0.0399	0.4143
								23.818	0.4178	0.0287	4.8303	0.0406	0.4178
								23.838	0.4211	0.0304	4.868	0.043	0.4211
								23.858	0.424	0.0287	4.9011	0.0406	0.4239
								23.878	0.4266	0.0312	4.9319	0.0442	0.4266
								23.898	0.4294	0.0318	4.9638	0.0451	0.4294
								23.918	0.4324	0.0306	4.9983	0.0433	0.4324
								23.938	0.4356	0.0322	5.0354	0.0455	0.4356
								23.958	0.439	0.0315	5.0749	0.0446	0.439
								23.978	0.4426	0.032	5.1167	0.0452	0.4426
								23.998	0.4464	0.0307	5.1604	0.0434	0.4464
								24.018	0.4502	0.0308	5.2047	0.0436	0.4502
								24.038	0.4539	0.031	5.2474	0.0439	0.4539
								24.058	0.4573	0.0303	5.2869	0.0429	0.4573
								24.078	0.4606	0.0333	5.3248	0.047	0.4606
								24.098	0.464	0.0329	5.3638	0.0466	0.464
								24.118	0.4675	0.0315	5.4045	0.0446	0.4675
								24.138	0.471	0.0309	5.4446	0.0437	0.471
								24.158	0.4741	0.0299	5.4805	0.0423	0.4741
								24.178	0.4768	0.031	5.5124	0.0438	0.4768
								24.198	0.4795	0.0323	5.5435	0.0457	0.4795
								24.218	0.4824	0.0332	5.5765	0.047	0.4824
								24.238	0.4854	0.0341	5.6119	0.0483	0.4854
								24.258	0.4886	0.0328	5.6485	0.0463	0.4886
								24.278	0.4919	0.0355	5.6869	0.0502	0.4919
								24.298	0.4954	0.0327	5.7273	0.0462	0.4954
								24.318	0.499	0.0336	5.7691	0.0475	0.499
								24.338	0.5027	0.034	5.8117	0.0482	0.5027
								24.358	0.5064	0.0337	5.8541	0.0477	0.5064
								24.378	0.51	0.0344	5.896	0.0487	0.51
								24.398	0.5137	0.0347	5.9385	0.0491	0.5137
								24.418	0.5175	0.0354	5.9828	0.0501	0.5175
								24.438	0.5214	0.0348	6.0274	0.0492	0.5214
								24.458	0.5249	0.0323	6.0682	0.0457	0.5249
								24.478	0.5279	0.0352	6.1031	0.0498	0.5279
								24.498	0.5307	0.0373	6.1346	0.0528	0.5306
								24.518	0.5334	0.0369	6.1661	0.0522	0.5334
								24.538	0.5363	0.0358	6.1995	0.0506	0.5363
								24.558	0.5393	0.0336	6.2341	0.0476	0.5392
								24.578	0.5423	0.036	6.2696	0.051	0.5423
								24.598	0.5456	0.0356	6.3072	0.0504	0.5456
								24.618	0.5491	0.0365	6.3478	0.0516	0.5491
								24.638	0.5528	0.0345	6.3905	0.0488	0.5528
								24.658	0.5565	0.0354	6.4333	0.0501	0.5565
								24.678	0.56	0.0371	6.4739	0.0525	0.56
								24.698	0.5634	0.0365	6.5131	0.0517	0.5634
								24.718	0.5669	0.0374	6.5532	0.0529	0.5669
								24.738	0.5705	0.0382	6.595	0.054	0.5705
								24.758	0.5741	0.0351	6.637	0.0497	0.5741
								24.778	0.5774	0.0363	6.6754	0.0513	0.5774
								24.798	0.5803	0.0367	6.7084	0.0519	0.5803
								24.818	0.5829	0.0397	6.7388	0.0561	0.5829
								24.838	0.5857	0.0392	6.7706	0.0554	0.5857
								24.858	0.5887	0.0375	6.8053	0.0531	0.5887
								24.878	0.5918	0.0392	6.842	0.0554	0.5918
								24.898	0.5952	0.0387	6.8808	0.0547	0.5952
								24.918	0.5988	0.0405	6.9228	0.0573	0.5988
								24.938	0.6027	0.0402	6.9676	0.0568	0.6027
								24.958	0.6067	0.0388	7.0138	0.0549	0.6067
								24.978	0.6107	0.0396	7.0597	0.056	0.6107
								24.998	0.6145	0.0391	7.1034	0.0554	0.6144
								25.018	0.6181	0.0407	7.1452	0.0576	0.6181
								25.038	0.6217	0.0386	7.1866	0.0546	0.6216
								25.058	0.6252	0.038	7.2277	0.0537	0.6252
								25.078	0.6285	0.0383	7.2659	0.0542	0.6285
								25.098	0.6314	0.0396	7.2993	0.056	0.6314
								25.118	0.634	0.0419	7.3293	0.0593	0.634
								25.138	0.6366	0.0422	7.3595	0.0597	0.6366
								25.158	0.6394	0.0413	7.3922	0.0585	0.6394
								25.178	0.6425	0.0412	7.4274	0.0583	0.6425
								25.198	0.6457	0.0399	7.4647	0.0565	0.6457
								25.218	0.6491	0.0419	7.5041	0.0593	0.6491
								25.238	0.6527	0.0421	7.5459	0.0596	0.6527
								25.258	0.6564	0.0411	7.5888	0.0582	0.6564
								25.278	0.6601	0.042	7.6311	0.0594	0.6601
								25.298	0.6635	0.0405	7.6709	0.0573	0.6635
								25.318	0.6668	0.0431	7.7083	0.061	0.6668
								25.338	0.67	0.0421	7.7455	0.0596	0.67
								25.358	0.6733	0.0432	7.7841	0.0611	0.6733
								25.378	0.6768	0.0426	7.8246	0.0602	0.6768
								25.398	0.6803	0.0406	7.8644	0.0575	0.6803
								25.418	0.6834	0.0422	7.9002	0.0598	0.6834
								25.438	0.6862	0.0436	7.9324	0.0617	0.6861
								25.458	0.6889	0.0436	7.9644	0.0617	0.6889
								25.478	0.6919	0.0443	7.9988	0.0627	0.6919
								25.498	0.6951	0.0419	8.0354	0.0593	0.6951
								25.518	0.6984	0.0449	8.0738	0.0635	0.6984
								25.538	0.7019	0.0436	8.1146	0.0616	0.7019
								25.558	0.7056	0.0441	8.1576	0.0624	0.7056
								25.578	0.7095	0.044	8.2018	0.0623	0.7095
								25.598	0.7133	0.0422	8.2461	0.0597	0.7133
								25.618	0.717	0.0448	8.2887	0.0634	0.717
								25.638	0.7206	0.0441	8.3299	0.0624	0.7205
								25.658	0.7241	0.0456	8.3715	0.0644	0.7241
								25.678	0.7278	0.0458	8.4142	0.0647	0.7278
								25.698	0.7315	0.0468	8.456	0.0663	0.7314
								25.718	0.7347	0.0467	8.4936	0.066	0.7347
								25.738	0.7375	0.045	8.5263	0.0637	0.7375
								25.758	0.7402	0.0447	8.5576	0.0633	0.7402
								25.778	0.7431	0.0459	8.5905	0.065	0.7431
								25.798	0.7461	0.0428	8.6256	0.0606	0.7461
								25.818	0.7492	0.0455	8.6615	0.0643	0.7492
								25.838	0.7524	0.0453	8.6986	0.0641	0.7524
								25.858	0.7558	0.0481	8.7378	0.068	0.7558
								25.878	0.7594	0.0479	8.7794	0.0678	0.7594
								25.898	0.7631	0.047	8.8222	0.0665	0.7631
								25.918	0.7668	0.0466	8.8643	0.0659	0.7668
								25.938	0.7702	0.0459	8.9041	0.065	0.7702
								25.958	0.7736	0.0481	8.943	0.0681	0.7736
								25.978	0.777	0.0498	8.983	0.0704	0.777
								25.998	0.7807	0.0479	9.0247	0.0678	0.7806
								26.018	0.7842	0.0481	9.0655	0.0681	0.7842
								26.038	0.7873	0.0466	9.1015	0.0659	0.7873
								26.058	0.79	0.0487	9.1333	0.0689	0.79
								26.078	0.7927	0.0492	9.1644	0.0696	0.7927
								26.098	0.7956	0.0503	9.1971	0.0712	0.7955
								26.118	0.7986	0.052	9.2322	0.0736	0.7986
								26.138	0.8018	0.0489	9.2692	0.0692	0.8018
								26.158	0.8052	0.0512	9.3088	0.0724	0.8052
								26.178	0.8089	0.0509	9.3514	0.072	0.8089
								26.198	0.8128	0.0494	9.3963	0.0699	0.8128
								26.218	0.8168	0.0498	9.4424	0.0704	0.8168
								26.238	0.8206	0.0487	9.4869	0.0689	0.8206
								26.258	0.8243	0.0508	9.5289	0.0718	0.8242
								26.278	0.8278	0.0493	9.5698	0.0698	0.8278
								26.298	0.8314	0.0513	9.6108	0.0725	0.8313
								26.318	0.8348	0.0525	9.651	0.0743	0.8348
								26.338	0.838	0.0513	9.6874	0.0726	0.838
								26.358	0.8407	0.0525	9.7191	0.0743	0.8407
								26.378	0.8433	0.0515	9.7489	0.0728	0.8433
								26.398	0.846	0.0528	9.7802	0.0748	0.846
								26.418	0.849	0.0536	9.8145	0.0759	0.849
								26.438	0.8521	0.0535	9.8511	0.0757	0.8521
								26.458	0.8554	0.0537	9.8894	0.076	0.8554
								26.478	0.859	0.0533	9.93	0.0755	0.8589
								26.498	0.8627	0.0516	9.9728	0.073	0.8626
								26.518	0.8665	0.0523	10.0167	0.0739	0.8664
								26.538	0.8701	0.0508	10.0591	0.0719	0.8701
								26.558	0.8735	0.0543	10.0979	0.0768	0.8735
								26.578	0.8767	0.053	10.135	0.075	0.8767
								26.598	0.88	0.0542	10.1733	0.0767	0.88
								26.618	0.8835	0.0536	10.2136	0.0758	0.8835
								26.638	0.887	0.0537	10.2547	0.076	0.887
								26.658	0.8904	0.0535	10.2933	0.0757	0.8904
								26.678	0.8933	0.0542	10.3276	0.0766	0.8933
								26.698	0.8961	0.0551	10.3598	0.0779	0.8961
								26.718	0.8991	0.0571	10.3935	0.0807	0.899
								26.738	0.9022	0.0554	10.4299	0.0783	0.9022
								26.758	0.9055	0.056	10.4685	0.0792	0.9055
								26.778	0.9091	0.0548	10.5095	0.0775	0.9091
								26.798	0.9129	0.0574	10.5531	0.0812	0.9128
								26.818	0.9167	0.0579	10.5979	0.0819	0.9167
								26.838	0.9206	0.0554	10.6422	0.0784	0.9205
								26.858	0.9243	0.0571	10.685	0.0807	0.9242
								26.878	0.9278	0.056	10.7261	0.0792	0.9278
								26.898	0.9313	0.056	10.7668	0.0793	0.9313
								26.918	0.9349	0.0553	10.8085	0.0782	0.9349
								26.938	0.9385	0.0566	10.85	0.0801	0.9385
								26.958	0.9418	0.0574	10.8879	0.0812	0.9418
								26.978	0.9447	0.0579	10.921	0.0818	0.9447
								26.998	0.9473	0.0572	10.9515	0.081	0.9473
								27.018	0.95	0.0585	10.9826	0.0827	0.95
								27.038	0.9529	0.0574	11.0158	0.0812	0.9529
								27.058	0.9558	0.0593	11.0501	0.0839	0.9558
								27.078	0.9589	0.0579	11.0854	0.0819	0.9589
								27.098	0.9621	0.0598	11.1228	0.0846	0.9621
								27.118	0.9656	0.0586	11.1627	0.0829	0.9656
								27.138	0.9692	0.0582	11.2045	0.0824	0.9692
								27.158	0.9729	0.06	11.2467	0.0849	0.9728
								27.178	0.9764	0.0585	11.2876	0.0828	0.9764
								27.198	0.9798	0.0604	11.3269	0.0854	0.9798
								27.218	0.9832	0.0607	11.3667	0.0859	0.9832
								27.238	0.9868	0.0604	11.4084	0.0854	0.9868
								27.258	0.9905	0.0621	11.4509	0.0878	0.9905
								27.278	0.9939	0.0607	11.49	0.0859	0.9939
								27.298	0.9968	0.0623	11.5236	0.0882	0.9968
								27.318	0.9995	0.0613	11.5545	0.0867	0.9995
								27.338	1.0022	0.0616	11.5861	0.0871	1.0022
								27.358	1.0052	0.0614	11.6205	0.0869	1.0052
								27.378	1.0084	0.0607	11.6573	0.0859	1.0083
								27.398	1.0117	0.0608	11.6961	0.086	1.0117
								27.418	1.0154	0.0616	11.7382	0.0871	1.0153
								27.438	1.0193	0.0625	11.7834	0.0884	1.0193
								27.458	1.0234	0.0629	11.8307	0.0889	1.0234
								27.478	1.0274	0.0631	11.877	0.0893	1.0274
								27.498	1.0311	0.0654	11.9199	0.0925	1.0311
								27.518	1.0346	0.0646	11.9606	0.0915	1.0346
								27.538	1.0381	0.064	12.0008	0.0905	1.0381
								27.558	1.0415	0.0638	12.0409	0.0903	1.0415
								27.578	1.0448	0.0611	12.0785	0.0864	1.0448
								27.598	1.0477	0.0652	12.112	0.0923	1.0477
								27.618	1.0503	0.065	12.1422	0.092	1.0503
								27.638	1.0529	0.0677	12.1723	0.0958	1.0529
								27.658	1.0557	0.0668	12.2047	0.0945	1.0557
								27.678	1.0587	0.0661	12.2396	0.0936	1.0587
								27.698	1.0619	0.0653	12.2766	0.0924	1.0619
								27.718	1.0653	0.0659	12.3158	0.0933	1.0653
								27.738	1.0689	0.0654	12.3572	0.0925	1.0689
								27.758	1.0726	0.0674	12.4001	0.0954	1.0726
								27.778	1.0764	0.0651	12.4436	0.0921	1.0764
								27.798	1.0801	0.0667	12.4861	0.0944	1.08
								27.818	1.0835	0.0648	12.5262	0.0916	1.0835
								27.838	1.0869	0.0663	12.5653	0.0938	1.0869
								27.858	1.0904	0.0667	12.6059	0.0944	1.0904
								27.878	1.0941	0.0662	12.6481	0.0937	1.0941
								27.898	1.0975	0.0668	12.688	0.0945	1.0975
								27.918	1.1006	0.0659	12.7231	0.0933	1.1005
								27.938	1.1033	0.0685	12.7549	0.0969	1.1033
								27.958	1.1061	0.0693	12.787	0.098	1.1061
								27.978	1.1091	0.0699	12.8214	0.0989	1.109
								27.998	1.1122	0.07	12.8579	0.099	1.1122
								28.018	1.1156	0.0709	12.8965	0.1003	1.1155
								28.038	1.1191	0.0714	12.9373	0.101	1.1191
								28.058	1.1228	0.0704	12.9804	0.0996	1.1228
								28.078	1.1266	0.069	13.0245	0.0977	1.1266
								28.098	1.1304	0.0706	13.0677	0.0999	1.1303
								28.118	1.1339	0.0688	13.1084	0.0973	1.1339
								28.138	1.1373	0.0714	13.1479	0.101	1.1373
								28.158	1.1408	0.0708	13.1886	0.1002	1.1408
								28.178	1.1445	0.0701	13.2309	0.0992	1.1445
								28.198	1.1481	0.0705	13.2723	0.0997	1.148
								28.218	1.1512	0.0696	13.3089	0.0984	1.1512
								28.238	1.154	0.0709	13.3408	0.1003	1.154
								28.258	1.1566	0.0728	13.3713	0.103	1.1566
								28.278	1.1594	0.0734	13.4032	0.1039	1.1594
								28.298	1.1623	0.0745	13.437	0.1054	1.1623
								28.318	1.1653	0.0726	13.4719	0.1026	1.1653
								28.338	1.1685	0.0741	13.5085	0.1048	1.1685
								28.358	1.1719	0.0743	13.548	0.1051	1.1719
								28.378	1.1755	0.0741	13.59	0.1049	1.1755
								28.398	1.1793	0.0741	13.6332	0.1048	1.1793
								28.418	1.183	0.0738	13.676	0.1043	1.183
								28.438	1.1865	0.0757	13.7166	0.107	1.1865
								28.458	1.19	0.0759	13.7566	0.1073	1.1899
								28.478	1.1935	0.075	13.7981	0.1061	1.1935
								28.498	1.1972	0.0758	13.8408	0.1072	1.1972
								28.518	1.2008	0.0745	13.882	0.1054	1.2008
								28.538	1.2039	0.0756	13.918	0.107	1.2039
								28.558	1.2067	0.0763	13.95	0.108	1.2067
								28.578	1.2094	0.0753	13.9815	0.1065	1.2094
								28.598	1.2123	0.0769	14.0154	0.1087	1.2123
								28.618	1.2155	0.0755	14.0521	0.1067	1.2155
								28.638	1.2189	0.0762	14.0912	0.1078	1.2189
								28.658	1.2225	0.0765	14.133	0.1083	1.2225
								28.678	1.2263	0.0786	14.1773	0.1112	1.2263
								28.698	1.2303	0.0785	14.2229	0.1111	1.2303
								28.718	1.2342	0.0776	14.2684	0.1097	1.2342
								28.738	1.238	0.0788	14.3117	0.1114	1.238
								28.758	1.2415	0.078	14.3523	0.1103	1.2415
								28.778	1.2449	0.0782	14.3916	0.1106	1.2449
								28.798	1.2483	0.0803	14.431	0.1136	1.2483
								28.818	1.2516	0.0776	14.4697	0.1098	1.2516
								28.838	1.2547	0.0806	14.5052	0.114	1.2547
								28.858	1.2574	0.0793	14.5368	0.1123	1.2574
								28.878	1.26	0.0804	14.5667	0.1137	1.26
								28.898	1.2627	0.0796	14.598	0.1125	1.2627
								28.918	1.2657	0.0812	14.6319	0.1149	1.2657
								28.938	1.2688	0.0829	14.6676	0.1173	1.2687
								28.958	1.272	0.0828	14.7046	0.1172	1.2719
								28.978	1.2754	0.0819	14.7438	0.1159	1.2753
								28.998	1.279	0.0826	14.7858	0.1168	1.279
								29.018	1.2827	0.0829	14.8292	0.1172	1.2827
								29.038	1.2864	0.084	14.8721	0.1189	1.2864
								29.058	1.29	0.0821	14.9126	0.1161	1.2899
								29.078	1.2933	0.0826	14.9515	0.1169	1.2933
								29.098	1.2967	0.0844	14.9907	0.1195	1.2967
								29.118	1.3002	0.0838	15.0316	0.1186	1.3002
								29.138	1.3039	0.084	15.0733	0.1189	1.3038
								29.158	1.3072	0.0808	15.1116	0.1144	1.3072
								29.178	1.3101	0.083	15.1451	0.1174	1.31
								29.198	1.3128	0.0838	15.1766	0.1185	1.3128
								29.218	1.3156	0.0842	15.2093	0.1192	1.3156
								29.238	1.3187	0.0856	15.2447	0.1211	1.3187
								29.258	1.3219	0.0847	15.2822	0.1198	1.3219
								29.278	1.3254	0.0853	15.322	0.1207	1.3253
								29.298	1.329	0.0859	15.3645	0.1216	1.329
								29.318	1.3329	0.0838	15.4091	0.1186	1.3329
								29.338	1.3368	0.0862	15.4543	0.122	1.3368
								29.358	1.3406	0.0854	15.4976	0.1208	1.3405
								29.378	1.3441	0.0881	15.5382	0.1247	1.3441
								29.398	1.3475	0.0867	15.578	0.1226	1.3475
								29.418	1.351	0.086	15.6187	0.1216	1.351
								29.438	1.3546	0.0858	15.6601	0.1214	1.3546
								29.458	1.358	0.0859	15.699	0.1215	1.358
								29.478	1.3609	0.0875	15.733	0.1238	1.3609
								29.498	1.3636	0.0888	15.7637	0.1256	1.3636
								29.518	1.3663	0.0899	15.7949	0.1271	1.3663
								29.538	1.3692	0.0911	15.8287	0.1289	1.3692
								29.558	1.3723	0.0902	15.8643	0.1275	1.3723
								29.578	1.3755	0.0901	15.9012	0.1275	1.3755
								29.598	1.3788	0.0905	15.9397	0.1281	1.3788
								29.618	1.3823	0.0911	15.9805	0.1288	1.3823
								29.638	1.386	0.0919	16.0228	0.13	1.386
								29.658	1.3897	0.0916	16.066	0.1296	1.3897
								29.678	1.3934	0.0922	16.1082	0.1304	1.3934
								29.698	1.3969	0.0936	16.1487	0.1324	1.3969
								29.718	1.4004	0.0934	16.189	0.1321	1.4003
								29.738	1.404	0.0956	16.2306	0.1352	1.4039
								29.758	1.4076	0.0911	16.2726	0.1288	1.4076
								29.778	1.4109	0.0913	16.3112	0.1292	1.4109
								29.798	1.4138	0.0937	16.3448	0.1326	1.4138
								29.818	1.4165	0.0947	16.3762	0.134	1.4165
								29.838	1.4193	0.0954	16.4085	0.135	1.4193
								29.858	1.4223	0.0942	16.443	0.1333	1.4223
								29.878	1.4255	0.0965	16.4796	0.1365	1.4255
								29.898	1.4288	0.095	16.5181	0.1344	1.4288
								29.918	1.4324	0.0945	16.5591	0.1337	1.4324
								29.938	1.4361	0.0953	16.6024	0.1348	1.4361
								29.958	1.44	0.0943	16.6472	0.1333	1.44
								29.978	1.4438	0.0961	16.6912	0.136	1.4438
								29.998	1.4474	0.098	16.7329	0.1386	1.4474
								30.018	1.4509	0.0982	16.7733	0.1389	1.4509
								30.038	1.4544	0.0979	16.8142	0.1385	1.4544
								30.058	1.458	0.096	16.8553	0.1359	1.458
								30.078	1.4613	0.098	16.8939	0.1387	1.4613
								30.098	1.4642	0.0973	16.9275	0.1377	1.4642
								30.118	1.4668	0.0998	16.9575	0.1412	1.4668
								30.138	1.4694	0.1007	16.9872	0.1424	1.4694
								30.158	1.4722	0.0998	17.019	0.1412	1.4721
								30.178	1.4752	0.1002	17.0537	0.1418	1.4751
								30.198	1.4784	0.0996	17.0908	0.141	1.4784
								30.218	1.4818	0.1016	17.13	0.1437	1.4817
								30.238	1.4853	0.1011	17.1714	0.143	1.4853
								30.258	1.489	0.0997	17.2143	0.1411	1.489
								30.278	1.4928	0.1008	17.2581	0.1426	1.4928
								30.298	1.4965	0.1	17.3007	0.1414	1.4965
								30.318	1.5	0.101	17.3409	0.1429	1.5
								30.338	1.5034	0.1036	17.3803	0.1466	1.5034
								30.358	1.507	0.1028	17.4213	0.1454	1.5069
								30.378	1.5106	0.1037	17.4636	0.1467	1.5106
								30.398	1.5141	0.1017	17.5037	0.1439	1.5141
								30.418	1.5172	0.1049	17.5394	0.1484	1.5172
								30.438	1.52	0.1054	17.572	0.1491	1.52
								30.458	1.5229	0.1049	17.6054	0.1484	1.5229
								30.478	1.526	0.1059	17.6412	0.1499	1.526
								30.498	1.5292	0.1042	17.6787	0.1474	1.5292
								30.518	1.5326	0.1052	17.7181	0.1488	1.5326
								30.538	1.5363	0.105	17.7601	0.1485	1.5362
								30.558	1.54	0.1052	17.8037	0.1489	1.54
								30.578	1.5438	0.1088	17.8475	0.1539	1.5438
								30.598	1.5475	0.1078	17.8906	0.1526	1.5475
								30.618	1.5511	0.1091	17.9317	0.1543	1.5511
								30.638	1.5545	0.1081	17.9713	0.1529	1.5545
								30.658	1.558	0.1082	18.0114	0.1531	1.558
								30.678	1.5616	0.1097	18.0526	0.1552	1.5616
								30.698	1.565	0.1075	18.0924	0.1521	1.565
								30.718	1.568	0.1089	18.1272	0.154	1.568
								30.738	1.5706	0.1096	18.1577	0.1551	1.5706
								30.758	1.5732	0.1089	18.1874	0.154	1.5732
								30.778	1.576	0.1106	18.2193	0.1564	1.576
								30.798	1.5789	0.1102	18.2535	0.156	1.5789
								30.818	1.582	0.1122	18.2888	0.1587	1.582
								30.838	1.5852	0.1106	18.3254	0.1565	1.5851
								30.858	1.5885	0.1124	18.364	0.159	1.5885
								30.878	1.592	0.1123	18.4051	0.1588	1.592
								30.898	1.5958	0.1113	18.4481	0.1574	1.5958
								30.918	1.5995	0.1122	18.4916	0.1587	1.5995
								30.938	1.6032	0.1125	18.5334	0.1591	1.6031
								30.958	1.6066	0.1143	18.5738	0.1617	1.6066
								30.978	1.6102	0.1161	18.6148	0.1642	1.6102
								30.998	1.6139	0.1152	18.6573	0.163	1.6138
								31.018	1.6175	0.1161	18.6992	0.1642	1.6175
								31.038	1.6207	0.1138	18.7363	0.161	1.6207
								31.058	1.6235	0.1152	18.7686	0.163	1.6235
								31.078	1.6262	0.1182	18.7996	0.1673	1.6262
								31.098	1.629	0.1156	18.8324	0.1636	1.629
								31.118	1.6321	0.1188	18.8678	0.1681	1.6321
								31.138	1.6353	0.1167	18.9055	0.1652	1.6353
								31.158	1.6388	0.1196	18.946	0.1692	1.6388
								31.178	1.6426	0.1197	18.9896	0.1694	1.6426
								31.198	1.6465	0.1192	19.035	0.1686	1.6465
								31.218	1.6504	0.1187	19.0799	0.1679	1.6504
								31.238	1.6541	0.1182	19.122	0.1672	1.654
								31.258	1.6575	0.1191	19.1616	0.1684	1.6575
								31.278	1.6609	0.1194	19.2015	0.1689	1.6609
								31.298	1.6645	0.1184	19.2423	0.1675	1.6645
								31.318	1.6679	0.1209	19.2821	0.1711	1.6679
								31.338	1.671	0.1191	19.318	0.1685	1.671
								31.358	1.6738	0.1222	19.3497	0.1729	1.6737
								31.378	1.6763	0.1233	19.3795	0.1744	1.6763
								31.398	1.679	0.1228	19.4107	0.1737	1.679
								31.418	1.682	0.1263	19.445	0.1787	1.682
								31.438	1.6852	0.1243	19.4819	0.1758	1.6852
								31.458	1.6885	0.1248	19.5205	0.1765	1.6885
								31.478	1.692	0.1244	19.5609	0.176	1.692
								31.498	1.6957	0.1268	19.6035	0.1794	1.6957
								31.518	1.6996	0.1267	19.6481	0.1792	1.6996
								31.538	1.7034	0.1264	19.6926	0.1788	1.7034
								31.558	1.707	0.1266	19.7344	0.1792	1.707
								31.578	1.7105	0.1263	19.7739	0.1787	1.7104
								31.598	1.7139	0.1264	19.8137	0.1788	1.7139
								31.618	1.7175	0.1282	19.8549	0.1814	1.7174
								31.638	1.721	0.1265	19.8958	0.1789	1.721
								31.658	1.7242	0.1281	19.9331	0.1813	1.7242
								31.678	1.7271	0.1265	19.966	0.179	1.7271
								31.698	1.7298	0.1284	19.9975	0.1816	1.7298
								31.7	1.7301	0.1282	20.0008	0.1813	1.7301
								31.701	1.7302	0.1281	20.0024	0.1812	1.7302
								31.702	1.7304	0.128	20.004	0.1811	1.7303
								31.722	1.7332	0.1266	20.0364	0.1791	1.7331
								31.742	1.7349	0.1241	20.0571	0.1755	1.7349
								31.762	1.7353	0.1277	20.0614	0.1806	1.7353
								31.782	1.735	0.1291	20.058	0.1827	1.735
								31.802	1.7345	0.1271	20.0524	0.1798	1.7345
								31.822	1.734	0.1296	20.046	0.1834	1.734
								31.842	1.7334	0.1269	20.0386	0.1795	1.7333
								31.862	1.7324	0.1278	20.0279	0.1808	1.7324
								31.882	1.7311	0.1255	20.0131	0.1775	1.7311
								31.902	1.7294	0.1239	19.9927	0.1753	1.7294
								31.922	1.7269	0.1246	19.9636	0.1763	1.7268
								31.942	1.7238	0.1254	19.9282	0.1774	1.7238
								31.962	1.7208	0.1232	19.8931	0.1743	1.7207
								31.982	1.7177	0.1229	19.858	0.1739	1.7177
								32.002	1.7145	0.1218	19.8211	0.1724	1.7145
								32.022	1.7111	0.1211	19.7818	0.1713	1.7111
								32.042	1.7076	0.1176	19.7404	0.1663	1.7075
								32.062	1.7039	0.1175	19.6983	0.1662	1.7039
								32.082	1.7003	0.1157	19.6571	0.1638	1.7003
								32.102	1.6968	0.1141	19.6164	0.1614	1.6968
								32.122	1.6932	0.1152	19.5748	0.1629	1.6932
								32.142	1.6896	0.1128	19.5332	0.1596	1.6896
								32.162	1.6863	0.1131	19.4949	0.1601	1.6863
								32.182	1.6835	0.1101	19.462	0.1557	1.6835
								32.202	1.6808	0.1103	19.4315	0.156	1.6808
								32.222	1.6781	0.1101	19.3998	0.1558	1.6781
								32.242	1.6752	0.1073	19.3658	0.1519	1.6751
								32.262	1.6721	0.1066	19.3303	0.1509	1.6721
								32.282	1.6689	0.1071	19.2936	0.1515	1.6689
								32.302	1.6656	0.1053	19.2552	0.149	1.6656
								32.322	1.6621	0.1061	19.2146	0.1501	1.6621
								32.342	1.6584	0.1023	19.1721	0.1448	1.6584
								32.362	1.6546	0.1032	19.1281	0.146	1.6546
								32.382	1.6509	0.1028	19.085	0.1454	1.6508
								32.402	1.6473	0.1027	19.0436	0.1453	1.6473
								32.422	1.6437	0.1023	19.0024	0.1447	1.6437
								32.442	1.64	0.0996	18.9597	0.1409	1.64
								32.462	1.6363	0.1009	18.9171	0.1428	1.6363
								32.482	1.633	0.098	18.878	0.1387	1.6329
								32.502	1.63	0.0974	18.8437	0.1378	1.63
								32.522	1.6272	0.0966	18.8118	0.1367	1.6272
								32.542	1.6244	0.0936	18.7792	0.1324	1.6244
								32.562	1.6214	0.0932	18.7445	0.1319	1.6214
								32.582	1.6182	0.0928	18.7076	0.1313	1.6182
								32.602	1.6148	0.0935	18.6682	0.1323	1.6148
								32.622	1.6111	0.0951	18.6256	0.1345	1.6111
								32.642	1.6073	0.0933	18.5813	0.132	1.6073
								32.662	1.6035	0.0939	18.5371	0.1328	1.6035
								32.682	1.5998	0.091	18.4945	0.1288	1.5998
								32.702	1.5963	0.0914	18.4543	0.1294	1.5963
								32.722	1.5929	0.0892	18.415	0.1261	1.5929
								32.742	1.5895	0.087	18.3753	0.1231	1.5895
								32.762	1.5861	0.0885	18.3357	0.1253	1.586
								32.782	1.5828	0.0876	18.2986	0.124	1.5828
								32.802	1.58	0.0876	18.2653	0.124	1.5799
								32.822	1.5773	0.0862	18.2347	0.1219	1.5773
								32.842	1.5746	0.0843	18.2037	0.1192	1.5746
								32.862	1.5718	0.0851	18.1705	0.1204	1.5717
								32.882	1.5687	0.0841	18.1346	0.1189	1.5686
								32.902	1.5654	0.0848	18.0968	0.12	1.5654
								32.922	1.5619	0.0852	18.0568	0.1205	1.5619
								32.942	1.5583	0.084	18.0145	0.1189	1.5582
								32.962	1.5544	0.0857	17.9703	0.1212	1.5544
								32.982	1.5506	0.0836	17.9255	0.1183	1.5506
								33.002	1.5468	0.0833	17.882	0.1178	1.5468
								33.022	1.5432	0.0828	17.8405	0.1172	1.5432
								33.042	1.5396	0.0802	17.7992	0.1135	1.5396
								33.062	1.536	0.0803	17.7569	0.1136	1.536
								33.082	1.5323	0.08	17.7149	0.1131	1.5323
								33.102	1.529	0.0808	17.6767	0.1144	1.529
								33.122	1.5262	0.079	17.6434	0.1118	1.5261
								33.142	1.5235	0.0779	17.6122	0.1103	1.5235
								33.162	1.5207	0.0783	17.5798	0.1108	1.5206
								33.182	1.5176	0.0768	17.5447	0.1087	1.5176
								33.202	1.5144	0.0769	17.5077	0.1089	1.5144
								33.222	1.5111	0.0771	17.4689	0.1091	1.5111
								33.242	1.5076	0.0769	17.4285	0.1087	1.5076
								33.262	1.504	0.0768	17.3868	0.1087	1.504
								33.282	1.5003	0.0755	17.3442	0.1069	1.5003
								33.302	1.4967	0.076	17.3023	0.1075	1.4966
								33.322	1.4932	0.0755	17.2622	0.1068	1.4932
								33.342	1.4898	0.0734	17.223	0.1038	1.4898
								33.362	1.4864	0.0748	17.1832	0.1058	1.4863
								33.382	1.4828	0.0706	17.1424	0.0999	1.4828
								33.402	1.4794	0.0741	17.1028	0.1049	1.4794
								33.422	1.4763	0.0735	17.0671	0.1039	1.4763
								33.442	1.4736	0.0715	17.0352	0.1011	1.4735
								33.462	1.4709	0.0693	17.0042	0.098	1.4709
								33.482	1.468	0.0691	16.9715	0.0977	1.468
								33.502	1.465	0.0702	16.9366	0.0993	1.465
								33.522	1.4619	0.07	16.9003	0.099	1.4619
								33.542	1.4586	0.0695	16.862	0.0983	1.4586
								33.562	1.455	0.0697	16.8211	0.0986	1.455
								33.582	1.4513	0.0678	16.7774	0.0959	1.4512
								33.602	1.4474	0.0702	16.7324	0.0994	1.4473
								33.622	1.4435	0.0686	16.6879	0.0971	1.4435
								33.642	1.4398	0.0683	16.6454	0.0966	1.4398
								33.662	1.4362	0.0685	16.6035	0.0969	1.4362
								33.682	1.4325	0.0675	16.5607	0.0954	1.4325
								33.702	1.4288	0.0699	16.5177	0.0989	1.4288
								33.722	1.4254	0.0666	16.4781	0.0942	1.4254
								33.742	1.4224	0.0657	16.444	0.093	1.4224
								33.762	1.4198	0.0666	16.4133	0.0942	1.4197
								33.782	1.4171	0.0656	16.3822	0.0928	1.4171
								33.802	1.4141	0.0655	16.3483	0.0927	1.4141
								33.822	1.411	0.0653	16.3123	0.0924	1.411
								33.842	1.4078	0.0648	16.2745	0.0917	1.4077
								33.862	1.4043	0.0653	16.2347	0.0924	1.4043
								33.882	1.4007	0.0638	16.193	0.0903	1.4007
								33.902	1.397	0.0662	16.1499	0.0937	1.397
								33.922	1.3932	0.065	16.1067	0.0919	1.3932
								33.942	1.3897	0.0641	16.0653	0.0907	1.3896
								33.962	1.3862	0.0618	16.0256	0.0874	1.3862
								33.982	1.3828	0.0612	15.9857	0.0866	1.3828
								34.002	1.3793	0.0634	15.9455	0.0896	1.3793
								34.022	1.376	0.0629	15.9069	0.089	1.3759
								34.042	1.3729	0.0633	15.8719	0.0895	1.3729
								34.062	1.3702	0.0614	15.8406	0.0869	1.3702
								34.082	1.3676	0.0605	15.8104	0.0855	1.3676
								34.102	1.3648	0.0611	15.7783	0.0864	1.3648
								34.122	1.3618	0.0595	15.7434	0.0841	1.3618
								34.142	1.3586	0.0613	15.7064	0.0867	1.3586
								34.162	1.3553	0.0588	15.6676	0.0832	1.3552
								34.182	1.3517	0.0587	15.6266	0.083	1.3517
								34.202	1.348	0.0603	15.5837	0.0853	1.348
								34.222	1.3441	0.059	15.5391	0.0835	1.3441
								34.242	1.3403	0.06	15.4951	0.0848	1.3403
								34.262	1.3367	0.0589	15.4533	0.0833	1.3367
								34.282	1.3332	0.0591	15.4128	0.0837	1.3332
								34.302	1.3297	0.0602	15.3716	0.0852	1.3296
								34.322	1.326	0.058	15.3292	0.082	1.326
								34.342	1.3225	0.0598	15.2884	0.0846	1.3224
								34.362	1.3193	0.0588	15.2521	0.0832	1.3193
								34.382	1.3165	0.0562	15.22	0.0796	1.3165
								34.402	1.3138	0.0566	15.1884	0.08	1.3138
								34.422	1.3109	0.0541	15.1548	0.0765	1.3109
								34.442	1.3078	0.0545	15.1193	0.0771	1.3078
								34.462	1.3046	0.0544	15.0821	0.0769	1.3046
								34.482	1.3012	0.0551	15.0426	0.078	1.3012
								34.502	1.2976	0.0546	15.0006	0.0773	1.2976
								34.522	1.2938	0.0543	14.9574	0.0768	1.2938
								34.542	1.2901	0.0551	14.9138	0.078	1.29
								34.562	1.2864	0.0548	14.872	0.0776	1.2864
								34.582	1.283	0.0537	14.8326	0.0759	1.283
								34.602	1.2797	0.0545	14.7937	0.0771	1.2797
								34.622	1.2762	0.0521	14.7539	0.0737	1.2762
								34.642	1.2727	0.057	14.7135	0.0807	1.2727
								34.662	1.2694	0.0539	14.6753	0.0763	1.2694
								34.682	1.2665	0.0542	14.6413	0.0767	1.2665
								34.702	1.2638	0.0528	14.6098	0.0746	1.2637
								34.722	1.261	0.0507	14.5777	0.0717	1.261
								34.742	1.258	0.0516	14.5432	0.0731	1.258
								34.762	1.2549	0.0491	14.507	0.0695	1.2549
								34.782	1.2516	0.0507	14.4696	0.0717	1.2516
								34.802	1.2482	0.0514	14.4298	0.0727	1.2482
								34.822	1.2445	0.0499	14.3872	0.0706	1.2445
								34.842	1.2407	0.0506	14.3427	0.0716	1.2406
								34.862	1.2368	0.0496	14.2986	0.0701	1.2368
								34.882	1.2332	0.0499	14.2563	0.0705	1.2332
								34.902	1.2296	0.0505	14.2151	0.0714	1.2296
								34.922	1.226	0.0479	14.173	0.0678	1.226
								34.942	1.2222	0.051	14.1299	0.0722	1.2222
								34.962	1.2186	0.0517	14.0882	0.0731	1.2186
								34.982	1.2155	0.0535	14.0518	0.0756	1.2155
								35.002	1.2128	0.05	14.0208	0.0707	1.2128
								35.022	1.2102	0.0482	13.9908	0.0682	1.2102
								35.042	1.2074	0.049	13.9585	0.0693	1.2074
								35.062	1.2044	0.0476	13.9235	0.0674	1.2044
								35.082	1.2012	0.0473	13.8863	0.0669	1.2012
								35.102	1.1978	0.0484	13.8475	0.0684	1.1978
								35.122	1.1943	0.0477	13.807	0.0675	1.1943
								35.142	1.1907	0.0475	13.7651	0.0672	1.1907
								35.162	1.187	0.0459	13.7221	0.0649	1.187
								35.182	1.1833	0.0476	13.6794	0.0674	1.1833
								35.202	1.1798	0.0467	13.6387	0.0661	1.1797
								35.222	1.1763	0.0444	13.5992	0.0629	1.1763
								35.242	1.1729	0.044	13.5596	0.0622	1.1729
								35.262	1.1695	0.045	13.5197	0.0637	1.1694
								35.282	1.1662	0.0473	13.4815	0.067	1.1661
								35.302	1.1632	0.046	13.4472	0.0651	1.1632
								35.322	1.1605	0.0441	13.4162	0.0624	1.1605
								35.342	1.1578	0.0461	13.3854	0.0652	1.1578
								35.362	1.155	0.0445	13.352	0.0629	1.1549
								35.382	1.1518	0.0453	13.316	0.064	1.1518
								35.402	1.1485	0.0459	13.2775	0.065	1.1485
								35.422	1.145	0.046	13.2367	0.0651	1.145
								35.442	1.1413	0.0463	13.1935	0.0656	1.1412
								35.462	1.1374	0.044	13.1484	0.0623	1.1373
								35.482	1.1334	0.0443	13.1027	0.0627	1.1334
								35.502	1.1296	0.042	13.059	0.0594	1.1296
								35.522	1.1261	0.041	13.018	0.058	1.1261
								35.542	1.1226	0.0422	12.9775	0.0597	1.1225
								35.562	1.119	0.042	12.9364	0.0594	1.119
								35.582	1.1155	0.0447	12.8956	0.0633	1.1155
								35.602	1.1122	0.0432	12.858	0.0611	1.1122
								35.622	1.1094	0.0421	12.8247	0.0595	1.1093
								35.642	1.1066	0.0415	12.7931	0.0587	1.1066
								35.662	1.1038	0.0395	12.7601	0.0558	1.1037
								35.682	1.1007	0.043	12.7247	0.0608	1.1007
								35.702	1.0975	0.0407	12.6877	0.0576	1.0975
								35.722	1.0942	0.0401	12.6493	0.0567	1.0942
								35.742	1.0907	0.041	12.6092	0.0581	1.0907
								35.762	1.0871	0.0424	12.5681	0.06	1.0871
								35.782	1.0835	0.0424	12.5261	0.0599	1.0835
								35.802	1.0799	0.041	12.4846	0.0581	1.0799
								35.822	1.0765	0.04	12.4445	0.0566	1.0764
								35.842	1.073	0.0391	12.4049	0.0554	1.073
								35.862	1.0695	0.0378	12.364	0.0535	1.0695
								35.882	1.0659	0.0395	12.3225	0.0559	1.0659
								35.902	1.0625	0.0385	12.2835	0.0545	1.0625
								35.922	1.0596	0.0406	12.2494	0.0575	1.0596
								35.942	1.0569	0.0387	12.2189	0.0547	1.0569
								35.962	1.0543	0.0379	12.1883	0.0536	1.0543
								35.982	1.0515	0.0391	12.1557	0.0554	1.0515
								36.002	1.0485	0.0382	12.1209	0.0541	1.0485
								36.022	1.0453	0.0383	12.0847	0.0541	1.0453
								36.042	1.042	0.0376	12.0466	0.0532	1.042
								36.062	1.0385	0.0379	12.0062	0.0536	1.0385
								36.082	1.0348	0.039	11.9633	0.0552	1.0348
								36.102	1.0309	0.0395	11.9184	0.0559	1.0309
								36.122	1.0271	0.0393	11.8737	0.0556	1.0271
								36.142	1.0234	0.0386	11.8307	0.0547	1.0234
								36.162	1.0197	0.0357	11.7882	0.0506	1.0197
								36.182	1.0159	0.0372	11.7446	0.0526	1.0159
								36.202	1.0121	0.0356	11.7007	0.0503	1.0121
								36.222	1.0087	0.0382	11.6609	0.054	1.0087
								36.242	1.0058	0.0387	11.6275	0.0548	1.0058
								36.262	1.0032	0.0362	11.5977	0.0513	1.0032
								36.282	1.0006	0.0363	11.567	0.0513	1.0005
								36.302	0.9976	0.0337	11.5333	0.0476	0.9976
								36.322	0.9945	0.0353	11.4973	0.0499	0.9945
								36.342	0.9912	0.0351	11.4593	0.0496	0.9912
								36.362	0.9878	0.0345	11.4195	0.0488	0.9878
								36.382	0.9842	0.0351	11.3779	0.0496	0.9842
								36.402	0.9805	0.0339	11.3348	0.048	0.9805
								36.422	0.9767	0.0372	11.2914	0.0527	0.9767
								36.442	0.9731	0.0358	11.2496	0.0507	0.9731
								36.462	0.9696	0.0341	11.2096	0.0483	0.9696
								36.482	0.9662	0.0347	11.1703	0.0491	0.9662
								36.502	0.9628	0.0341	11.1309	0.0482	0.9628
								36.522	0.9594	0.0376	11.0918	0.0532	0.9594
								36.542	0.9563	0.0372	11.0556	0.0526	0.9563
								36.562	0.9535	0.0348	11.0232	0.0493	0.9535
								36.582	0.9508	0.0339	10.9921	0.048	0.9508
								36.602	0.948	0.032	10.9596	0.0453	0.948
								36.622	0.9449	0.0354	10.9241	0.0501	0.9449
								36.642	0.9417	0.0336	10.8864	0.0475	0.9417
								36.662	0.9383	0.0332	10.8467	0.047	0.9382
								36.682	0.9346	0.0331	10.8042	0.0468	0.9346
								36.702	0.9307	0.0323	10.7595	0.0457	0.9307
								36.722	0.9268	0.034	10.7139	0.0481	0.9268
								36.742	0.923	0.0333	10.67	0.0472	0.923
								36.762	0.9194	0.0333	10.6288	0.0471	0.9194
								36.782	0.9159	0.033	10.5885	0.0466	0.9159
								36.802	0.9123	0.0319	10.5472	0.0451	0.9123
								36.822	0.9087	0.0339	10.5054	0.0479	0.9087
								36.842	0.9053	0.0345	10.4657	0.0488	0.9053
								36.862	0.9023	0.0334	10.4309	0.0473	0.9023
								36.882	0.8996	0.0343	10.3998	0.0485	0.8996
								36.902	0.8969	0.0313	10.3686	0.0442	0.8969
								36.922	0.894	0.0329	10.3351	0.0465	0.894
								36.942	0.8909	0.0306	10.2996	0.0432	0.8909
								36.962	0.8877	0.0323	10.2626	0.0456	0.8877
								36.982	0.8844	0.0307	10.2242	0.0434	0.8844
								37.002	0.881	0.0305	10.1843	0.0431	0.8809
								37.022	0.8774	0.0313	10.1428	0.0443	0.8773
								37.042	0.8737	0.0307	10.1006	0.0435	0.8737
								37.062	0.8702	0.0302	10.0598	0.0427	0.8702
								37.082	0.8668	0.0307	10.0207	0.0434	0.8668
								37.102	0.8634	0.0285	9.9819	0.0403	0.8634
								37.122	0.86	0.0296	9.9416	0.0418	0.8599
								37.142	0.8564	0.0301	9.9003	0.0426	0.8564
								37.162	0.853	0.0311	9.8614	0.044	0.853
								37.182	0.85	0.03	9.8267	0.0424	0.85
								37.202	0.8473	0.0284	9.7947	0.0402	0.8472
								37.222	0.8444	0.0285	9.762	0.0403	0.8444
								37.242	0.8414	0.0273	9.7271	0.0386	0.8414
								37.262	0.8383	0.03	9.6907	0.0424	0.8382
								37.282	0.835	0.0283	9.6531	0.04	0.835
								37.302	0.8315	0.0279	9.613	0.0394	0.8315
								37.322	0.8278	0.0284	9.57	0.0402	0.8278
								37.342	0.8239	0.0277	9.5248	0.0391	0.8239
								37.362	0.82	0.0282	9.4793	0.0399	0.82
								37.382	0.8162	0.0301	9.4358	0.0426	0.8162
								37.402	0.8126	0.0294	9.3941	0.0416	0.8126
								37.422	0.809	0.0278	9.3519	0.0393	0.8089
								37.442	0.8052	0.0259	9.309	0.0366	0.8052
								37.462	0.8017	0.0301	9.2683	0.0426	0.8017
								37.482	0.7987	0.0288	9.2331	0.0407	0.7987
								37.502	0.796	0.0254	9.2026	0.0359	0.796
								37.522	0.7935	0.0267	9.1731	0.0377	0.7935
								37.542	0.7907	0.025	9.1413	0.0353	0.7907
								37.562	0.7878	0.0261	9.1068	0.0369	0.7877
								37.582	0.7846	0.0258	9.0703	0.0365	0.7846
								37.602	0.7812	0.0264	9.0316	0.0374	0.7812
								37.622	0.7777	0.0291	8.9906	0.0411	0.7777
								37.642	0.774	0.0275	8.9478	0.0389	0.774
								37.662	0.7702	0.0296	8.9042	0.0419	0.7702
								37.682	0.7666	0.0269	8.862	0.038	0.7666
								37.702	0.7631	0.0267	8.8221	0.0378	0.7631
								37.722	0.7598	0.0274	8.7831	0.0387	0.7597
								37.742	0.7563	0.0259	8.7433	0.0366	0.7563
								37.762	0.7528	0.0285	8.7031	0.0403	0.7528
								37.782	0.7495	0.028	8.665	0.0396	0.7495
								37.802	0.7466	0.0295	8.6314	0.0417	0.7466
								37.822	0.744	0.028	8.6008	0.0396	0.744
								37.842	0.7413	0.0251	8.5696	0.0355	0.7413
								37.862	0.7384	0.0267	8.5359	0.0378	0.7384
								37.882	0.7352	0.0262	8.4994	0.0371	0.7352
								37.902	0.7319	0.0252	8.4607	0.0356	0.7319
								37.922	0.7283	0.0245	8.4197	0.0347	0.7283
								37.942	0.7246	0.0238	8.3764	0.0337	0.7246
								37.962	0.7207	0.0273	8.3316	0.0387	0.7207
								37.982	0.7168	0.026	8.2864	0.0367	0.7168
								38.002	0.7131	0.0273	8.2434	0.0386	0.7131
								38.022	0.7096	0.0248	8.2037	0.0351	0.7096
								38.042	0.7063	0.0239	8.1655	0.0338	0.7063
								38.062	0.7029	0.0246	8.1259	0.0348	0.7029
								38.082	0.6994	0.0257	8.085	0.0364	0.6993
								38.102	0.696	0.0257	8.0463	0.0364	0.696
								38.122	0.693	0.0244	8.0114	0.0345	0.693
								38.142	0.6902	0.0228	7.9788	0.0323	0.6902
								38.162	0.6873	0.0252	7.9458	0.0356	0.6873
								38.182	0.6844	0.0224	7.9114	0.0317	0.6843
								38.202	0.6812	0.0247	7.8755	0.035	0.6812
								38.222	0.678	0.0246	7.8376	0.0348	0.6779
								38.242	0.6745	0.0242	7.7976	0.0342	0.6745
								38.262	0.6709	0.0244	7.7561	0.0345	0.6709
								38.282	0.6673	0.0229	7.7143	0.0324	0.6673
								38.302	0.6637	0.0241	7.6729	0.0341	0.6637
								38.322	0.6603	0.022	7.6331	0.0312	0.6603
								38.342	0.6569	0.0237	7.5944	0.0336	0.6569
								38.362	0.6535	0.0235	7.5549	0.0333	0.6535
								38.382	0.6499	0.0232	7.5137	0.0329	0.6499
								38.402	0.6464	0.0236	7.4724	0.0334	0.6464
								38.422	0.6431	0.0219	7.4343	0.031	0.6431
								38.442	0.6401	0.0215	7.4004	0.0305	0.6401
								38.462	0.6373	0.0215	7.3677	0.0305	0.6373
								38.482	0.6344	0.0208	7.3338	0.0295	0.6344
								38.502	0.6313	0.0215	7.2981	0.0304	0.6313
								38.522	0.6281	0.0207	7.2607	0.0293	0.628
								38.542	0.6246	0.0211	7.2211	0.0299	0.6246
								38.562	0.621	0.0219	7.179	0.031	0.621
								38.582	0.6172	0.0205	7.1346	0.0289	0.6171
								38.602	0.6132	0.0218	7.0893	0.0308	0.6132
								38.622	0.6094	0.0207	7.0452	0.0293	0.6094
								38.642	0.6058	0.0196	7.0031	0.0277	0.6058
								38.662	0.6022	0.0205	6.9614	0.029	0.6022
								38.682	0.5985	0.02	6.9191	0.0282	0.5985
								38.702	0.5949	0.023	6.8777	0.0325	0.5949
								38.722	0.5917	0.0232	6.8407	0.0328	0.5917
								38.742	0.589	0.0219	6.8092	0.031	0.589
								38.762	0.5865	0.0203	6.7802	0.0288	0.5865
								38.782	0.5839	0.0183	6.75	0.0259	0.5839
								38.802	0.581	0.0201	6.717	0.0285	0.581
								38.822	0.578	0.0197	6.6815	0.0279	0.578
								38.842	0.5748	0.0206	6.6446	0.0292	0.5748
								38.862	0.5714	0.0209	6.606	0.0296	0.5714
								38.882	0.5679	0.0192	6.5654	0.0271	0.5679
								38.902	0.5642	0.0195	6.523	0.0276	0.5642
								38.922	0.5605	0.0186	6.4793	0.0263	0.5605
								38.942	0.5568	0.0209	6.4367	0.0295	0.5568
								38.962	0.5533	0.0221	6.3961	0.0313	0.5533
								38.982	0.5498	0.0202	6.3563	0.0286	0.5498
								39.002	0.5464	0.0194	6.3163	0.0275	0.5464
								39.022	0.543	0.0206	6.277	0.0291	0.543
								39.042	0.5398	0.0241	6.2403	0.0341	0.5398
								39.062	0.5369	0.023	6.2072	0.0325	0.5369
								39.082	0.5342	0.0211	6.1757	0.0298	0.5342
								39.102	0.5314	0.021	6.1428	0.0297	0.5313
								39.122	0.5283	0.0211	6.1073	0.0298	0.5283
								39.142	0.525	0.02	6.0693	0.0283	0.525
								39.162	0.5215	0.0191	6.0286	0.027	0.5215
								39.182	0.5177	0.0163	5.9851	0.0231	0.5177
								39.202	0.5138	0.0187	5.9396	0.0265	0.5138
								39.222	0.5098	0.0189	5.8933	0.0268	0.5098
								39.242	0.506	0.0208	5.8491	0.0295	0.5059
								39.262	0.5024	0.018	5.8081	0.0255	0.5024
								39.282	0.499	0.0175	5.7684	0.0247	0.499
								39.302	0.4955	0.0185	5.7282	0.0262	0.4955
								39.322	0.492	0.019	5.6882	0.0269	0.492
								39.342	0.4888	0.0202	5.6506	0.0285	0.4888
								39.362	0.4859	0.0192	5.6174	0.0272	0.4859
								39.382	0.4833	0.0179	5.587	0.0253	0.4833
								39.402	0.4806	0.0193	5.5564	0.0273	0.4806
								39.422	0.4778	0.0178	5.5237	0.0252	0.4778
								39.442	0.4748	0.0176	5.4885	0.0249	0.4748
								39.462	0.4715	0.0183	5.4511	0.0259	0.4715
								39.482	0.4681	0.0171	5.4116	0.0242	0.4681
								39.502	0.4645	0.0182	5.3702	0.0257	0.4645
								39.522	0.4608	0.0167	5.3275	0.0236	0.4608
								39.542	0.4571	0.0187	5.2842	0.0265	0.4571
								39.562	0.4534	0.0188	5.2417	0.0266	0.4534
								39.582	0.4499	0.0199	5.2011	0.0282	0.4499
								39.602	0.4464	0.0191	5.1605	0.0271	0.4464
								39.622	0.4428	0.0177	5.119	0.0251	0.4428
								39.642	0.4392	0.02	5.0776	0.0283	0.4392
								39.662	0.4359	0.0177	5.0393	0.025	0.4359
								39.682	0.433	0.0163	5.0057	0.0231	0.433
								39.702	0.4303	0.0168	4.9746	0.0238	0.4303
								39.722	0.4275	0.0161	4.9425	0.0228	0.4275
								39.742	0.4246	0.0185	4.9081	0.0262	0.4246
								39.762	0.4215	0.0165	4.8724	0.0233	0.4215
								39.782	0.4182	0.0157	4.8351	0.0222	0.4182
[truncated: 111,046 more rows]

## Sheet: Figure 2
Part (a)		Conductivity (S/m)	error	Part (b)	Sample	SER	Error	SEA	Error	SET	Error	Part (c)	Sample	R	Error	A	Error	Part (d)		2 mm 0.5 wt%	4 mm 0.5 wt%	6 mm 0.5 wt%	2 mm 1 wt%	4 mm 1 wt%	6 mm 1 wt%	Part (e)		SER	Error	SEA	Error	SET	Error	Part (f)		Small	Large	Part (g)		R	Error	A	Error	Part (h)	EMI SE	A
	rGO	11.4367	0.0493288		2 mm-0.5 wt%	2.28181	0.00258115	16.9224	0.00303837	19.2043	0.000466066		2 mm-0.5 wt%	0.405571	0.000329056	0.582353	0.000330679		Frequency (GHz)	SET	SET	SET	SET	SET	SET		Small Filament	1.38487	0.00103166	57.9449	0.0225677	59.3298	0.0215361		Frequency (GHz)	SET	SET		Small Filament	0.269718	0.000185011	0.730281	0.000185017		38.4	0.41
	rGO-CNF	35.63	0.04		4 mm-0.5 wt%	1.62776	0.000217905	27.4154	0.000214755	29.0432	0.000122103		4 mm-0.5 wt%	0.309235	3.43706e-05	0.689483	3.43403e-05		8.2	19.0444	27.8822	30.1677	24.6042	43.1334	56.6573		Large Filament	3.91922	0.000643211	59.4732	0.0190551	63.3924	0.018799		8.2	56.6573	59.8633		Large Filament	0.592542	7.0093e-05	0.407458	7.00925e-05		50.5	0.11
					6 mm-0.5 wt%	1.60762	0.00532301	29.7604	0.0130628	31.368	0.00773978		6 mm-0.5 wt%	0.307474	0.000803857	0.691778	0.000805289		8.2105	19.011	27.8567	30.1638	24.5832	43.0376	56.2256										8.2105	56.2256	59.5947								44	0.32
					2 mm-1.0 wt%	1.62078	0.00148235	23.9194	0.00472212	25.5402	0.00325075		2 mm-1.0 wt%	0.30909	0.000224521	0.688058	0.000226627		8.221	18.9663	27.8351	30.1424	24.5573	43.1144	56.5349										8.221	56.5349	59.6214								70.1	0.09
					4 mm-1.0 wt%	1.43069	6.6153e-05	44.1945	0.0100736	45.6252	0.0101392		4 mm-1.0 wt%	0.277504	1.0241e-05	0.722467	1.01597e-05		8.2315	18.9271	27.8188	30.1069	24.5358	43.063	56.4861										8.2315	56.4861	60.0784								31.2	0.26
					6 mm-1.0 wt%	1.38487	0.00103166	57.9449	0.0225677	59.3298	0.0215361		6 mm-1.0 wt%	0.269718	0.000185011	0.730281	0.000185017		8.242	18.8837	27.7954	30.0816	24.4924	43.0899	56.6348										8.242	56.6348	59.336								42.3	0.1
																			8.2525	18.8443	27.774	30.0712	24.4761	43.1141	56.4001										8.2525	56.4001	59.2605								28	0.63
																			8.263	18.8126	27.7662	30.0433	24.4658	42.9664	56.6334										8.263	56.6334	59.6359								28	0.5
																			8.2735	18.7868	27.7702	30.0191	24.4487	42.9623	56.4626										8.2735	56.4626	59.776								61.8	0.04
																			8.284	18.7586	27.7597	30.0142	24.4407	42.934	56.5537										8.284	56.5537	59.7699								70.5	0.02
																			8.2945	18.7445	27.7489	30.0121	24.4347	42.9304	56.5827										8.2945	56.5827	60.0446								54.4	0.16
																			8.305	18.7244	27.7406	30.0103	24.428	42.8906	56.3545										8.305	56.3545	59.89								43.7	0.52
																			8.3155	18.6961	27.7422	29.9914	24.4089	42.8958	56.5576										8.3155	56.5576	60.0156								31.28	0.39
																			8.326	18.6687	27.7207	29.9802	24.392	42.9141	56.2839										8.326	56.2839	60.2948								56.4	0.27
																			8.3365	18.6446	27.6973	29.9631	24.3686	42.921	56.7111										8.3365	56.7111	59.4577								48.2	0.53
																			8.347	18.6295	27.6872	29.967	24.3552	42.8918	56.5037										8.347	56.5037	60.4817								70	0.2
																			8.3575	18.6118	27.6641	29.9427	24.3432	42.8915	56.2374										8.3575	56.2374	59.9975							This Work	25.54	0.68
																			8.368	18.5993	27.6685	29.9388	24.3343	42.8661	56.2545										8.368	56.2545	59.7719								45.62	0.72
																			8.3785	18.5981	27.6792	29.9598	24.3437	42.8631	55.9336										8.3785	55.9336	60.0077								59.32	0.73
																			8.389	18.5986	27.6767	29.9641	24.3488	42.9171	56.471										8.389	56.471	60.1043
																			8.3995	18.5992	27.6903	29.9776	24.3431	42.8515	56.3493										8.3995	56.3493	60.1695
																			8.41	18.601	27.6789	29.9648	24.3527	42.8669	56.6878										8.41	56.6878	59.7221
																			8.4205	18.5986	27.6753	29.9761	24.3433	42.83	56.2693										8.4205	56.2693	59.0323
																			8.431	18.5883	27.6583	29.9928	24.342	42.9418	56.4868										8.431	56.4868	60.4214
																			8.4415	18.5804	27.655	29.9832	24.3303	42.8977	56.0039										8.4415	56.0039	59.5724
																			8.452	18.5798	27.6526	29.9722	24.3371	42.8889	56.3698										8.452	56.3698	59.6946
																			8.4625	18.5871	27.6607	29.9742	24.3355	42.8995	56.286										8.4625	56.286	59.78
																			8.473	18.6012	27.6631	29.9817	24.3417	42.9149	56.7504										8.473	56.7504	59.6722
																			8.4835	18.6149	27.6734	30.0074	24.358	42.9144	56.632										8.4835	56.632	60.2773
																			8.494	18.6303	27.685	30.0271	24.3673	42.998	56.2121										8.494	56.2121	59.8534
																			8.5045	18.6444	27.6963	30.046	24.3815	43.0197	56.6762										8.5045	56.6762	60.2409
																			8.515	18.6585	27.6989	30.0563	24.396	42.9991	56.4322										8.515	56.4322	59.7515
																			8.5255	18.6667	27.7057	30.068	24.4025	42.9523	56.593										8.5255	56.593	60.353
																			8.536	18.6696	27.7069	30.0618	24.405	43.0709	56.6386										8.536	56.6386	59.9476
																			8.5465	18.6743	27.7021	30.0677	24.3954	42.9975	56.7069										8.5465	56.7069	59.5886
																			8.557	18.6893	27.708	30.0776	24.4058	43.0657	56.7196										8.557	56.7196	60.0447
																			8.5675	18.7033	27.71	30.1169	24.4107	43.0194	56.499										8.5675	56.499	60.1667
																			8.578	18.7214	27.7294	30.1363	24.4305	43.1095	56.7524										8.578	56.7524	60.1258
																			8.5885	18.7473	27.7544	30.1488	24.4509	43.1607	56.8961										8.5885	56.8961	60.4171
																			8.599	18.7645	27.7485	30.1667	24.4574	43.1316	56.6751										8.599	56.6751	59.8224
																			8.6095	18.7807	27.7703	30.1808	24.4831	43.2165	56.9226										8.6095	56.9226	60.2095
																			8.62	18.7983	27.7734	30.1975	24.494	43.0553	56.6683										8.62	56.6683	60.5977
																			8.6305	18.8032	27.7804	30.2055	24.4847	43.1988	57.2203										8.6305	57.2203	60.504
																			8.641	18.8031	27.7762	30.216	24.5015	43.2888	57.4172										8.641	57.4172	60.1624
																			8.6515	18.8149	27.7939	30.2362	24.4991	43.2639	56.718										8.6515	56.718	59.7066
																			8.662	18.8174	27.7862	30.2491	24.4973	43.262	56.5431										8.662	56.5431	60.6368
																			8.6725	18.8331	27.8116	30.2643	24.518	43.3479	56.6556										8.6725	56.6556	60.2046
																			8.683	18.8463	27.811	30.28	24.548	43.331	57.0181										8.683	57.0181	60.663
																			8.6935	18.868	27.8257	30.3075	24.5615	43.3481	57.1023										8.6935	57.1023	60.6755
																			8.704	18.8788	27.8601	30.3142	24.5819	43.3827	56.7174										8.704	56.7174	60.147
																			8.7145	18.8935	27.854	30.3604	24.6034	43.3443	57.255										8.7145	57.255	60.3792
																			8.725	18.8949	27.8743	30.35	24.6046	43.4452	57.1271										8.725	57.1271	60.3975
																			8.7355	18.8906	27.8579	30.348	24.6144	43.446	56.7391										8.7355	56.7391	60.9772
																			8.746	18.8825	27.8809	30.3622	24.6038	43.5085	56.7174										8.746	56.7174	60.2577
																			8.7565	18.8865	27.8503	30.3734	24.6101	43.3971	57.0794										8.7565	57.0794	60.6361
																			8.767	18.8838	27.8735	30.3769	24.621	43.412	57.0932										8.767	57.0932	60.9919
																			8.7775	18.8846	27.8748	30.3851	24.6413	43.5617	56.9949										8.7775	56.9949	61.1001
																			8.788	18.894	27.8787	30.3987	24.6634	43.5556	56.9168										8.788	56.9168	60.2741
																			8.7985	18.904	27.8966	30.4132	24.68	43.5676	57.0778										8.7985	57.0778	61.338
																			8.809	18.9062	27.9096	30.4313	24.6912	43.683	57.2572										8.809	57.2572	60.7653
																			8.8195	18.9016	27.9254	30.4497	24.7086	43.6034	57.256										8.8195	57.256	60.1895
																			8.83	18.894	27.9223	30.4673	24.7205	43.6529	57.3088										8.83	57.3088	60.592
																			8.8405	18.8753	27.9035	30.4618	24.7112	43.7316	56.9768										8.8405	56.9768	60.5108
																			8.851	18.8718	27.8991	30.4507	24.7029	43.6729	57.0859										8.851	57.0859	60.9251
																			8.8615	18.8534	27.9047	30.4493	24.7084	43.7039	57.2013										8.8615	57.2013	60.5979
																			8.872	18.8499	27.9091	30.4568	24.7157	43.7812	56.9813										8.872	56.9813	61.2885
																			8.8825	18.8507	27.912	30.4597	24.7291	43.7732	57.1291										8.8825	57.1291	60.9903
																			8.893	18.8487	27.921	30.4708	24.7412	43.8119	57.2845										8.893	57.2845	61.0523
																			8.9035	18.8511	27.94	30.4784	24.7395	43.8529	57.8076										8.9035	57.8076	61.2081
																			8.914	18.8451	27.9369	30.4909	24.7543	43.8612	57.4975										8.914	57.4975	60.8932
																			8.9245	18.8371	27.9503	30.4688	24.7529	43.7556	57.2826										8.9245	57.2826	61.2262
																			8.935	18.8189	27.9409	30.4718	24.7632	43.7838	57.3442										8.935	57.3442	60.634
																			8.9455	18.8085	27.9282	30.4695	24.7342	43.8132	57.5696										8.9455	57.5696	61.2077
																			8.956	18.791	27.9515	30.4698	24.7351	43.8988	57.6418										8.956	57.6418	61.474
																			8.9665	18.7833	27.9415	30.4595	24.7377	43.7438	57.5586										8.9665	57.5586	60.6494
																			8.977	18.784	27.946	30.4685	24.7385	43.7843	57.6629										8.977	57.6629	61.0682
																			8.9875	18.7835	27.9495	30.469	24.7375	43.9454	57.9228										8.9875	57.9228	61.6125
																			8.998	18.7845	27.9644	30.4613	24.7367	43.8169	57.3951										8.998	57.3951	61.3365
																			9.0085	18.7829	27.975	30.4662	24.7508	43.9685	57.4941										9.0085	57.4941	61.0697
																			9.019	18.7941	28.0122	30.4784	24.7502	43.9425	57.8377										9.019	57.8377	60.8619
																			9.0295	18.785	27.9857	30.4447	24.7312	43.8527	57.0218										9.0295	57.0218	61.6897
																			9.04	18.7705	27.9922	30.4561	24.7362	43.92	57.9043										9.04	57.9043	61.1199
																			9.0505	18.7676	27.9769	30.4322	24.7096	43.8526	57.866										9.0505	57.866	61.0165
																			9.061	18.7532	27.9834	30.4254	24.6843	43.8643	57.8351										9.061	57.8351	62.038
																			9.0715	18.7555	27.9937	30.3988	24.6927	43.941	57.9695										9.0715	57.9695	60.9165
																			9.082	18.7529	28.0058	30.4023	24.6723	43.8632	57.5301										9.082	57.5301	61.2379
																			9.0925	18.7635	28.0093	30.3882	24.6783	43.9131	57.4521										9.0925	57.4521	61.6083
																			9.103	18.7676	28.028	30.3784	24.6822	44.0363	57.7246										9.103	57.7246	61.9204
																			9.1135	18.7764	28.025	30.3805	24.6845	44.0139	57.8304										9.1135	57.8304	61.5825
																			9.124	18.7841	28.0593	30.3855	24.6846	43.9305	57.3096										9.124	57.3096	60.7092
																			9.1345	18.769	28.0734	30.3528	24.6674	43.9523	57.7143										9.1345	57.7143	60.8358
																			9.145	18.776	28.04	30.3742	24.6565	43.9009	58.0902										9.145	58.0902	62.1054
																			9.1555	18.7595	28.0224	30.3376	24.6452	43.9438	57.2215										9.1555	57.2215	61.6274
																			9.166	18.7498	28.0473	30.3338	24.6325	43.9387	57.8951										9.166	57.8951	60.9188
																			9.1765	18.7465	28.0462	30.335	24.6265	43.9028	57.5869										9.1765	57.5869	60.2791
																			9.187	18.7465	28.0429	30.3274	24.636	43.8744	57.4575										9.187	57.4575	60.5781
																			9.1975	18.7495	28.0731	30.3242	24.6219	43.8734	57.863										9.1975	57.863	60.7089
																			9.208	18.751	28.071	30.3316	24.6203	44.0341	57.5483										9.208	57.5483	61.4365
																			9.2185	18.7532	28.1003	30.3471	24.6305	43.9757	56.9837										9.2185	56.9837	60.8291
																			9.229	18.7478	28.0905	30.3257	24.6307	43.9022	57.6123										9.229	57.6123	61.3675
																			9.2395	18.7511	28.0959	30.3309	24.6288	43.9092	57.6676										9.2395	57.6676	60.7355
																			9.25	18.7326	28.0861	30.3446	24.6184	43.8994	58.2549										9.25	58.2549	60.29
																			9.2605	18.7219	28.0865	30.3258	24.598	43.9214	58.0023										9.2605	58.0023	61.0408
																			9.271	18.6999	28.0858	30.3389	24.594	43.9956	58.1894										9.271	58.1894	60.9847
																			9.2815	18.694	28.0799	30.3201	24.5993	43.9305	57.4035										9.2815	57.4035	62.123
																			9.292	18.6972	28.0927	30.3254	24.6044	43.9319	57.6048										9.292	57.6048	60.8301
																			9.3025	18.696	28.0946	30.3354	24.6085	43.9585	57.9095										9.3025	57.9095	61.1396
																			9.313	18.6977	28.1152	30.3342	24.6185	43.9485	57.6715										9.313	57.6715	61.3426
																			9.3235	18.6979	28.1034	30.3442	24.6171	43.966	57.6116										9.3235	57.6116	61.3839
																			9.334	18.6908	28.1005	30.3833	24.6296	43.9909	57.4813										9.334	57.4813	61.3184
																			9.3445	18.6847	28.105	30.3581	24.6309	44.0485	58.5774										9.3445	58.5774	60.7583
																			9.355	18.6679	28.1054	30.3746	24.6238	43.8872	57.7765										9.355	57.7765	62.2514
																			9.3655	18.6488	28.11	30.3672	24.5948	43.9136	57.9091										9.3655	57.9091	60.8347
																			9.376	18.6403	28.0774	30.3694	24.6031	43.9301	57.6951										9.376	57.6951	60.908
																			9.3865	18.6447	28.0944	30.3507	24.6164	43.8953	58.134										9.3865	58.134	61.1187
																			9.397	18.6454	28.1019	30.3854	24.6276	43.9973	58.0854										9.397	58.0854	61.6023
																			9.4075	18.6482	28.0976	30.3899	24.6391	43.9516	57.7134										9.4075	57.7134	60.8927
																			9.418	18.644	28.1095	30.4196	24.6455	43.9916	57.9725										9.418	57.9725	61.2249
																			9.4285	18.6553	28.1164	30.446	24.6476	44.1199	57.4548										9.4285	57.4548	61.4337
																			9.439	18.6595	28.1327	30.4285	24.6741	44.0194	57.2066										9.439	57.2066	61.5623
																			9.4495	18.6549	28.1104	30.4366	24.6627	44.0944	57.6748										9.4495	57.6748	61.4726
																			9.46	18.6329	28.1081	30.4568	24.6654	43.9237	57.7871										9.46	57.7871	61.6594
																			9.4705	18.6399	28.1204	30.4595	24.6555	44.165	58.0872										9.4705	58.0872	61.2189
																			9.481	18.6396	28.0823	30.4502	24.6576	44.0693	58.1959										9.481	58.1959	62.0586
																			9.4915	18.6473	28.1153	30.4698	24.6745	44.0483	58.4661										9.4915	58.4661	61.7206
																			9.502	18.6571	28.1121	30.4844	24.685	44.1884	58.1396										9.502	58.1396	61.5834
																			9.5125	18.6681	28.1278	30.5222	24.7054	44.1643	57.7121										9.5125	57.7121	61.9028
																			9.523	18.6813	28.149	30.5245	24.7191	44.2063	58.1204										9.523	58.1204	61.4585
																			9.5335	18.6942	28.1635	30.5394	24.7315	44.2156	58.0659										9.5335	58.0659	61.6572
																			9.544	18.6975	28.1468	30.5522	24.7439	44.2029	57.5267										9.544	57.5267	62.5753
																			9.5545	18.7012	28.1479	30.5483	24.7304	44.2303	58.2223										9.5545	58.2223	62.0158
																			9.565	18.6956	28.1688	30.5697	24.7322	44.295	57.5342										9.565	57.5342	61.4189
																			9.5755	18.6984	28.1612	30.5797	24.7406	44.16	58.2866										9.5755	58.2866	62.0209
																			9.586	18.7093	28.1507	30.566	24.7407	44.3605	58.2363										9.586	58.2363	61.4506
																			9.5965	18.7274	28.1722	30.6013	24.7679	44.37	58.3433										9.5965	58.3433	61.8415
																			9.607	18.745	28.19	30.6223	24.7925	44.3581	57.9862										9.607	57.9862	61.844
																			9.6175	18.7621	28.2106	30.6454	24.8048	44.3805	58.2017										9.6175	58.2017	61.7312
																			9.628	18.7797	28.2302	30.6792	24.8274	44.4059	58.4219										9.628	58.4219	61.7454
																			9.6385	18.8025	28.238	30.709	24.8427	44.4317	58.7501										9.6385	58.7501	61.3462
																			9.649	18.8145	28.235	30.6874	24.8443	44.4654	57.7097										9.649	57.7097	61.5101
																			9.6595	18.816	28.244	30.7068	24.8603	44.4234	58.2413										9.6595	58.2413	62.473
																			9.67	18.8129	28.2481	30.7056	24.8591	44.4439	58.4594										9.67	58.4594	62.2077
																			9.6805	18.8261	28.2632	30.724	24.8734	44.472	58.0981										9.6805	58.0981	61.9188
																			9.691	18.8394	28.2739	30.7272	24.8811	44.5874	58.5233										9.691	58.5233	62.3829
																			9.7015	18.8576	28.2803	30.7694	24.8994	44.5411	58.2045										9.7015	58.2045	62.3939
																			9.712	18.874	28.3053	30.7739	24.9245	44.5892	58.4921										9.712	58.4921	62.0513
																			9.7225	18.891	28.3196	30.8034	24.9441	44.5795	58.3644										9.7225	58.3644	62.6038
																			9.733	18.9038	28.3419	30.8045	24.9577	44.5693	58.3862										9.733	58.3862	62.4787
																			9.7435	18.9248	28.3599	30.825	24.9716	44.6689	58.1848										9.7435	58.1848	62.3726
																			9.754	18.9341	28.3752	30.829	24.9854	44.6762	58.4563										9.754	58.4563	62.9467
																			9.7645	18.9345	28.3705	30.8103	24.9889	44.6878	58.4163										9.7645	58.4163	62.5784
																			9.775	18.9405	28.3649	30.8508	24.9876	44.8723	58.4735										9.775	58.4735	62.6635
																			9.7855	18.944	28.4029	30.8557	25.0111	44.7404	58.9919										9.7855	58.9919	61.8852
																			9.796	18.9615	28.4026	30.8814	25.0239	44.8059	58.5625										9.796	58.5625	62.623
																			9.8065	18.9753	28.4208	30.8963	25.0392	44.7892	58.5331										9.8065	58.5331	62.6207
																			9.817	18.9929	28.439	30.9022	25.0559	44.8258	58.3965										9.817	58.3965	62.4366
																			9.8275	19.0033	28.4376	30.918	25.0585	44.8864	58.6897										9.8275	58.6897	62.3733
																			9.838	19.0195	28.4669	30.9486	25.0798	44.8845	58.5357										9.838	58.5357	62.3692
																			9.8485	19.0307	28.4848	30.9668	25.0951	44.8838	58.4873										9.8485	58.4873	62.2876
																			9.859	19.0259	28.4892	30.9663	25.1139	44.9298	58.4259										9.859	58.4259	61.9879
																			9.8695	19.0323	28.4771	30.9544	25.1138	45.002	58.6115										9.8695	58.6115	61.758
																			9.88	19.0374	28.4929	30.9642	25.1065	44.9205	58.2051										9.88	58.2051	62.7533
																			9.8905	19.0387	28.5152	30.9845	25.1136	44.8447	58.7872										9.8905	58.7872	62.5559
																			9.901	19.0411	28.5329	31.0014	25.1297	45.059	59.0525										9.901	59.0525	62.3999
																			9.9115	19.0558	28.5298	31.0066	25.1441	45.0352	58.4845										9.9115	58.4845	62.6683
																			9.922	19.0641	28.5535	31.0098	25.1546	44.9853	59.3295										9.922	59.3295	63.0398
																			9.9325	19.0728	28.5685	31.0421	25.1656	45.1645	58.818										9.9325	58.818	63.0382
																			9.943	19.0827	28.5927	31.0405	25.1678	45.0898	58.7987										9.943	58.7987	62.9076
																			9.9535	19.0954	28.599	31.0456	25.1904	45.1481	58.4988										9.9535	58.4988	62.6844
																			9.964	19.0845	28.6006	31.0534	25.1794	45.0761	58.6323										9.964	58.6323	63.4261
																			9.9745	19.0773	28.5935	31.0454	25.1987	45.1908	58.838										9.9745	58.838	62.8991
																			9.985	19.08	28.5962	31.0456	25.1943	45.2731	58.9167										9.985	58.9167	62.7278
																			9.9955	19.0749	28.6121	31.0761	25.1945	45.2052	58.9564										9.9955	58.9564	63.1996
																			10.006	19.0836	28.6282	31.0691	25.1995	45.148	59.0971										10.006	59.0971	63.1545
																			10.0165	19.0889	28.6362	31.0901	25.2147	45.1539	58.706										10.0165	58.706	63.0123
																			10.027	19.0936	28.6448	31.0935	25.221	45.2488	58.79										10.027	58.79	62.6176
																			10.0375	19.0942	28.6578	31.0908	25.2265	45.2741	59.2917										10.0375	59.2917	62.4893
																			10.048	19.1007	28.6816	31.1135	25.2326	45.2227	59.0579										10.048	59.0579	62.7615
																			10.0585	19.1042	28.6809	31.1213	25.2467	45.3232	58.6188										10.0585	58.6188	62.4913
																			10.069	19.0985	28.7008	31.1074	25.2388	45.1601	58.3479										10.069	58.3479	62.5373
																			10.0795	19.0927	28.6886	31.1239	25.2379	45.3547	59.3297										10.0795	59.3297	63.1745
																			10.09	19.0904	28.6862	31.0914	25.2484	45.319	58.8488										10.09	58.8488	61.8738
																			10.1005	19.0858	28.7008	31.115	25.2496	45.2712	58.934										10.1005	58.934	62.3346
																			10.111	19.0901	28.7157	31.1245	25.265	45.3993	58.7248										10.111	58.7248	62.55
																			10.1215	19.0983	28.7327	31.1439	25.2631	45.3076	58.8394										10.1215	58.8394	63.2177
																			10.132	19.0989	28.7366	31.1351	25.2758	45.2919	59.2858										10.132	59.2858	63.1147
																			10.1425	19.1007	28.7448	31.1435	25.2767	45.3977	59.0387										10.1425	59.0387	62.1276
																			10.153	19.1036	28.7491	31.1678	25.2869	45.3877	58.9459										10.153	58.9459	63.2016
																			10.1635	19.1028	28.7759	31.1602	25.2925	45.331	59.178										10.1635	59.178	63.0753
																			10.174	19.091	28.7694	31.1353	25.2905	45.3641	59.4263										10.174	59.4263	63.5801
																			10.1845	19.086	28.7835	31.1348	25.2835	45.379	59.2661										10.1845	59.2661	63.1266
																			10.195	19.0797	28.7829	31.1464	25.288	45.4181	58.9726										10.195	58.9726	64.3196
																			10.2055	19.0853	28.8086	31.1475	25.2864	45.452	59.1318										10.2055	59.1318	62.8274
																			10.216	19.0855	28.7847	31.1589	25.2941	45.426	59.2725										10.216	59.2725	63.6465
																			10.2265	19.0884	28.803	31.1699	25.304	45.4831	59.0848										10.2265	59.0848	62.878
																			10.237	19.0906	28.8079	31.1619	25.3066	45.5164	59.0812										10.237	59.0812	63.161
																			10.2475	19.0885	28.8209	31.1668	25.3118	45.504	59.4964										10.2475	59.4964	63.0268
																			10.258	19.0978	28.8364	31.1794	25.3214	45.5926	59.2999										10.258	59.2999	62.6372
																			10.2685	19.0844	28.8297	31.1621	25.3196	45.555	59.5195										10.2685	59.5195	62.9958
																			10.279	19.0773	28.8236	31.1754	25.3212	45.6086	59.0134										10.279	59.0134	64.1968
																			10.2895	19.0678	28.8352	31.1686	25.3095	45.4027	59.3566										10.2895	59.3566	63.4146
																			10.3	19.07	28.8672	31.1818	25.3153	45.5208	59.0803										10.3	59.0803	63.5094
																			10.3105	19.0634	28.8668	31.141	25.3168	45.4921	59.197										10.3105	59.197	64.3344
																			10.321	19.0695	28.8662	31.1546	25.3166	45.5114	59.7144										10.321	59.7144	63.4922
																			10.3315	19.0676	28.8925	31.1671	25.3263	45.5583	59.4266										10.3315	59.4266	63.1181
																			10.342	19.0755	28.8902	31.1776	25.3322	45.5819	59.4021										10.342	59.4021	63.2352
																			10.3525	19.0741	28.8981	31.1796	25.3388	45.6298	59.3883										10.3525	59.3883	63.173
																			10.363	19.0736	28.9056	31.2049	25.3443	45.5641	59.3217										10.363	59.3217	62.465
																			10.3735	19.0741	28.8939	31.1938	25.3433	45.6857	59.434										10.3735	59.434	63.9977
																			10.384	19.0688	28.9187	31.2083	25.3526	45.7527	59.8103										10.384	59.8103	63.2004
																			10.3945	19.0636	28.9258	31.1732	25.3366	45.6239	59.0115										10.3945	59.0115	63.2227
																			10.405	19.0521	28.9038	31.2034	25.3555	45.4738	59.5534										10.405	59.5534	63.3941
																			10.4155	19.0605	28.9362	31.2008	25.3582	45.5316	59.2138										10.4155	59.2138	63.2321
																			10.426	19.0736	28.9429	31.2297	25.3644	45.4747	60.6498										10.426	60.6498	63.62
																			10.4365	19.0686	28.9668	31.2263	25.3884	45.5574	58.7755										10.4365	58.7755	62.9233
																			10.447	19.0866	28.9738	31.2647	25.4099	45.6585	60.0074										10.447	60.0074	62.8578
																			10.4575	19.0954	29.0048	31.2759	25.4054	45.743	59.7328										10.4575	59.7328	63.4556
																			10.468	19.1033	29.0055	31.2829	25.4265	45.8269	59.8476										10.468	59.8476	63.4933
																			10.4785	19.1009	29.0144	31.3124	25.4277	45.6153	60.0044										10.4785	60.0044	64.3013
																			10.489	19.0916	29.0205	31.2871	25.4361	45.7579	59.4248										10.489	59.4248	62.6397
																			10.4995	19.095	29.0233	31.2923	25.4309	45.7705	59.1704										10.4995	59.1704	62.9194
																			10.51	19.0933	29.0325	31.3194	25.4413	45.652	59.7188										10.51	59.7188	64.3408
																			10.5205	19.1088	29.0602	31.341	25.4591	45.7302	59.7474										10.5205	59.7474	63.4992
																			10.531	19.119	29.064	31.351	25.4852	45.6679	60.6304										10.531	60.6304	63.4307
																			10.5415	19.1334	29.085	31.3735	25.4984	45.7686	59.9653										10.5415	59.9653	63.1508
																			10.552	19.1443	29.1056	31.4028	25.5179	45.8116	60.3756										10.552	60.3756	64.4374
																			10.5625	19.1582	29.108	31.4178	25.532	45.8553	59.7843										10.5625	59.7843	63.8401
																			10.573	19.1614	29.1306	31.4315	25.555	45.8377	60.2407										10.573	60.2407	63.0028
																			10.5835	19.1634	29.149	31.4408	25.5662	45.8625	59.9044										10.5835	59.9044	63.5553
																			10.594	19.1671	29.1468	31.4599	25.576	45.931	59.6899										10.594	59.6899	64.8324
																			10.6045	19.1692	29.1652	31.4877	25.5866	45.8409	59.8099										10.6045	59.8099	63.9632
																			10.615	19.1753	29.1836	31.475	25.5932	45.9038	59.3434										10.615	59.3434	63.6287
																			10.6255	19.1856	29.17	31.5005	25.6189	45.9444	59.0523										10.6255	59.0523	63.8714
																			10.636	19.1929	29.1859	31.5147	25.637	45.9717	59.6332										10.636	59.6332	63.5918
																			10.6465	19.2081	29.2098	31.5237	25.6542	45.9588	59.9949										10.6465	59.9949	63.986
																			10.657	19.2248	29.2064	31.5463	25.6805	45.8918	60.1028										10.657	60.1028	63.8576
																			10.6675	19.2356	29.2342	31.598	25.7006	46.1803	59.9761										10.6675	59.9761	63.3698
																			10.678	19.246	29.2671	31.6134	25.7016	46.074	60.0607										10.678	60.0607	64.3998
																			10.6885	19.2499	29.2569	31.6079	25.7185	46.1704	59.8786										10.6885	59.8786	63.5843
																			10.699	19.2468	29.263	31.6323	25.7211	46.0447	59.0902										10.699	59.0902	64.0815
																			10.7095	19.2544	29.2606	31.6753	25.7534	46.0574	59.8052										10.7095	59.8052	63.7606
																			10.72	19.2639	29.2599	31.6537	25.7378	46.0755	59.8314										10.72	59.8314	64.2761
																			10.7305	19.2739	29.282	31.6711	25.7503	46.1664	59.8493										10.7305	59.8493	64.114
																			10.741	19.2885	29.3188	31.6801	25.7643	46.1789	60.088										10.741	60.088	64.4551
																			10.7515	19.3033	29.3141	31.6835	25.7932	46.2278	60.2003										10.7515	60.2003	64.436
																			10.762	19.3077	29.3284	31.7304	25.7979	46.2216	60.2043										10.762	60.2043	63.8321
																			10.7725	19.3176	29.3348	31.7292	25.817	46.1794	60.4986										10.7725	60.4986	63.8668
																			10.783	19.323	29.335	31.7474	25.8329	46.2046	60.1948										10.783	60.1948	64.5115
																			10.7935	19.3284	29.3632	31.7614	25.8305	46.2597	59.8531										10.7935	59.8531	63.1441
																			10.804	19.3326	29.3303	31.7789	25.8435	46.3885	60.0704										10.804	60.0704	64.083
																			10.8145	19.3358	29.3586	31.7792	25.8491	46.2982	60.1107										10.8145	60.1107	64.2804
																			10.825	19.3407	29.3729	31.7507	25.8407	46.43	60.2359										10.825	60.2359	64.231
																			10.8355	19.3509	29.3824	31.7829	25.8698	46.2951	59.7246										10.8355	59.7246	63.9703
																			10.846	19.3641	29.3946	31.8008	25.8684	46.349	60.3147										10.846	60.3147	63.7363
																			10.8565	19.3788	29.4199	31.8237	25.892	46.3558	60.2616										10.8565	60.2616	64.6009
																			10.867	19.3845	29.4275	31.8285	25.8983	46.3406	60.5856										10.867	60.5856	64.1159
																			10.8775	19.3939	29.4467	31.8428	25.9101	46.3959	60.6499										10.8775	60.6499	63.745
																			10.888	19.4012	29.4395	31.856	25.9226	46.4052	60.6269										10.888	60.6269	64.0919
																			10.8985	19.4029	29.4401	31.8396	25.916	46.3983	60.1851										10.8985	60.1851	64.9836
																			10.909	19.407	29.4518	31.8655	25.9366	46.4326	60.3956										10.909	60.3956	64.3983
																			10.9195	19.4103	29.4485	31.8527	25.9345	46.5455	60.247										10.9195	60.247	64.7415
																			10.93	19.4131	29.484	31.8758	25.9388	46.6267	59.9565										10.93	59.9565	65.3069
																			10.9405	19.422	29.5018	31.8964	25.9561	46.5497	60.5009										10.9405	60.5009	65.0324
																			10.951	19.433	29.5042	31.8984	25.9582	46.5548	60.0314										10.951	60.0314	64.6831
																			10.9615	19.4404	29.5135	31.9001	25.9772	46.5856	60.2838										10.9615	60.2838	64.3687
																			10.972	19.4524	29.5154	31.9047	25.9956	46.7032	60.7063										10.972	60.7063	63.9555
																			10.9825	19.4539	29.5424	31.9105	25.9819	46.6589	60.7943										10.9825	60.7943	64.5791
																			10.993	19.4563	29.5609	31.9231	25.9779	46.591	59.9435										10.993	59.9435	64.8689
																			11.0035	19.4622	29.5604	31.9432	25.9966	46.7124	60.5201										11.0035	60.5201	65.3984
																			11.014	19.4624	29.5727	31.9457	26.002	46.7385	60.3944										11.014	60.3944	65.1845
																			11.0245	19.4606	29.5736	31.9443	25.9921	46.6752	60.0532										11.0245	60.0532	65.2573
																			11.035	19.4654	29.5789	31.926	26.0083	46.6687	60.6808										11.035	60.6808	64.7825
																			11.0455	19.4676	29.599	31.944	26.0207	46.7046	60.1893										11.0455	60.1893	64.757
																			11.056	19.4792	29.6205	31.959	26.0229	46.7563	60.3809										11.056	60.3809	64.5576
																			11.0665	19.4851	29.6474	31.9518	26.0449	46.7361	60.2922										11.0665	60.2922	64.7454
																			11.077	19.4924	29.6437	31.9942	26.0504	46.7685	60.6774										11.077	60.6774	64.0834
																			11.0875	19.4922	29.6565	31.9741	26.0573	46.7031	60.7676										11.0875	60.7676	64.9729
																			11.098	19.4877	29.6787	31.9912	26.0618	46.9189	61.2202										11.098	61.2202	64.3534
																			11.1085	19.483	29.6767	31.9516	26.0557	46.7484	61.1974										11.1085	61.1974	65.3018
																			11.119	19.4891	29.6944	32.0059	26.0618	46.8376	60.8819										11.119	60.8819	65.812
																			11.1295	19.4856	29.6938	31.9959	26.0561	46.7644	60.7547										11.1295	60.7547	65.5115
																			11.14	19.4879	29.722	32.0022	26.0704	46.8411	60.6602										11.14	60.6602	64.6828
																			11.1505	19.4917	29.7287	31.9961	26.0898	46.8855	60.3256										11.1505	60.3256	64.6923
																			11.161	19.4938	29.7434	32.0206	26.0883	46.9303	60.2203										11.161	60.2203	64.9315
																			11.1715	19.4952	29.7658	32.0152	26.1072	46.9104	60.4862										11.1715	60.4862	64.4271
																			11.182	19.4976	29.7883	32.0205	26.1048	46.8801	60.8266										11.182	60.8266	65.0079
																			11.1925	19.5016	29.7805	32.0128	26.1043	46.9411	60.921										11.1925	60.921	64.9381
																			11.203	19.4979	29.8072	32.0468	26.1152	46.9356	60.3639										11.203	60.3639	65.3696
																			11.2135	19.4803	29.8114	32.0229	26.1078	46.9968	60.7617										11.2135	60.7617	64.6338
																			11.224	19.4776	29.8225	32.0513	26.1017	46.9455	60.8119										11.224	60.8119	65.0509
																			11.2345	19.4849	29.8276	32.041	26.1232	46.8714	60.4607										11.2345	60.4607	64.9668
																			11.245	19.4798	29.8543	32.0365	26.1292	47.0697	60.3957										11.245	60.3957	65.4203
																			11.2555	19.4828	29.8769	32.0414	26.1429	46.9224	60.4964										11.2555	60.4964	65.4949
																			11.266	19.4848	29.8728	32.049	26.147	47.0289	60.3525										11.266	60.3525	64.3289
																			11.2765	19.4914	29.8931	32.0681	26.1597	47.0439	60.4131										11.2765	60.4131	65.9491
																			11.287	19.4917	29.9394	32.0672	26.1788	47.022	60.3637										11.287	60.3637	65.2236
																			11.2975	19.4904	29.9252	32.1023	26.1729	46.9391	60.2818										11.2975	60.2818	65.3095
																			11.308	19.4821	29.9473	32.0818	26.1745	47.1523	60.8448										11.308	60.8448	65.8183
																			11.3185	19.4833	29.9287	32.0739	26.1907	47.0885	60.5925										11.3185	60.5925	65.0203
																			11.329	19.4801	29.9693	32.0961	26.1889	47.124	60.2025										11.329	60.2025	64.8957
																			11.3395	19.4732	29.9621	32.1064	26.1932	47.1944	61.4524										11.3395	61.4524	65.1076
																			11.35	19.4779	29.968	32.097	26.1916	47.133	60.111										11.35	60.111	65.5835
																			11.3605	19.4751	29.9981	32.099	26.2133	47.1386	60.8446										11.3605	60.8446	66.0878
																			11.371	19.4833	30.0177	32.1031	26.2126	47.1821	60.7279										11.371	60.7279	65.4796
																			11.3815	19.4843	30.0402	32.1126	26.2338	47.2254	60.7656										11.3815	60.7656	65.4912
																			11.392	19.49	30.0374	32.1414	26.2436	47.1582	60.3457										11.392	60.3457	66.0393
																			11.4025	19.4902	30.0556	32.1422	26.2501	47.1939	60.6699										11.4025	60.6699	65.6057
																			11.413	19.4929	30.0678	32.1642	26.2615	47.2872	61.6102										11.413	61.6102	64.8132
																			11.4235	19.4871	30.0658	32.1584	26.2673	47.1731	60.9784										11.4235	60.9784	65.2241
																			11.434	19.4843	30.0822	32.1919	26.2651	47.2357	61.3491										11.434	61.3491	66.406
																			11.4445	19.4889	30.073	32.1901	26.2703	47.2399	60.4598										11.4445	60.4598	65.5004
																			11.455	19.4919	30.0919	32.208	26.2931	47.2912	60.4867										11.455	60.4867	65.6549
																			11.4655	19.4964	30.091	32.2029	26.303	47.2439	61.0584										11.4655	61.0584	65.4487
																			11.476	19.5025	30.1175	32.2287	26.3088	47.2968	61.0272										11.476	61.0272	65.778
																			11.4865	19.5148	30.1337	32.2405	26.3267	47.2991	60.8718										11.4865	60.8718	65.4911
																			11.497	19.5145	30.1288	32.2408	26.3438	47.329	61.3773										11.497	61.3773	64.8652
																			11.5075	19.5264	30.137	32.2526	26.3552	47.26	60.9071										11.5075	60.9071	65.608
																			11.518	19.5285	30.1524	32.2574	26.3614	47.4449	61.2655										11.518	61.2655	65.9593
																			11.5285	19.537	30.1563	32.2706	26.3732	47.4569	60.7267										11.5285	60.7267	64.884
																			11.539	19.5336	30.184	32.2735	26.3842	47.3405	61.4463										11.539	61.4463	65.3998
																			11.5495	19.5399	30.1694	32.2914	26.3861	47.4468	61.598										11.5495	61.598	65.4542
																			11.56	19.5423	30.1843	32.2885	26.397	47.4223	61.2611										11.56	61.2611	64.9811
																			11.5705	19.5494	30.1892	32.307	26.4122	47.3788	60.6287										11.5705	60.6287	65.138
																			11.581	19.5604	30.1956	32.3253	26.4412	47.5359	61.5279										11.581	61.5279	65.5151
																			11.5915	19.5741	30.2041	32.3462	26.4547	47.5521	61.2256										11.5915	61.2256	65.6796
																			11.602	19.5862	30.2139	32.377	26.4709	47.5229	61.9357										11.602	61.9357	65.3862
																			11.6125	19.5956	30.2441	32.3481	26.4755	47.4437	61.5602										11.6125	61.5602	66.4216
																			11.623	19.604	30.263	32.3774	26.4989	47.4984	61.3395										11.623	61.3395	66.885
																			11.6335	19.603	30.2377	32.382	26.5049	47.6983	61.1564										11.6335	61.1564	65.5844
																			11.644	19.6122	30.2422	32.4155	26.5172	47.6547	61.3775										11.644	61.3775	65.9538
																			11.6545	19.6158	30.2447	32.4246	26.5194	47.4401	61.1264										11.6545	61.1264	65.6311
																			11.665	19.6265	30.2697	32.4496	26.5344	47.5163	61.0646										11.665	61.0646	65.0163
																			11.6755	19.6383	30.2569	32.4339	26.5398	47.6467	61.4991										11.6755	61.4991	66.5054
																			11.686	19.6527	30.2707	32.4576	26.5656	47.6164	61.674										11.686	61.674	66.2831
																			11.6965	19.6601	30.2888	32.4742	26.5812	47.6597	61.3005										11.6965	61.3005	66.1508
																			11.707	19.6784	30.2873	32.4912	26.5881	47.6802	60.7602										11.707	60.7602	66.394
																			11.7175	19.6819	30.3139	32.4772	26.6091	47.6788	61.2716										11.7175	61.2716	66.1165
																			11.728	19.6959	30.2901	32.504	26.619	47.737	61.353										11.728	61.353	67.0315
																			11.7385	19.7033	30.3019	32.5088	26.6305	47.5756	62.0149										11.7385	62.0149	65.9254
																			11.749	19.7036	30.3182	32.5319	26.6356	47.7023	61.4944										11.749	61.4944	65.606
																			11.7595	19.7074	30.3175	32.5566	26.6464	47.587	61.9418										11.7595	61.9418	66.0553
																			11.77	19.7279	30.326	32.5552	26.6456	47.6995	61.8437										11.77	61.8437	66.1643
																			11.7805	19.734	30.328	32.5686	26.663	47.776	61.5208										11.7805	61.5208	66.4052
																			11.791	19.7472	30.3449	32.5771	26.6885	47.8151	62.0662										11.791	62.0662	65.8171
																			11.8015	19.7623	30.3556	32.5945	26.6956	47.8123	60.9953										11.8015	60.9953	65.7041
																			11.812	19.7757	30.3861	32.6388	26.7122	47.9129	61.7962										11.812	61.7962	66.471
																			11.8225	19.7823	30.3657	32.6148	26.7224	47.7799	61.5811										11.8225	61.5811	66.1318
																			11.833	19.7917	30.3883	32.6267	26.7491	47.9361	61.4179										11.833	61.4179	66.4647
																			11.8435	19.7977	30.3924	32.649	26.7449	47.8661	60.9986										11.8435	60.9986	67.863
																			11.854	19.8076	30.3988	32.6563	26.7568	47.9473	61.5744										11.854	61.5744	67.536
																			11.8645	19.8095	30.4195	32.6932	26.7667	47.9639	61.6721										11.8645	61.6721	66.2948
																			11.875	19.8229	30.403	32.6954	26.7788	47.8907	62.3651										11.875	62.3651	65.406
																			11.8855	19.8363	30.4377	32.6908	26.7935	47.8928	61.8769										11.8855	61.8769	67.776
																			11.896	19.8466	30.4426	32.6956	26.8101	47.9299	62.0819										11.896	62.0819	65.6583
																			11.9065	19.8608	30.4554	32.7307	26.8144	47.9067	61.2587										11.9065	61.2587	66.5468
																			11.917	19.8714	30.4885	32.7297	26.8369	48.0606	61.1056										11.917	61.1056	66.9268
																			11.9275	19.8826	30.4903	32.7218	26.864	48.197	61.2184										11.9275	61.2184	66.9061
																			11.938	19.8848	30.5081	32.7619	26.8606	48.1333	62.2118										11.938	62.2118	66.7694
																			11.9485	19.8956	30.522	32.7851	26.8609	48.2048	61.5756										11.9485	61.5756	65.6835
																			11.959	19.9052	30.5446	32.8028	26.8689	48.154	62.1853										11.959	62.1853	66.1659
																			11.9695	19.9092	30.5582	32.7743	26.8963	47.9446	61.4245										11.9695	61.4245	67.926
																			11.98	19.9245	30.5663	32.8196	26.9003	48.1818	62.1427										11.98	62.1427	67.0144
																			11.9905	19.9401	30.6017	32.8251	26.9164	48.1162	61.3371										11.9905	61.3371	67.0772
																			12.001	19.9471	30.6072	32.8332	26.9303	48.1828	61.8905										12.001	61.8905	67.1483
																			12.0115	19.9588	30.6382	32.864	26.9481	48.3116	61.7274										12.0115	61.7274	66.9873
																			12.022	19.9667	30.6501	32.8941	26.9648	48.2655	62.2335										12.022	62.2335	66.0733
																			12.0325	19.9751	30.6406	32.8526	26.9784	48.3244	62.1408										12.0325	62.1408	66.8946
																			12.043	19.978	30.6652	32.885	27.0053	48.3363	62.1167										12.043	62.1167	66.2328
																			12.0535	19.9904	30.6856	32.8941	26.9996	48.2511	61.7563										12.0535	61.7563	66.7293
																			12.064	19.989	30.7221	32.9042	27.0334	48.4724	62.7312										12.064	62.7312	67.5871
																			12.0745	20.0097	30.7098	32.9135	27.0466	48.3435	61.0271										12.0745	61.0271	66.6946
																			12.085	20.0177	30.7524	32.9327	27.0521	48.4878	62.1064										12.085	62.1064	67.1031
																			12.0955	20.0252	30.7651	32.9622	27.0762	48.4533	61.699										12.0955	61.699	67.2663
																			12.106	20.0365	30.784	32.9639	27.0898	48.4081	61.8295										12.106	61.8295	66.9575
																			12.1165	20.0492	30.8214	33.019	27.1216	48.617	61.9215										12.1165	61.9215	67.4465
																			12.127	20.0578	30.8369	32.9999	27.1261	48.4204	62.1852										12.127	62.1852	65.9888
																			12.1375	20.0638	30.8577	33.0448	27.1339	48.5897	62.022										12.1375	62.022	67.0225
																			12.148	20.0712	30.8795	33.0507	27.1544	48.4266	62.3178										12.148	62.3178	66.314
																			12.1585	20.0796	30.8919	33.0256	27.1906	48.5342	62.4123										12.1585	62.4123	67.0946
																			12.169	20.0776	30.8877	33.0565	27.1963	48.5647	62.0644										12.169	62.0644	67.1282
																			12.1795	20.0885	30.9156	33.0765	27.2082	48.6006	62.2617										12.1795	62.2617	67.7109
																			12.19	20.1009	30.9281	33.0792	27.2184	48.6803	62.0078										12.19	62.0078	66.5677
																			12.2005	20.1083	30.9305	33.1058	27.2537	48.6398	62.7496										12.2005	62.7496	66.9364
																			12.211	20.1211	30.9593	33.1352	27.2517	48.6364	62.0306										12.211	62.0306	67.09
																			12.2215	20.1303	31.0108	33.1631	27.2847	48.7835	62.7636										12.2215	62.7636	67.9103
																			12.232	20.1405	31.0065	33.1525	27.3024	48.7513	62.4531										12.232	62.4531	68.2897
																			12.2425	20.1434	31.0072	33.1632	27.3166	48.6754	62.1684										12.2425	62.1684	67.0136
																			12.253	20.1507	31.034	33.2217	27.3259	48.5381	62.5016										12.253	62.5016	67.9286
																			12.2635	20.1565	31.0422	33.198	27.3411	48.751	61.6116										12.2635	61.6116	68.3216
																			12.274	20.155	31.0154	33.24	27.3677	48.7167	61.9428										12.274	61.9428	66.4449
																			12.2845	20.1588	31.065	33.2365	27.3702	48.8552	62.6603										12.2845	62.6603	67.2409
																			12.295	20.1705	31.0413	33.2463	27.3814	48.8426	62.4091										12.295	62.4091	66.7258
																			12.3055	20.1774	31.0761	33.2537	27.4173	48.8939	62.1891										12.3055	62.1891	67.1972
																			12.316	20.1941	31.0662	33.2659	27.422	48.8398	62.7										12.316	62.7	66.9514
																			12.3265	20.2092	31.0875	33.315	27.4621	48.8758	62.8147										12.3265	62.8147	67.8357
																			12.337	20.2117	31.0853	33.3472	27.4704	48.8969	62.5445										12.337	62.5445	68.5459
																			12.3475	20.2141	31.1009	33.3345	27.4512	48.9736	62.3983										12.3475	62.3983	67.5799
																			12.358	20.2119	31.1071	33.3316	27.4763	48.8422	62.2689										12.358	62.2689	66.9501
																			12.3685	20.2176	31.0919	33.3329	27.4796	48.9269	62.2504										12.3685	62.2504	68.1517
																			12.379	20.2158	31.0822	33.3421	27.4924	48.9183	62.7833										12.379	62.7833	68.4639
																			12.3895	20.2283	31.0927	33.3787	27.4818	48.9082	62.5398										12.3895	62.5398	66.4196
																			12.4	20.2392	31.1061	33.4058	27.5166	49.115	62.2992										12.4	62.2992	67.6079

## Sheet: Figure 3
Part (b)	Sample	SER	SEA	SET	Error	Error	Error	Part (c)	Sample	R	A	Error	Error	Part (d)	Frequency (GHz)	s22	s12	Reflectance	Transmittance	Absorbance	SER	SEA	SET						Part (e)	(I)	Frequency (GHz)	s22	s12	Reflectance	Transmittance	Absorbance	SER	SEA	SET	(II)	Frequency (GHz)	s22	s12	Reflectance	Transmittance	Absorbance	SER	SEA	SET
	rGO-CNF	1.46803	51.6113	53.0794	0.00039927	0.00976508	0.00962749		rGO-CNF	0.284091	0.715904	5.86077e-05	5.86196e-05		8.2	0.644528	0.00326651	0.415416	1.06701e-05	0.584573	2.33153	47.3868	49.7183								8.2	0.616731	1.76485e-05	0.380357	3.1147e-10	0.619643	2.07859	92.9873	95.0658		8.2	0.573852	3.77706e-05	0.329306	1.42661e-09	0.670694	1.73476	86.7222	88.4569
	rGO-CNF+Al Foil	1.20736	88.1148	89.3221	0.000766958	0.419165	0.419913		rGO-CNF+Al Foil	0.24002	0.75998	0.000132402	0.000132402		8.221	0.642748	0.00334404	0.413125	1.11826e-05	0.586864	2.31454	47.2	49.5146								8.221	0.615241	4.16877e-05	0.378522	1.73786e-09	0.621478	2.06574	85.5341	87.5998		8.221	0.572635	9.36934e-05	0.327911	8.77845e-09	0.672089	1.72573	78.8401	80.5658
	rGO-CNF+Carbon Coated Al Foil	0.992186	84.5362	85.5284	0.000614408	0.335295	0.335535		rGO-CNF+Carbon Coated Al Foil	0.201998	0.798002	0.00010555	0.00010555		8.242	0.640414	0.00326223	0.41013	1.06422e-05	0.589859	2.29244	47.4373	49.7297								8.242	0.612758	6.69289e-05	0.375473	4.47948e-09	0.624527	2.04449	81.4432	83.4877		8.242	0.570149	5.86751e-05	0.32507	3.44277e-09	0.67493	1.70741	82.9235	84.6309
	rGO-CNF+Cu Foil	1.46586	85.4664	86.9322	0.0018909	0.29054	0.290614		rGO-CNF+Cu Foil	0.284039	0.715961	0.000296366	0.000296366		8.263	0.637146	0.0032209	0.405955	1.03742e-05	0.594035	2.26181	47.5786	49.8405								8.263	0.609227	4.45674e-05	0.371157	1.98625e-09	0.628843	2.01458	85.0051	87.0197		8.263	0.566745	2.60416e-05	0.3212	6.78165e-10	0.6788	1.68258	90.0041	91.6866
	rGO-CNF+Cu Tape	1.36757	83.3953	84.7629	6.65995e-05	0.420249	0.420312		rGO-CNF+Cu Tape	0.267717	0.732283	1.10745e-05	1.10742e-05		8.284	0.635316	0.00329452	0.403626	1.08539e-05	0.596363	2.24481	47.3993	49.6441								8.284	0.607522	4.98685e-05	0.369083	2.48687e-09	0.630917	2.00028	84.0432	86.0435		8.284	0.565128	3.96664e-05	0.31937	1.57342e-09	0.68063	1.67089	86.3607	88.0315
	rGO-CNF+Ti Foil	1.54144	82.5525	84.0939	2.24839e-05	0.328301	0.328311		rGO-CNF+Ti Foil	0.294912	0.705088	3.91952e-06	3.91943e-06		8.305	0.633527	0.00318172	0.401356	1.01233e-05	0.598634	2.22832	47.7185	49.9468								8.305	0.606467	1.93577e-05	0.367802	3.7472e-10	0.632198	1.99147	92.2715	94.2629		8.305	0.564192	2.95889e-05	0.318312	8.75501e-10	0.681688	1.66415	88.9133	90.5774
	rGO-CNF+Ti Mesh	0.872321	57.9846	58.857	0.00198373	0.702534	0.700572		rGO-CNF+Ti Mesh	0.180551	0.819447	0.000335606	0.00033586		8.326	0.631987	0.00311309	0.399408	9.69131e-06	0.600582	2.2142	47.922	50.1362								8.326	0.605499	4.58046e-05	0.36663	2.09806e-09	0.63337	1.98342	84.7984	86.7818		8.326	0.563321	9.1762e-05	0.317331	8.42026e-09	0.682669	1.6579	79.0888	80.7467
	rGO-CNF+Zn Foil	0.992186	84.5362	85.5284	0.000614408	0.335295	0.335535		rGO-CNF+Zn Foil	0.231287	0.768713	2.36444e-05	2.36462e-05		8.347	0.629441	0.00317113	0.396196	1.0056e-05	0.603794	2.19104	47.7847	49.9757								8.347	0.603051	3.6841e-05	0.363671	1.35726e-09	0.636329	1.96318	86.7102	88.6734		8.347	0.561019	4.08935e-05	0.314742	1.67228e-09	0.685258	1.64146	86.1255	87.7669
															8.368	0.626133	0.00313179	0.392042	9.80811e-06	0.607948	2.16127	47.9229	50.0841								8.368	0.599595	4.81866e-05	0.359514	2.32195e-09	0.640486	1.9349	84.4066	86.3415		8.368	0.557702	1.40582e-05	0.311031	1.97633e-10	0.688969	1.61801	95.4234	97.0414
															8.389	0.624782	0.00317543	0.390353	1.00834e-05	0.609637	2.14922	47.8147	49.9639								8.389	0.598485	5.61168e-05	0.358184	3.14909e-09	0.641816	1.9259	83.0923	85.0181		8.389	0.556633	5.85153e-06	0.30984	3.42404e-11	0.69016	1.6105	103.044	104.655
															8.41	0.623307	0.00311574	0.388512	9.70784e-06	0.611478	2.13612	47.9927	50.1288								8.41	0.597578	8.17147e-05	0.357099	6.67729e-09	0.642901	1.91856	79.8354	81.754		8.41	0.555887	5.14853e-05	0.30901	2.65073e-09	0.69099	1.60528	84.1611	85.7663
															8.431	0.621745	0.00312458	0.386567	9.76297e-06	0.613423	2.12233	47.9819	50.1042								8.431	0.596254	7.36234e-05	0.355519	5.42041e-09	0.644481	1.9079	80.7518	82.6597		8.431	0.554843	3.63096e-05	0.307851	1.31839e-09	0.692149	1.598	87.2016	88.7996
															8.452	0.619364	0.00307278	0.383612	9.44199e-06	0.616379	2.10146	48.1479	50.2494								8.452	0.59339	1.65199e-05	0.352112	2.72909e-10	0.647888	1.885	93.7548	95.6398		8.452	0.552231	2.83736e-05	0.304959	8.0506e-10	0.695041	1.5799	89.3618	90.9417
															8.473	0.616928	0.00309442	0.3806	9.57543e-06	0.61939	2.08029	48.1081	50.1884								8.473	0.590476	3.66138e-05	0.348662	1.34057e-09	0.651338	1.86193	86.8652	88.7271		8.473	0.549191	3.44587e-05	0.301611	1.1874e-09	0.698389	1.55903	87.695	89.254
															8.494	0.616534	0.00304788	0.380114	9.28958e-06	0.619877	2.07688	48.2432	50.32								8.494	0.58976	1.47027e-05	0.347817	2.1617e-10	0.652183	1.8563	94.7957	96.652		8.494	0.548547	3.22854e-05	0.300904	1.04235e-09	0.699096	1.55463	88.2653	89.8199
															8.515	0.615767	0.00306226	0.379169	9.37741e-06	0.620822	2.07027	48.2089	50.2792								8.515	0.588947	5.02532e-05	0.346859	2.52539e-09	0.653141	1.84993	84.1268	85.9767		8.515	0.548005	2.42253e-05	0.300309	5.86866e-10	0.699691	1.55094	90.7637	92.3146
															8.536	0.614895	0.0029714	0.378096	8.82919e-06	0.621895	2.06277	48.478	50.5408								8.536	0.587616	7.99734e-05	0.345293	6.39574e-09	0.654707	1.83953	80.1016	81.9411		8.536	0.546747	8.02743e-05	0.298932	6.44397e-09	0.701068	1.5424	80.3661	81.9085
															8.557	0.612739	0.00297899	0.375449	8.87438e-06	0.624542	2.04432	48.4743	50.5186								8.557	0.584349	1.66825e-05	0.341464	2.78307e-10	0.658536	1.8142	93.7406	95.5548		8.557	0.543835	4.02646e-05	0.295757	1.62123e-09	0.704243	1.52277	86.3788	87.9015
															8.578	0.611406	0.00300545	0.373818	9.03274e-06	0.626173	2.03299	48.4088	50.4418								8.578	0.582058	5.2465e-05	0.338791	2.75257e-09	0.661209	1.79661	83.806	85.6026		8.578	0.541381	2.20806e-05	0.293094	4.87551e-10	0.706906	1.50638	91.6134	93.1198
															8.599	0.611208	0.003033	0.373576	9.19909e-06	0.626415	2.03131	48.3312	50.3626								8.599	0.581321	4.96496e-05	0.337934	2.46508e-09	0.662066	1.79099	84.2907	86.0817		8.599	0.54076	7.90063e-05	0.292421	6.24199e-09	0.707579	1.50225	80.5445	82.0468
															8.62	0.610911	0.00301571	0.373212	9.0945e-06	0.626779	2.02879	48.3834	50.4122								8.62	0.580835	5.93224e-05	0.33737	3.51914e-09	0.66263	1.78729	82.7483	84.5356		8.62	0.540287	7.6727e-05	0.29191	5.88703e-09	0.70809	1.49912	80.8019	82.301
															8.641	0.609828	0.00296167	0.37189	8.77148e-06	0.628101	2.01964	48.5496	50.5693								8.641	0.579054	7.02776e-06	0.335303	4.93894e-11	0.664697	1.77376	101.29	103.064		8.641	0.538802	7.63468e-05	0.290307	5.82884e-09	0.709693	1.4893	80.8549	82.3442
															8.662	0.607878	0.00297805	0.369515	8.8688e-06	0.630476	2.00325	48.5181	50.5214								8.662	0.576023	2.96519e-05	0.331802	8.79237e-10	0.668198	1.75095	88.808	90.5589		8.662	0.535889	4.54219e-05	0.287177	2.06315e-09	0.712823	1.47018	85.3845	86.8547
															8.683	0.606681	0.00296348	0.368062	8.78223e-06	0.631929	1.99326	48.5707	50.564								8.683	0.573855	3.5529e-05	0.329309	1.26231e-09	0.670691	1.73478	87.2536	88.9883		8.683	0.533729	2.81701e-05	0.284866	7.93554e-10	0.715134	1.45613	89.5481	91.0042
															8.704	0.60622	0.00293959	0.367502	8.64117e-06	0.632489	1.98941	48.6449	50.6343								8.704	0.573265	2.14644e-05	0.328633	4.60721e-10	0.671367	1.7304	91.6352	93.3656		8.704	0.532955	4.53161e-05	0.284041	2.05355e-09	0.715959	1.45112	85.4238	86.875
															8.725	0.606068	0.00297759	0.367318	8.86601e-06	0.632673	1.98815	48.5346	50.5227								8.725	0.572962	5.61613e-05	0.328285	3.15409e-09	0.671715	1.72815	83.2831	85.0113		8.725	0.532726	6.43297e-05	0.283797	4.13831e-09	0.716203	1.44964	82.3821	83.8318
															8.746	0.605002	0.0030416	0.366027	9.25133e-06	0.633964	1.97929	48.3587	50.338								8.746	0.571276	1.89141e-05	0.326357	3.57742e-10	0.673643	1.7157	92.7486	94.4643		8.746	0.531165	2.13193e-05	0.282136	4.54514e-10	0.717864	1.43958	91.9849	93.4245
															8.767	0.602568	0.00301726	0.363089	9.10384e-06	0.636902	1.95921	48.4485	50.4078								8.767	0.567854	4.61404e-05	0.322458	2.12894e-09	0.677542	1.69064	85.0277	86.7184		8.767	0.527829	3.47773e-05	0.278604	1.20946e-09	0.721396	1.41826	87.7558	89.1741
															8.788	0.601704	0.00302768	0.362047	9.16683e-06	0.637943	1.95212	48.4257	50.3778								8.788	0.566261	2.32293e-05	0.320652	5.39601e-10	0.679348	1.67908	91.0002	92.6793		8.788	0.525964	1.66572e-05	0.276639	2.77461e-10	0.723361	1.40645	94.1615	95.568
															8.809	0.601368	0.00291348	0.361643	8.48835e-06	0.638348	1.94937	48.7624	50.7118								8.809	0.565801	4.34194e-05	0.320131	1.88525e-09	0.679869	1.67575	85.5706	87.2463		8.809	0.52535	3.38067e-05	0.275993	1.1429e-09	0.724007	1.40257	88.0174	89.4199
															8.83	0.600604	0.00288265	0.360725	8.30966e-06	0.639267	1.94312	48.861	50.8042								8.83	0.565049	4.19961e-05	0.31928	1.76367e-09	0.68072	1.67032	85.8655	87.5358		8.83	0.524516	6.40888e-05	0.275117	4.10738e-09	0.724882	1.39732	82.467	83.8644
															8.851	0.599588	0.00292259	0.359506	8.54154e-06	0.640486	1.93485	48.7498	50.6846								8.851	0.563314	3.33843e-05	0.317323	1.11451e-09	0.682677	1.65785	87.8713	89.5291		8.851	0.522984	4.69981e-05	0.273512	2.20882e-09	0.726488	1.38771	85.1707	86.5584
															8.872	0.596835	0.00292058	0.356212	8.52979e-06	0.64378	1.91257	48.778	50.6906								8.872	0.559745	3.85504e-05	0.313314	1.48613e-09	0.686686	1.63242	86.647	88.2794		8.872	0.519353	5.1526e-05	0.269728	2.65493e-09	0.730272	1.36515	84.3943	85.7595
															8.893	0.59637	0.00292251	0.355657	8.54107e-06	0.644335	1.90883	48.7761	50.6849								8.893	0.558507	3.73802e-05	0.31193	1.39728e-09	0.68807	1.62367	86.9235	88.5472		8.893	0.517774	9.75477e-06	0.26809	9.51555e-11	0.73191	1.35542	98.8602	100.216
															8.914	0.595717	0.0029008	0.354879	8.41466e-06	0.645113	1.90359	48.846	50.7496								8.914	0.557788	2.32639e-05	0.311128	5.41209e-10	0.688872	1.61861	91.0477	92.6664		8.914	0.51713	4.62705e-05	0.267423	2.14096e-09	0.732577	1.35147	85.3425	86.6939
															8.935	0.595026	0.00292834	0.354055	8.57516e-06	0.645936	1.89805	48.7695	50.6676								8.935	0.557023	2.95726e-05	0.310274	8.74539e-10	0.689726	1.61323	88.969	90.5822		8.935	0.516188	2.79926e-05	0.26645	7.83585e-10	0.73355	1.3457	89.7134	91.0591
															8.956	0.593383	0.0028751	0.352103	8.26622e-06	0.647888	1.88494	48.942	50.8269								8.956	0.554923	6.31309e-05	0.30794	3.98552e-09	0.69206	1.59856	82.3966	83.9952		8.956	0.514348	3.7983e-05	0.264554	1.44271e-09	0.735446	1.33449	87.0737	88.4082
															8.977	0.590692	0.00287548	0.348917	8.26838e-06	0.651075	1.86363	48.9622	50.8258								8.977	0.551542	2.95928e-05	0.304198	8.75736e-10	0.695802	1.57514	89.0011	90.5763		8.977	0.511016	4.47075e-05	0.261137	1.99876e-09	0.738863	1.31436	85.678	86.9924
															8.998	0.590471	0.00283543	0.348656	8.03966e-06	0.651336	1.8619	49.0857	50.9476								8.998	0.550819	1.29301e-05	0.303402	1.67186e-10	0.696598	1.57018	96.1978	97.768		8.998	0.509915	4.68497e-05	0.260014	2.19489e-09	0.739986	1.30776	85.2781	86.5859
															9.019	0.589491	0.00284388	0.3475	8.08767e-06	0.652492	1.85419	49.0676	50.9218								9.019	0.54999	8.14495e-05	0.302489	6.63403e-09	0.697511	1.56449	80.2177	81.7822		9.019	0.50923	9.43699e-05	0.259316	8.90568e-09	0.740684	1.30367	79.1997	80.5033
															9.04	0.588511	0.00284946	0.346345	8.11941e-06	0.653647	1.84652	49.0582	50.9048								9.04	0.549299	6.75531e-05	0.301729	4.56342e-09	0.698271	1.55976	81.8473	83.4071		9.04	0.508618	7.19589e-05	0.258692	5.17808e-09	0.741308	1.30002	81.5583	82.8583
															9.061	0.586476	0.0027819	0.343954	7.73895e-06	0.656038	1.83066	49.2825	51.1132								9.061	0.547073	2.30824e-06	0.299289	5.32797e-12	0.700711	1.54461	111.19	112.734		9.061	0.506708	6.17441e-05	0.256753	3.81234e-09	0.743247	1.28867	82.8994	84.1881
															9.082	0.583626	0.00286012	0.340619	8.18027e-06	0.659373	1.80864	49.0637	50.8723								9.082	0.543797	5.28019e-05	0.295715	2.78804e-09	0.704285	1.52252	84.0245	85.547		9.082	0.503506	9.18911e-06	0.253518	8.44398e-11	0.746482	1.26981	99.4647	100.735
															9.103	0.583175	0.00276826	0.340093	7.66325e-06	0.6599	1.80517	49.3507	51.1559								9.103	0.543345	2.20297e-05	0.295224	4.85309e-10	0.704776	1.51949	91.6203	93.1398		9.103	0.502744	5.87296e-05	0.252752	3.44917e-09	0.747248	1.26535	83.3575	84.6229
															9.124	0.581946	0.00273903	0.338661	7.5023e-06	0.661331	1.79576	49.4523	51.2481								9.124	0.542697	8.73939e-05	0.29452	7.63769e-09	0.70548	1.51515	79.6552	81.1704		9.124	0.502284	0.000101854	0.252289	1.03742e-08	0.747711	1.26266	78.5778	79.8405
															9.145	0.580554	0.0027607	0.337043	7.62144e-06	0.66295	1.78514	49.3945	51.1796								9.145	0.542047	3.94221e-05	0.293815	1.5541e-09	0.706185	1.51081	86.5744	88.0852		9.145	0.501602	8.52979e-05	0.251604	7.27573e-09	0.748396	1.25869	80.1225	81.3812
															9.166	0.577976	0.00277339	0.334056	7.69169e-06	0.665937	1.76562	49.3742	51.1398								9.166	0.539706	3.34853e-05	0.291282	1.12127e-09	0.708718	1.49527	88.0076	89.5029		9.166	0.499542	7.75034e-05	0.249542	6.00677e-09	0.750458	1.24674	80.9668	82.2136
															9.187	0.574873	0.00270204	0.330479	7.30102e-06	0.669514	1.74236	49.6238	51.3662								9.187	0.536609	2.82776e-05	0.287949	7.99623e-10	0.712051	1.47489	89.4963	90.9711		9.187	0.49641	6.23875e-05	0.246423	3.8922e-09	0.753577	1.22872	82.8693	84.098
															9.208	0.574241	0.00276571	0.329753	7.64917e-06	0.670239	1.73765	49.4262	51.1639								9.208	0.536455	3.62823e-05	0.287784	1.31641e-09	0.712216	1.47389	87.3322	88.8061		9.208	0.495869	4.49954e-05	0.245886	2.02458e-09	0.754114	1.22563	85.711	86.9366
															9.229	0.572767	0.00275884	0.328062	7.61118e-06	0.67193	1.72671	49.4588	51.1855								9.229	0.535927	1.13983e-05	0.287218	1.29922e-10	0.712782	1.47043	97.3927	98.8632		9.229	0.495422	2.74189e-05	0.245443	7.51794e-10	0.754557	1.22308	90.0159	91.239
															9.25	0.571491	0.00274015	0.326602	7.50843e-06	0.673391	1.71728	49.5272	51.2445								9.25	0.53528	4.82857e-05	0.286524	2.3315e-09	0.713476	1.46621	84.8574	86.3236		9.25	0.494791	3.52639e-05	0.244818	1.24354e-09	0.755182	1.21948	87.8339	89.0534
															9.271	0.569237	0.00272433	0.324031	7.422e-06	0.675962	1.70073	49.5941	51.2948								9.271	0.53315	3.61259e-05	0.284249	1.30508e-09	0.715751	1.45238	87.3913	88.8436		9.271	0.492748	6.59314e-05	0.242801	4.34695e-09	0.757199	1.2079	82.4103	83.6182
															9.292	0.566957	0.00272807	0.32144	7.44235e-06	0.678552	1.68412	49.5988	51.2829								9.292	0.53059	4.39753e-05	0.281526	1.93383e-09	0.718474	1.43589	85.6999	87.1358		9.292	0.490226	7.02558e-05	0.240322	4.93588e-09	0.759678	1.1937	81.8727	83.0664
															9.313	0.567358	0.00264123	0.321896	6.97607e-06	0.678097	1.68703	49.8769	51.5639								9.313	0.530738	7.29311e-05	0.281683	5.31894e-09	0.718317	1.43684	81.3049	82.7418		9.313	0.489921	5.71498e-05	0.240023	3.2661e-09	0.759977	1.19199	83.6677	84.8597
															9.334	0.566053	0.00259177	0.320416	6.71727e-06	0.679578	1.67757	50.0505	51.7281								9.334	0.529725	0.000101278	0.280609	1.02572e-08	0.719391	1.43035	78.4594	79.8897		9.334	0.489166	0.000103312	0.239283	1.06735e-08	0.760717	1.18777	78.5292	79.7169
															9.355	0.56554	0.00261977	0.319835	6.86319e-06	0.680158	1.67386	49.9609	51.6347								9.355	0.52916	4.68149e-05	0.28001	2.19163e-09	0.71999	1.42674	85.1656	86.5923		9.355	0.488816	3.61091e-05	0.238941	1.30387e-09	0.761059	1.18582	87.6618	88.8477
															9.376	0.563783	0.00262322	0.317851	6.8813e-06	0.682142	1.66121	49.9621	51.6233								9.376	0.526938	3.32642e-05	0.277663	1.10651e-09	0.722337	1.4126	88.1479	89.5605		9.376	0.487059	7.68848e-05	0.237226	5.91127e-09	0.762774	1.17604	81.1072	82.2832
															9.397	0.562248	0.00264469	0.316123	6.9944e-06	0.68387	1.65022	49.9023	51.5525								9.397	0.524986	6.84075e-05	0.275611	4.67959e-09	0.724389	1.40028	81.8976	83.2979		9.397	0.484966	3.33966e-06	0.235192	1.11534e-11	0.764808	1.16447	108.361	109.526
															9.418	0.562442	0.00268562	0.316341	7.21253e-06	0.683652	1.6516	49.7675	51.4191								9.418	0.524685	3.41292e-05	0.275295	1.1648e-09	0.724705	1.39839	87.9391	89.3375		9.418	0.484714	8.95869e-05	0.234948	8.0258e-09	0.765052	1.16309	79.792	80.9551
															9.439	0.561554	0.00263321	0.315343	6.93382e-06	0.68465	1.64527	49.945	51.5903								9.439	0.523932	4.91788e-05	0.274505	2.41855e-09	0.725495	1.39366	84.7708	86.1644		9.439	0.484217	4.9455e-05	0.234466	2.4458e-09	0.765534	1.16036	84.9554	86.1158
															9.46	0.561402	0.00264136	0.315173	6.97679e-06	0.68482	1.64419	49.9193	51.5634								9.46	0.523399	4.19095e-05	0.273946	1.7564e-09	0.726054	1.39031	86.1634	87.5538		9.46	0.484087	2.86677e-05	0.23434	8.21838e-10	0.76566	1.15964	89.6925	90.8521
															9.481	0.560015	0.00256034	0.313617	6.55535e-06	0.686377	1.63433	50.1997	51.834								9.481	0.521548	5.76701e-05	0.272012	3.32584e-09	0.727988	1.37876	83.4022	84.781		9.481	0.482655	0.000107155	0.232956	1.14822e-08	0.767044	1.1518	78.248	79.3997
															9.502	0.559111	0.00259547	0.312606	6.73648e-06	0.687388	1.62794	50.0877	51.7157								9.502	0.520016	3.08979e-05	0.270417	9.54679e-10	0.729583	1.36925	88.8322	90.2014		9.502	0.481215	5.21783e-05	0.231568	2.72258e-09	0.768432	1.14394	84.5063	85.6502
															9.523	0.559357	0.00258465	0.312881	6.68044e-06	0.687113	1.62968	50.1223	51.752								9.523	0.519514	1.77488e-05	0.269894	3.1502e-10	0.730106	1.36614	93.6505	95.0166		9.523	0.48095	4.0921e-05	0.231313	1.67453e-09	0.768687	1.1425	86.6186	87.7611
															9.544	0.559036	0.00261406	0.312521	6.83331e-06	0.687472	1.62741	50.0263	51.6537								9.544	0.519208	5.18901e-05	0.269577	2.69259e-09	0.730423	1.36425	84.334	85.6983		9.544	0.480843	0.000131286	0.23121	1.7236e-08	0.76879	1.14192	76.4937	77.6356
															9.565	0.559314	0.00259776	0.312832	6.74836e-06	0.687161	1.62937	50.0787	51.708								9.565	0.518872	4.68598e-05	0.269228	2.19584e-09	0.730772	1.36218	85.2218	86.584		9.565	0.481003	7.01458e-05	0.231364	4.92043e-09	0.768636	1.14279	81.9372	83.08
															9.586	0.557865	0.00258936	0.311213	6.70477e-06	0.68878	1.61915	50.117	51.7362								9.586	0.516998	3.62357e-05	0.267287	1.31302e-09	0.732713	1.35066	87.4666	88.8173		9.586	0.479512	7.83603e-05	0.229932	6.14033e-09	0.770068	1.13471	80.9834	82.1181
															9.607	0.557293	0.00250986	0.310575	6.29938e-06	0.689418	1.61513	50.3919	52.007								9.607	0.515617	2.31766e-05	0.265861	5.37154e-10	0.734139	1.34222	91.3568	92.699		9.607	0.478313	1.70529e-05	0.228783	2.90803e-10	0.771217	1.12824	94.2358	95.364
															9.628	0.557245	0.00255044	0.310522	6.50475e-06	0.689472	1.61479	50.2529	51.8677								9.628	0.515081	4.31628e-05	0.265309	1.86303e-09	0.734691	1.33895	85.9589	87.2978		9.628	0.478149	2.13187e-05	0.228626	4.54489e-10	0.771374	1.12735	92.2974	93.4248
															9.649	0.556954	0.00251599	0.310198	6.33022e-06	0.689796	1.61275	50.3731	51.9858								9.649	0.514378	3.20534e-05	0.264585	1.02742e-09	0.735415	1.33467	88.5478	89.8825		9.649	0.477942	4.17171e-05	0.228428	1.74032e-09	0.771572	1.12624	86.4675	87.5937
															9.67	0.556856	0.00253141	0.310089	6.40802e-06	0.689905	1.61207	50.3207	51.9328								9.67	0.513685	6.5493e-05	0.263872	4.28933e-09	0.736128	1.33047	82.3456	83.6761		9.67	0.477888	4.08654e-05	0.228377	1.66998e-09	0.771623	1.12595	86.6469	87.7729
															9.691	0.555289	0.00251172	0.308346	6.30873e-06	0.691648	1.60111	50.3995	52.0006								9.691	0.511393	5.00285e-05	0.261523	2.50285e-09	0.738477	1.31663	84.699	86.0156		9.691	0.476247	5.05038e-05	0.226811	2.55064e-09	0.773189	1.11714	84.8164	85.9335
															9.712	0.554693	0.00259401	0.307684	6.72887e-06	0.692309	1.59696	50.1236	51.7206								9.712	0.509756	4.37207e-05	0.259851	1.9115e-09	0.740149	1.30681	85.8795	87.1863		9.712	0.475532	6.13171e-05	0.22613	3.75979e-09	0.77387	1.11332	83.135	84.2484
															9.733	0.554455	0.00254072	0.30742	6.45524e-06	0.692573	1.5953	50.3056	51.9009								9.733	0.508641	6.37973e-05	0.258716	4.07009e-09	0.741284	1.30015	82.6038	83.904		9.733	0.475193	8.81048e-06	0.225809	7.76246e-11	0.774191	1.11152	99.9885	101.1
															9.754	0.553926	0.00245022	0.306834	6.0036e-06	0.69316	1.59163	50.6243	52.2159								9.754	0.507286	0.000150004	0.257339	2.25012e-08	0.74266	1.2921	75.1859	76.4779		9.754	0.474754	3.56656e-05	0.225392	1.27203e-09	0.774608	1.10918	87.8458	88.955
															9.775	0.553497	0.00249875	0.306359	6.24377e-06	0.693635	1.58865	50.4569	52.0455								9.775	0.505737	2.75544e-05	0.25577	7.59244e-10	0.74423	1.28293	89.9133	91.1962		9.775	0.474541	4.93305e-05	0.225189	2.4335e-09	0.774811	1.10804	85.0296	86.1377
															9.796	0.551781	0.00244478	0.304462	5.97695e-06	0.695532	1.57679	50.6584	52.2352								9.796	0.502663	4.99151e-05	0.25267	2.49151e-09	0.74733	1.26487	84.7705	86.0354		9.796	0.472749	2.92551e-05	0.223491	8.5586e-10	0.776509	1.09854	89.5774	90.676
															9.817	0.55103	0.00241762	0.303634	5.8449e-06	0.69636	1.57162	50.7606	52.3322								9.817	0.500561	1.89481e-05	0.250562	3.5903e-10	0.749438	1.25264	93.1961	94.4487		9.817	0.472031	5.30799e-05	0.222814	2.81748e-09	0.777186	1.09475	84.4066	85.5014
															9.838	0.549823	0.00245889	0.302306	6.04615e-06	0.697688	1.56335	50.6219	52.1852								9.838	0.49793	4.13375e-05	0.247934	1.70879e-09	0.752066	1.23744	86.4357	87.6731		9.838	0.470922	4.08694e-05	0.221767	1.67031e-09	0.778233	1.0889	86.6831	87.772
															9.859	0.549737	0.00246713	0.302211	6.08672e-06	0.697783	1.56276	50.5934	52.1562								9.859	0.496577	4.57538e-05	0.246588	2.09341e-09	0.753412	1.22968	85.5618	86.7915		9.859	0.470803	9.11587e-05	0.221656	8.30991e-09	0.778344	1.08828	79.7158	80.804
															9.88	0.549209	0.00245241	0.301631	6.0143e-06	0.698363	1.55915	50.649	52.2081								9.88	0.494804	4.10108e-05	0.244831	1.68189e-09	0.755169	1.21956	86.5225	87.742		9.88	0.470365	0.000100605	0.221243	1.01213e-08	0.778757	1.08598	78.8616	79.9476
															9.901	0.547924	0.00241957	0.300221	5.85433e-06	0.699773	1.55039	50.7748	52.3252								9.901	0.492171	6.0056e-05	0.242232	3.60672e-09	0.757768	1.20464	83.2242	84.4289		9.901	0.468577	0.000144678	0.219565	2.09318e-08	0.780435	1.07663	75.7153	76.7919
															9.922	0.548105	0.002456	0.300419	6.03196e-06	0.699575	1.55162	50.6438	52.1954								9.922	0.491221	2.58527e-05	0.241298	6.68363e-10	0.758702	1.19929	90.5506	91.7499		9.922	0.468492	9.2457e-05	0.219484	8.54829e-09	0.780516	1.07618	79.605	80.6812
															9.943	0.547886	0.00240235	0.300179	5.77127e-06	0.699816	1.55013	50.8372	52.3873								9.943	0.489942	3.55406e-06	0.240043	1.26313e-11	0.759957	1.19211	107.793	108.986		9.943	0.467336	5.36901e-05	0.218403	2.88263e-09	0.781597	1.07017	84.3319	85.4021
															9.964	0.548512	0.00238846	0.300866	5.70475e-06	0.699129	1.55439	50.8832	52.4376								9.964	0.48958	4.89523e-05	0.239689	2.39633e-09	0.760311	1.19009	85.0145	86.2045		9.964	0.466614	3.99816e-05	0.217728	1.59853e-09	0.782272	1.06642	86.8964	87.9628
															9.985	0.549044	0.00236992	0.301449	5.61652e-06	0.698545	1.55802	50.9473	52.5053								9.985	0.489121	3.34561e-05	0.239239	1.11931e-09	0.760761	1.18752	88.323	89.5105		9.985	0.46559	0.000123073	0.216774	1.51469e-08	0.783226	1.06113	77.1356	78.1968
															10.006	0.548641	0.00238014	0.301007	5.66508e-06	0.698987	1.55527	50.9127	52.4679								10.006	0.488057	3.15488e-05	0.2382	9.95327e-10	0.7618	1.18159	88.8388	90.0203		10.006	0.463115	0.000118405	0.214475	1.40197e-08	0.785525	1.0484	77.4842	78.5326
															10.027	0.550969	0.00239735	0.303567	5.7473e-06	0.696427	1.57121	50.8342	52.4054								10.027	0.489526	5.60871e-05	0.239636	3.14576e-09	0.760364	1.18978	83.833	85.0227		10.027	0.462831	0.000143541	0.214212	2.06041e-08	0.785788	1.04695	75.8135	76.8605
															10.048	0.550859	0.00235869	0.303445	5.56344e-06	0.696549	1.57045	50.9761	52.5466								10.048	0.488671	1.82631e-05	0.238799	3.3354e-10	0.761201	1.18501	93.5835	94.7685		10.048	0.459971	0.000109898	0.211573	1.20776e-08	0.788427	1.03239	78.1478	79.1802
															10.069	0.552817	0.00238989	0.305607	5.71158e-06	0.694387	1.58395	50.8485	52.4324								10.069	0.489815	3.34257e-05	0.239919	1.11728e-09	0.760081	1.1914	88.327	89.5184		10.069	0.458633	9.02144e-05	0.210344	8.13864e-09	0.789656	1.02562	79.8689	80.8945
															10.09	0.55425	0.00230818	0.307193	5.3277e-06	0.692802	1.59388	51.1407	52.7346								10.09	0.490564	3.55923e-05	0.240653	1.26681e-09	0.759347	1.1956	87.7773	88.9729		10.09	0.456981	0.000110025	0.208831	1.21054e-08	0.791169	1.01731	78.1529	79.1702
															10.111	0.554775	0.0023783	0.307776	5.65629e-06	0.692219	1.59753	50.8772	52.4747								10.111	0.490639	1.73943e-05	0.240727	3.02561e-10	0.759273	1.19602	93.9958	95.1919		10.111	0.454396	0.000141647	0.206475	2.00639e-08	0.793525	1.0044	75.9715	76.9759
															10.132	0.556297	0.00229562	0.309467	5.26986e-06	0.690528	1.60815	51.1739	52.782								10.132	0.492244	2.18055e-05	0.242304	4.75481e-10	0.757696	1.20505	92.0236	93.2287		10.132	0.453981	0.000137605	0.206099	1.8935e-08	0.793901	1.00233	76.225	77.2273
															10.153	0.556132	0.00236897	0.309283	5.61202e-06	0.690711	1.607	50.9018	52.5088								10.153	0.492161	2.07776e-05	0.242222	4.3171e-10	0.757778	1.20458	92.4435	93.6481		10.153	0.452127	0.000131186	0.204419	1.72098e-08	0.795581	0.993157	76.6491	77.6422
															10.174	0.557005	0.00233809	0.310255	5.46666e-06	0.68974	1.61311	51.0097	52.6228								10.174	0.493316	4.71474e-05	0.243361	2.22288e-09	0.756639	1.21111	85.3197	86.5308		10.174	0.451765	0.000154173	0.204091	2.37693e-08	0.795909	0.991367	75.2485	76.2398
															10.195	0.556406	0.0023692	0.309587	5.61311e-06	0.690407	1.60891	50.8991	52.508								10.195	0.493622	8.00267e-05	0.243663	6.40427e-09	0.756337	1.21284	80.7225	81.9353		10.195	0.451119	0.000110043	0.203509	1.21094e-08	0.796491	0.98819	78.1806	79.1688
															10.216	0.553869	0.00235541	0.306771	5.54796e-06	0.693224	1.59123	50.9674	52.5587								10.216	0.492654	1.02668e-05	0.242708	1.05406e-10	0.757292	1.20737	98.564	99.7713		10.216	0.449427	6.08614e-05	0.201984	3.70411e-09	0.798015	0.979887	83.3333	84.3132
															10.237	0.552379	0.00237895	0.305123	5.65942e-06	0.694872	1.58092	50.8914	52.4723								10.237	0.493233	1.7121e-05	0.243278	2.93127e-10	0.756722	1.21064	94.1188	95.3294		10.237	0.449826	0.000105504	0.202344	1.11312e-08	0.797656	0.981841	78.5528	79.5346
															10.258	0.54783	0.00239968	0.300117	5.75846e-06	0.699877	1.54975	50.8472	52.3969								10.258	0.491192	6.35676e-05	0.24127	4.04084e-09	0.75873	1.19913	82.7362	83.9353		10.258	0.44784	0.000101829	0.200561	1.03692e-08	0.799439	0.972147	78.8704	79.8425
															10.279	0.545196	0.00232825	0.297239	5.42076e-06	0.702756	1.53192	51.1275	52.6594								10.279	0.490545	5.74874e-05	0.240635	3.3048e-09	0.759365	1.19549	83.6131	84.8086		10.279	0.447271	5.11861e-05	0.200051	2.62001e-09	0.799949	0.969378	84.8476	85.817
															10.3	0.541441	0.00239297	0.293158	5.72632e-06	0.706836	1.50678	50.9145	52.4212								10.3	0.488729	3.24602e-05	0.238856	1.05366e-09	0.761144	1.18533	88.5877	89.773		10.3	0.445869	8.76693e-05	0.1988	7.68591e-09	0.8012	0.962588	80.1805	81.143
															10.321	0.537908	0.0023969	0.289346	5.74514e-06	0.710649	1.48342	50.9236	52.407								10.321	0.486777	3.35457e-05	0.236952	1.12532e-09	0.763048	1.17448	88.3128	89.4873		10.321	0.444362	0.000117888	0.197458	1.38975e-08	0.802542	0.95532	77.6153	78.5706
															10.342	0.534812	0.00233576	0.286024	5.45575e-06	0.713971	1.46316	51.1683	52.6315								10.342	0.485198	1.0636e-05	0.235417	1.13125e-10	0.764583	1.16575	98.2987	99.4644		10.342	0.443442	7.74745e-05	0.196641	6.00231e-09	0.803359	0.950902	81.2659	82.2168
															10.363	0.530975	0.00227622	0.281934	5.18116e-06	0.718061	1.43836	51.4174	52.8557								10.363	0.482131	3.64502e-05	0.23245	1.32862e-09	0.76755	1.14893	87.6171	88.766		10.363	0.441295	9.30838e-05	0.194741	8.6646e-09	0.805259	0.940644	79.6819	80.6225
															10.384	0.529315	0.00231019	0.280175	5.33698e-06	0.71982	1.42773	51.2993	52.727								10.384	0.480542	1.86436e-05	0.23092	3.47583e-10	0.76908	1.14029	93.4491	94.5894		10.384	0.440241	4.20197e-05	0.193812	1.76566e-09	0.806188	0.935635	86.5953	87.5309
															10.405	0.526895	0.00227061	0.277618	5.15565e-06	0.722377	1.41233	51.4648	52.8772								10.405	0.47801	3.53743e-05	0.228494	1.25134e-09	0.771506	1.12661	87.8996	89.0262		10.405	0.438512	7.38627e-05	0.192293	5.45571e-09	0.807707	0.927461	81.704	82.6315
															10.426	0.525222	0.0023172	0.275858	5.3694e-06	0.724137	1.40176	51.299	52.7007								10.426	0.476469	3.36343e-05	0.227022	1.13126e-09	0.772978	1.11833	88.346	89.4644		10.426	0.43721	2.73102e-05	0.191153	7.45847e-10	0.808847	0.921335	90.3522	91.2735
															10.447	0.523494	0.00224601	0.274046	5.04455e-06	0.725949	1.39091	51.5809	52.9718								10.447	0.474746	1.8188e-05	0.225384	3.30802e-10	0.774616	1.10913	93.6952	94.8043		10.447	0.435833	7.48152e-05	0.18995	5.59732e-09	0.81005	0.914882	81.6053	82.5202
															10.468	0.520825	0.00225066	0.271258	5.06545e-06	0.728737	1.37426	51.5796	52.9538								10.468	0.471952	4.66973e-05	0.222739	2.18064e-09	0.777261	1.09433	85.5198	86.6142		10.468	0.43328	8.74886e-05	0.187732	7.65426e-09	0.812268	0.903006	80.258	81.161
															10.489	0.52021	0.00225178	0.270618	5.07053e-06	0.729377	1.37045	51.579	52.9495								10.489	0.470438	1.10735e-05	0.221312	1.22623e-10	0.778688	1.08637	98.0279	99.1143		10.489	0.43164	3.31036e-05	0.186313	1.09585e-09	0.813687	0.895425	88.7071	89.6025
															10.51	0.519063	0.00222917	0.269426	4.96921e-06	0.730569	1.36336	51.6738	53.0371								10.51	0.468717	2.22098e-05	0.219695	4.93277e-10	0.780305	1.07736	91.9917	93.0691		10.51	0.42975	3.9818e-05	0.184685	1.58548e-09	0.815315	0.886746	87.1117	87.9984
															10.531	0.517829	0.00217477	0.268146	4.7296e-06	0.731849	1.35576	51.896	53.2518								10.531	0.467393	6.26187e-06	0.218456	3.9211e-11	0.781544	1.07046	102.995	104.066		10.531	0.427708	1.01566e-05	0.182934	1.03157e-10	0.817066	0.877429	98.9876	99.865
															10.552	0.516303	0.00216589	0.266568	4.69109e-06	0.733427	1.3464	51.9409	53.2873								10.552	0.465936	2.9121e-05	0.217096	8.48035e-10	0.782904	1.06291	89.6529	90.7159		10.552	0.425677	3.07431e-05	0.181201	9.45141e-10	0.818799	0.868227	89.3768	90.245
															10.573	0.514607	0.00219366	0.264821	4.81216e-06	0.735174	1.33607	51.8405	53.1766								10.573	0.463851	3.8446e-05	0.215158	1.47809e-09	0.784842	1.05218	87.2508	88.303		10.573	0.422876	1.72359e-05	0.178824	2.97075e-10	0.821176	0.855636	94.4157	95.2713
															10.594	0.513951	0.00217227	0.264146	4.71874e-06	0.73585	1.33208	51.9297	53.2617								10.594	0.462641	1.8025e-05	0.214037	3.24899e-10	0.785963	1.04598	93.8365	94.8825		10.594	0.420656	5.10279e-05	0.176951	2.60384e-09	0.823049	0.845744	84.9981	85.8439
															10.615	0.513072	0.00213811	0.263243	4.57152e-06	0.736752	1.32676	52.0726	53.3994								10.615	0.461396	4.45091e-05	0.212886	1.98106e-09	0.787114	1.03962	85.9914	87.031		10.615	0.41851	5.198e-05	0.175151	2.70192e-09	0.824849	0.836255	84.847	85.6833
															10.636	0.511215	0.00218973	0.261341	4.7949e-06	0.738654	1.31556	51.8766	53.1922								10.636	0.459826	5.51686e-05	0.21144	3.04358e-09	0.78856	1.03165	84.1345	85.1662		10.636	0.415837	7.07269e-05	0.17292	5.00229e-09	0.82708	0.824525	82.1838	83.0083
															10.657	0.509997	0.00218733	0.260097	4.78441e-06	0.739898	1.30825	51.8935	53.2017								10.657	0.45909	2.97975e-05	0.210764	8.87891e-10	0.789236	1.02793	89.4885	90.5164		10.657	0.414213	9.5001e-05	0.171573	9.0252e-09	0.828427	0.817455	79.628	80.4454
															10.678	0.508119	0.00206495	0.258185	4.26403e-06	0.741811	1.29704	52.4048	53.7018								10.678	0.457428	1.49613e-05	0.20924	2.2384e-10	0.79076	1.01955	95.4811	96.5006		10.678	0.411464	1.60444e-05	0.169303	2.57422e-10	0.830697	0.805571	95.088	95.8935
															10.699	0.507235	0.00216741	0.257287	4.69765e-06	0.742708	1.29179	51.9894	53.2812								10.699	0.456481	8.57545e-05	0.208375	7.35384e-09	0.791625	1.0148	80.3201	81.3349		10.699	0.409596	5.89538e-05	0.167769	3.47555e-09	0.832231	0.79756	83.7922	84.5898
															10.72	0.504965	0.00217233	0.25499	4.71902e-06	0.745006	1.27838	51.9831	53.2615								10.72	0.454848	1.56285e-05	0.206886	2.44251e-10	0.793114	1.00665	95.115	96.1216		10.72	0.406925	8.45701e-05	0.165588	7.1521e-09	0.834412	0.786196	80.6695	81.4557
															10.741	0.503133	0.00208441	0.253143	4.34477e-06	0.746852	1.26763	52.3527	53.6203								10.741	0.453853	4.40741e-05	0.205982	1.94253e-09	0.794018	1.0017	86.1146	87.1163		10.741	0.405038	1.92761e-05	0.164056	3.71569e-10	0.835944	0.778227	93.5214	94.2996
															10.762	0.501254	0.0021189	0.251256	4.48974e-06	0.748739	1.25667	52.2211	53.4778								10.762	0.453123	5.3318e-05	0.205321	2.84281e-09	0.794679	0.99808	84.4644	85.4625		10.762	0.403709	6.32773e-05	0.162981	4.00401e-09	0.837019	0.772648	83.2024	83.975
															10.783	0.498995	0.00207309	0.248996	4.29771e-06	0.751	1.24358	52.424	53.6676								10.783	0.451471	3.06949e-05	0.203826	9.42176e-10	0.796174	0.989918	89.2688	90.2587		10.783	0.401474	5.4784e-05	0.161181	3.00129e-09	0.838819	0.763319	84.4636	85.2269
															10.804	0.498021	0.00210049	0.248025	4.41207e-06	0.751971	1.23797	52.3156	53.5536								10.804	0.450702	7.28046e-05	0.203132	5.30051e-09	0.796868	0.986136	81.7707	82.7568		10.804	0.400294	3.71046e-05	0.160235	1.37675e-09	0.839765	0.758423	87.853	88.6115
															10.825	0.495963	0.00208789	0.245979	4.35928e-06	0.754016	1.22617	52.3797	53.6059								10.825	0.449456	1.79744e-05	0.202011	3.23079e-10	0.797989	0.980028	93.9269	94.9069		10.825	0.398712	3.50283e-05	0.158971	1.22698e-09	0.841029	0.751893	88.3597	89.1116
															10.846	0.494209	0.00209509	0.244243	4.3894e-06	0.755753	1.21618	52.3598	53.5759								10.846	0.44858	2.54224e-05	0.201224	6.46297e-10	0.798776	0.975752	90.9199	91.8957		10.846	0.397396	3.47028e-05	0.157924	1.20428e-09	0.842076	0.746486	88.4462	89.1927
															10.867	0.492788	0.00207682	0.24284	4.31316e-06	0.757155	1.20813	52.4439	53.652								10.867	0.447998	3.72817e-05	0.200703	1.38992e-09	0.799297	0.972916	87.5972	88.5701		10.867	0.396938	9.45458e-06	0.15756	8.9389e-11	0.84244	0.744609	99.7426	100.487
															10.888	0.491027	0.00205465	0.241107	4.22157e-06	0.758888	1.1982	52.5471	53.7453								10.888	0.446628	8.17873e-05	0.199476	6.68916e-09	0.800524	0.966257	80.78	81.7463		10.888	0.395499	8.08648e-05	0.156419	6.53911e-09	0.843581	0.738734	81.1061	81.8448
															10.909	0.490136	0.002018	0.240233	4.07233e-06	0.759763	1.1932	52.7084	53.9016								10.909	0.445728	3.15201e-05	0.198673	9.93517e-10	0.801327	0.961904	89.0663	90.0282		10.909	0.394653	3.97888e-05	0.155751	1.58315e-09	0.844249	0.735293	87.2695	88.0048
															10.93	0.48864	0.00198924	0.238769	3.95709e-06	0.761227	1.18483	52.8414	54.0262								10.93	0.444707	5.69975e-05	0.197765	3.24872e-09	0.802235	0.956982	83.9259	84.8829		10.93	0.393705	1.04558e-05	0.155004	1.09323e-10	0.844996	0.731453	98.8814	99.6129
															10.951	0.487837	0.00202392	0.237985	4.09624e-06	0.762011	1.18037	52.6958	53.8761								10.951	0.444392	2.9675e-05	0.197485	8.80604e-10	0.802515	0.955467	89.5967	90.5522		10.951	0.393483	5.6704e-05	0.154829	3.21534e-09	0.845171	0.730553	84.1972	84.9277
															10.972	0.486543	0.00199798	0.236724	3.99193e-06	0.763272	1.17318	52.815	53.9882								10.972	0.443744	1.80709e-05	0.196908	3.26557e-10	0.803092	0.952349	93.9081	94.8604		10.972	0.39304	2.33943e-05	0.154481	5.47295e-10	0.845519	0.728765	91.889	92.6178
															10.993	0.485551	0.00200659	0.23576	4.02639e-06	0.764236	1.1677	52.7831	53.9508								10.993	0.442458	2.49157e-05	0.195769	6.20793e-10	0.804231	0.946194	91.1243	92.0705		10.993	0.391933	2.83423e-05	0.153612	8.03284e-10	0.846388	0.724304	90.227	90.9513
															11.014	0.485096	0.00195716	0.235318	3.83048e-06	0.764678	1.16519	53.0023	54.1675								11.014	0.441728	2.70863e-05	0.195124	7.3367e-10	0.804876	0.942709	90.4023	91.345		11.014	0.391354	4.63374e-05	0.153158	2.14715e-09	0.846842	0.721975	85.9594	86.6814
															11.035	0.484146	0.00194522	0.234397	3.7839e-06	0.765599	1.15997	53.0606	54.2206								11.035	0.440797	3.44021e-05	0.194302	1.1835e-09	0.805698	0.938279	88.33	89.2683		11.035	0.390653	3.60453e-05	0.15261	1.29927e-09	0.84739	0.719166	88.1439	88.863
															11.056	0.483149	0.00191931	0.233433	3.68377e-06	0.766564	1.1545	53.1826	54.3371								11.056	0.440224	1.66564e-05	0.193797	2.77434e-10	0.806203	0.935555	94.6328	95.5684		11.056	0.390064	4.56773e-05	0.15215	2.08642e-09	0.84785	0.716808	86.0892	86.806
															11.077	0.482435	0.00193634	0.232743	3.74942e-06	0.767253	1.15059	53.1098	54.2604								11.077	0.439587	2.26349e-05	0.193237	5.12337e-10	0.806763	0.932541	91.9719	92.9044		11.077	0.389972	7.30645e-06	0.152078	5.33842e-11	0.847922	0.716442	102.009	102.726
															11.098	0.482136	0.00190619	0.232455	3.63356e-06	0.767541	1.14896	53.2477	54.3967								11.098	0.439085	2.72417e-05	0.192796	7.42109e-10	0.807204	0.930166	90.3652	91.2953		11.098	0.389463	7.83533e-05	0.151682	6.13924e-09	0.848318	0.714411	81.4044	82.1189
															11.119	0.481853	0.00191976	0.232182	3.68548e-06	0.767814	1.14742	53.1876	54.3351								11.119	0.438622	1.35752e-05	0.192389	1.84287e-10	0.807611	0.927979	96.4171	97.345		11.119	0.389112	9.14498e-05	0.151408	8.36307e-09	0.848592	0.71301	80.0633	80.7763
															11.14	0.481063	0.00195625	0.231422	3.82692e-06	0.768574	1.14312	53.0284	54.1715								11.14	0.437725	1.59518e-05	0.191603	2.5446e-10	0.808397	0.923752	95.0201	95.9438		11.14	0.388534	3.29896e-05	0.150959	1.08831e-09	0.849041	0.710712	88.9218	89.6325
															11.161	0.480268	0.00186975	0.230658	3.49595e-06	0.769339	1.1388	53.4255	54.5643								11.161	0.437323	5.55144e-05	0.191251	3.08185e-09	0.808749	0.921865	84.19	85.1119		11.161	0.388234	5.91186e-05	0.150725	3.49501e-09	0.849275	0.709519	83.856	84.5655
															11.182	0.479405	0.00185283	0.22983	3.43298e-06	0.770167	1.13413	53.5092	54.6433								11.182	0.436602	2.20377e-05	0.190621	4.85662e-10	0.809379	0.918483	92.2182	93.1367		11.182	0.387846	3.49712e-05	0.150425	1.22299e-09	0.849575	0.707982	88.4178	89.1258
															11.203	0.479023	0.00178728	0.229463	3.19437e-06	0.770534	1.13206	53.8241	54.9561								11.203	0.43571	2.55229e-05	0.189843	6.5142e-10	0.810157	0.914309	90.9471	91.8614		11.203	0.387035	2.81674e-05	0.149796	7.93403e-10	0.850204	0.704768	90.3003	91.0051
															11.224	0.478672	0.00181754	0.229127	3.30346e-06	0.77087	1.13017	53.6801	54.8103								11.224	0.435174	2.88672e-05	0.189376	8.33314e-10	0.810624	0.911806	89.8801	90.7919		11.224	0.386656	5.77757e-05	0.149503	3.33804e-09	0.850497	0.703273	84.0618	84.7651
															11.245	0.478046	0.0018573	0.228528	3.44956e-06	0.771468	1.1268	53.4956	54.6224								11.245	0.434417	2.05312e-05	0.188718	4.21531e-10	0.811282	0.908281	92.8434	93.7517		11.245	0.386054	4.40941e-05	0.149038	1.94429e-09	0.850962	0.700897	86.4115	87.1124
															11.266	0.476949	0.00186837	0.227481	3.4908e-06	0.772516	1.12091	53.4498	54.5707								11.266	0.433523	4.44229e-05	0.187943	1.97339e-09	0.812057	0.904133	86.1437	87.0479		11.266	0.385484	7.44101e-05	0.148598	5.53687e-09	0.851402	0.698653	81.8687	82.5674
															11.287	0.475854	0.00183914	0.226437	3.38244e-06	0.77356	1.11504	53.5927	54.7077								11.287	0.432466	4.26909e-05	0.187027	1.82251e-09	0.812973	0.899236	86.4941	87.3933		11.287	0.384644	6.88625e-05	0.147951	4.74205e-09	0.852049	0.695353	82.545	83.2403
															11.308	0.475741	0.00184092	0.226329	3.389e-06	0.773667	1.11444	53.5848	54.6993								11.308	0.431796	4.58684e-05	0.186447	2.10391e-09	0.813553	0.896144	85.8736	86.7697		11.308	0.384168	9.42018e-05	0.147585	8.87398e-09	0.852415	0.69349	79.8253	80.5188
															11.329	0.47568	0.00181948	0.226272	3.31052e-06	0.773725	1.11411	53.6869	54.801								11.329	0.431294	3.0196e-05	0.186015	9.11797e-10	0.813985	0.893835	89.5072	90.401		11.329	0.383943	4.26332e-05	0.147412	1.81759e-09	0.852588	0.69261	86.7124	87.405
															11.35	0.474833	0.00189447	0.225466	3.58903e-06	0.77453	1.1096	53.3406	54.4502								11.35	0.430317	2.64211e-05	0.185173	6.98074e-10	0.814827	0.889344	90.6716	91.561		11.35	0.383079	4.33293e-05	0.146749	1.87743e-09	0.853251	0.689233	86.5751	87.2644
															11.371	0.473893	0.00178538	0.224575	3.18757e-06	0.775422	1.1046	53.8608	54.9654								11.371	0.429419	3.72888e-05	0.1844	1.39045e-09	0.8156	0.88523	87.6832	88.5684		11.371	0.382813	3.73639e-05	0.146546	1.39606e-09	0.853454	0.688197	87.8628	88.551
															11.392	0.47288	0.00182317	0.223616	3.32395e-06	0.776381	1.09923	53.6842	54.7835								11.392	0.42813	2.11851e-05	0.183295	4.48808e-10	0.816705	0.87935	92.6	93.4794		11.392	0.381954	1.63632e-05	0.145889	2.67755e-10	0.854111	0.684857	95.0378	95.7226
															11.413	0.473071	0.00183745	0.223796	3.37621e-06	0.776201	1.10024	53.6155	54.7157								11.413	0.427474	2.69148e-05	0.182734	7.24406e-10	0.817266	0.876368	90.5238	91.4002		11.413	0.381574	8.73249e-05	0.145599	7.62563e-09	0.854401	0.683381	80.4939	81.1772
															11.434	0.472428	0.00179179	0.223188	3.21051e-06	0.776809	1.09684	53.8374	54.9343								11.434	0.426347	2.91022e-05	0.181772	8.46935e-10	0.818228	0.871257	89.8502	90.7215		11.434	0.380729	3.01947e-05	0.144954	9.11722e-10	0.855046	0.680107	89.7213	90.4014
															11.455	0.471414	0.00177951	0.222232	3.16666e-06	0.777765	1.0915	53.9025	54.994								11.455	0.425095	5.68625e-05	0.180706	3.23335e-09	0.819294	0.865602	84.0379	84.9035		11.455	0.379767	8.83634e-06	0.144223	7.80809e-11	0.855777	0.676393	100.398	101.075
															11.476	0.470384	0.00171644	0.221261	2.94617e-06	0.778736	1.08608	54.2213	55.3074								11.476	0.424295	7.73486e-05	0.180026	5.9828e-09	0.819974	0.862	81.369	82.231		11.476	0.379354	4.98365e-05	0.143909	2.48368e-09	0.856091	0.674803	85.3742	86.049
															11.497	0.469703	0.00173266	0.220621	3.0021e-06	0.779376	1.08251	54.1432	55.2257								11.497	0.423356	7.0642e-05	0.17923	4.99029e-09	0.82077	0.857787	82.161	83.0187		11.497	0.378624	9.74802e-06	0.143356	9.50239e-11	0.856644	0.671996	99.5497	100.222
															11.518	0.46958	0.00164264	0.220505	2.69828e-06	0.779492	1.08187	54.6073	55.6891								11.518	0.422724	1.28784e-05	0.178696	1.65854e-10	0.821304	0.854959	96.9478	97.8027		11.518	0.378213	6.86504e-05	0.143045	4.71288e-09	0.856955	0.670419	82.5967	83.2671
															11.539	0.468887	0.00178606	0.219855	3.19e-06	0.780142	1.07825	53.8838	54.9621								11.539	0.421826	5.89892e-05	0.177937	3.47972e-09	0.822063	0.850951	83.7336	84.5846		11.539	0.37768	5.95639e-05	0.142642	3.54786e-09	0.857358	0.668377	83.832	84.5003
															11.56	0.467906	0.00174225	0.218936	3.03542e-06	0.781061	1.07313	54.1047	55.1778								11.56	0.420878	2.07064e-05	0.177139	4.28753e-10	0.822861	0.846733	92.8312	93.6779		11.56	0.377054	8.78232e-05	0.14217	7.71292e-09	0.85783	0.665987	80.4618	81.1278
															11.581	0.466969	0.00175	0.21806	3.06248e-06	0.781937	1.06827	54.071	55.1393								11.581	0.420084	4.80561e-05	0.17647	2.30939e-09	0.82353	0.843208	85.5218	86.365		11.581	0.376716	1.56056e-05	0.141915	2.43536e-10	0.858085	0.664698	95.4697	96.1344
															11.602	0.46631	0.00168077	0.217445	2.82498e-06	0.782552	1.06485	54.425	55.4898								11.602	0.419257	5.55371e-05	0.175776	3.08437e-09	0.824224	0.839548	84.2688	85.1083		11.602	0.376125	5.67919e-05	0.14147	3.22532e-09	0.85853	0.662445	84.2518	84.9143
															11.623	0.466132	0.00171282	0.217279	2.93375e-06	0.782718	1.06393	54.2618	55.3258								11.623	0.418711	0.000100833	0.175319	1.01674e-08	0.824681	0.837137	79.0908	79.9279		11.623	0.375631	4.02921e-05	0.141099	1.62345e-09	0.858901	0.660567	87.235	87.8956
															11.644	0.465213	0.00168731	0.216423	2.847e-06	0.783574	1.05918	54.3969	55.4561								11.644	0.417486	9.47229e-05	0.174295	8.97243e-09	0.825705	0.83175	79.6391	80.4709		11.644	0.374739	2.97593e-05	0.140429	8.85614e-10	0.859571	0.657185	89.8704	90.5276
															11.665	0.46431	0.00164097	0.215584	2.69277e-06	0.784414	1.05453	54.6435	55.698								11.665	0.416842	5.49986e-05	0.173757	3.02484e-09	0.826243	0.828924	84.364	85.193		11.665	0.37418	0.000110581	0.14001	1.22281e-08	0.85999	0.655068	78.4713	79.1264
															11.686	0.463236	0.00167737	0.214587	2.81356e-06	0.78541	1.04902	54.4584	55.5074								11.686	0.415956	3.01523e-05	0.173019	9.09161e-10	0.826981	0.825047	89.5885	90.4136		11.686	0.373891	7.22159e-05	0.139794	5.21513e-09	0.860206	0.653977	82.1734	82.8273
															11.707	0.462504	0.00161174	0.21391	2.59769e-06	0.786088	1.04528	54.8088	55.8541								11.707	0.415245	6.76065e-06	0.172428	4.57064e-11	0.827572	0.821944	102.578	103.4		11.707	0.373112	5.09059e-05	0.139212	2.59141e-09	0.860788	0.651039	85.2136	85.8646
															11.728	0.462186	0.0015956	0.213616	2.54594e-06	0.786381	1.04365	54.8979	55.9415								11.728	0.414681	8.96664e-05	0.17196	8.04006e-09	0.82804	0.819487	80.1279	80.9474		11.728	0.372647	5.92492e-05	0.138866	3.51047e-09	0.861134	0.649293	83.8971	84.5464
															11.749	0.461399	0.00155237	0.212889	2.40987e-06	0.787108	1.03964	55.1404	56.1801								11.749	0.41375	4.17154e-05	0.171189	1.74017e-09	0.828811	0.815447	86.7786	87.5941		11.749	0.371887	8.60877e-05	0.1383	7.41109e-09	0.8617	0.646439	80.6547	81.3012
															11.77	0.460571	0.00158657	0.212125	2.5172e-06	0.787872	1.03543	54.9554	55.9908								11.77	0.413039	2.79736e-05	0.170601	7.82521e-10	0.829399	0.812366	90.2527	91.065		11.77	0.371485	4.99081e-05	0.138001	2.49081e-09	0.861999	0.644934	85.3917	86.0366
															11.791	0.460158	0.0015995	0.211745	2.5584e-06	0.788252	1.03333	54.887	55.9203								11.791	0.412752	4.03483e-05	0.170364	1.62798e-09	0.829636	0.811126	87.0724	87.8835		11.791	0.371592	6.05274e-05	0.138081	3.66356e-09	0.861919	0.645335	83.7156	84.361
															11.812	0.459528	0.00157743	0.211166	2.48829e-06	0.788832	1.03014	55.0108	56.041								11.812	0.412004	5.29338e-05	0.169747	2.80199e-09	0.830253	0.807897	84.7174	85.5253		11.812	0.370831	8.74321e-05	0.137516	7.64438e-09	0.862484	0.642487	80.5241	81.1666
															11.833	0.458995	0.0015962	0.210677	2.54785e-06	0.789321	1.02745	54.9108	55.9383								11.833	0.411233	4.65817e-05	0.169113	2.16986e-09	0.830887	0.804578	85.8311	86.6357		11.833	0.370111	0.000121174	0.136982	1.46831e-08	0.863017	0.639804	77.692	78.3318
															11.854	0.457753	0.00150433	0.209538	2.263e-06	0.790459	1.02119	55.432	56.4532								11.854	0.4101	3.04627e-05	0.168182	9.27977e-10	0.831818	0.799716	89.5249	90.3246		11.854	0.36908	0.000103041	0.13622	1.06175e-08	0.86378	0.63597	79.1038	79.7398
															11.875	0.457377	0.00153517	0.209193	2.35674e-06	0.790804	1.0193	55.2576	56.2769								11.875	0.409934	4.91164e-05	0.168046	2.41242e-09	0.831954	0.799008	85.3765	86.1755		11.875	0.36886	2.74982e-05	0.136057	7.56154e-10	0.863943	0.635151	90.5787	91.2139
															11.896	0.456786	0.00152987	0.208653	2.34049e-06	0.791345	1.01633	55.2906	56.3069								11.896	0.409468	5.08929e-06	0.167664	2.59009e-11	0.832336	0.797013	105.07	105.867		11.896	0.368573	0.000104807	0.135846	1.09844e-08	0.864154	0.634088	78.9581	79.5922
															11.917	0.456368	0.0015803	0.208271	2.49735e-06	0.791726	1.01424	55.011	56.0252								11.917	0.408746	2.49181e-06	0.167074	6.20913e-12	0.832926	0.793933	111.276	112.07		11.917	0.367626	4.35374e-05	0.135149	1.89551e-09	0.864851	0.630585	86.5922	87.2227
															11.938	0.455638	0.0015438	0.207606	2.38333e-06	0.792392	1.01059	55.2176	56.2282								11.938	0.407912	3.5048e-05	0.166392	1.22836e-09	0.833608	0.790381	88.3164	89.1067		11.938	0.366932	4.91434e-05	0.134639	2.41507e-09	0.865361	0.628029	85.5427	86.1707
															11.959	0.454458	0.00146478	0.206532	2.14559e-06	0.793466	1.00471	55.6798	56.6845								11.959	0.406813	5.61755e-05	0.165497	3.15569e-09	0.834503	0.785721	84.2233	85.0091		11.959	0.365643	0.000111013	0.133695	1.23239e-08	0.866305	0.62329	78.4692	79.0925
															11.98	0.454232	0.00151211	0.206327	2.28648e-06	0.793671	1.00358	55.4047	56.4083								11.98	0.406664	2.13551e-05	0.165375	4.56039e-10	0.834625	0.785088	92.6249	93.41		11.98	0.365387	9.42133e-05	0.133508	8.87614e-09	0.866492	0.622353	79.8954	80.5178
															12.001	0.453649	0.00151636	0.205798	2.29935e-06	0.7942	1.00069	55.3833	56.384								12.001	0.406081	3.01612e-05	0.164902	9.09696e-10	0.835098	0.782626	89.6284	90.411		12.001	0.364918	5.49782e-05	0.133165	3.0226e-09	0.866835	0.620637	84.5756	85.1962
															12.022	0.453311	0.00156357	0.205491	2.44474e-06	0.794507	0.99901	55.1187	56.1177								12.022	0.405785	2.27275e-05	0.164662	5.16537e-10	0.835338	0.781376	92.0876	92.869		12.022	0.364417	7.8067e-05	0.132799	6.09445e-09	0.867201	0.618805	81.5318	82.1507
															12.043	0.452734	0.00148439	0.204968	2.20341e-06	0.79503	0.996153	55.5729	56.569								12.043	0.40516	7.24244e-06	0.164154	5.2453e-11	0.835846	0.778739	102.024	102.802		12.043	0.36389	5.83892e-05	0.132416	3.4093e-09	0.867584	0.616884	84.0565	84.6733
															12.064	0.451551	0.00145728	0.203899	2.12367e-06	0.796099	0.990317	55.7388	56.7291								12.064	0.404056	1.80441e-05	0.163262	3.2559e-10	0.836738	0.774103	94.0992	94.8733		12.064	0.362628	5.3357e-05	0.131499	2.84697e-09	0.868501	0.612297	84.8439	85.4562
															12.085	0.451268	0.00151324	0.203643	2.28989e-06	0.796355	0.98892	55.4129	56.4019								12.085	0.403922	2.63473e-05	0.163153	6.94182e-10	0.836847	0.773538	90.8117	91.5853		12.085	0.362581	6.82172e-05	0.131465	4.65359e-09	0.868535	0.612127	82.71	83.3221
															12.106	0.450707	0.00151081	0.203137	2.28254e-06	0.796861	0.986164	55.4296	56.4158								12.106	0.403439	3.05958e-05	0.162763	9.36105e-10	0.837237	0.771515	89.5152	90.2868		12.106	0.362266	5.00768e-05	0.131236	2.50769e-09	0.868764	0.610984	85.3963	86.0073
															12.127	0.450371	0.00146776	0.202834	2.15431e-06	0.797163	0.984515	55.6824	56.6669								12.127	0.403015	8.05418e-05	0.162421	6.48698e-09	0.837579	0.769742	81.1098	81.8796		12.127	0.361649	8.53062e-05	0.13079	7.27715e-09	0.86921	0.608754	80.7716	81.3804
															12.148	0.449648	0.00145	0.202184	2.10249e-06	0.797814	0.98097	55.7917	56.7727								12.148	0.40227	2.8305e-05	0.161822	8.01171e-10	0.838178	0.766635	90.1961	90.9627		12.148	0.361031	5.91878e-05	0.130343	3.50319e-09	0.869657	0.606522	83.9488	84.5554
															12.169	0.448674	0.00147468	0.201309	2.17468e-06	0.798689	0.97621	55.6498	56.626								12.169	0.401546	7.19836e-06	0.161239	5.18164e-11	0.838761	0.763619	102.092	102.855		12.169	0.360177	5.00909e-05	0.129727	2.5091e-09	0.870273	0.603446	85.4014	86.0048
															12.19	0.448645	0.00148109	0.201283	2.19363e-06	0.798715	0.976069	55.6123	56.5884								12.19	0.401545	4.35757e-05	0.161238	1.89884e-09	0.838762	0.763614	86.4515	87.2151		12.19	0.360243	0.000149608	0.129775	2.23824e-08	0.870225	0.603683	75.8972	76.5009
															12.211	0.448193	0.00148206	0.200877	2.19651e-06	0.799121	0.973861	55.6088	56.5827								12.211	0.401085	7.90623e-05	0.16087	6.25085e-09	0.83913	0.761705	81.2789	82.0406		12.211	0.360001	9.14902e-05	0.1296	8.37045e-09	0.8704	0.602814	80.1697	80.7725
															12.232	0.447825	0.00148102	0.200547	2.19341e-06	0.799451	0.972072	55.6167	56.5888								12.232	0.400577	2.50068e-05	0.160462	6.25342e-10	0.839538	0.759595	91.2792	92.0388		12.232	0.3593	9.42244e-05	0.129097	8.87824e-09	0.870903	0.600301	79.9164	80.5167
															12.253	0.44677	0.00142204	0.199604	2.02221e-06	0.800394	0.96695	55.9748	56.9417								12.253	0.399667	2.58981e-05	0.159734	6.70711e-10	0.840266	0.755832	90.9788	91.7346		12.253	0.358431	6.00273e-05	0.128473	3.60327e-09	0.871527	0.59719	83.8358	84.433
															12.274	0.445905	0.0014944	0.198831	2.23324e-06	0.801167	0.962758	55.5479	56.5106								12.274	0.398925	9.68566e-05	0.159141	9.38119e-09	0.840859	0.752767	79.5247	80.2774		12.274	0.357538	5.60588e-05	0.127833	3.14259e-09	0.872167	0.594004	84.4331	85.0271
															12.295	0.445747	0.00144804	0.19869	2.09682e-06	0.801308	0.961994	55.8224	56.7844								12.295	0.398922	5.32509e-05	0.159139	2.83566e-09	0.840861	0.752759	84.7207	85.4735		12.295	0.357491	5.92582e-05	0.1278	3.51153e-09	0.8722	0.593839	83.9512	84.545
															12.316	0.445675	0.00134674	0.198626	1.81372e-06	0.801372	0.961649	56.4527	57.4143								12.316	0.398755	3.50892e-05	0.159005	1.23125e-09	0.840995	0.752068	88.3445	89.0965		12.316	0.357368	6.76267e-05	0.127712	4.57337e-09	0.872288	0.593401	82.8042	83.3976
															12.337	0.445123	0.00145742	0.198134	2.12409e-06	0.801864	0.958983	55.7693	56.7283								12.337	0.398162	2.47612e-05	0.158533	6.13118e-10	0.841467	0.74963	91.3749	92.1246		12.337	0.356462	0.000103958	0.127065	1.08074e-08	0.872935	0.59018	79.0726	79.6628
															12.358	0.443866	0.00144554	0.197017	2.08959e-06	0.802981	0.952936	55.8465	56.7994								12.358	0.397124	2.37364e-05	0.157708	5.63417e-10	0.842292	0.745371	91.7463	92.4917		12.358	0.355437	7.07057e-05	0.126335	4.9993e-09	0.873665	0.586552	82.4244	83.0109
															12.379	0.442714	0.0014431	0.195996	2.08254e-06	0.804002	0.947418	55.8666	56.8141								12.379	0.39622	4.60462e-05	0.15699	2.12025e-09	0.84301	0.741673	85.9945	86.7361		12.379	0.354346	7.60843e-05	0.125561	5.78881e-09	0.874439	0.582705	81.7914	82.3741
															12.4	0.442403	0.00148163	0.195721	2.19523e-06	0.804277	0.94593	55.6393	56.5852								12.4	0.395987	1.83585e-05	0.156805	3.37036e-10	0.843195	0.740722	93.9825	94.7232		12.4	0.354033	0.000138609	0.12534	1.92124e-08	0.87466	0.581606	76.5826	77.1642
[truncated: 50 more columns]

## Sheet: Figure 4
	MXene	A	SER	EMI SE (dB)	A	Graphene	A	SER	EMI SE (dB)	A	CNT	A	SER	EMI SE (dB)	A	Metal-based	A	SER	EMI SE (dB)	A	Metal Substrates	A	SER	EMI SE (dB)	A	This Work	A	SER	EMI SE (dB)	A
			(dB)					(dB)					(dB)					(dB)			This Work		(dB)					(dB)
		0.01	20	82	0.01		0.11	9	56	0.11		0.11	9	50.5	0.11		0.03	15	70	0.03		0.06	12.21	43.85	0.06		0.71	1.46	53.07	0.71
		0.02	17.5	57.4	0.02		0.006	22	80	0.006		0.32	5	44	0.32		0.16	8	55	0.16		0.07	11.95	35.98	0.07		0.75	1.2	89.32	0.75
		0.02	17	49.7	0.02		0.26	5.9	31.2	0.26		0.35	4.5	35	0.35		0.09	11	70.1	0.09		0.01	17.23	46	0.01		0.79	0.99	85.52	0.79
		0.04	13.5	46.1	0.04		0.51	2.99	26	0.51		0.4	4	30	0.4		0.04	14.5	61.8	0.04		0.04	13.92	41.33	0.04		0.71	1.46	86.93	0.71
		0.01	27	68	0.01		0.1	10	42.3	0.1		0.23	6.3	22.5	0.23		0.01	20	109.3	0.01		0.11	9.67	30.39	0.11		0.73	1.36	84.76	0.73
		0.02	19.2	53.6	0.02		0.16	8	24	0.16		0.2	7.2	46.7	0.2		0.02	17	70.5	0.02		0.06	12.15	38.08	0.06		0.7	1.54	84.09	0.7
		0.1	10.3	55.9	0.1		0.52	2.86	43.7	0.52		0.16	8	54.4	0.16		0.04	14	105	0.04							0.81	0.87	58.85	0.81
		0.02	18	48	0.02		0.39	4.11	31.28	0.39		0.04	14	36	0.04		0.001	29.55	63.5	0.001							0.76	1.15	73.98	0.76
		0.29	5.3	25.8	0.29		0.31	5	27.8	0.31		0.25	6	30	0.25		0.1	10	100	0.1
		0.01	17	37.3	0.01		0.16	7.96	21.72	0.16
		0.02	17.7	39.6	0.02		0.22	6.67	36	0.22
		0.63	2	28	0.63		0.73	1.46	36	0.73
		0.09	11	21	0.09		0.4	4	29.3	0.4
		0.15	8.3	44.4	0.15		0.16	8.1	35	0.16
		0.22	6.5	61.2	0.22		0.06	12	70.2	0.06
		0.01	19.13	70.08	0.01
		0.11	9.23	60.98	0.11
		0.005	23	85	0.005
		0.02	19	52	0.02
		0.17	7.7	61	0.17
		0.3	5.2	33.3	0.3
		0.5	3	28	0.5
		0.42	3.7	51.7	0.42
		0.27	5.7	56.4	0.27
		0.03	15	45.7	0.03
		0.26	5.7	26.5	0.26
		0.03	16	58.4	0.03
		0.03	15	40.1	0.03

## Sheet: Figure S1
(a)	399.193	0	(b)	5.0001	1363.58	(c)	50	202.856
FTIR	400.157	0	XRD	5.0201	1296.2	Raman	50.5	214.472
	401.121	0		5.0401	1306.53		51	227.156
	402.085	0		5.0601	1399.28		51.5	226.854
	403.05	0		5.0801	1462.69		52	217.762
	404.014	0		5.1001	1525.07		52.5	214.808
	404.978	0		5.1201	1504.28		53	215.408
	405.942	0		5.1401	1497.53		53.5	209.982
	406.906	0		5.1601	1549.51		54	205.852
	407.871	0		5.1801	1528.82		54.5	214.054
	408.835	0		5.2001	1453.75		55	229.237
	409.799	0		5.2201	1409.96		55.5	242.572
	410.764	0		5.2401	1361.46		56	251.715
	411.728	0		5.2601	1339.99		56.5	257.022
	412.692	0		5.2801	1302.29		57	262.245
	413.656	0		5.3001	1315.84		57.5	272.14
	414.62	0		5.3201	1271.6		58	292.23
	415.585	0		5.3401	1283.77		58.5	321.568
	416.549	0		5.3601	1305.11		59	348.1
	417.513	0		5.3801	1286.83		59.5	370.003
	418.477	0		5.4001	1251.45		60	400.374
	419.442	0		5.4201	1285.25		60.5	440.248
	420.406	0		5.4401	1296.61		61	477.153
	421.37	0		5.4601	1351.75		61.5	503.829
	422.334	0		5.4801	1318.83		62	518.441
	423.298	0		5.5001	1302.99		62.5	526.138
	424.263	0		5.5201	1300.56		63	535.898
	425.227	0		5.5401	1309.63		63.5	552.027
	426.191	0		5.5601	1280.85		64	574.648
	427.155	0		5.5801	1289.23		64.5	592.572
	428.12	0		5.6001	1309.66		65	594.548
	429.084	0		5.6201	1300.04		65.5	588.731
	430.048	0		5.6401	1333.31		66	586.808
	431.012	0		5.6601	1325.09		66.5	593.654
	431.977	0		5.6801	1298.85		67	607.626
	432.941	0		5.7001	1275.37		67.5	613.949
	433.905	0		5.7201	1295.78		68	603.925
	434.869	0		5.7401	1284.65		68.5	585.356
	435.834	0		5.7601	1223.01		69	570.234
	436.798	0		5.7801	1328.93		69.5	573.373
	437.762	0		5.8001	1314.43		70	591.84
	438.726	0		5.8201	1304.88		70.5	602.273
	439.69	0		5.8401	1280.06		71	596.201
	440.655	0		5.8601	1303.85		71.5	580.551
	441.619	0		5.8801	1233.03		72	570.249
	442.583	0		5.9001	1217.65		72.5	582.33
	443.547	0		5.9201	1290.37		73	604.268
	444.512	0		5.9401	1295.36		73.5	611.267
	445.476	0		5.9601	1262.63		74	604.72
	446.44	0		5.9801	1205.61		74.5	596.203
	447.404	0		6.0001	1260.54		75	593.032
	448.369	0		6.0201	1262.21		75.5	598.464
	449.333	0		6.0401	1265.02		76	605.688
	450.297	0		6.0601	1251.74		76.5	605.444
	451.261	0		6.0801	1320.28		77	588.286
	452.226	0		6.1001	1340.26		77.5	559.095
	453.19	0		6.1201	1305.76		78	552.399
	454.154	0		6.1401	1263.97		78.5	575.471
	455.118	0		6.1601	1329.04		79	586.801
	456.082	0		6.1801	1293.76		79.5	575.769
	457.047	0		6.2001	1274.12		80	573.674
	458.011	0		6.2201	1240.1		80.5	583.999
	458.975	0		6.2401	1251.27		81	583.765
	459.939	0		6.2601	1273.96		81.5	579.229
	460.904	0		6.2801	1251.14		82	594.526
	461.868	0		6.3001	1287.78		82.5	613.991
	462.832	0		6.3201	1264.25		83	606.74
	463.796	0		6.3401	1277.78		83.5	590.511
	464.76	0		6.3601	1269.36		84	594.504
	465.725	0		6.3801	1277.54		84.5	603.034
	466.689	0		6.4001	1304.58		85	595.23
	467.653	0		6.4201	1281.02		85.5	582.803
	468.617	0		6.4401	1298.28		86	578.124
	469.582	0		6.4601	1281.89		86.5	574.906
	470.546	0		6.4801	1331.52		87	570.147
	471.51	0		6.5001	1312.61		87.5	573.751
	472.474	0		6.5201	1287.85		88	587.249
	473.439	0		6.5401	1313.55		88.5	597.041
	474.403	0		6.5601	1316.94		89	599.188
	475.367	0		6.5801	1314.34		89.5	602.067
	476.331	0		6.6001	1361.79		90	605.358
	477.296	0		6.6201	1347.64		90.5	601.095
	478.26	0		6.6401	1265.45		91	590.679
	479.224	0		6.6601	1374.97		91.5	581.519
	480.188	0		6.6801	1328.03		92	576.397
	481.152	0		6.7001	1322.94		92.5	574.915
	482.117	0		6.7201	1310.22		93	572.22
	483.081	0		6.7401	1315.12		93.5	564.986
	484.045	0		6.7601	1371.7		94	564.452
	485.009	0		6.7801	1343.2		94.5	578.078
	485.974	0		6.8001	1337.02		95	587.224
	486.938	0		6.8201	1372.39		95.5	580.608
	487.902	0		6.8401	1315.58		96	577.966
	488.866	0		6.8601	1354.37		96.5	586.444
	489.831	0		6.8801	1333.28		97	582.659
	490.795	0		6.9001	1344.57		97.5	565.023
	491.759	0		6.9201	1348.52		98	564.554
	492.723	0		6.9401	1352.77		98.5	578.913
	493.688	0		6.9601	1329.91		99	571.343
	494.652	0		6.9801	1340.5		99.5	547.423
	495.616	0		7.0001	1331.62		100	543.335
	496.58	0		7.0201	1271.43		100.5	555.924
	497.544	0		7.0401	1364.3		101	561.863
	498.509	0		7.0601	1366.9		101.5	563.581
	499.473	0		7.0801	1379.98		102	571.146
	500.437	0		7.1001	1389.34		102.5	574.924
	501.401	0		7.1201	1353.13		103	565.123
	502.366	0		7.1401	1333.64		103.5	555.384
	503.33	0		7.1601	1395.55		104	556.367
	504.294	0		7.1801	1389.32		104.5	555.998
	505.258	0		7.2001	1319.8		105	548.603
	506.223	0		7.2201	1396.38		105.5	548.94
	507.187	0		7.2401	1408.16		106	559.257
	508.151	0		7.2601	1421.41		106.5	560.246
	509.115	0		7.2801	1407.02		107	555.27
	510.079	0		7.3001	1433.73		107.5	572.957
	511.044	0		7.3201	1439.98		108	601.862
	512.008	0		7.3401	1414.75		108.5	600.063
	512.972	0		7.3601	1416.38		109	575.465
	513.936	0		7.3801	1394.27		109.5	564.03
	514.901	0		7.4001	1450.53		110	568.205
	515.865	0		7.4201	1433.96		110.5	574.913
	516.829	0		7.4401	1412.88		111	573.97
	517.793	0		7.4601	1412.52		111.5	562.647
	518.758	0		7.4801	1437.66		112	563.628
	519.722	0		7.5001	1419.79		112.5	587.592
	520.686	0		7.5201	1376.04		113	593.156
	521.65	0		7.5401	1363.88		113.5	561.606
	522.615	0		7.5601	1413.43		114	539.853
	523.579	0		7.5801	1438.71		114.5	550.609
	524.543	0		7.6001	1481.58		115	567.676
	525.507	0		7.6201	1467.51		115.5	574.503
	526.471	0		7.6401	1456.12		116	570.867
	527.436	0		7.6601	1470.32		116.5	567.651
	528.4	0		7.6801	1489.11		117	581.826
	529.364	0		7.7001	1422.08		117.5	599.822
	530.328	0		7.7201	1482.21		118	593.155
	531.293	0		7.7401	1492.4		118.5	569.48
	532.257	0		7.7601	1497.59		119	551.709
	533.221	0		7.7801	1543.1		119.5	553.111
	534.185	0		7.8001	1511.49		120	575.647
	535.149	0		7.8201	1552.05		120.5	590.131
	536.114	0		7.8401	1558.38		121	576.713
	537.078	0		7.8601	1597.87		121.5	562.225
	538.042	0		7.8801	1539.23		122	563.252
	539.006	0		7.9001	1538.44		122.5	560.125
	539.971	0		7.9201	1542.91		123	549.825
	540.935	0		7.9401	1546.95		123.5	559.381
	541.899	0		7.9601	1471.81		124	583.183
	542.863	0		7.9801	1557.26		124.5	580.277
	543.828	0		8.0001	1555.38		125	553.676
	544.792	0		8.0201	1520.7		125.5	540.004
	545.756	0		8.0401	1596.07		126	541.524
	546.72	0		8.0601	1606.97		126.5	542.18
	547.685	0		8.0801	1569.5		127	544.47
	548.649	0		8.1001	1678.47		127.5	555
	549.613	0		8.1201	1603.1		128	559.801
	550.577	0		8.1401	1676.44		128.5	547.619
	551.542	0		8.1601	1646.59		129	538.971
	552.506	0		8.1801	1638.66		129.5	549.638
	553.47	0		8.2001	1670.4		130	566.06
	554.434	0		8.2201	1783.42		130.5	575.952
	555.398	0		8.2401	1727.6		131	577.74
	556.363	0		8.2601	1715.22		131.5	573.951
	557.327	0		8.2801	1636.01		132	570.774
	558.291	0		8.3001	1645.12		132.5	569.123
	559.255	0		8.3201	1652.87		133	565.039
	560.22	0		8.3401	1717.09		133.5	561.094
	561.184	0		8.3601	1674.63		134	563.256
	562.148	0		8.3801	1712.7		134.5	564.628
	563.112	0		8.4001	1794.56		135	555.11
	564.077	0		8.4201	1770.28		135.5	546.035
	565.041	0		8.4401	1747.92		136	551.019
	566.005	0		8.4601	1782.46		136.5	559.517
	566.969	0		8.4801	1797.29		137	560.69
	567.933	0		8.5001	1804.14		137.5	561.721
	568.898	0		8.5201	1764.79		138	566.006
	569.862	0		8.5401	1700.04		138.5	562.023
	570.826	0		8.5601	1819.07		139	550.158
	571.79	0		8.5801	1796.27		139.5	551.252
	572.755	0		8.6001	1837.24		140	563.963
	573.719	0		8.6201	1922.42		140.5	561.895
	574.683	0		8.6401	1931.18		141	551.534
	575.647	0		8.6601	1943.74		141.5	563.258
	576.612	0		8.6801	1906.72		142	582.119
	577.576	0		8.7001	1954.95		142.5	573.339
	578.54	0		8.7201	2000.66		143	555.499
	579.504	0		8.7401	2001.59		143.5	560.283
	580.468	0		8.7601	1967.6		144	572.383
	581.433	0		8.7801	1999.31		144.5	570.14
	582.397	0		8.8001	2036.49		145	558.766
	583.361	0		8.8201	1954.82		145.5	548.33
	584.325	0		8.8401	1963.57		146	546.96
	585.29	0		8.8601	2054.85		146.5	554.923
	586.254	0		8.8801	2078.13		147	560.014
	587.218	0		8.9001	2032.66		147.5	557.323
	588.182	0		8.9201	2113.21		148	552.377
	589.147	0		8.9401	2119.72		148.5	549.253
	590.111	0		8.9601	2099.47		149	550.028
	591.075	0		8.9801	2080.27		149.5	555.328
	592.039	0		9.0001	2197.77		150	564.012
	593.004	0		9.0201	2192.22		150.5	568.205
	593.968	0		9.0401	2226.13		151	560.718
	594.932	0		9.0601	2169.79		151.5	553.981
	595.896	0		9.0801	2245.52		152	559.612
	596.861	0		9.1001	2223.15		152.5	563.791
	597.825	0		9.1201	2329.95		153	558.048
	598.789	0		9.1401	2263.32		153.5	560.88
	599.753	91.9709		9.1601	2362.64		154	576.033
	600.717	91.969		9.1801	2341.36		154.5	574.762
	601.682	91.9756		9.2001	2425.33		155	554.823
	602.646	91.9919		9.2201	2427.33		155.5	550.165
	603.61	92.0155		9.2401	2449.67		156	565.488
	604.574	92.0431		9.2601	2456.99		156.5	577.816
	605.539	92.0716		9.2801	2576.54		157	577.685
	606.503	92.1001		9.3001	2569.15		157.5	566.448
	607.467	92.1288		9.3201	2504.01		158	555.434
	608.431	92.1585		9.3401	2561.67		158.5	556.272
	609.395	92.189		9.3601	2569.27		159	557.863
	610.36	92.2194		9.3801	2615.65		159.5	548.444
	611.324	92.2478		9.4001	2688		160	540.573
	612.288	92.2735		9.4201	2750.73		160.5	545.063
	613.252	92.2977		9.4401	2700.61		161	554.716
	614.217	92.3229		9.4601	2798.73		161.5	562.363
	615.181	92.3535		9.4801	2832.17		162	565.815
	616.145	92.3928		9.5001	2901.06		162.5	564.694
	617.109	92.442		9.5201	2889.37		163	560.381
	618.074	92.4996		9.5401	3017.1		163.5	556.364
	619.038	92.5617		9.5601	2935.93		164	557.168
	620.002	92.6246		9.5801	2937.23		164.5	558.553
	620.966	92.6848		9.6001	3056.39		165	553.079
	621.931	92.7411		9.6201	3112.33		165.5	552.311
	622.895	92.7935		9.6401	3104.08		166	569.422
	623.859	92.8425		9.6601	3250.36		166.5	582.012
	624.823	92.888		9.6801	3272.4		167	569.954
	625.788	92.929		9.7001	3351.96		167.5	558.54
	626.752	92.9644		9.7201	3329.99		168	566.453
	627.716	92.9943		9.7401	3334.59		168.5	573.758
	628.68	93.0208		9.7601	3415.75		169	569.876
	629.644	93.0486		9.7801	3485.21		169.5	568.692
	630.609	93.0826		9.8001	3553.76		170	572.846
	631.573	93.1275		9.8201	3694.38		170.5	569.843
	632.537	93.1856		9.8401	3713.75		171	560.888
	633.501	93.2555		9.8601	3771.96		171.5	557.722
	634.466	93.3332		9.8801	3933.38		172	555.437
	635.43	93.4135		9.9001	3993.26		172.5	542.98
	636.394	93.4917		9.9201	4030.2		173	536.706
	637.358	93.5647		9.9401	4048.5		173.5	553.6
	638.322	93.6309		9.9601	4172.24		174	561.117
	639.287	93.6888		9.9801	4180.63		174.5	532.935
	640.251	93.7363		10.0001	4221.58		175	505.562
	641.215	93.7701		10.0201	4458.75		175.5	509.454
	642.179	93.7866		10.0401	4522.97		176	535.996
	643.144	93.783		10.0601	4521.76		176.5	564.562
	644.108	93.76		10.0801	4687.72		177	565.657
	645.072	93.7216		10.1001	4863.25		177.5	545.299
	646.036	93.675		10.1201	4820.09		178	544.86
	647.001	93.6287		10.1401	5008.38		178.5	565.814
	647.965	93.5901		10.1601	5042.4		179	580.836
	648.929	93.5648		10.1801	5203.52		179.5	584.127
	649.893	93.5553		10.2001	5293.07		180	580.885
	650.857	93.5619		10.2201	5413.52		180.5	572.88
	651.822	93.5835		10.2401	5578.35		181	561.552
	652.786	93.6187		10.2601	5806.04		181.5	551.983
	653.75	93.6651		10.2801	6141.4		182	549.457
	654.715	93.7197		10.3001	6269.21		182.5	557.373
	655.679	93.7784		10.3201	6358.21		183	570.943
	656.643	93.8351		10.3401	6452.82		183.5	571.635
	657.607	93.8839		10.3601	6884.82		184	556.831
	658.571	93.9204		10.3801	7040.55		184.5	545.221
	659.536	93.9431		10.4001	7208.8		185	547.712
	660.5	93.9546		10.4201	7564.11		185.5	564.999
	661.464	93.9608		10.4401	7862.82		186	575.609
	662.428	93.9685		10.4601	8251.69		186.5	552.226
	663.393	93.9843		10.4801	8614.51		187	523.623
	664.357	94.0121		10.5001	8935.8		187.5	528.824
	665.321	94.0523		10.5201	9340.6		188	541.188
	666.285	94.1007		10.5401	9699.57		188.5	531.564
	667.25	94.1484		10.5601	10107		189	522.789
	668.214	94.1837		10.5801	10818.9		189.5	533.136
	669.178	94.1978		10.6001	11218.2		190	549.446
	670.142	94.1888		10.6201	12008.8		190.5	559.647
	671.106	94.1624		10.6401	12588		191	559.536
	672.071	94.1279		10.6601	13519.4		191.5	553.378
	673.035	94.0968		10.6801	14393.7		192	552.445
	673.999	94.0788		10.7001	15217.1		192.5	554.441
	674.963	94.0815		10.7201	16151		193	549.359
	675.928	94.1098		10.7401	16971.5		193.5	546.435
	676.892	94.1639		10.7601	18062.8		194	559.344
	677.856	94.2384		10.7801	19251.9		194.5	573.204
	678.82	94.3223		10.8001	20445.5		195	570.12
	679.784	94.402		10.8201	21602.7		195.5	556.481
	680.749	94.4648		10.8401	23010.5		196	544.514
	681.713	94.5012		10.8601	24242.2		196.5	547.02
	682.677	94.5086		10.8801	25252.6		197	563.666
	683.641	94.49		10.9001	26427.9		197.5	572.897
	684.606	94.4534		10.9201	27782.6		198	565.405
	685.57	94.409		10.9401	28217.7		198.5	548.588
	686.534	94.3671		10.9601	29277.5		199	537.391
	687.498	94.3363		10.9801	29777.7		199.5	548.549
	688.463	94.3217		11.0001	30167.5		200	565.257
	689.427	94.3253		11.0201	30173.3		200.5	559.518
	690.391	94.3461		11.0401	29865.4		201	547.987
	691.355	94.3809		11.0601	29377.6		201.5	555.178
	692.32	94.4241		11.0801	28673.6		202	571.068
	693.284	94.4693		11.1001	27932.6		202.5	579.395
	694.248	94.5098		11.1201	26715.9		203	570.132
	695.212	94.5404		11.1401	25835.1		203.5	548.791
	696.177	94.5584		11.1601	24269.2		204	545.718
	697.141	94.5645		11.1801	23000.9		204.5	565.201
	698.105	94.5631		11.2001	21665.3		205	577.699
	699.069	94.5595		11.2201	20261		205.5	574.464
	700.033	94.5592		11.2401	18815.9		206	565.522
	700.998	94.5651		11.2601	17654.5		206.5	556.308
	701.962	94.5767		11.2801	16279.5		207	548.875
	702.926	94.5905		11.3001	15317.3		207.5	543.063
	703.89	94.6017		11.3201	14047.4		208	539.493
	704.855	94.6066		11.3401	13078.9		208.5	545.599
	705.819	94.604		11.3601	12296.3		209	563.014
	706.783	94.5964		11.3801	11546.7		209.5	572.576
	707.747	94.5883		11.4001	10971.1		210	562.597
	708.712	94.5851		11.4201	10163.6		210.5	541.868
	709.676	94.5903		11.4401	9583.37		211	525.961
	710.64	94.6043		11.4601	9054.42		211.5	534.61
	711.604	94.6243		11.4801	8460.7		212	559.322
	712.568	94.6459		11.5001	7973.44		212.5	569.711
	713.533	94.665		11.5201	7667.29		213	564.983
	714.497	94.6788		11.5401	7262.59		213.5	560.695
	715.461	94.6874		11.5601	6988.61		214	560.962
	716.425	94.693		11.5801	6572.71		214.5	564.389
	717.39	94.6991		11.6001	6158.02		215	565.876
	718.354	94.709		11.6201	6020.58		215.5	564.489
	719.318	94.7246		11.6401	5677.52		216	573.153
	720.282	94.7459		11.6601	5597.69		216.5	592.015
	721.247	94.7714		11.6801	5371.05		217	594.424
	722.211	94.7981		11.7001	5184.55		217.5	579.353
	723.175	94.8228		11.7201	4968.68		218	579.29
	724.139	94.8433		11.7401	4830.98		218.5	590.116
	725.104	94.8582		11.7601	4536.04		219	579.123
	726.068	94.8684		11.7801	4468.15		219.5	557.753
	727.032	94.8762		11.8001	4309.51		220	557.677
	727.996	94.8863		11.8201	4196.34		220.5	571.945
	728.96	94.9039		11.8401	4191.88		221	581.263
	729.925	94.9339		11.8601	4016.18		221.5	577.439
	730.889	94.9794		11.8801	3839.5		222	561.639
	731.853	95.04		11.9001	3784.67		222.5	551.993
	732.817	95.1115		11.9201	3710.43		223	557.824
	733.782	95.1862		11.9401	3581.86		223.5	568.349
	734.746	95.2549		11.9601	3539.44		224	573.321
	735.71	95.3089		11.9801	3334.55		224.5	566.422
	736.674	95.3419		12.0001	3321.83		225	555.892
	737.639	95.3514		12.0201	3234.11		225.5	559.033
	738.603	95.3398		12.0401	3210.4		226	568.435
	739.567	95.3128		12.0601	3120.6		226.5	567.394
	740.531	95.2785		12.0801	3076.98		227	565.071
	741.495	95.2459		12.1001	2991.56		227.5	573.828
	742.46	95.223		12.1201	2952.89		228	582.895
	743.424	95.2154		12.1401	2855.11		228.5	582.858
	744.388	95.2264		12.1601	2943.21		229	580.527
	745.352	95.2557		12.1801	2772.13		229.5	578.919
	746.317	95.3002		12.2001	2734.99		230	571.432
	747.281	95.3542		12.2201	2635.5		230.5	562.345
	748.245	95.4103		12.2401	2641.22		231	567.139
	749.209	95.4617		12.2601	2618.79		231.5	579.47
	750.174	95.5031		12.2801	2617.05		232	579.034
	751.138	95.5323		12.3001	2545.81		232.5	566.363
	752.102	95.5504		12.3201	2501.19		233	553.403
	753.066	95.5611		12.3401	2453.73		233.5	557.134
	754.03	95.5695		12.3601	2392.55		234	582.105
	754.995	95.5799		12.3801	2398.58		234.5	586.942
	755.959	95.5953		12.4001	2314.47		235	554.418
	756.923	95.6165		12.4201	2365.53		235.5	539.116
	757.888	95.6428		12.4401	2316.68		236	561.659
	758.852	95.6726		12.4601	2279.38		236.5	581.162
	759.816	95.7048		12.4801	2202.72		237	580.749
	760.78	95.7383		12.5001	2142.02		237.5	571.21
	761.744	95.7724		12.5201	2147.23		238	559.945
	762.709	95.8054		12.5401	2092.91		238.5	551.958
	763.673	95.8349		12.5601	2126.18		239	556.421
	764.637	95.8579		12.5801	2075.12		239.5	577.219
	765.601	95.8716		12.6001	2001.28		240	586.283
	766.566	95.8749		12.6201	2022.14		240.5	565.142
	767.53	95.8689		12.6401	1981.1		241	548.182
	768.494	95.8573		12.6601	1978.81		241.5	553.63
	769.458	95.8456		12.6801	1884.54		242	553.417
	770.423	95.8385		12.7001	1948.32		242.5	542.624
	771.387	95.8396		12.7201	1897.24		243	548.976
	772.351	95.8495		12.7401	1928.15		243.5	569.108
	773.315	95.8665		12.7601	1880.09		244	574.975
	774.279	95.8872		12.7801	1919.24		244.5	565.898
	775.244	95.908		12.8001	1872.07		245	556.16
	776.208	95.9267		12.8201	1772.11		245.5	556.241
	777.172	95.9425		12.8401	1826.66		246	569.642
	778.136	95.956		12.8601	1697.64		246.5	579.642
	779.101	95.9685		12.8801	1688.78		247	575.87
	780.065	95.9815		12.9001	1735.75		247.5	573.355
	781.029	95.9962		12.9201	1741.65		248	579.187
	781.993	96.0132		12.9401	1696.75		248.5	582.966
	782.957	96.0329		12.9601	1735.85		249	581.095
	783.922	96.056		12.9801	1707.82		249.5	577.828
	784.886	96.0825		13.0001	1675.97		250	569.846
	785.85	96.1127		13.0201	1624.56		250.5	551.59
	786.814	96.1457		13.0401	1629.4		251	539.943
	787.779	96.1802		13.0601	1603.71		251.5	553.681
	788.743	96.2146		13.0801	1563.74		252	574.886
	789.707	96.2474		13.1001	1576.35		252.5	581.146
	790.671	96.2777		13.1201	1582.32		253	567.191
	791.636	96.3054		13.1401	1556.85		253.5	543.023
	792.6	96.3313		13.1601	1527.29		254	540.15
	793.564	96.356		13.1801	1503.08		254.5	557.283
	794.528	96.3796		13.2001	1529.1		255	553.58
	795.493	96.4016		13.2201	1514.73		255.5	537.219
	796.457	96.421		13.2401	1512.43		256	551.425
	797.421	96.4365		13.2601	1553.32		256.5	580.917
	798.385	96.4478		13.2801	1471.06		257	586.764
	799.35	96.4553		13.3001	1408.56		257.5	574.242
	800.314	96.4601		13.3201	1438		258	559.82
	801.278	96.4632		13.3401	1493.95		258.5	546.198
	802.242	96.4653		13.3601	1423.77		259	538.179
	803.206	96.4661		13.3801	1371.1		259.5	551.079
	804.171	96.4651		13.4001	1400.79		260	579.872
	805.135	96.4624		13.4201	1347.04		260.5	590.59
	806.099	96.4587		13.4401	1371.66		261	579.657
	807.063	96.4566		13.4601	1395.28		261.5	572.181
	808.028	96.459		13.4801	1362.39		262	572.01
	808.992	96.4681		13.5001	1372.55		262.5	570.743
	809.956	96.4846		13.5201	1373.77		263	570
	810.92	96.5068		13.5401	1351.27		263.5	574.815
	811.885	96.5313		13.5601	1278.98		264	587.659
	812.849	96.5537		13.5801	1311.93		264.5	603.282
	813.813	96.5704		13.6001	1258.98		265	599.105
	814.777	96.5799		13.6201	1280.18		265.5	572.225
	815.741	96.5829		13.6401	1274.86		266	554.36
	816.706	96.5819		13.6601	1239.14		266.5	556.727
	817.67	96.5804		13.6801	1255.51		267	566.305
	818.634	96.5816		13.7001	1249.8		267.5	574.125
	819.598	96.5878		13.7201	1214.94		268	575.531
	820.563	96.5996		13.7401	1214.54		268.5	571.241
	821.527	96.6167		13.7601	1198.33		269	564.683
	822.491	96.6377		13.7801	1208.47		269.5	560.844
	823.455	96.6609		13.8001	1203.4		270	562.35
	824.419	96.6837		13.8201	1150.15		270.5	564.26
	825.384	96.7038		13.8401	1227.46		271	566.239
	826.348	96.7186		13.8601	1198.79		271.5	577.695
	827.312	96.7269		13.8801	1165.39		272	588.809
	828.276	96.7286		13.9001	1139.05		272.5	569.834
	829.241	96.7257		13.9201	1200.29		273	539.023
	830.205	96.7221		13.9401	1143.6		273.5	543.72
	831.169	96.7222		13.9601	1128.09		274	570.498
	832.133	96.73		13.9801	1149.13		274.5	582.695
	833.098	96.7472		14.0001	1079.23		275	576.817
	834.062	96.7726		14.0201	1150.9		275.5	561.17
	835.026	96.8023		14.0401	1138.08		276	548.858
	835.99	96.831		14.0601	1084.96		276.5	549.063
	836.955	96.8542		14.0801	1136.11		277	561.668
	837.919	96.8691		14.1001	1090.16		277.5	577.703
	838.883	96.8764		14.1201	1114.57		278	579.707
	839.847	96.8789		14.1401	1126.83		278.5	567.55
	840.812	96.8812		14.1601	1040.47		279	555.123
	841.776	96.8869		14.1801	1085.68		279.5	554.202
	842.74	96.8977		14.2001	1041.7		280	570.191
	843.704	96.9128		14.2201	1098.97		280.5	582.108
	844.668	96.9297		14.2401	1073.47		281	572.867
	845.633	96.945		14.2601	1084.04		281.5	564.61
	846.597	96.956		14.2801	1047.86		282	572.389
	847.561	96.9613		14.3001	1059.53		282.5	582.191
	848.525	96.9612		14.3201	1065.01		283	580.428
	849.49	96.9572		14.3401	1029.94		283.5	559.925
	850.454	96.951		14.3601	1044.11		284	540.049
	851.418	96.9441		14.3801	979.226		284.5	554.946
	852.382	96.9374		14.4001	993.659		285	578.437
	853.346	96.9311		14.4201	998.435		285.5	566.931
	854.311	96.9249		14.4401	1021.21		286	554.335
	855.275	96.9189		14.4601	1018.86		286.5	575.576
	856.239	96.9128		14.4801	967.631		287	586.721
	857.203	96.907		14.5001	946.328		287.5	564.686
	858.168	96.902		14.5201	990.546		288	558.641
	859.132	96.8984		14.5401	977.655		288.5	578.691
	860.096	96.897		14.5601	933.458		289	577.597
	861.06	96.8983		14.5801	965.579		289.5	557.013
	862.025	96.9026		14.6001	955.374		290	556.996
	862.989	96.9093		14.6201	986.807		290.5	573.633
	863.953	96.9173		14.6401	958.602		291	582.208
	864.917	96.925		14.6601	998.118		291.5	573.623
	865.881	96.9304		14.6801	1018.13		292	552.45
	866.846	96.9323		14.7001	986.69		292.5	549.982
	867.81	96.9308		14.7201	984.561		293	575.483
	868.774	96.9271		14.7401	937.479		293.5	585.671
	869.739	96.9237		14.7601	929.461		294	571.055
	870.703	96.9237		14.7801	973.281		294.5	569.189
	871.667	96.9295		14.8001	937.82		295	579.465
	872.631	96.9427		14.8201	883.537		295.5	572.635
	873.595	96.963		14.8401	903.815		296	558.509
	874.56	96.989		14.8601	927.399		296.5	560.001
	875.524	97.0188		14.8801	889.142		297	563.799
	876.488	97.0504		14.9001	942.64		297.5	555.873
	877.452	97.0822		14.9201	899.977		298	554.583
	878.417	97.1137		14.9401	919.777		298.5	566.824
	879.381	97.1446		14.9601	914.229		299	566.986
	880.345	97.1752		14.9801	884.273		299.5	549.209
	881.309	97.2052		15.0001	906.399		300	534.483
	882.274	97.2345		15.0201	883.418		300.5	530.677
	883.238	97.2624		15.0401	872.41		301	534.951
	884.202	97.289		15.0601	836.436		301.5	548.052
	885.166	97.3144		15.0801	848.2		302	568.856
	886.13	97.3391		15.1001	830.789		302.5	578.867
	887.095	97.3637		15.1201	838.682		303	568.838
	888.059	97.3884		15.1401	905.792		303.5	569.209
	889.023	97.4127		15.1601	884.909		304	590.376
	889.987	97.4354		15.1801	870.782		304.5	597.361
	890.952	97.4549		15.2001	853.476		305	584.482
	891.916	97.47		15.2201	846.917		305.5	581.029
	892.88	97.4803		15.2401	861.738		306	584.64
	893.844	97.4866		15.2601	881.235		306.5	574.632
	894.808	97.4905		15.2801	813.545		307	566.895
	895.773	97.4945		15.3001	867.695		307.5	582.801
	896.737	97.5005		15.3201	913.492		308	597.779
	897.701	97.5096		15.3401	833.22		308.5	589.253
	898.665	97.5216		15.3601	858.774		309	571.214
	899.63	97.5352		15.3801	900.885		309.5	559.478
	900.594	97.5484		15.4001	791.623		310	563.035
	901.558	97.5593		15.4201	810.916		310.5	576.032
	902.522	97.5671		15.4401	832.701		311	579.943
	903.487	97.5718		15.4601	788.275		311.5	572.545
	904.451	97.5749		15.4801	816.921		312	562.062
	905.415	97.5776		15.5001	836.394		312.5	554.913
	906.379	97.5813		15.5201	811.579		313	554.546
	907.344	97.5862		15.5401	785.722		313.5	556.182
	908.308	97.5914		15.5601	823.074		314	556.836
	909.272	97.5948		15.5801	823.068		314.5	561.501
	910.236	97.5943		15.6001	814.037		315	565.529
	911.2	97.5885		15.6201	810.163		315.5	551.182
	912.165	97.5773		15.6401	786.547		316	532.928
	913.129	97.5624		15.6601	808.541		316.5	548.475
	914.093	97.5464		15.6801	836.304		317	579.857
	915.057	97.5329		15.7001	846.433		317.5	586.576
	916.022	97.5242		15.7201	780.821		318	576.164
	916.986	97.5216		15.7401	814.317		318.5	568.309
	917.95	97.5243		15.7601	818.96		319	569.22
	918.914	97.53		15.7801	786.473		319.5	578.012
	919.879	97.5358		15.8001	787.078		320	585.41
	920.843	97.5392		15.8201	793.66		320.5	586.265
	921.807	97.5387		15.8401	759.698		321	581.629
	922.771	97.5346		15.8601	824.093		321.5	573.809
	923.736	97.5284		15.8801	777.076		322	565.591
	924.7	97.5221		15.9001	817.203		322.5	558.26
	925.664	97.5175		15.9201	746.697		323	552.989
	926.628	97.5151		15.9401	767.802		323.5	553.61
	927.592	97.5144		15.9601	811.618		324	561.134
	928.557	97.5134		15.9801	812.217		324.5	567.217
	929.521	97.51		16.0001	808.138		325	568.3
	930.485	97.5023		16.0201	801.292		325.5	570.719
	931.449	97.489		16.0401	755.148		326	573.512
	932.414	97.4704		16.0601	755.213		326.5	568.6
	933.378	97.4477		16.0801	787.303		327	559.873
	934.342	97.423		16.1001	770.123		327.5	557.624
	935.306	97.3987		16.1201	744.726		328	564.385
	936.27	97.3765		16.1401	771.651		328.5	576.498
	937.235	97.3575		16.1601	779.377		329	578.814
	938.199	97.3415		16.1801	763.531		329.5	565.245
	939.163	97.3272		16.2001	772.784		330	554.075
	940.127	97.3122		16.2201	767.039		330.5	554.243
	941.092	97.294		16.2401	748.584		331	558.776
	942.056	97.2707		16.2601	783.096		331.5	565.657
	943.02	97.2413		16.2801	733.179		332	576.514
	943.984	97.2066		16.3001	751.56		332.5	582.145
	944.949	97.1687		16.3201	757.301		333	573.21
	945.913	97.1305		16.3401	755.706		333.5	566.007
	946.877	97.095		16.3601	776.539		334	573.428
	947.841	97.064		16.3801	734.421		334.5	577.664
	948.806	97.0379		16.4001	768.323		335	570.575
	949.77	97.0154		16.4201	782.795		335.5	568.75
	950.734	96.9943		16.4401	752.364		336	574.224
	951.698	96.9725		16.4601	741.665		336.5	572.891
	952.663	96.9485		16.4801	723.295		337	568.091
	953.627	96.9226		16.5001	737.623		337.5	571.636
	954.591	96.8959		16.5201	781.466		338	574.935
	955.555	96.8703		16.5401	724.361		338.5	568.699
	956.519	96.8473		16.5601	745.433		339	570.028
	957.484	96.8277		16.5801	747.126		339.5	586.734
	958.448	96.8111		16.6001	738.28		340	594.386
	959.412	96.7963		16.6201	733.235		340.5	585.712
	960.376	96.7822		16.6401	721.383		341	579.902
	961.341	96.768		16.6601	724.886		341.5	579.582
	962.305	96.7536		16.6801	717.067		342	574.401
	963.269	96.7397		16.7001	714.931		342.5	569.049
	964.233	96.7267		16.7201	686.47		343	571.658
	965.197	96.7147		16.7401	706.668		343.5	571.153
	966.162	96.7033		16.7601	738.897		344	561.801
	967.126	96.6914		16.7801	714.321		344.5	566.57
	968.09	96.678		16.8001	722.672		345	589.014
	969.054	96.6626		16.8201	748.018		345.5	595.298
	970.019	96.6462		16.8401	707.281		346	580.618
	970.983	96.6303		16.8601	760.895		346.5	570.171
	971.947	96.6173		16.8801	719.244		347	570.492
	972.911	96.6094		16.9001	705.985		347.5	576.512
	973.876	96.6077		16.9201	688.658		348	585.674
	974.84	96.612		16.9401	729.472		348.5	594.67
	975.804	96.6206		16.9601	731.79		349	594.621
	976.768	96.6315		16.9801	686.002		349.5	581.45
	977.732	96.6422		17.0001	727.393		350	562.801
	978.697	96.6509		17.0201	712.536		350.5	552.592
	979.661	96.6567		17.0401	681.096		351	568.042
	980.625	96.6593		17.0601	712.397		351.5	591.972
	981.59	96.6591		17.0801	744.201		352	588.899
	982.554	96.6562		17.1001	764.844		352.5	573
	983.518	96.6505		17.1201	695.87		353	571.754
	984.482	96.6417		17.1401	684.577		353.5	578.037
	985.446	96.629		17.1601	699.174		354	580.632
	986.411	96.6121		17.1801	709.704		354.5	578.944
	987.375	96.5914		17.2001	743.852		355	575.22
	988.339	96.5676		17.2201	698.814		355.5	573.72
	989.303	96.5426		17.2401	692.618		356	580.938
	990.268	96.5183		17.2601	682.583		356.5	601.515
	991.232	96.4969		17.2801	698.278		357	608.881
	992.196	96.4803		17.3001	663.116		357.5	575.703
	993.16	96.4696		17.3201	711.586		358	546.808
	994.125	96.4655		17.3401	682.422		358.5	561.385
	995.089	96.4682		17.3601	674.465		359	584.687
	996.053	96.4773		17.3801	705.933		359.5	589.702
	997.017	96.4924		17.4001	689.614		360	582.217
	997.981	96.5128		17.4201	673.081		360.5	575.906
	998.946	96.5379		17.4401	697.259		361	585.852
	999.91	96.5673		17.4601	672.652		361.5	592.242
	1000.87	96.6002		17.4801	670.688		362	566.329
	1001.84	96.6359		17.5001	679.866		362.5	544.823
	1002.8	96.6735		17.5201	701.88		363	563.021
	1003.77	96.712		17.5401	697.235		363.5	580.906
	1004.73	96.75		17.5601	650.884		364	574.202
	1005.7	96.7866		17.5801	643.497		364.5	573.196
	1006.66	96.8209		17.6001	718.879		365	585.228
	1007.62	96.8526		17.6201	684.643		365.5	587.185
	1008.59	96.8817		17.6401	611.953		366	576.874
	1009.55	96.9091		17.6601	666.351		366.5	567.052
	1010.52	96.9357		17.6801	671.966		367	568.341
	1011.48	96.9625		17.7001	626.914		367.5	584.053
	1012.45	96.9898		17.7201	659.344		368	594.728
	1013.41	97.0174		17.7401	690.968		368.5	587.964
	1014.37	97.0441		17.7601	679.692		369	576.729
	1015.34	97.0684		17.7801	655.869		369.5	571.104
	1016.3	97.0888		17.8001	722.757		370	573.214
	1017.27	97.1044		17.8201	721.097		370.5	579.104
	1018.23	97.1153		17.8401	682.211		371	581.446
	1019.2	97.1224		17.8601	664.852		371.5	579
	1020.16	97.1272		17.8801	660.04		372	573.558
	1021.12	97.1307		17.9001	665.515		372.5	568.11
	1022.09	97.1335		17.9201	705.608		373	565.756
	1023.05	97.1349		17.9401	673.831		373.5	569.053
	1024.02	97.1339		17.9601	638.676		374	575.521
	1024.98	97.1289		17.9801	682.544		374.5	576.546
	1025.94	97.1192		18.0001	694.97		375	572.051
	1026.91	97.1052		18.0201	704.698		375.5	568.687
	1027.87	97.0883		18.0401	656.173		376	568.93
	1028.84	97.0705		18.0601	678.126		376.5	572.222
	1029.8	97.0539		18.0801	686.385		377	573.94
	1030.77	97.0394		18.1001	628.595		377.5	570.953
	1031.73	97.0267		18.1201	670.91		378	566.497
	1032.69	97.0141		18.1401	654.348		378.5	565.204
	1033.66	96.9989		18.1601	637.772		379	571.598
	1034.62	96.9788		18.1801	604.008		379.5	577.069
	1035.59	96.9525		18.2001	681.113		380	565.196
	1036.55	96.92		18.2201	686.717		380.5	549.359
	1037.52	96.8826		18.2401	651.324		381	551.948
	1038.48	96.8425		18.2601	675.048		381.5	566.201
	1039.44	96.8017		18.2801	648.764		382	576.995
	1040.41	96.7617		18.3001	665.928		382.5	569.765
	1041.37	96.723		18.3201	668.457		383	551.875
	1042.34	96.6852		18.3401	651.548		383.5	561.078
	1043.3	96.6482		18.3601	634.971		384	587.807
	1044.27	96.6118		18.3801	654.544		384.5	584.699
	1045.23	96.5772		18.4001	663.185		385	565.675
	1046.19	96.5462		18.4201	691.369		385.5	568.027
	1047.16	96.5213		18.4401	700.8		386	580.257
	1048.12	96.5046		18.4601	684.626		386.5	585.923
	1049.09	96.4975		18.4801	640.921		387	595.388
	1050.05	96.4997		18.5001	653.631		387.5	607.162
	1051.01	96.5101		18.5201	640.626		388	596.481
	1051.98	96.5263		18.5401	646.164		388.5	575.911
	1052.94	96.5453		18.5601	632.045		389	587.82
	1053.91	96.5643		18.5801	628.882		389.5	611.356
	1054.87	96.5808		18.6001	650.669		390	603.852
	1055.84	96.5928		18.6201	652.641		390.5	587.914
	1056.8	96.5994		18.6401	665.144		391	590.962
	1057.76	96.5997		18.6601	644.927		391.5	598.836
	1058.73	96.594		18.6801	657.2		392	596.402
	1059.69	96.5826		18.7001	655.49		392.5	579.043
	1060.66	96.5667		18.7201	654.096		393	563.364
	1061.62	96.5478		18.7401	675.931		393.5	578.837
	1062.59	96.5276		18.7601	688.537		394	598.903
	1063.55	96.5078		18.7801	672.904		394.5	582.872
	1064.51	96.4896		18.8001	626.515		395	572.235
	1065.48	96.4736		18.8201	663.299		395.5	599.422
	1066.44	96.4597		18.8401	633.581		396	603.574
	1067.41	96.4471		18.8601	638.245		396.5	567.229
	1068.37	96.4347		18.8801	659.979		397	561.321
	1069.34	96.4211		18.9001	651.399		397.5	587.968
	1070.3	96.4056		18.9201	613.278		398	588.016
	1071.26	96.3878		18.9401	665.453		398.5	580.323
	1072.23	96.3681		18.9601	668.851		399	608.825
	1073.19	96.3472		18.9801	642.58		399.5	629.942
	1074.16	96.3259		19.0001	667.042		400	604.217
	1075.12	96.3051		19.0201	637.389		400.5	572.66
	1076.08	96.2855		19.0401	641.382		401	565.115
	1077.05	96.2678		19.0601	641.735		401.5	574.42
	1078.01	96.2524		19.0801	636.889		402	585.334
	1078.98	96.24		19.1001	657.828		402.5	580.974
	1079.94	96.2309		19.1201	638.566		403	570.299
	1080.91	96.2257		19.1401	612.698		403.5	571.904
	1081.87	96.2243		19.1601	639.659		404	585.648
	1082.83	96.2265		19.1801	638.384		404.5	602.811
	1083.8	96.2316		19.2001	648.903		405	607.053
	1084.76	96.2384		19.2201	631.91		405.5	595.023
	1085.73	96.246		19.2401	654.632		406	583.643
	1086.69	96.2538		19.2601	662.615		406.5	582.543
	1087.65	96.2615		19.2801	646.473		407	592.277
	1088.62	96.2695		19.3001	645.939		407.5	600.948
	1089.58	96.2784		19.3201	638.411		408	596.797
	1090.55	96.289		19.3401	651.731		408.5	594.737
	1091.51	96.3016		19.3601	648.379		409	604.779
	1092.48	96.3162		19.3801	660.849		409.5	608.235
	1093.44	96.3324		19.4001	623.834		410	597.061
	1094.4	96.3494		19.4201	631.183		410.5	583.203
	1095.37	96.3667		19.4401	627.887		411	576.062
	1096.33	96.3837		19.4601	619.647		411.5	580.687
	1097.3	96.4002		19.4801	663.855		412	592.948
	1098.26	96.416		19.5001	681.363		412.5	603.04
	1099.23	96.4312		19.5201	625.893		413	595.068
	1100.19	96.4457		19.5401	587.726		413.5	568.322
	1101.15	96.4595		19.5601	642.167		414	557.841
	1102.12	96.4731		19.5801	622.852		414.5	572.238
	1103.08	96.4869		19.6001	615.41		415	582.572
	1104.05	96.5017		19.6201	633.352		415.5	579.427
	1105.01	96.5177		19.6401	632.203		416	570.913
	1105.98	96.5352		19.6601	563.805		416.5	575.718
	1106.94	96.5532		19.6801	633.145		417	604.377
	1107.9	96.5703		19.7001	647.003		417.5	623.578
	1108.87	96.585		19.7201	621.974		418	614.581
	1109.83	96.5959		19.7401	643.017		418.5	606.125
	1110.8	96.6025		19.7601	607.664		419	607.552
	1111.76	96.6057		19.7801	633.348		419.5	601.033
	1112.72	96.6068		19.8001	602.57		420	581.306
	1113.69	96.6081		19.8201	617.484		420.5	554.589
	1114.65	96.611		19.8401	600.467		421	540.986
	1115.62	96.6167		19.8601	630.19		421.5	555.739
	1116.58	96.625		19.8801	634.184		422	582.806
	1117.55	96.6353		19.9001	640.973		422.5	602.945
	1118.51	96.6467		19.9201	612.035		423	603.026
	1119.47	96.6586		19.9401	646.7		423.5	591.392
	1120.44	96.6713		19.9601	668.574		424	593.718
	1121.4	96.6856		19.9801	603.019		424.5	598.519
	1122.37	96.7027		20.0001	643.336		425	582.147
	1123.33	96.7231		20.0201	619.909		425.5	570.117
	1124.3	96.7468		20.0401	637.652		426	585.207
	1125.26	96.7729		20.0601	619.624		426.5	599.918
	1126.22	96.7997		20.0801	598.943		427	595.48
	1127.19	96.825		20.1001	647.551		427.5	579.6
	1128.15	96.8473		20.1201	617.113		428	569.782
	1129.12	96.8653		20.1401	640.676		428.5	585.688
	1130.08	96.8789		20.1601	620.806		429	608.633
	1131.05	96.8889		20.1801	624.722		429.5	609.558
	1132.01	96.8968		20.2001	602.057		430	597.696
	1132.97	96.9045		20.2201	636.091		430.5	588.866
	1133.94	96.9136		20.2401	588.592		431	589.809
	1134.9	96.9256		20.2601	594.132		431.5	598.28
	1135.87	96.941		20.2801	598.679		432	602.157
	1136.83	96.9598		20.3001	612.155		432.5	593.298
	1137.8	96.981		20.3201	644.381		433	571.068
	1138.76	97.0033		20.3401	626.171		433.5	562.349
	1139.72	97.0256		20.3601	645.057		434	587.228
	1140.69	97.0471		20.3801	640.074		434.5	599.862
	1141.65	97.0683		20.4001	603.077		435	577.642
	1142.62	97.0902		20.4201	587.693		435.5	570.987
	1143.58	97.1144		20.4401	605.242		436	587.633
	1144.55	97.1422		20.4601	613.709		436.5	583.515
	1145.51	97.1738		20.4801	617.167		437	569.984
	1146.47	97.2078		20.5001	589.902		437.5	583.98
	1147.44	97.2422		20.5201	617.972		438	597.997
	1148.4	97.2738		20.5401	588.555		438.5	582.668
	1149.37	97.3		20.5601	642.174		439	569.33
	1150.33	97.3197		20.5801	620.265		439.5	574.338
	1151.3	97.3332		20.6001	609.127		440	573.518
	1152.26	97.3425		20.6201	619.898		440.5	565.489
	1153.22	97.3504		20.6401	630.665		441	569.643
	1154.19	97.3594		20.6601	627.916		441.5	576.048
	1155.15	97.3709		20.6801	583.399		442	566.626
	1156.12	97.385		20.7001	624.423		442.5	556.066
	1157.08	97.4		20.7201	627.803		443	560.876
	1158.04	97.4142		20.7401	633.942		443.5	579.956
	1159.01	97.4258		20.7601	650.177		444	597.891
	1159.97	97.4336		20.7801	583.038		444.5	586.899
	1160.94	97.438		20.8001	609.497		445	561.451
	1161.9	97.4398		20.8201	622.071		445.5	560.554
	1162.87	97.4406		20.8401	588.261		446	572.39
	1163.83	97.4416		20.8601	607.606		446.5	575.156
	1164.79	97.4435		20.8801	629.891		447	585.886
	1165.76	97.4464		20.9001	613.386		447.5	608.81
	1166.72	97.45		20.9201	582.967		448	609.807
	1167.69	97.4536		20.9401	655.833		448.5	587.64
	1168.65	97.4568		20.9601	588.469		449	576.863
	1169.62	97.4593		20.9801	572.769		449.5	582.294
	1170.58	97.4607		21.0001	627.679		450	591.208
	1171.54	97.4611		21.0201	605.674		450.5	596.262
	1172.51	97.4607		21.0401	596.555		451	593.836
	1173.47	97.4595		21.0601	621.17		451.5	585.548
	1174.44	97.4583		21.0801	617.65		452	574.956
	1175.4	97.4581		21.1001	591.143		452.5	567.531
	1176.37	97.4599		21.1201	598.925		453	574.437
	1177.33	97.4648		21.1401	626.74		453.5	605.456
	1178.29	97.4738		21.1601	600.011		454	625.961
	1179.26	97.487		21.1801	584.895		454.5	601.838
	1180.22	97.504		21.2001	585.526		455	577.461
	1181.19	97.5236		21.2201	642.112		455.5	584.322
	1182.15	97.5443		21.2401	607.293		456	590.73
	1183.11	97.5647		21.2601	582.013		456.5	587.276
	1184.08	97.5833		21.2801	584.329		457	595.347
	1185.04	97.5996		21.3001	580.214		457.5	605.94
	1186.01	97.6133		21.3201	609.507		458	595.803
	1186.97	97.6248		21.3401	639.044		458.5	575.995
	1187.93	97.6347		21.3601	657.776		459	565.883
	1188.9	97.6439		21.3801	624.155		459.5	574.1
	1189.86	97.6534		21.4001	606.731		460	592.53
	1190.83	97.6638		21.4201	597.405		460.5	592.215
	1191.79	97.6756		21.4401	587.279		461	579.604
	1192.76	97.689		21.4601	639.215		461.5	587.095
	1193.72	97.7036		21.4801	618.429		462	597
	1194.68	97.7189		21.5001	618.621		462.5	580.985
	1195.65	97.7339		21.5201	598.344		463	565.58
	1196.61	97.7478		21.5401	580.915		463.5	573.738
	1197.58	97.7597		21.5601	617.756		464	592.452
	1198.54	97.7693		21.5801	598.89		464.5	604.969
	1199.51	97.7766		21.6001	624.744		465	597.283
	1200.47	97.7818		21.6201	586.899		465.5	577.859
	1201.43	97.7856		21.6401	570.123		466	567.124
	1202.4	97.7886		21.6601	606.455		466.5	571.244
	1203.36	97.7911		21.6801	629.487		467	584.956
	1204.33	97.7932		21.7001	606.177		467.5	585.083
	1205.29	97.7946		21.7201	629.944		468	569.3
	1206.26	97.7949		21.7401	616.321		468.5	569.901
	1207.22	97.7931		21.7601	666.533		469	586.362
	1208.18	97.7887		21.7801	612.219		469.5	591.382
	1209.15	97.7811		21.8001	580.013		470	582.86
	1210.11	97.7703		21.8201	584.219		470.5	572.93
	1211.08	97.7564		21.8401	591.906		471	581.979
	1212.04	97.7401		21.8601	577.003		471.5	611.825
	1213.01	97.7221		21.8801	578.444		472	624.27
	1213.97	97.7031		21.9001	583.25		472.5	611.398
	1214.93	97.6838		21.9201	566.547		473	601.797
	1215.9	97.6644		21.9401	556.112		473.5	599.288
	1216.86	97.6449		21.9601	592.23		474	594.018
	1217.83	97.6255		21.9801	597.919		474.5	589.765
	1218.79	97.606		22.0001	616.566		475	589.883
	1219.76	97.587		22.0201	560.231		475.5	585.061
	1220.72	97.569		22.0401	590.455		476	577.283
	1221.68	97.5532		22.0601	584.807		476.5	585.589
	1222.65	97.5408		22.0801	580.077		477	600.949
	1223.61	97.5329		22.1001	575.199		477.5	597.208
	1224.58	97.5302		22.1201	583.309		478	588.98
	1225.54	97.5331		22.1401	557.65		478.5	596.428
	1226.51	97.5415		22.1601	549.977		479	598.349
	1227.47	97.5552		22.1801	591.216		479.5	581.755
	1228.43	97.5738		22.2001	525.926		480	564.882
	1229.4	97.597		22.2201	601.262		480.5	564.543
	1230.36	97.6248		22.2401	574.192		481	588.88
	1231.33	97.6569		22.2601	572.709		481.5	608.983
	1232.29	97.6934		22.2801	535.524		482	589.969
	1233.25	97.734		22.3001	544.757		482.5	562.525
	1234.22	97.7782		22.3201	530.791		483	558.274
	1235.18	97.8251		22.3401	560.229		483.5	567.44
	1236.15	97.8739		22.3601	588.124		484	580.138
	1237.11	97.9235		22.3801	561.737		484.5	593.364
	1238.08	97.9726		22.4001	545.302		485	598.566
	1239.04	98.0199		22.4201	570.273		485.5	587.003
	1240	98.0641		22.4401	544.454		486	573.101
	1240.97	98.1043		22.4601	522.664		486.5	572.509
	1241.93	98.1394		22.4801	515.618		487	579.579
	1242.9	98.1694		22.5001	521.517		487.5	584.768
	1243.86	98.1944		22.5201	503.83		488	579.557
	1244.83	98.2156		22.5401	531.391		488.5	573.89
	1245.79	98.2342		22.5601	553.639		489	588.646
	1246.75	98.2517		22.5801	535.198		489.5	609.263
	1247.72	98.2693		22.6001	469.361		490	611.975
	1248.68	98.2872		22.6201	514.208		490.5	600.184
	1249.65	98.3051		22.6401	543.729		491	585.605
	1250.61	98.322		22.6601	572.575		491.5	583.014
	1251.58	98.3367		22.6801	529.014		492	593.516
	1252.54	98.3479		22.7001	540.815		492.5	603.621
	1253.5	98.3551		22.7201	496.93		493	599.863
	1254.47	98.3582		22.7401	474.142		493.5	577.353
	1255.43	98.3582		22.7601	514.291		494	569.644
	1256.4	98.3563		22.7801	537.651		494.5	593.841
	1257.36	98.3536		22.8001	474.246		495	602.653
	1258.32	98.3514		22.8201	513.712		495.5	585.044
	1259.29	98.35		22.8401	523.841		496	583.163
	1260.25	98.3496		22.8601	532.027		496.5	592.063
	1261.22	98.3497		22.8801	523.023		497	581.819
	1262.18	98.3503		22.9001	536.554		497.5	575.877
	1263.15	98.3512		22.9201	480.583		498	597.105
	1264.11	98.3528		22.9401	507.59		498.5	611.915
	1265.07	98.3556		22.9601	477.683		499	602.016
	1266.04	98.3602		22.9801	462.605		499.5	586.536
	1267	98.3667		23.0001	494.983		500	579.683
	1267.97	98.3749		23.0201	527.625		500.5	586.891
	1268.93	98.3845		23.0401	502.084		501	597.299
	1269.89	98.3946		23.0601	508.954		501.5	596.38
	1270.86	98.4046		23.0801	494.654		502	581.444
	1271.82	98.4141		23.1001	483.539		502.5	563.565
	1272.79	98.4231		23.1201	507.767		503	572.004
	1273.75	98.4319		23.1401	481.359		503.5	598.782
	1274.72	98.4412		23.1601	471.192		504	602.828
	1275.68	98.4519		23.1801	470.364		504.5	585.319
	1276.64	98.4646		23.2001	492.99		505	567.566
	1277.61	98.4798		23.2201	524.941		505.5	560.9
	1278.57	98.497		23.2401	482.346		506	568.914
	1279.54	98.5154		23.2601	472.306		506.5	584.452
	1280.5	98.5337		23.2801	456.158		507	595.747
	1281.47	98.5502		23.3001	516.052		507.5	589.643
	1282.43	98.5636		23.3201	448.372		508	576.547
	1283.39	98.5732		23.3401	474.582		508.5	576.209
	1284.36	98.579		23.3601	489.646		509	584.556
	1285.32	98.5818		23.3801	484.654		509.5	590.588
	1286.29	98.5831		23.4001	426.607		510	584.845
	1287.25	98.5846		23.4201	468.205		510.5	573.497
	1288.22	98.5877		23.4401	457.656		511	580.353
	1289.18	98.5935		23.4601	450.547		511.5	600.855
	1290.14	98.6019		23.4801	493.361		512	612.411
	1291.11	98.6125		23.5001	437.271		512.5	606.248
	1292.07	98.6246		23.5201	441.986		513	587.866
	1293.04	98.6374		23.5401	443.91		513.5	588.216
	1294	98.6505		23.5601	455.784		514	610.043
	1294.96	98.664		23.5801	458.009		514.5	611.228
	1295.93	98.6781		23.6001	478.602		515	584.511
	1296.89	98.6934		23.6201	426.229		515.5	553.519
	1297.86	98.7103		23.6401	450.065		516	549.352
	1298.82	98.7289		23.6601	485.27		516.5	585.344
	1299.79	98.7486		23.6801	449.972		517	609.728
	1300.75	98.7689		23.7001	470.24		517.5	594.883
	1301.71	98.7889		23.7201	470.339		518	573.153
	1302.68	98.8079		23.7401	467.605		518.5	562.011
	1303.64	98.8252		23.7601	499.406		519	561.532
	1304.61	98.8406		23.7801	504.597		519.5	575.631
	1305.57	98.854		23.8001	467.985		520	602.483
	1306.54	98.8654		23.8201	447.47		520.5	611.863
	1307.5	98.8749		23.8401	442.89		521	592.453
	1308.46	98.8828		23.8601	436.924		521.5	578.528
	1309.43	98.8892		23.8801	441.934		522	580.201
	1310.39	98.8942		23.9001	436.391		522.5	582.014
	1311.36	98.8978		23.9201	471.438		523	588.884
	1312.32	98.8999		23.9401	433.179		523.5	609.903
	1313.29	98.9005		23.9601	430.019		524	626.072
	1314.25	98.8994		23.9801	448.732		524.5	623.796
	1315.21	98.897		24.0001	414.009		525	614.407
	1316.18	98.8934		24.0201	478.819		525.5	601.441
	1317.14	98.8893		24.0401	453.158		526	579.226
	1318.11	98.8851		24.0601	459.704		526.5	564.05
	1319.07	98.8814		24.0801	442.998		527	575.501
	1320.04	98.8785		24.1001	453.297		527.5	590.847
	1321	98.8764		24.1201	451.476		528	590.754
	1321.96	98.8751		24.1401	448.111		528.5	589.087
	1322.93	98.8745		24.1601	409.081		529	592.729
	1323.89	98.8746		24.1801	375.389		529.5	595.769
	1324.86	98.8753		24.2001	455.155		530	594.294
	1325.82	98.8767		24.2201	479.638		530.5	588.214
	1326.79	98.8788		24.2401	455.306		531	587.971
	1327.75	98.8813		24.2601	437.094		531.5	597.426
	1328.71	98.8839		24.2801	429.991		532	597.878
	1329.68	98.886		24.3001	425.685		532.5	584.639
	1330.64	98.8872		24.3201	437.62		533	573.502
	1331.61	98.8872		24.3401	417.285		533.5	572.534
	1332.57	98.8863		24.3601	418.353		534	582.466
	1333.54	98.8848		24.3801	425.507		534.5	596.012
	1334.5	98.883		24.4001	436.536		535	606.278
	1335.46	98.8814		24.4201	449.265		535.5	613.55
	1336.43	98.8801		24.4401	433.053		536	611.771
	1337.39	98.8788		24.4601	471.261		536.5	588.771
	1338.36	98.8772		24.4801	424.26		537	577.734
	1339.32	98.8745		24.5001	429.77		537.5	622.285
	1340.28	98.8705		24.5201	443.504		538	649.655
	1341.25	98.8648		24.5401	438.13		538.5	604.765
	1342.21	98.8576		24.5601	451.439		539	585.859
	1343.18	98.8494		24.5801	415.331		539.5	625.031
	1344.14	98.8407		24.6001	425.234		540	635.133
	1345.11	98.832		24.6201	434.82		540.5	612.865
	1346.07	98.824		24.6401	440.266		541	609.39
	1347.03	98.8173		24.6601	423.004		541.5	604.902
	1348	98.8122		24.6801	424.941		542	577.015
	1348.96	98.8088		24.7001	449.522		542.5	567.797
	1349.93	98.8069		24.7201	442.388		543	592.539
	1350.89	98.8057		24.7401	429.432		543.5	614.066
	1351.86	98.8039		24.7601	411.388		544	611.487
	1352.82	98.8006		24.7801	419.665		544.5	585.05
	1353.78	98.7951		24.8001	412.584		545	572.977
	1354.75	98.7875		24.8201	449.304		545.5	599.516
	1355.71	98.7786		24.8401	450.257		546	610.126
	1356.68	98.7698		24.8601	416.456		546.5	584.027
	1357.64	98.7627		24.8801	428.123		547	566.839
	1358.61	98.7588		24.9001	413.993		547.5	578.365
	1359.57	98.7589		24.9201	440.665		548	610.823
	1360.53	98.7633		24.9401	404.157		548.5	628.9
	1361.5	98.7715		24.9601	405.451		549	609.279
	1362.46	98.782		24.9801	429.296		549.5	591.923
	1363.43	98.7933		25.0001	426.403		550	598.401
	1364.39	98.8038		25.0201	454.596		550.5	608.498
	1365.35	98.8122		25.0401	440.221		551	612.799
	1366.32	98.8178		25.0601	433.082		551.5	611.25
	1367.28	98.8205		25.0801	426.933		552	596.533
	1368.25	98.8204		25.1001	387.716		552.5	571.111
	1369.21	98.818		25.1201	402.099		553	573.53
	1370.18	98.814		25.1401	395.927		553.5	606.429
	1371.14	98.8096		25.1601	415.369		554	615.143
	1372.1	98.8064		25.1801	418.225		554.5	601.897
	1373.07	98.8056		25.2001	397.012		555	605.762
	1374.03	98.8083		25.2201	423.944		555.5	611.646
	1375	98.8144		25.2401	403.767		556	600.903
	1375.96	98.8229		25.2601	421.89		556.5	603.793
	1376.92	98.8322		25.2801	398.142		557	625.506
	1377.89	98.8407		25.3001	438.465		557.5	626.041
	1378.85	98.8472		25.3201	393.432		558	600.966
	1379.82	98.8511		25.3401	400.852		558.5	574.39
	1380.78	98.8529		25.3601	396.636		559	569.243
	1381.75	98.8531		25.3801	420.892		559.5	592.484
	1382.71	98.8531		25.4001	380.674		560	608.982
	1383.67	98.8535		25.4201	388.499		560.5	605.271
	1384.64	98.8554		25.4401	396.753		561	605.947
	1385.6	98.8591		25.4601	372.435		561.5	608.653
	1386.57	98.8649		25.4801	377.314		562	596.314
	1387.53	98.8722		25.5001	405.854		562.5	588.345
	1388.5	98.8808		25.5201	392.466		563	603.368
	1389.46	98.8898		25.5401	431.154		563.5	622.356
	1390.42	98.8988		25.5601	432.848		564	628.262
	1391.39	98.9076		25.5801	408.663		564.5	616.581
	1392.35	98.9157		25.6001	403.09		565	602.478
	1393.32	98.9232		25.6201	425.226		565.5	607.349
	1394.28	98.93		25.6401	401.848		566	615.262
	1395.25	98.9359		25.6601	394.821		566.5	608.586
	1396.21	98.9411		25.6801	375.245		567	598.401
	1397.17	98.9455		25.7001	409.769		567.5	596.496
	1398.14	98.9494		25.7201	395.348		568	608.156
	1399.1	98.9529		25.7401	423.003		568.5	619.831
	1400.07	98.9561		25.7601	413.957		569	613.225
	1401.03	98.9593		25.7801	402.712		569.5	608.788
	1401.99	98.9626		25.8001	377.088		570	620.887
	1402.96	98.9664		25.8201	414.949		570.5	620.285
	1403.92	98.9711		25.8401	418.679		571	604.894
	1404.89	98.9768		25.8601	418.345		571.5	608.689
	1405.85	98.9838		25.8801	438.811		572	619.981
	1406.82	98.992		25.9001	426.384		572.5	607.872
	1407.78	99.001		25.9201	378.263		573	590.75
	1408.74	99.0102		25.9401	427.796		573.5	592.592
	1409.71	99.0191		25.9601	400.38		574	616.025
	1410.67	99.0272		25.9801	407.975		574.5	640.136
	1411.64	99.034		26.0001	395.888		575	627.338
	1412.6	99.0396		26.0201	424.314		575.5	605.124
	1413.57	99.0445		26.0401	416.302		576	619.191
	1414.53	99.0493		26.0601	401.559		576.5	631.683
	1415.49	99.0552		26.0801	366.554		577	609.884
	1416.46	99.0631		26.1001	425.313		577.5	578.363
	1417.42	99.0741		26.1201	392.773		578	567.189
	1418.39	99.0883		26.1401	362.427		578.5	597.534
	1419.35	99.105		26.1601	384.795		579	626.008
	1420.32	99.1226		26.1801	390.929		579.5	602.699
	1421.28	99.1401		26.2001	367.43		580	583.885
	1422.24	99.1568		26.2201	383.748		580.5	605.289
	1423.21	99.1732		26.2401	398.753		581	616.549
	1424.17	99.1903		26.2601	423.941		581.5	605.28
	1425.14	99.209		26.2801	411.197		582	600.683
	1426.1	99.23		26.3001	395.599		582.5	604.132
	1427.07	99.2533		26.3201	387.06		583	606.488
	1428.03	99.2782		26.3401	427.064		583.5	610.823
	1428.99	99.3036		26.3601	360.215		584	615.056
	1429.96	99.328		26.3801	379.392		584.5	605.218
	1430.92	99.3506		26.4001	383.548		585	590.043
	1431.89	99.3711		26.4201	389.705		585.5	593.678
	1432.85	99.3899		26.4401	357.41		586	605.742
	1433.82	99.4079		26.4601	421.771		586.5	607.672
	1434.78	99.4263		26.4801	372.655		587	601.129
	1435.74	99.4462		26.5001	379.033		587.5	590.156
	1436.71	99.4684		26.5201	351.945		588	577.094
	1437.67	99.4931		26.5401	397.533		588.5	572.968
	1438.64	99.5198		26.5601	402.914		589	590.305
	1439.6	99.5478		26.5801	374.32		589.5	610.87
	1440.56	99.5764		26.6001	387.033		590	614.951
	1441.53	99.605		26.6201	373.087		590.5	609.397
	1442.49	99.6334		26.6401	373.126		591	604.708
	1443.46	99.6616		26.6601	378.355		591.5	608.705
	1444.42	99.6896		26.6801	375.428		592	609.754
	1445.39	99.7175		26.7001	369.388		592.5	591.226
	1446.35	99.7452		26.7201	370.635		593	576.027
	1447.31	99.7721		26.7401	362.704		593.5	584.098
	1448.28	99.7976		26.7601	359.627		594	599.216
	1449.24	99.821		26.7801	370.743		594.5	603.668
	1450.21	99.842		26.8001	401.954		595	587.024
	1451.17	99.8608		26.8201	366.333		595.5	569.153
	1452.13	99.8784		26.8401	358.648		596	578.225
	1453.1	99.8964		26.8601	398.582		596.5	603.108
	1454.06	99.9169		26.8801	378.819		597	624.701
	1455.03	99.9419		26.9001	393.541		597.5	630.283
	1455.99	99.972		26.9201	386.5		598	625.899
	1456.96	100.005		26.9401	402.201		598.5	631.19
	1457.92	100.038		26.9601	392.23		599	629.495
	1458.88	100.067		26.9801	418.937		599.5	601.601
	1459.85	100.09		27.0001	374.92		600	585.161
	1460.81	100.109		27.0201	386.555		600.5	601.199
	1461.78	100.126		27.0401	406.955		601	620.448
	1462.74	100.144		27.0601	380.114		601.5	625.708
	1463.71	100.165		27.0801	414.548		602	616.763
	1464.67	100.189		27.1001	425.022		602.5	610.09
	1465.63	100.215		27.1201	389.788		603	616.352
	1466.6	100.241		27.1401	376.12		603.5	609.009
	1467.56	100.267		27.1601	381.667		604	590.704
	1468.53	100.292		27.1801	389.257		604.5	610.849
	1469.49	100.317		27.2001	404.186		605	645.706
	1470.46	100.344		27.2201	397.24		605.5	634.283
	1471.42	100.374		27.2401	375.656		606	611.338
	1472.38	100.409		27.2601	383.934		606.5	615.342
	1473.35	100.446		27.2801	358.751		607	612.459
	1474.31	100.482		27.3001	356.789		607.5	594.758
	1475.28	100.513		27.3201	403.273		608	595.515
	1476.24	100.539		27.3401	403.769		608.5	607.761
	1477.2	100.559		27.3601	383.084		609	606.967
	1478.17	100.576		27.3801	385.844		609.5	604.272
	1479.13	100.593		27.4001	384.142		610	610.188
	1480.1	100.609		27.4201	370.328		610.5	613.77
	1481.06	100.626		27.4401	401.629		611	610.346
	1482.03	100.642		27.4601	402.249		611.5	604.802
	1482.99	100.658		27.4801	376.574		612	607.41
	1483.95	100.672		27.5001	377.542		612.5	623.091
	1484.92	100.684		27.5201	370.931		613	629.358
	1485.88	100.697		27.5401	385.208		613.5	618.446
	1486.85	100.709		27.5601	392.16		614	615.29
	1487.81	100.723		27.5801	378.827		614.5	617.027
	1488.78	100.738		27.6001	377.536		615	601.635
	1489.74	100.754		27.6201	395.11		615.5	584.97
	1490.7	100.769		27.6401	387.619		616	585.593
	1491.67	100.784		27.6601	375.809		616.5	587.927
	1492.63	100.799		27.6801	378.343		617	589.029
	1493.6	100.813		27.7001	374.234		617.5	607.733
	1494.56	100.829		27.7201	383.459		618	626.747
	1495.53	100.846		27.7401	362.54		618.5	614.059
	1496.49	100.864		27.7601	351.591		619	588.531
	1497.45	100.882		27.7801	367.422		619.5	578.354
	1498.42	100.898		27.8001	400.123		620	596.254
	1499.38	100.913		27.8201	381.209		620.5	628.376
	1500.35	100.925		27.8401	383.71		621	639.024
	1501.31	100.937		27.8601	376.552		621.5	633.926
	1502.28	100.95		27.8801	372.428		622	635.523
	1503.24	100.965		27.9001	356.074		622.5	645.472
	1504.2	100.981		27.9201	368.786		623	656.481
	1505.17	101		27.9401	372.305		623.5	655.187
	1506.13	101.018		27.9601	374.467		624	645.198
	1507.1	101.034		27.9801	364.959		624.5	641.526
	1508.06	101.046		28.0001	397.782		625	635.761
	1509.03	101.056		28.0201	376.362		625.5	618.572
	1509.99	101.064		28.0401	370.841		626	606.005
	1510.95	101.072		28.0601	367.39		626.5	609.386
	1511.92	101.081		28.0801	373.219		627	625.996
	1512.88	101.091		28.1001	380.582		627.5	638.03
	1513.85	101.099		28.1201	341.519		628	626.328
	1514.81	101.107		28.1401	374.981		628.5	611.172
	1515.78	101.114		28.1601	381.194		629	611.035
	1516.74	101.12		28.1801	350.503		629.5	613.584
	1517.7	101.124		28.2001	364.531		630	609.355
	1518.67	101.128		28.2201	337.841		630.5	598.327
	1519.63	101.131		28.2401	365.195		631	597.327
	1520.6	101.132		28.2601	384.401		631.5	620.24
	1521.56	101.131		28.2801	374.346		632	639.165
	1522.52	101.129		28.3001	390.515		632.5	635.384
	1523.49	101.128		28.3201	361.79		633	621.651
	1524.45	101.128		28.3401	371.043		633.5	606.283
	1525.42	101.128		28.3601	366.205		634	593.087
	1526.38	101.128		28.3801	331.027		634.5	595.861
	1527.35	101.127		28.4001	360.211		635	619.643
	1528.31	101.122		28.4201	390.464		635.5	635.367
	1529.27	101.115		28.4401	348.303		636	630.933
	1530.24	101.106		28.4601	369.72		636.5	622.669
	1531.2	101.096		28.4801	336.626		637	617.152
	1532.17	101.089		28.5001	355.78		637.5	614.563
	1533.13	101.085		28.5201	355.086		638	618.922
	1534.1	101.087		28.5401	360.34		638.5	630.883
	1535.06	101.092		28.5601	344.935		639	642.255
	1536.02	101.1		28.5801	370.203		639.5	646.427
	1536.99	101.108		28.6001	391.503		640	641.44
	1537.95	101.114		28.6201	372.35		640.5	641.639
	1538.92	101.118		28.6401	336.672		641	656.016
	1539.88	101.12		28.6601	346.928		641.5	652.584
	1540.85	101.12		28.6801	345.598		642	624.351
	1541.81	101.119		28.7001	354.156		642.5	611.884
	1542.77	101.116		28.7201	400.341		643	621.684
	1543.74	101.11		28.7401	362.553		643.5	633.634
	1544.7	101.101		28.7601	395.672		644	632.072
	1545.67	101.091		28.7801	335.652		644.5	616.888
	1546.63	101.08		28.8001	349.333		645	618.861
	1547.59	101.07		28.8201	352.945		645.5	639.176
	1548.56	101.06		28.8401	350.12		646	644.963
	1549.52	101.052		28.8601	340.482		646.5	634.696
	1550.49	101.043		28.8801	345.316		647	623.375
	1551.45	101.033		28.9001	352.226		647.5	622.32
	1552.42	101.021		28.9201	364.933		648	631.813
	1553.38	101.007		28.9401	364.148		648.5	636.509
	1554.34	100.99		28.9601	356.77		649	641.961
	1555.31	100.969		28.9801	342.419		649.5	663.319
	1556.27	100.946		29.0001	393.585		650	664.989
	1557.24	100.921		29.0201	400.539		650.5	625.943
	1558.2	100.895		29.0401	342.101		651	610.827
	1559.16	100.872		29.0601	353.641		651.5	631.281
	1560.13	100.853		29.0801	382.981		652	624.562
	1561.09	100.84		29.1001	366.437		652.5	603.106
	1562.06	100.83		29.1201	363.891		653	610.315
	1563.02	100.824		29.1401	354.784		653.5	626.221
	1563.99	100.819		29.1601	363.104		654	630.938
	1564.95	100.816		29.1801	340.288		654.5	634.091
	1565.91	100.813		29.2001	367.711		655	632.773
	1566.88	100.81		29.2201	354.302		655.5	615.985
	1567.84	100.808		29.2401	328.789		656	608.989
	1568.81	100.806		29.2601	378.989		656.5	629.773
	1569.77	100.805		29.2801	349.669		657	635.702
	1570.74	100.804		29.3001	334.371		657.5	619.566
	1571.7	100.805		29.3201	390.347		658	627.426
	1572.66	100.804		29.3401	333.89		658.5	647.699
	1573.63	100.802		29.3601	337.989		659	642.905
	1574.59	100.796		29.3801	354.19		659.5	626.03
	1575.56	100.786		29.4001	360.83		660	618.388
	1576.52	100.772		29.4201	356.455		660.5	629.338
	1577.49	100.757		29.4401	364.786		661	646.602
	1578.45	100.742		29.4601	358.968		661.5	643.979
	1579.41	100.728		29.4801	343.814		662	628.369
	1580.38	100.717		29.5001	351.721		662.5	616.546
	1581.34	100.706		29.5201	368.56		663	612.26
	1582.31	100.694		29.5401	359.363		663.5	611.931
	1583.27	100.68		29.5601	364.235		664	606.984
	1584.23	100.663		29.5801	351.426		664.5	606.636
	1585.2	100.643		29.6001	350.705		665	623.883
	1586.16	100.621		29.6201	361.138		665.5	637.384
	1587.13	100.597		29.6401	343.972		666	635.676
	1588.09	100.573		29.6601	324.402		666.5	644.114
	1589.06	100.546		29.6801	375.989		667	659.175
	1590.02	100.518		29.7001	380.576		667.5	652.798
	1590.98	100.488		29.7201	351.704		668	636.701
	1591.95	100.455		29.7401	348.233		668.5	630.344
	1592.91	100.42		29.7601	344.863		669	625.551
	1593.88	100.385		29.7801	365.47		669.5	620.541
	1594.84	100.35		29.8001	351.38		670	626.856
	1595.81	100.315		29.8201	356.85		670.5	638.695
	1596.77	100.282		29.8401	357.698		671	642.426
	1597.73	100.247		29.8601	339.699		671.5	640.201
	1598.7	100.211		29.8801	354.568		672	632.048
	1599.66	100.172		29.9001	349.418		672.5	607.194
	1600.63	100.128		29.9201	340.474		673	587.945
	1601.59	100.081		29.9401	371.826		673.5	614.038
	1602.56	100.03		29.9601	393.585		674	636.756
	1603.52	99.975		29.9801	335.959		674.5	612.225
	1604.48	99.9177		30.0001	373.291		675	611.747
	1605.45	99.8593		30.0201	344.266		675.5	649.577
	1606.41	99.8013		30.0401	357.513		676	649.987
	1607.38	99.7452		30.0601	369.793		676.5	626.195
	1608.34	99.6919		30.0801	306.354		677	629.325
	1609.31	99.6416		30.1001	333.699		677.5	633.958
	1610.27	99.5935		30.1201	328.058		678	620.978
	1611.23	99.5463		30.1401	338.425		678.5	618.104
	1612.2	99.4985		30.1601	350.907		679	630.115
	1613.16	99.4492		30.1801	355.525		679.5	640.169
	1614.13	99.3981		30.2001	348.632		680	641.571
	1615.09	99.3461		30.2201	351.905		680.5	632.287
	1616.06	99.295		30.2401	356.848		681	612.039
	1617.02	99.2468		30.2601	373.858		681.5	595.022
	1617.98	99.2036		30.2801	369.449		682	607.007
	1618.95	99.1664		30.3001	377.661		682.5	624.042
	1619.91	99.1355		30.3201	354.852		683	611.363
	1620.88	99.1103		30.3401	312.318		683.5	598.645
	1621.84	99.0899		30.3601	345.447		684	611.322
	1622.81	99.0731		30.3801	362.7		684.5	640.992
	1623.77	99.0586		30.4001	335.624		685	659.393
	1624.73	99.0453		30.4201	311.724		685.5	638.838
	1625.7	99.0327		30.4401	344.819		686	625.105
	1626.66	99.0212		30.4601	341.208		686.5	647.949
	1627.63	99.0118		30.4801	331.63		687	643.857
	1628.59	99.0056		30.5001	364.105		687.5	617.058
	1629.55	99.0032		30.5201	343.708		688	642.126
	1630.52	99.005		30.5401	323.805		688.5	671.953
	1631.48	99.0109		30.5601	314.102		689	639.206
	1632.45	99.0211		30.5801	291.741		689.5	613.074
	1633.41	99.0364		30.6001	305.623		690	630.224
	1634.38	99.0583		30.6201	348.612		690.5	641.355
	1635.34	99.0882		30.6401	367.144		691	638.119
	1636.3	99.1254		30.6601	323.17		691.5	639.177
	1637.27	99.167		30.6801	318.796		692	637.717
	1638.23	99.2086		30.7001	343.575		692.5	631.055
	1639.2	99.247		30.7201	346.472		693	638.72
	1640.16	99.281		30.7401	316.076		693.5	647.682
	1641.12	99.311		30.7601	314.501		694	622.405
	1642.09	99.3384		30.7801	343.327		694.5	595.737
	1643.05	99.3645		30.8001	333.979		695	605.775
	1644.02	99.3908		30.8201	349.643		695.5	624.462
	1644.98	99.4179		30.8401	307.087		696	631.583
	1645.95	99.4456		30.8601	313.729		696.5	631.154
	1646.91	99.4732		30.8801	331.128		697	627.976
	1647.88	99.5002		30.9001	336.148		697.5	626.082
	1648.84	99.527		30.9201	298.738		698	628.153
	1649.8	99.555		30.9401	344.821		698.5	634.245
	1650.77	99.5858		30.9601	350.844		699	640.756
	1651.73	99.6201		30.9801	329.888		699.5	648.036
	1652.7	99.6557		31.0001	308.348		700	657.904
	1653.66	99.6887		31.0201	325.457		700.5	661.704
	1654.62	99.7155		31.0401	330.246		701	653.412
	1655.59	99.7352		31.0601	331.466		701.5	641.188
	1656.55	99.7496		31.0801	362.617		702	636.036
	1657.52	99.7615		31.1001	330.648		702.5	646.402
	1658.48	99.7731		31.1201	331.79		703	653.736
	1659.44	99.786		31.1401	325.703		703.5	639.911
	1660.41	99.8005		31.1601	341.121		704	626.841
	1661.37	99.8159		31.1801	301.029		704.5	630.588
	1662.34	99.831		31.2001	318.939		705	647.704
	1663.3	99.8444		31.2201	322.634		705.5	662.87
	1664.27	99.8555		31.2401	313.302		706	659.994
	1665.23	99.8647		31.2601	311.117		706.5	647.442
	1666.19	99.8732		31.2801	347.719		707	637.523
	1667.16	99.8826		31.3001	316.703		707.5	637.406
	1668.12	99.8942		31.3201	326.298		708	646.493
	1669.09	99.9083		31.3401	309.385		708.5	657.815
	1670.05	99.9243		31.3601	323.432		709	661.684
	1671.02	99.9405		31.3801	303.216		709.5	651.985
	1671.98	99.9548		31.4001	339.544		710	633.779
	1672.94	99.9656		31.4201	300.822		710.5	620.941
	1673.91	99.9724		31.4401	303.368		711	631.633
	1674.87	99.9751		31.4601	300.786		711.5	656.882
	1675.84	99.9745		31.4801	287.855		712	675.253
	1676.8	99.9712		31.5001	315.443		712.5	668.836
	1677.77	99.9661		31.5201	312.561		713	645.331
	1678.73	99.96		31.5401	329.176		713.5	643.434
	1679.69	99.9537		31.5601	318.746		714	663.386
	1680.66	99.9476		31.5801	311.146		714.5	682.121
	1681.62	99.942		31.6001	323.899		715	686.025
	1682.59	99.936		31.6201	298.469		715.5	673.967
	1683.55	99.9286		31.6401	315.351		716	661.839
	1684.52	99.9186		31.6601	320.808		716.5	652.412
	1685.48	99.9056		31.6801	323.87		717	638.913
	1686.44	99.8909		31.7001	342.412		717.5	630.525
	1687.41	99.8766		31.7201	309.322		718	635.523
	1688.37	99.8643		31.7401	309.219		718.5	646.23
	1689.34	99.8547		31.7601	298.445		719	652.971
	1690.3	99.8481		31.7801	313.702		719.5	648.583
	1691.27	99.8439		31.8001	274.606		720	642.902
	1692.23	99.8415		31.8201	302.647		720.5	645.047
	1693.19	99.84		31.8401	293.756		721	637.996
	1694.16	99.8383		31.8601	319.654		721.5	624.774
	1695.12	99.8354		31.8801	321.681		722	636.972
	1696.09	99.8301		31.9001	299.429		722.5	655.978
	1697.05	99.8211		31.9201	298.847		723	646.754
	1698.02	99.8072		31.9401	320.168		723.5	634.156
	1698.98	99.7877		31.9601	306.199		724	638.914
	1699.94	99.7628		31.9801	310.173		724.5	648.883
	1700.91	99.7338		32.0001	287.49		725	653.987
	1701.87	99.7028		32.0201	321.178		725.5	650.646
	1702.84	99.672		32.0401	320.96		726	648.188
	1703.8	99.6429		32.0601	302.907		726.5	650.644
	1704.76	99.6167		32.0801	315.224		727	643.077
	1705.73	99.5939		32.1001	281.243		727.5	632.096
	1706.69	99.5743		32.1201	336.644		728	641.548
	1707.66	99.5577		32.1401	311.4		728.5	657.339
	1708.62	99.5436		32.1601	312.832		729	657.557
	1709.59	99.531		32.1801	322.17		729.5	643.709
	1710.55	99.5193		32.2001	295.009		730	633.885
	1711.51	99.5076		32.2201	315.848		730.5	654.597
	1712.48	99.4949		32.2401	282.203		731	675.066
	1713.44	99.4799		32.2601	259.235		731.5	655.981
	1714.41	99.4608		32.2801	290.293		732	633.939
	1715.37	99.4359		32.3001	298.545		732.5	636.825
	1716.34	99.4051		32.3201	268.175		733	654.793
	1717.3	99.3704		32.3401	306.122		733.5	666.998
	1718.26	99.336		32.3601	312.923		734	655.278
	1719.23	99.3056		32.3801	312.19		734.5	636.777
	1720.19	99.2811		32.4001	306.14		735	632.751
	1721.16	99.2623		32.4201	310.679		735.5	652.045
	1722.12	99.2478		32.4401	295.867		736	671.02
	1723.09	99.2358		32.4601	298.05		736.5	654.659
	1724.05	99.2247		32.4801	320.623		737	644.67
	1725.01	99.2129		32.5001	309.662		737.5	668.232
	1725.98	99.1992		32.5201	287.522		738	663.332
	1726.94	99.1829		32.5401	296.327		738.5	628.975
	1727.91	99.1641		32.5601	274.676		739	625.114
	1728.87	99.1433		32.5801	297.454		739.5	636.613
	1729.83	99.1216		32.6001	303.028		740	634.082
	1730.8	99.1003		32.6201	303.444		740.5	640.617
	1731.76	99.0809		32.6401	315.498		741	656.186
	1732.73	99.0648		32.6601	301.504		741.5	648.402
	1733.69	99.0527		32.6801	273.065		742	641.534
	1734.66	99.0449		32.7001	289.77		742.5	666.25
	1735.62	99.0409		32.7201	316.709		743	670.079
	1736.58	99.0404		32.7401	290.68		743.5	642.399
	1737.55	99.0435		32.7601	287.769		744	650.502
	1738.51	99.0499		32.7801	276.312		744.5	667.199
	1739.48	99.0591		32.8001	319.706		745	631.78
	1740.44	99.0703		32.8201	307.522		745.5	612.79
	1741.4	99.0818		32.8401	308.451		746	648.019
	1742.37	99.0923		32.8601	287.223		746.5	667.142
	1743.33	99.101		32.8801	327.998		747	663.709
	1744.3	99.108		32.9001	329.729		747.5	677.37
	1745.26	99.1145		32.9201	304.555		748	689.842
	1746.23	99.1225		32.9401	297.857		748.5	678.811
	1747.19	99.134		32.9601	259.655		749	653.722
	1748.15	99.1504		32.9801	267.067		749.5	633.975
	1749.12	99.1719		33.0001	275.896		750	638.653
	1750.08	99.1971		33.0201	265.379		750.5	649.986
	1751.05	99.2242		33.0401	276.79		751	647.73
	1752.01	99.2513		33.0601	290.359		751.5	641.08
	1752.98	99.2774		33.0801	274.865		752	636.065
	1753.94	99.3025		33.1001	267.905		752.5	631.497
	1754.9	99.3271		33.1201	296.117		753	633.809
	1755.87	99.3518		33.1401	311.895		753.5	646.114
	1756.83	99.377		33.1601	285.923		754	650.968
	1757.8	99.4031		33.1801	311.967		754.5	647.881
	1758.76	99.4305		33.2001	278.409		755	658.673
	1759.73	99.4591		33.2201	291.794		755.5	670.036
	1760.69	99.4886		33.2401	254.188		756	660.712
	1761.65	99.5186		33.2601	279.077		756.5	653.614
	1762.62	99.5482		33.2801	264.838		757	658.152
	1763.58	99.5767		33.3001	270.707		757.5	651.569
	1764.55	99.6038		33.3201	269.79		758	639.134
	1765.51	99.6297		33.3401	281.757		758.5	638.835
	1766.47	99.6551		33.3601	265.987		759	639.021
	1767.44	99.6815		33.3801	273.469		759.5	631.569
	1768.4	99.7106		33.4001	268.002		760	627.751
	1769.37	99.7435		33.4201	274.835		760.5	636.663
	1770.33	99.7805		33.4401	290.329		761	658.785
	1771.3	99.8198		33.4601	278.464		761.5	666.842
	1772.26	99.8585		33.4801	262.228		762	649.443
	1773.22	99.8935		33.5001	266.855		762.5	642.073
	1774.19	99.9232		33.5201	275.144		763	652.476
	1775.15	99.9481		33.5401	237.74		763.5	660.637
	1776.12	99.97		33.5601	245.635		764	651.388
	1777.08	99.9913		33.5801	301.27		764.5	630.281
	1778.05	100.014		33.6001	271.925		765	643.119
	1779.01	100.038		33.6201	265.301		765.5	678.766
	1779.97	100.066		33.6401	263.392		766	676.009
	1780.94	100.094		33.6601	276.272		766.5	650.843
	1781.9	100.123		33.6801	265.768		767	639.137
	1782.87	100.15		33.7001	262.822		767.5	641.38
	1783.83	100.174		33.7201	258.982		768	648.868
	1784.8	100.194		33.7401	261.753		768.5	650.256
	1785.76	100.21		33.7601	255.72		769	644.216
	1786.72	100.223		33.7801	272.121		769.5	636.213
	1787.69	100.232		33.8001	269.671		770	637.062
	1788.65	100.24		33.8201	267.798		770.5	647.926
	1789.62	100.246		33.8401	288.639		771	657.137
	1790.58	100.252		33.8601	290.316		771.5	658.874
	1791.55	100.26		33.8801	297.554		772	650.94
	1792.51	100.268		33.9001	272.7		772.5	631.441
	1793.47	100.278		33.9201	259.544		773	613.741
	1794.44	100.288		33.9401	257.867		773.5	627.989
	1795.4	100.299		33.9601	268.629		774	656.074
	1796.37	100.309		33.9801	242.847		774.5	660.848
	1797.33	100.319		34.0001	291.908		775	649.766
	1798.3	100.328		34.0201	304.372		775.5	642.56
	1799.26	100.337		34.0401	263.025		776	657.356
	1800.22	100.344		34.0601	251.161		776.5	669.3
	1801.19	100.351		34.0801	256.682		777	643.521
	1802.15	100.357		34.1001	254.04		777.5	630.705
	1803.12	100.362		34.1201	257.963		778	655.46
	1804.08	100.367		34.1401	271.34		778.5	659.116
	1805.05	100.371		34.1601	265.375		779	649.513
	1806.01	100.377		34.1801	274.774		779.5	672.087
	1806.97	100.385		34.2001	265.816		780	679.506
	1807.94	100.393		34.2201	278.438		780.5	646.625
	1808.9	100.403		34.2401	280.224		781	642.89
	1809.87	100.412		34.2601	257.824		781.5	662.68
	1810.83	100.421		34.2801	254.846		782	645.243
	1811.79	100.429		34.3001	254.51		782.5	621.427
	1812.76	100.435		34.3201	267.549		783	628.318
	1813.72	100.44		34.3401	280.85		783.5	647.009
	1814.69	100.444		34.3601	265.351		784	654.851
	1815.65	100.448		34.3801	263.97		784.5	637.79
	1816.62	100.452		34.4001	233.008		785	614.698
	1817.58	100.459		34.4201	256.613		785.5	607.47
	1818.54	100.467		34.4401	262.515		786	616.441
	1819.51	100.477		34.4601	251.653		786.5	641.173
	1820.47	100.49		34.4801	253.503		787	679.293
	1821.44	100.504		34.5001	267.633		787.5	700.521
	1822.4	100.521		34.5201	244.092		788	685.055
	1823.37	100.537		34.5401	254.485		788.5	667.898
	1824.33	100.554		34.5601	255.139		789	660.993
	1825.29	100.568		34.5801	247.438		789.5	646.745
	1826.26	100.58		34.6001	256.331		790	635.567
	1827.22	100.591		34.6201	261.844		790.5	640.946
	1828.19	100.6		34.6401	243.332		791	648.868
	1829.15	100.609		34.6601	263.171		791.5	656.662
	1830.12	100.62		34.6801	262.789		792	676.206
	1831.08	100.633		34.7001	229.766		792.5	689.039
	1832.04	100.648		34.7201	245.933		793	677.304
	1833.01	100.664		34.7401	237.766		793.5	668.702
	1833.97	100.681		34.7601	241.538		794	669.645
	1834.94	100.698		34.7801	239.97		794.5	654.592
	1835.9	100.714		34.8001	244.201		795	632.681
	1836.86	100.729		34.8201	231.785		795.5	625.459
	1837.83	100.745		34.8401	230.59		796	634.317
	1838.79	100.759		34.8601	239.106		796.5	651.698
	1839.76	100.774		34.8801	236.687		797	664.943
	1840.72	100.788		34.9001	254.228		797.5	672.351
	1841.69	100.802		34.9201	248.767		798	676.755
	1842.65	100.817		34.9401	247.693		798.5	675.831
	1843.61	100.832		34.9601	226.773		799	669.342
	1844.58	100.851		34.9801	244.657		799.5	661.82
	1845.54	100.871		35.0001	249.828		800	662.309
	1846.51	100.892		35.0201	231.534		800.5	675.74
	1847.47	100.914		35.0401	231.74		801	684.201
	1848.43	100.934		35.0601	230.781		801.5	681.438
	1849.4	100.953		35.0801	238.168		802	683.179
	1850.36	100.97		35.1001	237.164		802.5	684.891
	1851.33	100.984		35.1201	237.356		803	674.184
	1852.29	100.998		35.1401	272.44		803.5	658.697
	1853.26	101.011		35.1601	241.886		804	648.252
	1854.22	101.023		35.1801	267.099		804.5	648.259
	1855.18	101.035		35.2001	246.764		805	655.085
	1856.15	101.047		35.2201	198.89		805.5	662.992
	1857.11	101.059		35.2401	227.334		806	678.842
	1858.08	101.069		35.2601	238.335		806.5	698.212
	1859.04	101.078		35.2801	247.605		807	697.286
	1860.01	101.087		35.3001	239.782		807.5	677.093
	1860.97	101.094		35.3201	243.041		808	653.997
	1861.93	101.102		35.3401	247.934		808.5	638.065
	1862.9	101.11		35.3601	248.141		809	635.911
	1863.86	101.118		35.3801	240.995		809.5	650.004
	1864.83	101.127		35.4001	246.424		810	666.919
	1865.79	101.135		35.4201	234.987		810.5	671.912
	1866.76	101.144		35.4401	227.478		811	686.208
	1867.72	101.153		35.4601	234.725		811.5	708.124
	1868.68	101.162		35.4801	223.89		812	691.113
	1869.65	101.17		35.5001	234.238		812.5	667.925
	1870.61	101.177		35.5201	262.978		813	696.371
	1871.58	101.183		35.5401	250.771		813.5	706.338
	1872.54	101.188		35.5601	226.932		814	664.276
	1873.51	101.192		35.5801	214.842		814.5	646.713
	1874.47	101.195		35.6001	236.485		815	662.58
	1875.43	101.197		35.6201	221.54		815.5	674.883
	1876.4	101.199		35.6401	232.971		816	676.384
	1877.36	101.201		35.6601	238.55		816.5	670.019
	1878.33	101.204		35.6801	224.955		817	662.211
	1879.29	101.209		35.7001	221.081		817.5	663.785
	1880.26	101.213		35.7201	223.493		818	678.474
	1881.22	101.219		35.7401	248.585		818.5	668.778
	1882.18	101.225		35.7601	219.896		819	635.462
	1883.15	101.232		35.7801	238.612		819.5	651.665
	1884.11	101.239		35.8001	230.839		820	689.666
	1885.08	101.246		35.8201	228.865		820.5	676.182
	1886.04	101.252		35.8401	233.104		821	658.567
	1887.01	101.257		35.8601	240.695		821.5	671.885
	1887.97	101.262		35.8801	224.379		822	679.892
	1888.93	101.266		35.9001	221.88		822.5	674.15
	1889.9	101.269		35.9201	209.654		823	667.989
	1890.86	101.27		35.9401	220.216		823.5	667.811
	1891.83	101.272		35.9601	229.264		824	671.316
	1892.79	101.273		35.9801	227.888		824.5	666.842
	1893.75	101.273		36.0001	257.64		825	661.967
	1894.72	101.273		36.0201	230.222		825.5	671.394
	1895.68	101.273		36.0401	233.752		826	682.605
	1896.65	101.272		36.0601	221.501		826.5	684.272
	1897.61	101.272		36.0801	188.4		827	678.643
	1898.58	101.272		36.1001	237.832		827.5	668.097
	1899.54	101.272		36.1201	199.447		828	657.672
	1900.5	101.274		36.1401	210.136		828.5	665.93
	1901.47	101.278		36.1601	217.152		829	690.296
	1902.43	101.283		36.1801	217.445		829.5	693.847
	1903.4	101.288		36.2001	216.33		830	688
	1904.36	101.294		36.2201	213.631		830.5	702.975
	1905.33	101.299		36.2401	233.871		831	712.108
	1906.29	101.302		36.2601	219.639		831.5	699.357
	1907.25	101.303		36.2801	220.55		832	685.532
	1908.22	101.302		36.3001	210.456		832.5	678.945
	1909.18	101.3		36.3201	234.581		833	679.199
	1910.15	101.297		36.3401	245.549		833.5	690.373
	1911.11	101.294		36.3601	230.984		834	703.304
	1912.08	101.293		36.3801	225.107		834.5	691.702
	1913.04	101.294		36.4001	236.948		835	671.669
	1914	101.295		36.4201	237.859		835.5	670.898
	1914.97	101.297		36.4401	232.329		836	663.491
	1915.93	101.297		36.4601	242.714		836.5	650.585
	1916.9	101.296		36.4801	219.766		837	679.859
	1917.86	101.292		36.5001	243.651		837.5	701.239
	1918.82	101.288		36.5201	221.037		838	652.813
	1919.79	101.283		36.5401	238.137		838.5	636.006
	1920.75	101.281		36.5601	206.72		839	683.722
	1921.72	101.282		36.5801	194.393		839.5	697.791
	1922.68	101.287		36.6001	245.098		840	675.486
	1923.64	101.294		36.6201	217.808		840.5	659.927
	1924.61	101.303		36.6401	204.782		841	655.114
	1925.57	101.312		36.6601	212.167		841.5	660.485
	1926.54	101.32		36.6801	210.478		842	677.718
	1927.5	101.325		36.7001	220.356		842.5	687.848
	1928.47	101.327		36.7201	209.113		843	675.713
	1929.43	101.327		36.7401	236.316		843.5	670.94
	1930.39	101.325		36.7601	225.009		844	677.696
	1931.36	101.323		36.7801	230.729		844.5	665.097
	1932.32	101.321		36.8001	214.104		845	654.378
	1933.29	101.319		36.8201	212.332		845.5	671.882
	1934.25	101.319		36.8401	224.434		846	682.284
	1935.22	101.32		36.8601	230.25		846.5	677.593
	1936.18	101.321		36.8801	217.846		847	687.051
	1937.14	101.323		36.9001	208.611		847.5	689.265
	1938.11	101.324		36.9201	224.522		848	663.512
	1939.07	101.325		36.9401	192.873		848.5	655.306
	1940.04	101.327		36.9601	209.851		849	677.389
	1941	101.329		36.9801	210.681		849.5	696.999
	1941.97	101.332		37.0001	249.771		850	689.056
	1942.93	101.335		37.0201	237.355		850.5	655.154
	1943.89	101.337		37.0401	199.455		851	650.141
	1944.86	101.338		37.0601	224.98		851.5	671.615
	1945.82	101.338		37.0801	220.435		852	665.754
	1946.79	101.336		37.1001	212.365		852.5	662.403
	1947.75	101.332		37.1201	183.66		853	688.642
	1948.71	101.328		37.1401	195.345		853.5	692.087
	1949.68	101.326		37.1601	205.175		854	676.172
	1950.64	101.325		37.1801	211.004		854.5	690.06
	1951.61	101.327		37.2001	202.872		855	694.761
	1952.57	101.331		37.2201	239.475		855.5	667.655
	1953.54	101.337		37.2401	209.061		856	680.863
	1954.5	101.344		37.2601	204.133		856.5	712.871
	1955.46	101.35		37.2801	208.909		857	681.375
	1956.43	101.354		37.3001	206.257		857.5	639.366
	1957.39	101.356		37.3201	202.134		858	642.347
	1958.36	101.357		37.3401	225.793		858.5	666.003
	1959.32	101.355		37.3601	194.851		859	680.955
	1960.29	101.353		37.3801	208.724		859.5	670.957
	1961.25	101.349		37.4001	202.547		860	666.804
	1962.21	101.346		37.4201	214.502		860.5	681.175
	1963.18	101.343		37.4401	209.555		861	676.853
	1964.14	101.341		37.4601	240.087		861.5	677.789
	1965.11	101.341		37.4801	206.399		862	722.186
	1966.07	101.342		37.5001	193.842		862.5	720.55
	1967.04	101.345		37.5201	192.206		863	650.193
	1968	101.349		37.5401	204.083		863.5	630.773
	1968.96	101.354		37.5601	176.269		864	663.91
	1969.93	101.359		37.5801	194.009		864.5	685.152
	1970.89	101.363		37.6001	212.795		865	686.673
	1971.86	101.367		37.6201	197.058		865.5	680.943
	1972.82	101.37		37.6401	214.96		866	686.271
	1973.79	101.373		37.6601	209.211		866.5	685.995
	1974.75	101.375		37.6801	203.032		867	661.674
	1975.71	101.376		37.7001	220.67		867.5	650.605
	1976.68	101.375		37.7201	213.478		868	664.599
	1977.64	101.374		37.7401	178.425		868.5	673.71
	1978.61	101.372		37.7601	217.236		869	670.009
	1979.57	101.37		37.7801	220.353		869.5	660.442
	1980.54	101.368		37.8001	189.241		870	659.445
	1981.5	101.366		37.8201	184.186		870.5	670.446
	1982.46	101.365		37.8401	197.865		871	683.685
	1983.43	101.365		37.8601	200.52		871.5	690.312
	1984.39	101.365		37.8801	217.898		872	686.904
	1985.36	101.363		37.9001	213.634		872.5	681.343
	1986.32	101.361		37.9201	197.359		873	676.708
	1987.29	101.358		37.9401	200.936		873.5	671.348
	1988.25	101.355		37.9601	175.533		874	672.193
	1989.21	101.354		37.9801	193.873		874.5	678.871
	1990.18	101.354		38.0001	207.958		875	670.75
	1991.14	101.357		38.0201	181.393		875.5	661.448
	1992.11	101.361		38.0401	206.574		876	683.573
	1993.07	101.365		38.0601	215.413		876.5	708.388
	1994.03	101.368		38.0801	197.341		877	707.463
	1995	101.368		38.1001	209.248		877.5	689.73
	1995.96	101.367		38.1201	214.04		878	674.195
	1996.93	101.363		38.1401	201.671		878.5	678.057
	1997.89	101.359		38.1601	202.637		879	691.282
	1998.86	101.356		38.1801	204.865		879.5	701.794
	1999.82	101.355		38.2001	224.202		880	706.21
	2000.78	101.355		38.2201	208.963		880.5	701.734
	2001.75	101.358		38.2401	206.953		881	690.269
	2002.71	101.363		38.2601	199.793		881.5	690.912
	2003.68	101.369		38.2801	178.157		882	702.982
	2004.64	101.377		38.3001	186.256		882.5	698.048
	2005.61	101.385		38.3201	178.178		883	687.753
	2006.57	101.393		38.3401	187.159		883.5	693.065
	2007.53	101.4		38.3601	190.346		884	695
	2008.5	101.407		38.3801	197.279		884.5	691.149
	2009.46	101.411		38.4001	204.138		885	701.799
	2010.43	101.414		38.4201	176.788		885.5	702.774
	2011.39	101.414		38.4401	181.828		886	676.82
	2012.36	101.411		38.4601	188.581		886.5	675.777
	2013.32	101.407		38.4801	178.099		887	709.756
	2014.28	101.403		38.5001	200.314		887.5	738.682
	2015.25	101.398		38.5201	198.952		888	731.127
	2016.21	101.393		38.5401	171.308		888.5	692.575
	2017.18	101.389		38.5601	209.14		889	694.506
	2018.14	101.387		38.5801	203.271		889.5	729.332
	2019.1	101.386		38.6001	208.29		890	729.718
	2020.07	101.386		38.6201	178.334		890.5	698.814
	2021.03	101.388		38.6401	179.304		891	668.072
	2022	101.391		38.6601	200.473		891.5	674.947
	2022.96	101.395		38.6801	207.177		892	703.828
	2023.93	101.399		38.7001	194.527		892.5	711.276
	2024.89	101.403		38.7201	201.96		893	695.681
	2025.85	101.404		38.7401	207.346		893.5	673.717
	2026.82	101.404		38.7601	191.421		894	670.196
	2027.78	101.403		38.7801	175.615		894.5	679.468
	2028.75	101.4		38.8001	179.777		895	685.064
	2029.71	101.397		38.8201	182.288		895.5	695.868
	2030.67	101.393		38.8401	184.106		896	712.242
	2031.64	101.39		38.8601	207.539		896.5	718.241
	2032.6	101.388		38.8801	205.869		897	706.284
	2033.57	101.387		38.9001	199.764		897.5	685.261
	2034.53	101.387		38.9201	203.749		898	694.098
	2035.5	101.388		38.9401	179.191		898.5	723.685
	2036.46	101.389		38.9601	182.796		899	721.001
	2037.42	101.392		38.9801	203.038		899.5	704.922
	2038.39	101.395		39.0001	189.831		900	706.336
	2039.35	101.399		39.0201	160.7		900.5	717.842
	2040.32	101.403		39.0401	173.499		901	720.821
	2041.28	101.408		39.0601	191.105		901.5	699.078
	2042.25	101.414		39.0801	200.548		902	675.016
	2043.21	101.419		39.1001	169.512		902.5	671.158
	2044.17	101.424		39.1201	182.262		903	687.045
	2045.14	101.428		39.1401	196.955		903.5	705.955
	2046.1	101.431		39.1601	206.057		904	709.783
	2047.07	101.434		39.1801	202.892		904.5	713.832
	2048.03	101.435		39.2001	184.451		905	725.51
	2049	101.435		39.2201	199.694		905.5	729.872
	2049.96	101.435		39.2401	225.569		906	724.335
	2050.92	101.434		39.2601	214.24		906.5	717.773
	2051.89	101.433		39.2801	199.794		907	728.962
	2052.85	101.432		39.3001	215.314		907.5	740.205
	2053.82	101.432		39.3201	220.376		908	703.784
	2054.78	101.433		39.3401	209.806		908.5	683.404
	2055.74	101.434		39.3601	233.536		909	732.319
	2056.71	101.437		39.3801	211.593		909.5	753.219
	2057.67	101.44		39.4001	211.654		910	720.299
	2058.64	101.443		39.4201	198.221		910.5	691.785
	2059.6	101.446		39.4401	182.488		911	690.729
	2060.57	101.449		39.4601	186.614		911.5	710.998
	2061.53	101.451		39.4801	223.629		912	717.887
	2062.49	101.453		39.5001	214.175		912.5	705.495
	2063.46	101.453		39.5201	222.389		913	690.94
	2064.42	101.452		39.5401	219.471		913.5	683.957
	2065.39	101.451		39.5601	212.401		914	688.502
	2066.35	101.449		39.5801	214.266		914.5	702.432
	2067.32	101.447		39.6001	210.145		915	717.735
	2068.28	101.445		39.6201	229.303		915.5	728.466
	2069.24	101.444		39.6401	226.485		916	745.821
	2070.21	101.443		39.6601	216.508		916.5	761.395
	2071.17	101.443		39.6801	196.211		917	744.6
	2072.14	101.443		39.7001	197.457		917.5	713.086
	2073.1	101.443		39.7201	210.897		918	698.509
	2074.07	101.443		39.7401	223.15		918.5	707.183
	2075.03	101.444		39.7601	215.598		919	719.272
	2075.99	101.445		39.7801	209.066		919.5	704.912
	2076.96	101.446		39.8001	224.192		920	699.511
	2077.92	101.448		39.8201	213.166		920.5	725.21
	2078.89	101.45		39.8401	241.674		921	733.279
	2079.85	101.452		39.8601	246.847		921.5	716.582
	2080.82	101.454		39.8801	217.139		922	703.369
	2081.78	101.456		39.9001	232.159		922.5	707.995
	2082.74	101.457		39.9201	235.839		923	717.969
	2083.71	101.457		39.9401	230.423		923.5	693.432
	2084.67	101.456		39.9601	219.798		924	672.414
	2085.64	101.455		39.9801	250.425		924.5	704.292
	2086.6	101.453		40.0001	231.512		925	721.524
	2087.57	101.452		40.0201	219.068		925.5	702.04
	2088.53	101.45		40.0401	223.959		926	699.864
	2089.49	101.448		40.0601	219.693		926.5	714.301
	2090.46	101.446		40.0801	209.442		927	722.861
	2091.42	101.444		40.1001	207.585		927.5	717.007
	2092.39	101.442		40.1201	204.679		928	712.071
	2093.35	101.441		40.1401	214.564		928.5	731.908
	2094.32	101.441		40.1601	233.617		929	738.197
	2095.28	101.443		40.1801	234.859		929.5	709.67
	2096.24	101.445		40.2001	217.295		930	693.51
	2097.21	101.447		40.2201	203.195		930.5	704
	2098.17	101.45		40.2401	235.527		931	723.349
	2099.14	101.451		40.2601	250.167		931.5	720.556
	2100.1	101.452		40.2801	233.13		932	697.788
	2101.06	101.451		40.3001	208.435		932.5	701.542
	2102.03	101.449		40.3201	216.021		933	719.139
	2102.99	101.448		40.3401	234.324		933.5	718.905
	2103.96	101.446		40.3601	234.922		934	712.037
	2104.92	101.445		40.3801	205.508		934.5	709.753
	2105.89	101.445		40.4001	181.135		935	714.049
	2106.85	101.444		40.4201	201.941		935.5	721.609
	2107.81	101.445		40.4401	211.178		936	728.132
	2108.78	101.445		40.4601	217.07		936.5	731.781
	2109.74	101.446		40.4801	197.735		937	737.51
	2110.71	101.448		40.5001	227.174		937.5	748.572
	2111.67	101.451		40.5201	220.708		938	736.798
	2112.64	101.454		40.5401	223.855		938.5	699.539
	2113.6	101.458		40.5601	246.469		939	685.602
	2114.56	101.461		40.5801	233.624		939.5	696.828
	2115.53	101.463		40.6001	213.914		940	708.003
	2116.49	101.465		40.6201	221.968		940.5	708.773
	2117.46	101.465		40.6401	247.302		941	707.313
	2118.42	101.465		40.6601	228.669		941.5	723.545
	2119.39	101.465		40.6801	233.426		942	730.496
	2120.35	101.465		40.7001	213.132		942.5	708.341
	2121.31	101.466		40.7201	236.8		943	702.162
	2122.28	101.468		40.7401	214.458		943.5	712.819
	2123.24	101.469		40.7601	218.659		944	705.882
	2124.21	101.47		40.7801	228.283		944.5	711.816
	2125.17	101.469		40.8001	213.275		945	742.212
	2126.13	101.467		40.8201	241.911		945.5	743.714
	2127.1	101.464		40.8401	240.475		946	719.08
	2128.06	101.462		40.8601	254.006		946.5	705.29
	2129.03	101.459		40.8801	238.508		947	715.178
	2129.99	101.458		40.9001	244.909		947.5	736.447
	2130.96	101.458		40.9201	241.154		948	736.159
	2131.92	101.459		40.9401	251.834		948.5	713.653
	2132.88	101.461		40.9601	249.108		949	692.695
	2133.85	101.463		40.9801	215.471		949.5	714.814
	2134.81	101.465		41.0001	222.458		950	752.071
	2135.78	101.467		41.0201	208.624		950.5	733.112
	2136.74	101.467		41.0401	230.299		951	710.622
	2137.7	101.466		41.0601	212.257		951.5	725.805
	2138.67	101.463		41.0801	209.603		952	726.474
	2139.63	101.461		41.1001	229.188		952.5	710.736
	2140.6	101.458		41.1201	238.167		953	708.625
	2141.56	101.456		41.1401	233.365		953.5	716.742
	2142.53	101.456		41.1601	212.195		954	728.107
	2143.49	101.457		41.1801	213.234		954.5	740.583
	2144.45	101.461		41.2001	250.154		955	744.538
	2145.42	101.465		41.2201	225.232		955.5	734.861
	2146.38	101.47		41.2401	228.945		956	727.224
	2147.35	101.475		41.2601	236.268		956.5	726.104
	2148.31	101.479		41.2801	218.113		957	723.729
	2149.28	101.482		41.3001	202.866		957.5	719.981
	2150.24	101.484		41.3201	231.147		958	715.855
	2151.2	101.484		41.3401	203.477		958.5	710.469
	2152.17	101.483		41.3601	209.976		959	716.433
	2153.13	101.481		41.3801	211.196		959.5	741.739
	2154.1	101.477		41.4001	202.766		960	744.373
	2155.06	101.472		41.4201	206.322		960.5	716.31
	2156.03	101.467		41.4401	198.34		961	703.377
	2156.99	101.461		41.4601	209.521		961.5	712.356
	2157.95	101.455		41.4801	207.961		962	729.072
	2158.92	101.451		41.5001	192.98		962.5	738.56
	2159.88	101.447		41.5201	237.01		963	744.036
	2160.85	101.445		41.5401	218.649		963.5	758.562
	2161.81	101.445		41.5601	205.993		964	760.436
	2162.78	101.447		41.5801	207.323		964.5	740.74
	2163.74	101.45		41.6001	234.099		965	729.97
	2164.7	101.454		41.6201	212.545		965.5	731.076
	2165.67	101.46		41.6401	239.915		966	731.106
	2166.63	101.466		41.6601	213.402		966.5	731.358
	2167.6	101.471		41.6801	214.376		967	730.829
	2168.56	101.474		41.7001	237.5		967.5	723.171
	2169.53	101.476		41.7201	221.558		968	710.543
	2170.49	101.476		41.7401	223.338		968.5	702.558
	2171.45	101.474		41.7601	216.68		969	715.338
	2172.42	101.47		41.7801	211.847		969.5	737.246
	2173.38	101.466		41.8001	211.561		970	740.497
	2174.35	101.463		41.8201	196.973		970.5	736.008
	2175.31	101.461		41.8401	224.295		971	737.434
	2176.27	101.46		41.8601	198.389		971.5	743.548
	2177.24	101.462		41.8801	214.472		972	744.532
	2178.2	101.464		41.9001	194.69		972.5	732.347
	2179.17	101.466		41.9201	207.002		973	717.671
	2180.13	101.469		41.9401	216.92		973.5	710.938
	2181.1	101.47		41.9601	201.358		974	717.398
	2182.06	101.471		41.9801	207.111		974.5	735.961
	2183.02	101.47		42.0001	222.551		975	752.24
	2183.99	101.468		42.0201	233.74		975.5	733.379
	2184.95	101.464		42.0401	227.217		976	709.005
	2185.92	101.46		42.0601	220.773		976.5	732.857
	2186.88	101.457		42.0801	202.423		977	756.588
	2187.84	101.454		42.1001	191.463		977.5	752.856
	2188.81	101.453		42.1201	215.849		978	755.37
	2189.77	101.454		42.1401	189.408		978.5	758.435
	2190.74	101.457		42.1601	199.563		979	744.961
	2191.7	101.46		42.1801	213.733		979.5	727.24
	2192.67	101.464		42.2001	204.387		980	716.471
	2193.63	101.467		42.2201	208.031		980.5	718.326
	2194.59	101.468		42.2401	216.985		981	739.094
	2195.56	101.467		42.2601	220.036		981.5	762.817
	2196.52	101.465		42.2801	219.24		982	741.157
	2197.49	101.462		42.3001	199.83		982.5	707.354
	2198.45	101.459		42.3201	199.93		983	720.353
	2199.42	101.456		42.3401	195.022		983.5	742.235
	2200.38	101.455		42.3601	198.536		984	751.85
	2201.34	101.456		42.3801	210.669		984.5	767.523
	2202.31	101.459		42.4001	207.912		985	771.16
	2203.27	101.462		42.4201	214.813		985.5	753.358
	2204.24	101.467		42.4401	204.155		986	755.465
	2205.2	101.471		42.4601	199.177		986.5	762.36
	2206.17	101.476		42.4801	193.123		987	733.255
	2207.13	101.479		42.5001	199.411		987.5	731.655
	2208.09	101.482		42.5201	220.708		988	767.01
	2209.06	101.484		42.5401	205.138		988.5	746.607
	2210.02	101.485		42.5601	204.086		989	726.072
	2210.99	101.485		42.5801	210.708		989.5	774.195
	2211.95	101.485		42.6001	208.96		990	782.468
	2212.91	101.484		42.6201	185.958		990.5	739.785
	2213.88	101.484		42.6401	206.335		991	736.659
	2214.84	101.482		42.6601	210.65		991.5	753.843
	2215.81	101.48		42.6801	203.859		992	759.587
	2216.77	101.478		42.7001	179.289		992.5	766.023
	2217.74	101.475		42.7201	196.411		993	774.459
	2218.7	101.473		42.7401	204.092		993.5	778.892
	2219.66	101.469		42.7601	204.074		994	780.475
	2220.63	101.465		42.7801	191.637		994.5	777.387
	2221.59	101.461		42.8001	194.197		995	766.511
	2222.56	101.455		42.8201	191.58		995.5	769.326
	2223.52	101.449		42.8401	217.628		996	792.234
	2224.49	101.444		42.8601	188.351		996.5	792.762
	2225.45	101.439		42.8801	206.313		997	773.942
	2226.41	101.437		42.9001	215.217		997.5	768.157
	2227.38	101.438		42.9201	196.435		998	771.618
	2228.34	101.442		42.9401	170.048		998.5	772.31
	2229.31	101.448		42.9601	173.772		999	762.769
	2230.27	101.456		42.9801	164.152		999.5	761.687
	2231.24	101.463		43.0001	202.23		1000	777.053
	2232.2	101.469		43.0201	204.284		1000.5	764.299
	2233.16	101.471		43.0401	211.344		1001	741.046
	2234.13	101.472		43.0601	193.546		1001.5	763.485
	2235.09	101.469		43.0801	181.703		1002	786.46
	2236.06	101.466		43.1001	202.493		1002.5	778.758
	2237.02	101.462		43.1201	196.242		1003	773.822
	2237.99	101.458		43.1401	178.486		1003.5	773.632
	2238.95	101.454		43.1601	175.039		1004	765.355
	2239.91	101.45		43.1801	188.228		1004.5	752.445
	2240.88	101.445		43.2001	186.474		1005	751.349
	2241.84	101.441		43.2201	192.292		1005.5	778.007
	2242.81	101.437		43.2401	208.763		1006	791.042
	2243.77	101.434		43.2601	201.647		1006.5	769.988
	2244.74	101.432		43.2801	192.89		1007	761.69
	2245.7	101.433		43.3001	192.208		1007.5	776.348
	2246.66	101.436		43.3201	204.482		1008	795.919
	2247.63	101.439		43.3401	190.268		1008.5	799.773
	2248.59	101.444		43.3601	166.71		1009	792.147
	2249.56	101.448		43.3801	177.574		1009.5	796.725
	2250.52	101.452		43.4001	169.339		1010	781.998
	2251.49	101.455		43.4201	189.491		1010.5	740.673
	2252.45	101.458		43.4401	189.297		1011	748.717
	2253.41	101.46		43.4601	194.173		1011.5	781.328
	2254.38	101.461		43.4801	197.618		1012	769.057
	2255.34	101.461		43.5001	203.897		1012.5	761.924
	2256.31	101.46		43.5201	192.404		1013	778.512
	2257.27	101.458		43.5401	197.761		1013.5	774.16
	2258.23	101.454		43.5601	177.703		1014	764.647
	2259.2	101.45		43.5801	202.997		1014.5	772.204
	2260.16	101.446		43.6001	202.421		1015	775.158
	2261.13	101.441		43.6201	201.982		1015.5	777.904
	2262.09	101.438		43.6401	197.846		1016	797.69
	2263.05	101.434		43.6601	179.191		1016.5	805.058
	2264.02	101.431		43.6801	191.224		1017	791.984
	2264.98	101.428		43.7001	187.485		1017.5	790.217
	2265.95	101.425		43.7201	172.119		1018	791.067
	2266.91	101.423		43.7401	170.275		1018.5	777.597
	2267.88	101.421		43.7601	186.311		1019	761.012
	2268.84	101.419		43.7801	176.78		1019.5	753.946
	2269.8	101.418		43.8001	177.62		1020	763.52
	2270.77	101.417		43.8201	177.312		1020.5	782.126
	2271.73	101.417		43.8401	172.877		1021	804.622
	2272.7	101.416		43.8601	185.223		1021.5	830.683
	2273.66	101.416		43.8801	169.548		1022	822.302
	2274.63	101.417		43.9001	185.5		1022.5	764.846
	2275.59	101.419		43.9201	172.132		1023	746.868
	2276.55	101.421		43.9401	172.742		1023.5	775.613
	2277.52	101.423		43.9601	190.503		1024	788.398
	2278.48	101.425		43.9801	197.683		1024.5	795.871
	2279.45	101.427		44.0001	165.559		1025	808.583
	2280.41	101.429		44.0201	182.688		1025.5	806.159
	2281.38	101.43		44.0401	167.386		1026	792.018
	2282.34	101.43		44.0601	187.286		1026.5	782.042
	2283.3	101.43		44.0801	200.549		1027	786.417
	2284.27	101.43		44.1001	184.667		1027.5	794.963
	2285.23	101.43		44.1201	160.836		1028	786.953
	2286.2	101.431		44.1401	168.956		1028.5	776.854
	2287.16	101.432		44.1601	152.665		1029	773.176
	2288.12	101.433		44.1801	169.026		1029.5	761.591
	2289.09	101.435		44.2001	158.882		1030	760.755
	2290.05	101.436		44.2201	173.167		1030.5	786.294
	2291.02	101.437		44.2401	174.614		1031	794.495
	2291.98	101.438		44.2601	169.705		1031.5	780.785
	2292.95	101.438		44.2801	185.685		1032	779.966
	2293.91	101.436		44.3001	170.113		1032.5	791.067
	2294.88	101.433		44.3201	179.704		1033	800.592
	2295.84	101.429		44.3401	185.347		1033.5	795.791
	2296.8	101.423		44.3601	180.731		1034	781.181
	2297.77	101.417		44.3801	201.267		1034.5	773.408
	2298.73	101.41		44.4001	168.615		1035	794.055
	2299.7	101.405		44.4201	178.989		1035.5	821.407
	2300.66	101.402		44.4401	167.642		1036	808.933
	2301.62	101.4		44.4601	176.437		1036.5	797.233
	2302.59	101.399		44.4801	165.781		1037	809.761
	2303.55	101.399		44.5001	174.783		1037.5	803.016
	2304.52	101.4		44.5201	176.992		1038	796.034
	2305.48	101.401		44.5401	171.436		1038.5	817.384
	2306.45	101.401		44.5601	188.104		1039	817.047
	2307.41	101.4		44.5801	171.197		1039.5	794.055
	2308.38	101.399		44.6001	175.045		1040	794.033
	2309.34	101.397		44.6201	184.637		1040.5	796.973
	2310.3	101.395		44.6401	175.925		1041	791.952
	2311.27	101.393		44.6601	163.612		1041.5	810.053
	2312.23	101.391		44.6801	151.113		1042	823.273
	2313.2	101.39		44.7001	173.953		1042.5	799.398
	2314.16	101.391		44.7201	186.558		1043	786.971
	2315.12	101.393		44.7401	165.414		1043.5	796.475
	2316.09	101.397		44.7601	193.096		1044	798.159
	2317.05	101.403		44.7801	175.281		1044.5	801.554
	2318.02	101.409		44.8001	186.339		1045	810.051
	2318.98	101.417		44.8201	141.25		1045.5	802.363
	2319.95	101.425		44.8401	171.36		1046	795.511
	2320.91	101.432		44.8601	165.604		1046.5	807.619
	2321.87	101.438		44.8801	167.113		1047	804.605
	2322.84	101.443		44.9001	189.153		1047.5	792.914
	2323.8	101.446		44.9201	169.925		1048	807.089
	2324.77	101.448		44.9401	171.749		1048.5	808.893
	2325.73	101.449		44.9601	192.654		1049	786.519
	2326.7	101.45		44.9801	176.982		1049.5	792.625
[truncated: 4,801 more rows]

## Sheet: Figure S4
	GO
	1 mg/mL	0	2.09815
	POSS	0.904415	2.17908
		1.80882	1.5698
		2.71323	1.60013
		3.61768	1.65665
		4.52204	1.62359
		5.42651	1.63489
		6.33089	1.67623
		7.2353	1.64563
		8.13972	1.755
		9.04412	1.3768
		9.94854	1.41156
		10.8529	1.26272
		11.7573	1.78182
		12.6618	1.7356
		13.5662	1.74301
		14.4706	1.73101
		15.375	1.73623
		16.2794	1.78204
		17.1838	1.79695
		18.0882	1.77535
		18.9926	1.7347
		19.8971	1.7425
		20.8015	1.75531
		21.7059	1.75469
		22.6103	1.77485
		23.5147	1.76426
		24.4191	1.74856
		25.3236	1.77449
		26.228	1.75543
		27.1324	1.7488
		28.0368	1.74412
		28.9412	1.78182
		29.8456	1.7387
		30.75	1.74153
		31.6544	1.76004
		32.5588	1.73927
		33.4633	1.7445
		34.3677	1.75597
		35.2721	1.7506
		36.1765	1.78398
		37.0809	1.76636
		37.9853	1.76165
		38.8897	1.75778
		39.7941	1.75049
		40.6985	1.74606
		41.6029	1.766
		42.5074	1.75387
		43.4118	1.86702
		44.3162	1.79303
		45.2206	1.76035
		46.125	1.76288
		47.0294	1.73798
		47.9339	1.76758
		48.8383	1.76639
		49.7426	1.76307
		50.6471	1.79687
		51.5515	1.79909
		52.4559	1.77789
		53.3603	1.78497
		54.2647	1.78555
		55.1691	1.79908
		56.0735	1.83831
		56.9779	1.78825
		57.8824	1.78278
		58.7868	1.78268
		59.6912	1.82015
		60.5956	1.81533
		61.5	1.77929
		62.4044	1.79597
		63.3088	1.79303
		64.2132	1.78228
		65.1177	1.78257
		66.0221	1.77212
		66.9265	1.7783
		67.8309	1.77584
		68.7353	1.79821
		69.6397	1.80952
		70.5441	1.79811
		71.4485	1.79299
		72.3529	1.80209
		73.2574	1.79934
		74.1618	1.8111
		75.0662	1.81933
		75.9706	1.86121
		76.875	1.85919
		77.7794	1.8258
		78.6838	1.8289
		79.5883	1.80161
		80.4927	1.81829
		81.3971	1.88139
		82.3015	1.78224
		83.2059	1.81621
		84.1103	1.81574
		85.0147	1.77326
		85.9191	1.79793
		86.8235	1.79507
		87.728	1.81114
		88.6324	1.82608
		89.5368	1.81384
		90.4412	1.82335
		91.3456	1.81547
		92.25	1.82823
		93.1544	1.81514
		94.0589	1.80627
		94.9633	1.84844
		95.8677	1.79336
		96.772	1.80345
		97.6765	1.79611
		98.5809	1.79504
		99.4853	1.80191
		100.39	1.78147
		101.294	1.81087
		102.199	1.87009
		103.103	1.78082
		104.007	1.80008
		104.912	1.82547
		105.816	1.83921
		106.721	1.84483
		107.625	1.81168
		108.529	1.79733
		109.434	1.80124
		110.338	1.81784
		111.243	1.81672
		112.147	1.81833
		113.051	1.80884
		113.956	1.82126
		114.86	1.78945
		115.765	1.80024
		116.669	1.8131
		117.574	1.93489
		118.478	1.81486
		119.382	1.82213
		120.287	1.82065
		121.191	1.85548
		122.096	1.80518
		123	1.7892
		123.904	1.78322
		124.809	1.7906
		125.713	1.82222
		126.618	1.80399
		127.522	1.81123
		128.426	1.86442
		129.331	1.83094
		130.235	1.81849
		131.14	1.82173
		132.044	1.8262
		132.949	1.81546
		133.853	1.82494
		134.757	1.83821
		135.662	1.84945
		136.566	1.84911
		137.471	1.83064
		138.375	1.83606
		139.279	1.89275
		140.184	1.89848
		141.088	1.84129
		141.993	1.83999
		142.897	1.82844
		143.802	1.81782
		144.706	1.84703
		145.61	1.82312
		146.515	1.83192
		147.419	1.84873
		148.324	1.85038
		149.228	1.82366
		150.132	1.84468
		151.037	1.85688
		151.941	1.83541
		152.846	1.82547
		153.75	1.82594
		154.655	1.86338
		155.559	1.8333
		156.463	1.85897
		157.368	1.83949
		158.272	1.86023
		159.176	1.85291
		160.081	1.81836
		160.985	1.8397
		161.89	1.85212
		162.794	1.80262
		163.699	1.83574
		164.603	1.83177
		165.507	1.85787
		166.412	1.84694
		167.316	1.83787
		168.221	1.86016
		169.125	1.85949
		170.029	1.83769
		170.934	1.82399
		171.838	1.8332
		172.743	1.82164
		173.647	1.86851
		174.552	1.84201
		175.456	1.89354
		176.36	1.85709
		177.265	1.82503
		178.169	1.82085
		179.074	1.84555
		179.978	1.85035
		180.882	1.78939
		181.787	1.87019
		182.691	1.84448
		183.596	1.8454
		184.5	1.88757
		185.404	1.77876
		186.309	1.82096
		187.213	1.84868
		188.118	1.8117
		189.022	1.82944
		189.926	1.87216
		190.831	1.85159
		191.735	1.82511
		192.64	1.84845
		193.544	1.83585
		194.449	1.82151
		195.353	1.80846
		196.257	1.84449
		197.162	1.80279
		198.066	1.86716
		198.971	1.86937
		199.875	1.83734
		200.779	1.84035
		201.684	1.81435
		202.588	1.84883
		203.493	1.85796
		204.397	1.86041
		205.301	1.83821
		206.206	1.84799
		207.11	1.88484
		208.015	1.87218
		208.919	1.8713
		209.824	1.84897
		210.728	1.81281
		211.632	1.81382
		212.537	1.83018
		213.441	1.83022
		214.346	1.89137
		215.25	1.87723
		216.154	1.85884
		217.059	1.88481
		217.963	1.81668
		218.868	1.83371
		219.772	1.8842
		220.677	1.85563
		221.581	1.85147
		222.485	1.86357
		223.39	1.8647
		224.294	1.86128
		225.199	1.88277
		226.103	1.82023
		227.007	1.84385
		227.912	1.8743
		228.816	1.85872
		229.721	1.82675
		230.625	1.87709
		231.529	1.84522
		232.434	1.82931
		233.338	1.85176
		234.243	1.85864
		235.147	1.86429
		236.052	1.8735
		236.956	1.85794
		237.86	1.85213
		238.765	1.85318
		239.669	1.84821
		240.574	1.86318
		241.478	1.87285
		242.382	1.89633
		243.287	1.82691
		244.191	1.81993
		245.096	1.86191
		246	1.88163
		246.904	1.84993
		247.809	1.84845
		248.713	1.83084
		249.618	1.81031
		250.522	1.85871
		251.427	1.8659
		252.331	1.85144
		253.235	1.88666
		254.14	1.86182
		255.044	1.82934
		255.949	1.86335
		256.853	1.8682
		257.757	1.8533
		258.662	1.84138
		259.566	1.84386
		260.471	1.86501
		261.375	1.84041
		262.279	1.84915
		263.184	1.85635
		264.088	1.86152
		264.993	1.87957
		265.897	1.90764
		266.801	1.82562
		267.706	1.87901
		268.61	1.88391
		269.515	1.87262
		270.419	1.85917
		271.324	1.87334
		272.228	1.85275
		273.132	1.88227
		274.037	1.87063
		274.941	1.86673
		275.846	1.87344
		276.75	1.90592
		277.654	1.75397
		278.559	1.79688
		279.463	1.86307
		280.368	1.85286
		281.272	1.91784
		282.176	1.87934
		283.081	1.86801
		283.985	1.86128
		284.89	1.91914
		285.794	1.87197
		286.699	1.88085
		287.603	1.8389
		288.507	1.87347
		289.412	1.85651
		290.316	1.85889
		291.221	1.86903
		292.125	1.85849
		293.029	1.85728
		293.934	1.87777
		294.838	1.87481
		295.743	1.86051
		296.647	1.86032
		297.551	1.86496
		298.456	1.88025
		299.36	1.84532
		300.265	1.85905
		301.169	1.85424
		302.074	1.84506
		302.978	1.85499
		303.882	1.86837
		304.787	1.85333
		305.691	1.83976
		306.596	1.88201
		307.5	1.8536
		308.404	1.85228
		309.309	1.86564
		310.213	1.87303
		311.118	1.87259
		312.022	1.87403
		312.926	1.88828
		313.831	1.86012
		314.735	1.86434
		315.64	1.84759
		316.544	1.85125
		317.449	1.87417
		318.353	1.86051
		319.257	1.87469
		320.162	1.87284
		321.066	1.87241
		321.971	1.87834
		322.875	1.89999
		323.779	1.88056
		324.684	1.82808
		325.588	1.89308
		326.493	1.87814
		327.397	1.90242
		328.302	1.86734
		329.206	1.84915
		330.11	1.86803
		331.015	1.85404
		331.919	1.89119
		332.824	1.83257
		333.728	1.88036
		334.632	1.89983
		335.537	1.83556
		336.441	1.87378
		337.346	1.88482
		338.25	1.89395
		339.154	1.84774
		340.059	1.86662
		340.963	1.88533
		341.868	1.85597
		342.772	1.8698
		343.676	1.86073
		344.581	1.89891
		345.485	1.85701
		346.39	1.88123
		347.294	1.86668
		348.199	1.88738
		349.103	1.86542
		350.007	1.86987
		350.912	1.90529
		351.816	1.8512
		352.721	1.87503
		353.625	1.90763
		354.529	1.89006
		355.434	1.91051
		356.338	1.94897
		357.243	1.83563
		358.147	1.86949
		359.051	1.8545
		359.956	1.86673
		360.86	1.89321
		361.765	1.90289
		362.669	1.89164
		363.574	1.89511
		364.478	1.89869
		365.382	1.9387
		366.287	1.89913
		367.191	1.90414
		368.096	1.88269
		369	1.8912
		369.904	1.84442
		370.809	1.87736
		371.713	1.8633
		372.618	1.87314
		373.522	1.87013
		374.426	1.85894
		375.331	1.88476
		376.235	1.87806
		377.14	1.88463
		378.044	1.87991
		378.949	1.89217
		379.853	1.85642
		380.757	1.86386
		381.662	1.88289
		382.566	1.84277
		383.471	1.88283
		384.375	1.85555
		385.279	1.87731
		386.184	1.90648
		387.088	1.84687
		387.993	1.91792
		388.897	1.82787
		389.802	1.8473
		390.706	1.87306
		391.61	1.89598
		392.515	1.8958
		393.419	1.85133
		394.324	1.86614
		395.228	1.86398
		396.132	1.89319
		397.037	1.83817
		397.941	1.86228
		398.846	1.87994
		399.75	1.85931
		400.654	1.89187
		401.559	1.91395
		402.463	1.84654
		403.368	1.8942
		404.272	1.89711
		405.177	1.9025
		406.081	1.82548
		406.985	1.8904
		407.89	1.87866
		408.794	1.89284
		409.699	1.90597
		410.603	1.88638
		411.507	1.88365
		412.412	1.85199
		413.316	1.89845
		414.221	1.87352
		415.125	1.89099
		416.029	1.8712
		416.934	1.89621
		417.838	1.85932
		418.743	1.90009
		419.647	1.90046
		420.552	1.86466
		421.456	1.87016
		422.36	1.85678
		423.265	1.86288
		424.169	1.89456
		425.074	1.8709
		425.978	1.88427
		426.882	1.89093
		427.787	1.84482
		428.691	1.89512
		429.596	1.93442
		430.5	1.8908
		431.404	1.88515
		432.309	1.86984
		433.213	1.87633
		434.118	1.96064
		435.022	1.92076
		435.926	1.8844
		436.831	1.86662
		437.735	1.87411
		438.64	1.86645
		439.544	1.85948
		440.449	1.88076
		441.353	1.88431
		442.257	1.86382
		443.162	1.88117
		444.066	1.95125
		444.971	1.8433
		445.875	1.86674
		446.779	1.87917
		447.684	1.85941
		448.588	1.91461
		449.493	1.91718
		450.397	1.89058
		451.301	1.84175
		452.206	1.85989
		453.11	1.91525
		454.015	1.92337
		454.919	1.86237
		455.824	1.89684
		456.728	1.89413
		457.632	1.86224
		458.537	1.8645
		459.441	1.86591
		460.346	1.90589
		461.25	1.98009
		462.154	1.90947
		463.059	1.90001
		463.963	1.90341
		464.868	1.86826
		465.772	1.87337
		466.677	1.86182
		467.581	1.86362
		468.485	1.88546
		469.39	2.00857
		470.294	1.85199
		471.199	1.86785
		472.103	1.88919
		473.007	1.86874
		473.912	1.89888
		474.816	1.86461
		475.721	1.87206
		476.625	1.88011
		477.529	1.85909
		478.434	1.88914
		479.338	1.91054
		480.243	1.91756
		481.147	1.86343
		482.052	1.90028
		482.956	1.85585
		483.86	1.88826
		484.765	1.87406
		485.669	1.94819
		486.574	1.80312
		487.478	1.86328
		488.382	1.86577
		489.287	1.87599
		490.191	1.89078
		491.096	1.84884
		492	1.88277
		492.905	1.86833
		493.809	1.89253
		494.713	1.87506
		495.618	1.86738
		496.522	1.87854
		497.426	1.88382
		498.331	1.88681
		499.235	1.86543
		500.14	1.90592
		501.044	1.91117
		501.949	1.89483
		502.853	1.87597
		503.757	1.85972
		504.662	1.87726
		505.566	1.86391
		506.471	1.86929
		507.375	1.94899
		508.279	1.84866
		509.184	1.8787
		510.088	1.93698
		510.993	1.8988
		511.897	1.91327
		512.801	1.8535
		513.706	1.87684
		514.61	1.88772
		515.515	1.88052
		516.419	1.90439
		517.324	1.87209
		518.228	1.88243
		519.132	1.89121
		520.037	1.91182
		520.941	1.89033
		521.846	1.89849
		522.75	1.90445
		523.654	1.86734
		524.559	1.89829
		525.463	1.9011
		526.368	1.85816
		527.272	1.86601
		528.176	1.86353
		529.081	1.89003
		529.985	1.88285
		530.89	1.90252
		531.794	1.89597
		532.699	1.94404
		533.603	1.81792
		534.507	1.87316
		535.412	1.86826
		536.316	1.90852
		537.221	1.86728
		538.125	1.88567
		539.029	1.88948
		539.934	1.90483
		540.838	1.88691
		541.743	1.86518
		542.647	1.86552
		543.552	1.89201
		544.456	1.87575
		545.36	1.87118
		546.265	1.85775
		547.169	1.84993
		548.074	1.87966
		548.978	1.91204
		549.882	1.92071
		550.787	1.88626
		551.691	1.89664
		552.596	1.91055
		553.5	1.88636
		554.404	1.87648
		555.309	1.7738
		556.213	1.90927
		557.118	1.87483
		558.022	1.91088
		558.926	1.85351
		559.831	1.87851
		560.735	1.873
		561.64	1.86412
		562.544	1.85204
		563.449	1.87631
		564.353	1.90344
		565.257	1.8841
		566.162	1.87345
		567.066	1.86089
		567.971	1.90451
		568.875	1.9283
		569.779	1.90138
		570.684	1.85929
		571.588	1.86258
		572.493	1.91001
		573.397	1.87536
		574.302	1.89377
		575.206	1.88086
		576.11	1.87293
		577.015	1.86222
		577.919	1.9338
		578.824	1.89991
		579.728	1.87276
		580.632	1.89767
		581.537	1.92413
		582.441	1.87822
		583.346	1.87985
		584.25	1.88644
		585.154	1.87379
		586.059	1.85543
		586.963	1.89999
		587.868	1.873
		588.772	1.8772
		589.677	1.91346
		590.581	1.8609
		591.485	1.87409
		592.39	1.91418
		593.294	1.91158
		594.199	1.91292
		595.103	1.89766
		596.007	1.90709
		596.912	1.90288
		597.816	1.89679
		598.721	1.92084
		599.625	1.85809
		600.529	1.86987
		601.434	1.88528
		602.338	1.88631
		603.243	1.86766
		604.147	1.88389
		605.052	1.8537
		605.956	1.89419
		606.86	1.90452
		607.765	1.89055
		608.669	1.88408
		609.574	1.8537
		610.478	1.87375
		611.382	1.89069
		612.287	1.88231
		613.191	1.88634
		614.096	1.89955
		615	1.95582
		615.904	1.82165
		616.809	1.84004
		617.713	1.90614
		618.618	1.96657
		619.522	1.91824
		620.427	1.89798
		621.331	1.93533
		622.235	1.89167
		623.14	1.94282
		624.044	1.98104
		624.949	1.91072
		625.853	1.89437
		626.757	1.87347
		627.662	1.86788
		628.566	1.87579
		629.471	1.88339
		630.375	1.88982
		631.279	1.88787
		632.184	1.87367
		633.088	1.889
		633.993	1.89293
		634.897	1.8923
		635.802	1.9112
		636.706	1.88842
		637.61	1.8925
		638.515	1.90137
		639.419	1.89087
		640.324	1.91651
		641.228	1.90572
		642.132	1.90263
		643.037	1.88556
		643.941	1.90311
		644.846	1.85905
		645.75	1.90537
		646.654	1.86387
		647.559	1.89356
		648.463	1.89662
		649.368	1.89086
		650.272	1.91319
		651.177	1.88524
		652.081	1.84495
		652.985	1.86717
		653.89	1.93257
		654.794	1.87877
		655.699	1.87405
		656.603	1.89134
		657.507	1.89403
		658.412	1.91592
		659.316	1.91142
		660.221	1.89705
		661.125	1.8776
		662.03	1.92128
		662.934	1.90508
		663.838	1.90509
		664.743	1.92156
		665.647	1.9259
		666.551	1.87433
		667.456	1.88869
		668.36	1.86969
		669.265	1.87256
		670.169	1.87253
		671.074	1.86726
		671.978	1.86588
		672.882	1.84794
		673.787	1.92241
		674.691	1.85866
		675.596	1.89268
		676.5	1.91857
		677.404	1.88753
		678.309	1.8973
		679.213	1.88651
		680.118	1.85015
		681.022	1.93236
		681.926	1.87079
		682.831	1.86078
		683.735	1.89112
		684.64	1.90417
		685.544	1.85803
		686.449	1.88917
		687.353	1.87925
		688.257	1.86906
		689.162	1.90637
		690.066	1.87958
		690.971	1.8809
		691.875	1.88627
		692.779	1.86833
		693.684	1.89679
		694.588	1.89275
		695.493	1.90144
		696.397	1.89408
		697.302	1.88204
		698.206	1.92199
		699.11	1.90622
		700.015	1.81115
		700.919	1.89593
		701.824	1.91089
		702.728	1.87356
		703.632	1.89813
		704.537	1.86233
		705.441	1.88828
		706.346	1.88394
		707.25	1.89745
		708.154	1.90772
		709.059	1.92216
		709.963	1.90984
		710.868	1.87418
		711.772	1.91109
		712.677	1.9292
		713.581	1.87677
		714.485	1.90964
		715.39	1.9019
		716.294	1.90518
		717.199	1.90245
		718.103	1.90669
		719.007	1.90494
		719.912	1.89266
		720.816	1.91245
		721.721	1.91438
		722.625	1.90947
		723.529	1.89984
		724.434	1.90956
		725.338	1.88823
		726.243	1.89475
		727.147	1.92793
		728.051	1.89436
		728.956	1.91406
		729.86	1.90874
		730.765	1.88162
		731.669	1.90877
		732.574	1.88366
		733.478	1.88236
		734.382	1.8974
		735.287	1.89725
		736.191	1.97991
		737.096	1.79409
		738	1.86715
		738.904	1.94558
		739.809	1.90611
		740.713	1.92511
		741.618	1.8914
		742.522	1.87781
		743.427	1.89355
		744.331	1.88353
		745.235	1.92066
		746.14	1.93752
		747.044	1.92004
		747.949	1.93341
		748.853	1.92494
		749.757	1.91709
		750.662	1.90602
		751.566	1.87585
		752.471	1.8674
		753.375	1.90844
		754.279	1.92307
		755.184	1.92111
		756.088	1.91213
		756.993	1.89669
		757.897	1.87842
		758.801	1.86256
		759.706	1.88976
		760.61	1.97195
		761.515	1.91232
		762.419	1.9007
		763.324	1.91801
		764.228	1.98437
		765.132	1.87592
		766.037	1.87581
		766.941	1.90295
		767.846	1.93245
		768.75	1.86847
		769.654	1.86188
		770.559	1.89692
		771.463	1.91679
		772.368	1.88347
		773.272	1.89201
		774.177	1.91515
		775.081	1.87366
		775.985	1.93884
		776.89	1.92139
		777.794	1.95549
		778.699	1.90449
		779.603	1.87907
		780.507	1.94467
		781.412	1.89732
		782.316	1.91482
		783.221	1.91535
		784.125	1.88054
		785.029	1.91345
		785.934	1.88526
		786.838	1.87242
		787.743	1.93318
		788.647	1.91016
		789.552	1.88793
		790.456	1.88646
		791.36	1.92111
		792.265	1.9227
		793.169	1.90324
		794.074	1.9143
		794.978	1.93467
		795.882	1.90403
		796.787	1.91404
		797.691	1.91685
		798.596	1.90257
		799.5	1.92703
		800.404	1.91494
		801.309	1.90338
		802.213	1.91459
		803.118	1.89818
		804.022	1.90391
		804.927	1.92332
		805.831	1.91343
		806.735	1.92289
		807.64	1.95418
		808.544	1.90803
		809.449	1.92128
		810.353	1.91609
		811.257	1.91046
		812.162	1.91798
		813.066	1.89552
		813.971	1.92881
		814.875	1.93292
		815.779	1.87896
		816.684	1.90881
		817.588	1.93808
		818.493	1.88665
		819.397	1.92441
		820.301	1.91699
		821.206	1.90321
		822.11	1.90109
		823.015	1.9128
		823.919	1.93406
		824.824	1.9303
		825.728	1.94586
		826.632	1.93837
		827.537	1.93481
		828.441	1.92544
		829.346	1.92725
		830.25	1.94734
		831.154	1.96054
		832.059	1.95003
		832.963	1.94989
		833.868	1.89555
		834.772	1.92784
		835.677	1.94281
		836.581	1.88641
		837.485	1.90229
		838.39	1.916
		839.294	1.93179
		840.199	1.92102
		841.103	1.92576
		842.007	1.92366
		842.912	1.89375
		843.816	1.90471
		844.721	1.90676
		845.625	1.94468
		846.529	1.89211
		847.434	1.94023
		848.338	1.8936
		849.243	1.9356
		850.147	1.9369
		851.052	1.90814
		851.956	1.9394
		852.86	1.89902
		853.765	1.93278
		854.669	1.91155
		855.574	1.90534
		856.478	1.89106
		857.382	1.9308
		858.287	1.87983
		859.191	1.96835
		860.096	1.9869
		861	1.96974
		861.904	1.93475
		862.809	1.90231
		863.713	1.91238
		864.618	1.93426
		865.522	1.937
		866.427	1.94381
		867.331	1.92424
		868.235	1.90519
		869.14	1.90131
		870.044	1.90935
		870.949	1.91491
		871.853	1.9145
		872.757	1.90208
		873.662	1.92357
		874.566	1.91107
		875.471	1.91197
		876.375	1.92842
		877.279	1.92366
		878.184	1.92918
		879.088	1.93908
		879.993	1.93023
		880.897	1.94328
		881.802	1.90034
		882.706	1.89835
		883.61	1.94418
		884.515	1.93913
		885.419	1.91794
		886.324	1.91597
		887.228	1.89665
		888.132	1.90608
		889.037	1.91595
		889.941	1.9274
		890.846	1.92803
		891.75	1.92691
		892.654	1.92147
		893.559	1.91449
		894.463	1.9112
		895.368	1.91812
		896.272	1.90828
		897.177	1.91859
		898.081	1.91621
		898.985	1.90027
		899.89	1.89366
		900.794	1.92181
		901.699	1.8952
		902.603	1.93882
		903.507	1.91345
		904.412	1.91072
		905.316	1.90969
		906.221	1.92486
		907.125	1.94335
		908.029	1.93791
		908.934	1.92377
		909.838	1.92698
		910.743	1.92473
		911.647	1.92595
		912.552	1.91745
		913.456	1.92969
		914.36	1.90952
		915.265	1.92329
		916.169	1.92269
		917.074	1.92497
		917.978	1.93872
		918.882	1.90094
		919.787	1.90778
		920.691	1.92991
		921.596	1.98544
		922.5	1.88327
		923.404	1.8976
		924.309	1.93117
		925.213	1.95778
		926.118	1.94376
		927.022	1.92336
		927.926	1.96274
		928.831	1.90317
		929.735	1.9078
		930.64	1.94295
		931.544	1.91003
		932.449	1.95234
		933.353	1.95497
		934.257	1.93602
		935.162	1.92845
		936.066	1.94856
		936.971	1.95584
		937.875	1.9831
		938.779	1.93818
		939.684	1.89844
		940.588	1.94029
		941.493	1.90549
		942.397	1.92379
		943.301	1.94705
		944.206	1.96766
		945.11	1.94645
		946.015	1.9313
		946.919	1.92185
		947.824	1.92166
		948.728	1.91682
		949.632	1.95752
		950.537	1.9456
		951.441	1.91458
		952.346	1.91461
		953.25	1.93809
		954.154	1.92553
		955.059	1.88323
		955.963	1.92953
		956.868	1.96284
		957.772	1.92895
		958.677	1.94382
		959.581	1.89266
		960.485	1.9081
		961.39	1.90442
		962.294	1.91973
		963.199	1.94965
		964.103	1.93713
		965.007	1.92152
		965.912	1.89219
		966.816	1.94299
		967.721	1.95929
		968.625	1.96334
		969.529	1.8958
		970.434	1.9322
		971.338	1.90944
		972.243	1.94603
		973.147	1.92581
		974.051	1.91503
		974.956	1.88247
		975.86	1.92094
		976.765	1.95234
		977.669	1.8555
		978.574	1.94545
		979.478	1.94513
		980.382	1.94123
		981.287	1.91466
		982.191	1.88345
		983.096	1.87493
		984	1.85089
		984.904	1.91824
		985.809	1.94405
		986.713	1.90236
		987.618	1.89288
		988.522	1.89467
		989.426	1.97604
		990.331	1.92828
		991.235	1.91027
		992.14	1.91086
		993.044	1.91156
		993.949	1.92585
		994.853	1.90045
		995.757	1.91577
		996.662	1.92624
		997.566	1.94497
		998.471	1.95073
		999.375	1.90923
		1000.28	1.91851
		1001.18	1.95287
		1002.09	1.90734
		1002.99	1.92001
		1003.9	1.94433
		1004.8	1.90035
		1005.71	1.86991
		1006.61	1.91197
		1007.51	1.93371
		1008.42	1.9414
		1009.32	1.90188
		1010.23	1.94006
		1011.13	1.91392
		1012.04	1.92773
		1012.94	1.91851
		1013.85	1.95392
		1014.75	1.93432
		1015.65	1.94871
		1016.56	1.91342
		1017.46	1.94861
		1018.37	1.92795
		1019.27	1.94756
		1020.18	1.9586
		1021.08	1.93651
		1021.99	1.92275
		1022.89	1.93159
		1023.79	1.9086
		1024.7	1.92511
		1025.6	1.92627
		1026.51	1.93579
		1027.41	1.91036
		1028.32	1.90533
		1029.22	1.93481
		1030.13	1.96782
		1031.03	1.91395
		1031.93	1.96078
		1032.84	1.95002
		1033.74	1.94946
		1034.65	1.91277
		1035.55	1.95027
		1036.46	1.98255
		1037.36	1.93095
		1038.26	1.89895
		1039.17	1.93556
		1040.07	1.89337
		1040.98	1.90505
		1041.88	1.90671
		1042.79	1.93694
		1043.69	1.92626
		1044.6	1.90607
		1045.5	1.88741
		1046.4	1.90066
		1047.31	1.88252
		1048.21	1.87523
		1049.12	1.91787
		1050.02	1.94258
		1050.93	1.93302
		1051.83	1.92868
		1052.74	1.92518
		1053.64	1.9015
		1054.54	1.89447
		1055.45	1.91041
		1056.35	1.9305
		1057.26	1.92269
		1058.16	1.92458
		1059.07	1.96341
		1059.97	1.91085
		1060.87	1.88856
		1061.78	1.93933
		1062.68	1.94648
		1063.59	1.9401
		1064.49	1.91941
		1065.4	1.91604
		1066.3	1.9408
		1067.21	1.92887
		1068.11	1.94191
		1069.01	1.94585
		1069.92	1.93936
		1070.82	1.92156
		1071.73	1.98268
		1072.63	1.96038
		1073.54	1.96419
		1074.44	1.95791
		1075.35	1.93199
		1076.25	1.94211
		1077.15	1.98474
		1078.06	1.90099
		1078.96	1.96748
		1079.87	1.9016
		1080.77	1.8994
		1081.68	1.94784
		1082.58	1.92582
		1083.49	1.91753
		1084.39	1.96202
		1085.29	1.94175
		1086.2	1.96748
		1087.1	1.91711
		1088.01	1.94673
		1088.91	1.96701
		1089.82	1.96105
		1090.72	1.99506
		1091.63	1.9591
		1092.53	1.97738
		1093.43	1.92777
		1094.34	1.93604
		1095.24	1.95873
		1096.15	1.90676
		1097.05	1.94386
		1097.96	1.96891
		1098.86	1.93311
		1099.76	2.00377
		1100.67	1.95354
		1101.57	1.96065
		1102.48	1.9039
		1103.38	1.90334
		1104.29	1.87453
		1105.19	1.89445
		1106.1	1.91003
		1107	2.03305
		1107.9	1.77001
		1108.81	1.95065
		1109.71	1.91296
		1110.62	1.94186
		1111.52	1.92329
		1112.43	1.90943
		1113.33	1.95218
		1114.24	1.94918
		1115.14	1.91358
		1116.04	1.94814
		1116.95	1.94885
		1117.85	1.90794
		1118.76	1.94292
		1119.66	1.93859
		1120.57	1.95164
		1121.47	1.93008
		1122.38	1.92726
		1123.28	1.93565
		1124.18	1.8734
		1125.09	1.9404
		1125.99	1.93273
		1126.9	1.92871
		1127.8	1.92837
		1128.71	1.95332
		1129.61	1.95856
		1130.51	1.92905
		1131.42	1.9416
		1132.32	1.92367
		1133.23	1.94816
		1134.13	1.93776
		1135.04	1.9514
		1135.94	1.92523
		1136.85	1.9014
		1137.75	1.96857
		1138.65	1.96071
		1139.56	1.92395
		1140.46	1.95246
		1141.37	1.94815
		1142.27	1.9475
		1143.18	1.95572
		1144.08	1.95081
		1144.99	1.94218
		1145.89	1.95242
		1146.79	1.96176
		1147.7	1.94578
		1148.6	1.95033
		1149.51	1.94455
		1150.41	1.9531
		1151.32	1.92265
		1152.22	1.92715
		1153.13	1.92588
		1154.03	1.96112
		1154.93	1.93934
		1155.84	1.94774
		1156.74	1.93582
		1157.65	1.95214
		1158.55	1.93996
		1159.46	1.9387
		1160.36	1.92096
		1161.26	1.93511
		1162.17	1.92959
		1163.07	1.92177
		1163.98	1.98505
		1164.88	1.95109
		1165.79	1.9119
		1166.69	1.96892

## Sheet: Figure S5
	(a)	GO-CNF			GO-CNF			(b)	1 mg/mL GO:CNF	Without POSS	With POSS
		1 mg/mL			1 mg/mL	0	3.2266		IFT	38.9717	4.48916
		no POSS	0	46.6722	POSS	0.301536	3.17672		error	0.277088	0.221271
			0.904414	46.1314		0.603002	3.19567
			1.80884	47.1327		0.904437	3.20399
			2.71322	44.7208		1.2059	3.18372
			3.61764	48.3246		1.50738	3.20544
			4.52206	42.1066		1.80891	3.22314
			5.42646	52.0758		2.11033	3.20809
			6.3309	45.9606		2.4118	3.24882
			7.2353	46.689		2.71324	3.2107
			8.13967	45.384		3.01476	3.22364
			9.04411	45.6521		3.3162	3.25369
			9.94853	44.4249		3.6177	3.23143
			10.8529	42.2202		3.91916	3.23969
			11.7573	44.2407		4.2206	3.245
			12.6618	43.5682		4.52213	3.21424
			13.5662	46.2825		4.82355	3.22861
			14.4706	44.1963		5.12502	3.20908
			15.375	46.3915		5.42649	3.24698
			16.2794	51.0635		5.72799	3.23359
			17.1838	44.1275		6.02944	3.23479
			18.0882	47.794		6.33093	3.21438
			18.9927	44.8295		6.63239	3.20458
			19.8971	51.2801		6.93385	3.21692
			20.8015	44.0097		7.23531	3.2603
			21.706	50.4826		7.53675	3.2374
			22.6103	43.6473		7.83826	3.22743
			23.5147	53.2884		8.13976	3.22434
			24.4191	46.3731		8.44119	3.21201
			25.3235	49.0552		8.74266	3.23074
			26.2279	45.5062		9.04413	3.21006
			27.1324	47.396		9.34563	3.24596
			28.0367	47.256		9.64714	3.27656
			28.9412	46.0952		9.94855	3.19481
			29.8456	46.0367		10.25	3.15291
			30.75	45.2524		10.5515	3.05588
			31.6544	46.8682		10.853	3.04909
			32.5588	46.9927		11.1544	3.00339
			33.4632	45.6509		11.4559	3.0316
			34.3676	47.1585		11.7574	3.10623
			35.272	45.5535		12.0588	3.20512
			36.1765	45.722		12.3603	3.20911
			37.0809	46.8188		12.6618	3.22527
			37.9853	47.1115		12.9633	3.1497
			38.8897	48.1577		13.2647	3.27603
			39.7941	46.745		13.5662	3.31078
			40.6985	46.5545		13.8677	4.33226
			41.603	46.4488		14.1691	4.28804
			42.5074	45.3575		14.4706	4.33208
			43.4118	47.0647		14.7721	4.39342
			44.3162	48.2208		15.0736	4.40188
			45.221	46.3617		15.375	4.36323
			46.125	47.0021		15.6765	4.39652
			47.0294	47.1244		15.978	4.47261
			47.9339	46.0662		16.2794	4.42456
			48.8382	46.3088		16.5809	4.43223
			49.7426	45.9495		16.8824	4.52829
			50.647	45.6194		17.1839	4.45141
			51.5515	46.0791		17.4853	4.48917
			52.4559	46.3381		17.7868	4.5008
			53.3603	46.0274		18.0883	4.38569
			54.2647	45.7498		18.3897	4.34553
			55.1691	49.6316		18.6912	4.44779
			56.0735	47.8776		18.9927	4.49734
			56.9779	45.0771		19.2942	4.58437
			57.8823	45.918		19.5956	4.61801
			58.7868	47.3301		19.8971	4.4707
			59.6912	46.2805		20.1986	4.35725
			60.5956	44.8509		20.5	4.41528
			61.5	44.4894		20.8015	4.40252
			62.4044	46.1397		21.103	4.45486
			63.3088	46.9632		21.4045	4.42162
			64.2133	46.8264		21.7059	4.52899
			65.1176	47.4058		22.0074	4.44621
			66.0221	46.4717		22.3089	4.52292
			66.9265	46.3437		22.6104	4.4714
			67.8309	47.4771		22.9118	4.48312
			68.7353	45.6904		23.2133	4.43154
			69.6397	45.8976		23.5148	4.42323
			70.5441	44.7487		23.8162	4.42152
			71.4485	46.4737		24.1177	4.30926
			72.353	47.7745		24.4192	4.2823
			73.2574	46.9563		24.7207	4.16765
			74.1618	47.6759		25.0221	4.14612
			75.0662	46.5793		25.3236	4.17941
			75.9706	47.7475		25.625	4.3402
			76.875	45.5343		25.9265	4.35934
			77.7794	46.1952		26.228	4.38178
			78.6838	44.8335		26.5295	4.38174
			79.5883	45.0302		26.8309	4.3214
			80.4927	45.1335		27.1324	4.43804
			81.3971	47.4488		27.4339	4.4678
			82.3015	46.3875		27.7353	4.51648
			83.2059	47.5325		28.0368	4.49007
			84.1103	45.8207		28.3383	4.47442
			85.0147	46.2644		28.6397	4.56251
			85.9191	45.4727		28.9412	4.55091
			86.8235	46.3244		29.2427	4.47861
			87.728	45.7293		29.5441	4.55771
			88.6323	46.4571		29.8456	4.50071
			89.5368	46.0825		30.1471	4.51513
			90.4412	45.7479		30.4486	4.44486
			91.3456	46.7809		30.75	4.51473
			92.25	51.9695		31.0515	4.4207
			93.1544	49.9049		31.353	4.46639
			94.0588	47.2323		31.6545	4.36914
			94.9632	46.4523		31.9559	4.36858
			95.8677	45.7377		32.2574	4.38226
			96.7721	46.4965		32.5589	4.36042
			97.6765	47.7821		32.8603	4.38371
			98.5809	45.8244		33.1618	4.47622
			99.4853	46.0981		33.4633	4.43076
			100.39	47.6986		33.7647	4.43273
			101.294	47.6126		34.0662	4.36485
			102.199	48.1722		34.3677	4.39504
			103.103	45.6471		34.6691	4.47185
			104.007	46.0063		34.9706	4.51025
			104.912	44.6596		35.2721	4.54189
			105.816	44.6177		35.5736	#VALUE!
			106.721	45.605		35.875	4.63161
			107.625	45.5241		36.1765	4.58766
			108.529	46.3468		36.478	4.5862
			109.434	46.2764		36.7794	4.69815
			110.338	44.6323		37.0809	4.70598
			111.243	44.7461		37.3824	4.01026
			112.147	48.5768		37.6839	3.95537
			113.052	48.7907		37.9853	4.63453
			113.956	46.0296		38.2868	4.54392
			114.86	44.4687		38.5883	4.42207
			115.765	45.8779		38.8898	4.48778
			116.669	46.3958		39.1912	4.40804
			117.574	45.2538		39.4927	4.52268
			118.478	46.2321		39.7941	4.50936
			119.382	45.7917		40.0956	4.42518
			120.287	45.7309		40.3971	4.53124
			121.191	46.9951		40.6986	4.49406
			122.096	46.7683		41	4.52034
			123	45.2272		41.3015	4.54335
			123.904	45.3109		41.603	4.52548
			124.809	45.6019		41.9045	4.52676
			125.713	45.0339		42.2059	4.49064
			126.618	44.34		42.5074	4.45883
			127.522	44.485		42.8089	4.5456
			128.426	43.1126		43.1104	4.46511
			129.331	42.5069		43.4118	4.47435
			130.235	43.4329		43.7133	4.49422
			131.14	43.7206		44.0148	4.3755
			132.044	45.035		44.3162	4.43008
			132.949	44.9185		44.6177	4.48404
			133.853	44.0185		44.9192	4.44221
			134.757	45.0458		45.2207	4.43768
			135.662	45.3879		45.5221	4.49965
			136.566	45.1036		45.8236	4.51718
			137.471	45.9959		46.1251	4.60655
			138.375	45.892		46.4265	4.50227
			139.279	45.6526		46.728	4.49595
			140.184	46.3319		47.0295	4.51187
			141.088	45.2216		47.3309	4.45445
			141.993	45.7527		47.6324	4.4104
			142.897	45.1004		47.9339	4.50921
			143.802	46.5448		48.2354	4.66554
			144.706	46.9871		48.5369	4.60955
			145.61	44.9668		48.8382	4.52288
			146.515	44.5037		49.1398	4.52326
			147.419	45.8784		49.4412	4.58478
			148.324	44.7714		49.7427	4.50151
			149.228	44.7798		50.0442	4.50246
			150.132	45.2048		50.3456	4.53846
			151.037	44.846		50.6472	4.49238
			151.941	45.57		50.9486	4.51715
			152.846	46.5704		51.25	4.49904
			153.75	44.7649		51.5515	4.53583
			154.654	45.2509		51.853	4.53522
			155.559	44.1867		52.1544	4.6501
			156.463	45.0375		52.4559	4.52764
			157.368	45.7503		52.7574	4.55823
			158.272	44.7448		53.0589	4.56114
			159.177	44.7427		53.3603	4.60044
			160.081	44.679		53.6618	4.47874
			160.985	44.2017		53.9633	4.48631
			161.89	44.3565		54.2648	4.54083
			162.794	44.6541		54.5662	4.6117
			163.699	44.61		54.8677	4.61345
			164.603	46.017		55.1692	4.65838
			165.507	45.4542		55.4706	4.69905
			166.412	44.8908		55.7721	4.68934
			167.316	44.9517		56.0736	4.75433
			168.221	45.2262		56.3751	4.74111
			169.125	43.408		56.6765	4.64194
			170.029	43.3152		56.978	4.51504
			170.934	43.4205		57.2795	4.57076
			171.838	43.8634		57.581	4.30374
			172.743	42.7726		57.8824	4.35655
			173.647	44.3328		58.1839	4.33947
			174.551	43.0368		58.4853	4.43829
			175.456	44.1609		58.7868	4.48046
			176.36	44.9353		59.0883	4.5966
			177.265	44.526		59.3898	4.51053
			178.169	44.3521		59.6912	4.58484
			179.074	44.6517		59.9927	4.54686
			179.978	44.7329		60.2942	4.54251
			180.882	43.8975		60.5956	4.56756
			181.787	44.0336		60.8971	4.91777
			182.691	45.2087		61.1986	4.63881
			183.596	45.0591		61.5001	4.55993
			184.5	45.047		61.8015	4.57196
			185.404	45.8474		62.1031	4.68189
			186.309	45.6027		62.4045	4.6515
			187.213	45.1475		62.706	4.51916
			188.118	44.3972		63.0074	4.5619
			189.022	43.7447		63.3089	4.53986
			189.926	44.2099		63.6103	4.56129
			190.831	44.8081		63.9118	4.47085
			191.735	44.1771		64.2133	4.52002
			192.64	44.5543		64.5148	4.49339
			193.544	44.8767		64.8162	4.48456
			194.449	44.3094		65.1177	4.56011
			195.353	44.9297		65.4192	4.53467
			196.257	43.8338		65.7207	4.53908
			197.162	42.0134		66.0221	4.48183
			198.066	42.5778		66.3237	4.49651
			198.971	45.0324		66.625	4.54035
			199.875	44.0238		66.9265	4.5888
			200.779	45.2494		67.2281	4.58629
			201.684	45.1257		67.5295	4.65267
			202.588	45.4303		67.831	4.63612
			203.493	47.1064		68.1324	4.59527
			204.397	45.6721		68.4339	4.5819
			205.301	45.2178		68.7353	4.54229
			206.206	44.6043		69.0369	4.53418
			207.11	43.5953		69.3383	4.481
			208.015	43.5094		69.6398	4.40166
			208.919	42.8032		69.9412	4.51346
			209.824	44.2517		70.2427	4.50196
			210.728	44.0032		70.5442	4.60745
			211.632	43.063		70.8457	4.52488
			212.537	42.8314		71.1471	4.54041
			213.441	42.5547		71.4486	4.5566
			214.346	44.4702		71.7501	4.61232
			215.25	43.5036		72.0515	4.65611
			216.154	44.6316		72.353	4.6428
			217.059	44.4207		72.6545	4.64856
			217.963	45.2068		72.956	4.55205
			218.868	44.0547		73.2574	4.53357
			219.772	44.1806		73.5589	4.54257
			220.676	44.5249		73.8604	4.55221
			221.581	43.8781		74.1618	4.61066
			222.485	44.2486		74.4633	4.57423
			223.39	43.6072		74.7648	4.50342
			224.294	42.2685		75.0662	4.57298
			225.199	43.8171		75.3677	4.56984
			226.103	44.671		75.6692	4.50046
			227.007	44.2293		75.9707	4.45868
			227.912	45.4523		76.2721	4.49389
			228.816	44.9383		76.5736	4.53095
			229.721	43.1227		76.875	4.56089
			230.625	43.9896		77.1765	4.6705
			231.529	44.1912		77.4781	4.60133
			232.434	43.7342		77.7795	4.63655
			233.338	43.6575		78.0809	4.55234
			234.243	43.6037		78.3824	4.50914
			235.147	43.488		78.6839	4.68997
			236.051	43.2934		78.9853	4.57063
			236.956	44.0012		79.2868	4.66284
			237.86	43.6028		79.5883	4.60138
			238.765	44.0243		79.8898	4.48928
			239.669	43.8223		80.1913	4.61471
			240.574	43.2499		80.4927	4.59823
			241.478	43.7542		80.7942	4.63393
			242.382	43.8594		81.0956	4.65953
			243.287	44.5044		81.3971	4.49217
			244.191	43.8374		81.6986	4.50365
			245.096	43.9317		82	4.50644
			246	44.1469		82.3016	4.40776
			246.904	43.5429		82.603	4.52077
			247.809	44.15		82.9045	4.55474
			248.713	45.3366		83.206	4.60594
			249.618	46.6585		83.5074	4.6946
			250.522	46.8982		83.8089	4.63951
			251.427	44.0845		84.1104	4.57365
			252.331	43.1239		84.4118	4.73359
			253.235	44.8121		84.7133	4.62166
			254.14	44.042		85.0147	4.65493
			255.044	44.2938		85.3162	4.5344
			255.949	44.1933		85.6177	4.54935
			256.853	43.5526		85.9192	4.74801
			257.757	43.1041		86.2206	4.9553
			258.662	43.727		86.5222	5.80113
			259.566	43.1612		86.8236	3.94201
			260.471	42.5547		87.1251	3.80797
			261.375	44.4479		87.4265	4.10587
			262.28	44.204		87.728	4.29326
			263.184	44.4488		88.0295	4.2126
			264.088	45.0559		88.331	4.13582
			264.993	43.7775		88.6324	4.22953
			265.897	44.2287		88.9339	4.22531
			266.801	43.5961		89.2354	4.17034
			267.706	44.3509		89.5368	4.24456
			268.61	45.0819		89.8383	4.25206
			269.515	43.5392		90.1398	4.15505
			270.419	43.6222		90.4412	4.19608
			271.324	43.2373		90.7427	4.176
			272.228	42.825		91.0442	4.21705
			273.132	42.4783		91.3457	4.37811
			274.037	42.7149		91.6472	4.49976
			274.941	42.8068		91.9487	4.54839
			275.846	42.8859		92.2501	4.69815
			276.75	42.3212		92.5516	4.78096
			277.654	42.9639		92.853	4.68135
			278.559	42.7333		93.1545	4.57981
			279.463	42.6122		93.456	4.56041
			280.368	42.8431		93.7574	4.48919
			281.272	42.3927		94.0589	4.51802
			282.177	43.0183		94.3604	4.4119
			283.081	42.6882		94.6619	4.48334
			283.985	42.6002		94.9633	4.47389
			284.89	41.9209		95.2648	4.4169
			285.794	42.2938		95.5663	4.48723
			286.699	43.3013		95.8677	4.52707
			287.603	42.9231		96.1693	4.54373
			288.507	43.1682		96.4707	4.60181
			289.412	42.5821		96.7721	4.596
			290.316	42.7827		97.0736	4.57283
			291.221	42.2574		97.3751	4.42301
			292.125	42.5156		97.6765	4.24495
			293.029	42.4314		97.978	4.25861
			293.934	42.4582		98.2795	4.60457
			294.838	42.2172		98.581	4.81494
			295.743	42.2797		98.8825	4.56125
			296.647	42.0826		99.1839	4.51213
			297.552	42.5207		99.4853	4.57356
			298.456	41.6176		99.7868	4.61203
			299.36	41.2723		100.088	4.58107
			300.265	41.4948		100.39	4.57817
			301.169	42.3425		100.691	4.63573
			302.074	41.8518		100.993	4.64724
			302.978	40.1127		101.294	4.60407
			303.882	41.6515		101.596	4.58169
			304.787	41.7259		101.897	4.55973
			305.691	42.5413		102.199	4.56796
			306.596	41.7698		102.5	4.47348
			307.5	42.5588		102.802	4.58465
			308.404	41.9046		103.103	4.63931
			309.309	42.2791		103.404	4.57603
			310.213	42.1768		103.706	4.67179
			311.118	41.8909		104.007	4.65068
			312.022	41.8798		104.309	4.54618
			312.927	41.8725		104.61	4.59846
			313.831	41.3875		104.912	4.54416
			314.735	41.2019		105.213	4.5585
			315.64	41.6678		105.515	4.54129
			316.544	41.7505		105.816	4.56025
			317.449	42.208		106.118	4.68433
			318.353	42.0546		106.419	4.58971
			319.257	41.9714		106.721	4.56862
			320.162	42.7432		107.022	4.55826
			321.066	41.9757		107.324	4.42507
			321.971	40.563		107.625	4.46864
			322.875	41.2114		107.927	4.36528
			323.779	41.4516		108.228	4.38683
			324.684	41.9169		108.53	4.40584
			325.588	41.5507		108.831	4.50399
			326.493	41.0832		109.132	4.46921
			327.397	41.5013		109.434	4.48121
			328.301	42.1654		109.735	4.45322
			329.206	41.5435		110.037	4.49847
			330.11	41.7593		110.338	4.33685
			331.015	42.0597		110.64	4.27885
			331.919	41.482		110.941	4.36637
			332.824	42.1421		111.243	4.51311
			333.728	41.6302		111.544	4.50069
			334.632	41.821		111.846	4.44069
			335.537	42.4849		112.147	4.47539
			336.441	42.6137		112.449	4.47582
			337.346	41.6658		112.75	4.5683
			338.25	41.522		113.052	4.52593
			339.154	41.6364		113.353	4.91614
			340.059	40.8864		113.655	4.51704
			340.963	40.9592		113.956	4.49963
			341.868	41.9728		114.257	4.48621
			342.772	42.5539		114.559	4.56523
			343.677	42.1597		114.86	4.61158
			344.581	43.9869		115.162	4.67511
			345.485	42.9907		115.463	4.64285
			346.39	41.5282		115.765	4.68276
			347.294	41.5554		116.066	8.33247
			348.199	40.7536		116.368	4.76572
			349.103	40.9555		116.669	4.52279
			350.007	41.3323		116.971	4.60879
			350.912	40.6154		117.272	4.54602
			351.816	40.5701		117.574	4.51103
			352.721	41.2831		117.875	4.56237
			353.625	41.0247		118.177	4.64164
			354.529	40.9609		118.478	4.68826
			355.434	40.9714		118.779	4.64564
			356.338	41.0349		119.081	4.69023
			357.243	41.2156		119.382	4.68804
			358.147	41.1547		119.684	4.75097
			359.051	40.6832		119.985	4.67545
			359.956	40.5932		120.287	4.63821
			360.86	40.1177		120.588	4.66815
			361.765	40.3489		120.89	4.73782
			362.669	40.9583		121.191	4.68968
			363.574	40.6579		121.493	4.74934
			364.478	40.5978		121.794	4.65766
			365.382	41.0054		122.096	4.54937
			366.287	40.5991		122.397	4.35969
			367.191	40.5768		122.699	4.35797
			368.096	40.7192		123	4.40479
			369	40.8245		123.302	4.58234
			369.904	40.5945		123.603	4.73267
			370.809	40.5652		123.905	4.66673
			371.713	40.92		124.206	4.6008
			372.618	40.8199		124.507	4.57299
			373.522	40.2285		124.809	4.54394
			374.427	41.0795		125.11	4.5175
			375.331	40.9311		125.412	4.56501
			376.235	41.4227		125.713	4.49892
			377.14	40.7689		126.015	4.50061
			378.044	39.7745		126.316	4.58702
			378.949	40.0948		126.618	4.66502
			379.853	40.1788		126.919	4.64157
			380.757	40.4415		127.221	4.6386
			381.662	40.4574		127.522	4.62452
			382.566	40.6228		127.824	4.76858
			383.471	40.5729		128.125	4.72596
			384.375	40.4661		128.427	4.73709
			385.279	40.7341		128.728	4.88189
			386.184	41.2228		129.03	4.86616
			387.088	40.428		129.331	4.6691
			387.993	40.6034		129.632	4.28786
			388.897	40.9862		129.934	4.37716
			389.802	40.854		130.235	4.3967
			390.706	40.287		130.537	4.59787
			391.61	40.5637		130.838	4.58871
			392.515	40.6635		131.14	4.69882
			393.419	40.6217		131.441	4.74269
			394.324	40.6434		131.743	4.71713
			395.228	40.4815		132.044	4.63086
			396.132	40.3006		132.346	4.5008
			397.037	40.0684		132.647	4.42043
			397.941	40.1195		132.949	4.35295
			398.846	40.6349		133.25	4.43209
			399.75	40.6642		133.552	4.49177
			400.654	40.0073		133.853	4.57604
			401.559	40.3886		134.155	4.6931
			402.463	40.5714		134.456	4.54429
			403.368	41.019		134.757	4.33298
			404.272	41.1832		135.059	3.87192
			405.177	40.5949		135.36	3.82449
			406.081	40.463		135.662	4.04275
			406.985	40.3654		135.963	4.61029
			407.89	40.1955		136.265	5.06246
			408.794	40.3232		136.566	4.79405
			409.699	39.8801		136.868	4.44313
			410.603	40.0103		137.169	4.51935
			411.507	39.9018		137.471	4.64327
			412.412	39.9625		137.772	4.70562
			413.316	40.1182		138.074	4.64263
			414.221	39.7388		138.375	4.68858
			415.125	40.0028		138.677	4.61823
			416.029	39.9906		138.978	4.66168
			416.934	39.7963		139.28	4.57969
			417.838	39.8113		139.581	4.59538
			418.743	39.5063		139.882	4.57361
			419.647	40.0191		140.184	4.61091
			420.552	40.2566		140.485	4.48748
			421.456	40.425		140.787	4.48117
			422.36	40.8148		141.088	4.46493
			423.265	40.321		141.39	4.32629
			424.169	40.5512		141.691	4.28219
			425.074	40.6281		141.993	4.40435
			425.978	40.1454		142.294	4.67185
			426.882	40.0593		142.596	4.70025
			427.787	39.9218		142.897	4.70662
			428.691	40.1032		143.199	4.70229
			429.596	39.9519		143.5	4.70064
			430.5	40.2473		143.802	4.75772
			431.404	40.4814		144.103	4.66907
			432.309	40.4065		144.405	4.56716
			433.213	39.9073		144.706	4.59635
			434.118	39.3616		145.007	4.5642
			435.022	40.4565		145.309	4.55758
			435.927	40.5573		145.61	4.55361
			436.831	39.9841		145.912	4.57247
			437.735	39.7351		146.213	4.61534
			438.64	39.4068		146.515	4.6118
			439.544	39.4733		146.816	4.58832
			440.449	39.6596		147.118	4.58755
			441.353	39.3461		147.419	4.56805
			442.257	39.5433		147.721	4.50824
			443.162	39.6429		148.022	4.5484
			444.066	39.3095		148.324	4.69169
			444.971	39.6337		148.625	4.63231
			445.875	39.2756		148.927	4.52877
			446.779	39.2351		149.228	4.56084
			447.684	39.213		149.53	4.44009
			448.588	39.2284		149.831	4.49537
			449.493	39.0894		150.132	4.42886
			450.397	39.4319		150.434	4.52417
			451.302	39.1038		150.735	4.54772
			452.206	39.2881		151.037	4.55666
			453.11	39.084		151.338	4.58044
			454.015	39.4385		151.64	4.5477
			454.919	39.5223		151.941	4.67586
			455.824	39.468		152.243	4.58768
			456.728	39.3261		152.544	4.51912
			457.632	39.7697		152.846	4.59413
			458.537	39.6329		153.147	4.56431
			459.441	39.8571		153.449	4.518
			460.346	39.5204		153.75	4.53142
			461.25	39.565		154.052	4.53122
			462.154	39.2908		154.353	4.59253
			463.059	39.6947		154.654	4.48242
			463.963	39.3687		154.956	4.50894
			464.868	39.7098		155.257	4.51463
			465.772	39.3446		155.559	4.56108
			466.677	39.5491		155.86	4.62061
			467.581	39.3277		156.162	4.52716
			468.485	39.6293		156.463	4.58657
			469.39	39.144		156.765	4.54668
			470.294	39.5937		157.066	4.52256
			471.199	39.4324		157.368	4.4898
			472.103	39.5519		157.669	4.52596
			473.007	39.5993		157.971	4.71828
			473.912	39.4002		158.272	4.57014
			474.816	39.5153		158.574	4.56315
			475.721	39.4742		158.875	4.6678
			476.625	39.5765		159.177	4.62345
			477.529	39.4907		159.478	4.69502
			478.434	39.5116		159.78	4.68081
			479.338	39.4945		160.081	4.56865
			480.243	39.7452		160.382	4.581
			481.147	39.4276		160.684	4.57389
			482.052	39.7096		160.985	4.53185
			482.956	39.5974		161.287	4.64481
			483.86	39.4882		161.588	4.5439
			484.765	39.2992		161.89	4.54578
			485.669	39.2205		162.191	4.42001
			486.574	39.3055		162.493	4.57204
			487.478	39.0976		162.794	4.6007
			488.382	39.6839		163.096	4.64279
			489.287	39.1682		163.397	4.59339
			490.191	39.4372		163.699	4.65664
			491.096	39.5256		164	4.57334
			492	39.2457		164.302	4.55459
			492.904	38.9362		164.603	4.52651
			493.809	39.2164		164.905	4.64314
			494.713	39.0835		165.206	4.60345
			495.618	39.647		165.507	4.68275
			496.522	39.688		165.809	4.68225
			497.427	39.5239		166.11	4.70614
			498.331	39.4828		166.412	4.67629
			499.235	39.2677		166.713	4.61635
			500.14	39.3176		167.015	4.59606
			501.044	39.2158		167.316	4.58395
			501.949	39.1234		167.618	4.53745
			502.853	39.3478		167.919	4.53449
			503.757	38.8542		168.221	4.58473
			504.662	38.7517		168.522	4.60128
			505.566	39.0899		168.824	4.57044
			506.471	39.1261		169.125	4.5886
			507.375	39.3354		169.427	4.56271
			508.279	39.2446		169.728	4.67178
			509.184	39.1485		170.03	4.64934
			510.088	39.1687		170.331	4.64571
			510.993	39.1445		170.632	4.57138
			511.897	39.0967		170.934	4.6807
			512.801	39.3043		171.235	4.6182
			513.706	39.2922		171.537	4.58284
			514.61	39.0861		171.838	4.57214
			515.515	39.3964		172.14	4.54602
			516.419	39.3182		172.441	4.5308
			517.324	39.2444		172.743	4.35377
			518.228	39.0556		173.044	4.47648
			519.132	38.8993		173.346	4.70028
			520.037	38.939		173.647	4.58268
			520.941	38.9477		173.949	4.53515
			521.846	39.1734		174.25	4.70567
			522.75	39.0582		174.552	4.72833
			523.655	38.8617		174.853	4.59983
			524.559	38.7767		175.154	4.5774
			525.463	38.7625		175.456	4.37704
			526.368	38.8365		175.757	4.41166
			527.272	38.7291		176.059	4.40042
			528.177	38.8053		176.36	4.46726
			529.081	38.8592		176.662	4.45298
			529.985	38.905		176.963	4.49009
			530.89	38.8101		177.265	4.54941
			531.794	38.8853		177.566	4.56786
			532.699	38.8107		177.868	4.58832
			533.603	38.8607		178.169	4.64511
			534.507	38.5281		178.471	4.66728
			535.412	38.4958		178.772	4.62642
			536.316	38.6973		179.074	4.5643
			537.221	38.7468		179.375	4.53166
			538.125	38.8662		179.677	4.67412
			539.029	38.8286		179.978	4.67027
			539.934	38.3688		180.279	4.75103
			540.838	38.6232		180.581	4.6872
			541.743	38.8535		180.882	4.71346
			542.647	38.6902		181.184	4.74222
			543.552	38.6378		181.485	4.76697
			544.456	38.692		181.787	4.62116
			545.36	38.6566		182.088	4.32469
			546.265	38.5953		182.39	4.24143
			547.169	38.0825		182.691	4.28195
			548.074	38.1413		182.993	4.52344
			548.978	38.1188		183.294	4.64334
			549.882	38.3823		183.596	4.56198
			550.787	38.2869		183.897	4.52167
			551.691	38.3974		184.199	4.61761
			552.596	38.4123		184.5	4.56943
			553.5	38.2588		184.802	4.71724
			554.404	38.2684		185.103	4.46013
			555.309	38.1809		185.405	4.44994
			556.213	38.3076		185.706	4.48183
			557.118	38.1923		186.007	4.42623
			558.022	38.2564		186.309	4.44476
			558.927	38.5073		186.61	4.4309
			559.831	38.5548		186.912	4.51013
			560.735	38.7718		187.213	4.48718
			561.64	38.4625		187.515	4.44925
			562.544	38.2733		187.816	4.57275
			563.449	38.5207		188.118	4.46217
			564.353	38.4944		188.419	4.43001
			565.257	38.8651		188.721	4.60082
			566.162	38.8175		189.022	4.59989
			567.066	38.6809		189.324	4.59616
			567.971	38.5937		189.625	4.60752
			568.875	38.3601		189.927	4.64157
			569.779	38.1863		190.228	4.61208
			570.684	38.1608		190.53	4.49978
			571.588	38.0376		190.831	4.54214
			572.493	38.1679		191.132	4.45716
			573.397	38.0841		191.434	4.52577
			574.302	38.3418		191.735	4.5357
			575.206	38.448		192.037	4.53812
			576.11	38.2127		192.338	4.5734
			577.015	38.0859		192.64	4.58797
			577.919	38.1037		192.941	4.5488
			578.824	37.9898		193.243	4.59239
			579.728	38.1448		193.544	4.54855
			580.632	37.8933		193.846	4.55694
			581.537	38.0283		194.147	4.6019
			582.441	37.9546		194.449	4.53341
			583.346	38.1705		194.75	4.42665
			584.25	38.2704		195.052	4.34983
			585.154	38.0951		195.353	4.19169
			586.059	38.2893		195.655	4.3483
			586.963	38.3103		195.956	4.59127
			587.868	38.3802		196.257	4.75741
			588.772	38.0683		196.559	4.72941
			589.677	38.2257		196.86	4.64126
			590.581	38.0782		197.162	4.63915
			591.485	37.9367		197.463	4.71356
			592.39	37.9656		197.765	4.69034
			593.294	37.9881		198.066	4.76899
			594.199	38.029		198.368	5.11018
			595.103	37.8532		198.669	4.89963
						198.971	4.46936
						199.272	4.53828
						199.574	4.67822
						199.875	4.69484
						200.177	4.70078
						200.478	4.60601
						200.78	4.64585
						201.081	4.61722
						201.382	4.59407
						201.684	4.54125
						201.985	4.40055
						202.287	4.4085
						202.588	4.31728
						202.89	4.38439
						203.191	4.47338
						203.493	4.53749
						203.794	4.56334
						204.096	4.67817
						204.397	4.58689
						204.699	4.60097
						205	4.4603
						205.302	4.40787
						205.603	4.45373
						205.905	4.60582
						206.206	4.45538
						206.507	4.65386
						206.809	4.73878
						207.11	4.777
						207.412	4.70517
						207.713	4.57764
						208.015	4.57131
						208.316	4.55374
						208.618	4.46889
						208.919	4.47449
						209.221	4.63195
						209.522	4.54881
						209.824	4.58659
						210.125	4.54636
						210.427	4.55115
						210.728	4.57466
						211.03	4.54295
						211.331	4.57125
						211.632	4.57323
						211.934	4.64953
						212.235	4.59833
						212.537	4.61124
						212.838	4.5348
						213.14	4.49204
						213.441	4.53785
						213.743	4.62493
						214.044	4.59322
						214.346	4.63529
						214.647	4.53616
						214.949	4.55366
						215.25	4.64695
						215.552	4.58318
						215.853	4.60079
						216.155	4.54119
						216.456	4.45281
						216.757	4.42021
						217.059	4.52254
						217.36	4.50643
						217.662	4.64369
						217.963	4.56682
						218.265	4.49961
						218.566	4.57133
						218.868	4.53455
						219.169	4.48952
						219.471	4.45309
						219.772	4.47469
						220.074	4.48045
						220.375	4.53193
						220.677	5.07996
						220.978	4.76179
						221.28	4.3404
						221.581	4.36736
						221.882	4.51774
						222.184	4.59305
						222.485	4.64173
						222.787	4.62887
						223.088	4.71613
						223.39	4.58102
						223.691	4.51239
						223.993	4.5565
						224.294	4.55428
						224.596	4.55779
						224.897	4.54535
						225.199	4.58258
						225.5	4.48584
						225.802	4.50917
						226.103	4.48882
						226.405	4.50293
						226.706	4.41991
						227.007	4.56889
						227.309	4.56835
						227.61	4.43755
						227.912	4.36329
						228.213	4.52617
						228.515	4.51325
						228.816	4.58395
						229.118	4.64607
						229.419	4.67131
						229.721	4.71395
						230.022	5.26452
						230.324	4.66664
						230.625	4.76036
						230.927	4.8301
						231.228	4.78382
						231.53	4.60217
						231.831	4.77957
						232.133	4.63953
						232.434	4.5833
						232.735	4.62434
						233.037	4.62279
						233.338	4.57903
						233.64	4.68595
						233.941	4.78942
						234.243	4.72594
						234.544	4.88625
						234.846	4.80729
						235.147	4.76122
						235.449	4.82884
						235.75	4.77409
						236.052	4.80554
						236.353	4.69968
						236.655	4.62536
						236.956	4.66334
						237.257	4.53236
						237.559	4.63873
						237.86	4.55294
						238.162	4.58429
						238.463	4.57364
						238.765	4.5938
						239.066	4.63171
						239.368	4.56106
						239.669	4.66801
						239.971	4.58516
						240.272	4.51024
						240.574	4.68597
						240.875	4.64384
						241.177	4.62658
						241.478	4.53438
						241.78	4.62761
						242.081	4.62707
						242.383	4.4632
						242.684	4.57581
						242.985	4.63247
						243.287	4.72936
						243.588	4.72456
						243.89	4.68709
						244.191	4.73102
						244.493	4.6065
						244.794	4.54584
						245.096	4.60123
						245.397	4.55374
						245.699	4.70509
						246	4.5688
						246.302	4.60895
						246.603	4.58107
						246.905	4.55441
						247.206	4.45771
						247.507	4.57604
						247.809	4.62779
						248.11	4.55855
						248.412	4.53966
						248.713	4.62719
						249.015	4.62406
						249.316	4.52865
						249.618	4.57884
						249.919	4.58781
						250.221	4.62911
						250.522	4.67653
						250.824	4.6129
						251.125	4.7076
						251.427	4.77553
						251.728	4.63046
						252.03	4.62936
						252.331	4.70877
						252.633	4.62377
						252.934	4.59746
						253.235	4.60201
						253.537	4.60862
						253.838	4.60476
						254.14	4.58815
						254.441	4.58946
						254.743	4.66763
						255.044	4.60231
						255.346	4.56116
						255.647	4.54038
						255.949	4.5626
						256.25	4.57459
						256.552	4.53689
						256.853	4.64945
						257.155	4.62607
						257.456	4.63874
						257.758	4.55251
						258.059	4.57434
						258.36	4.5951
						258.662	4.54692
						258.963	4.58718
						259.265	4.53624
						259.566	4.59835
						259.868	4.60641
						260.169	4.60369
						260.471	4.60948
						260.772	4.70598
						261.074	4.67425
						261.375	4.5921
						261.677	4.59524
						261.978	4.56635
						262.28	4.52283
						262.581	4.40203
						262.882	4.55038
						263.184	4.63163
						263.485	4.64307
						263.787	4.53419
						264.088	4.56186
						264.39	4.50324
						264.691	4.43341
						264.993	4.42509
						265.294	4.46683
						265.596	4.48466
						265.897	4.59046
						266.199	4.53102
						266.5	4.58518
						266.802	4.5106
						267.103	4.57736
						267.405	4.61142
						267.706	4.5957
						268.007	4.55577
						268.309	4.56105
						268.61	4.61862
						268.912	4.66766
						269.213	4.5608
						269.515	4.6495
						269.816	4.62065
						270.118	4.63667
						270.419	4.6173
						270.721	4.65095
						271.022	4.53807
						271.324	4.32926
						271.625	4.29635
						271.927	4.08541
						272.228	4.01126
						272.53	4.16686
						272.831	6.0697
						273.132	4.29978
						273.434	4.41172
						273.735	4.46818
						274.037	4.38613
						274.338	4.46194
						274.64	4.46691
						274.941	4.49049
						275.243	4.45927
						275.544	4.48168
						275.846	4.38894
						276.147	4.48857
						276.449	5.2839
						276.75	5.17072
						277.052	4.49111
						277.353	4.26101
						277.655	4.3858
						277.956	4.52061
						278.257	4.59215
						278.559	4.55829
						278.86	4.59566
						279.162	4.42346
						279.463	4.43469
						279.765	4.54756
						280.066	4.51628
						280.368	4.64766
						280.669	4.57264
						280.971	4.62808
						281.272	4.61297
						281.574	4.63285
						281.875	4.63544
						282.177	4.61881
						282.478	4.57473
						282.78	4.54474
						283.081	4.49007
						283.383	4.62502
						283.684	4.67959
						283.985	4.65979
						284.287	4.68775
						284.588	4.57096
						284.89	4.55064
						285.191	4.65737
						285.493	4.63815
						285.794	4.53966
						286.096	4.52809
						286.397	4.56944
						286.699	4.64847
						287	4.59241
						287.302	4.63392
						287.603	4.55707
						287.905	4.62493
						288.206	4.5911
						288.508	4.66018
						288.809	4.68741
						289.11	4.86121
						289.412	5.1777
						289.713	4.47883
						290.015	4.41048
						290.316	4.42738
						290.618	4.42266
						290.919	4.48142
						291.221	4.60006
						291.522	4.63756
						291.824	4.67768
						292.125	4.69842
						292.427	4.75208
						292.728	4.59824
						293.03	4.57689
						293.331	4.54871
						293.633	4.47321
						293.934	4.42915
						294.235	4.40148
						294.537	4.46938
						294.838	4.51421
						295.14	4.47341
						295.441	4.53586
						295.743	4.44121
						296.044	4.3204
						296.346	4.46944
						296.647	4.32974
						296.949	4.29175
						297.25	4.395
						297.552	4.57443
						297.853	4.67701
						298.155	4.5296
						298.456	4.38464
						298.758	4.334
						299.059	4.15058
						299.36	4.24196
						299.662	4.30136
						299.963	4.54983
						300.265	4.90866
						300.566	5.0915
						300.868	5.13617
						301.169	5.31725
						301.471	5.24336
						301.772	5.06227
						302.074	5.00151
						302.375	4.8641
						302.677	4.6663
						302.978	4.45492
						303.28	4.36221
						303.581	4.32866
						303.883	4.39752
						304.184	4.62398
						304.485	4.80242
						304.787	4.72247
						305.088	4.67527
						305.39	4.6258
						305.691	4.52865
						305.993	4.2116
						306.294	4.39648
						306.596	4.42101
						306.897	4.49079
						307.199	4.55846
						307.5	4.59922
						307.802	4.7234
						308.103	4.60188
						308.405	4.64371
						308.706	4.5414
						309.007	4.62793
						309.309	4.62513
						309.61	4.59902
						309.912	4.65422
						310.213	4.6138
						310.515	4.56839
						310.816	4.60129
						311.118	4.63193
						311.419	4.5371
						311.721	4.53502
						312.022	4.60149
						312.324	4.56962
						312.625	4.52346
						312.927	4.49419
						313.228	4.50318
						313.53	4.60918
						313.831	4.57888
						314.133	4.66184
						314.434	4.58263
						314.735	4.45852
						315.037	4.32793
						315.338	4.34369
						315.64	4.36505
						315.941	4.36519
						316.243	4.44039
						316.544	4.4902
						316.846	4.52868
						317.147	4.55542
						317.449	4.6567
						317.75	4.55574
						318.052	4.47965
						318.353	4.55758
						318.655	4.52526
						318.956	4.49115
						319.258	4.4255
						319.559	4.4831
						319.86	4.56518
						320.162	4.74168
						320.463	4.96099
						320.765	4.95326
						321.066	4.49171
						321.368	4.1079
						321.669	4.15728
						321.971	4.44416
						322.272	4.50993
						322.574	4.53488
						322.875	4.40014
						323.177	4.48607
						323.478	4.36231
						323.78	4.37772
						324.081	4.39681
						324.383	4.38564
						324.684	4.2541
						324.985	4.62149
						325.287	4.7108
						325.588	4.67951
						325.89	4.77512
						326.191	4.68301
						326.493	4.60617
						326.794	4.65704
						327.096	4.50087
						327.397	4.56888
						327.699	4.48927
						328	4.52069
						328.302	4.49363
						328.603	4.55598
						328.905	4.88529
						329.206	5.41768
						329.508	4.52334
						329.809	4.50204
						330.11	4.55483
						330.412	4.55464
						330.713	4.51854
						331.015	4.43572
						331.316	4.39825
						331.618	4.34782
						331.919	4.46022
						332.221	4.45711
						332.522	4.42117
						332.824	4.48708
						333.125	4.65465
						333.427	4.71505
						333.728	4.60777
						334.03	4.63585
						334.331	4.56189
						334.633	4.50704
						334.934	4.61504
						335.235	4.51042
						335.537	4.52138
						335.838	4.50894
						336.14	4.54859
						336.441	4.44014
						336.743	4.40005
						337.044	4.43309
						337.346	4.41071
						337.647	4.34106
						337.949	4.52896
						338.25	4.59454
						338.552	4.56234
						338.853	4.56703
						339.155	4.45812
						339.456	4.57838
						339.758	4.50454
						340.059	4.45587
						340.361	4.52687
						340.662	4.51423
						340.963	4.54363
						341.265	4.45548
						341.566	4.52115
						341.868	4.45486
						342.169	4.49348
						342.471	4.65747
						342.772	4.60743
						343.074	4.52801
						343.375	4.50719
						343.677	4.45837
						343.978	4.48365
						344.28	4.48932
						344.581	4.52926
						344.883	4.49065
						345.184	4.52923
						345.485	4.42161
						345.787	4.36868
						346.088	4.30369
						346.39	4.36577
						346.691	4.29435
						346.993	4.37546
						347.294	4.49246
						347.596	4.69516
						347.897	4.73079
						348.199	4.79648
						348.5	4.59693
						348.802	4.64573
						349.103	4.66572
						349.405	4.61792
						349.706	4.66813
						350.008	4.69089
						350.309	4.7836
						350.61	4.72255
						350.912	4.65363
						351.213	4.53749
						351.515	4.46948
						351.816	4.41162
						352.118	4.31514
						352.419	4.39833
						352.721	4.49384
						353.022	4.48276
						353.324	4.61093
						353.625	4.73844
						353.927	5.16258
						354.228	4.51632
						354.53	4.64068
						354.831	4.48
						355.133	4.32864
						355.434	4.31305
						355.735	4.27235
						356.037	4.30162
						356.338	4.22916
						356.64	4.1518
						356.941	4.17272
						357.243	4.17971
						357.544	4.14729
						357.846	4.23156
						358.147	4.31443
						358.449	4.35799
						358.75	4.337
						359.052	4.40844
						359.353	4.39952
						359.655	4.4965
						359.956	4.50236
						360.258	4.56879
						360.559	4.56436
						360.86	4.62938
						361.162	4.64955
						361.463	4.61098
						361.765	4.54469
						362.066	4.54061
						362.368	4.52802
						362.669	4.53613
						362.971	4.55278
						363.272	4.52186
						363.574	4.60101
						363.875	4.56287
						364.177	4.63425
						364.478	4.59717
						364.78	4.5271
						365.081	4.5696
						365.383	4.53842
						365.684	4.54797
						365.985	4.49786
						366.287	4.40352
						366.588	4.44167
						366.89	4.50735
						367.191	4.56399
						367.493	4.56201
						367.794	4.5822
						368.096	4.59062
						368.397	4.72207
						368.699	4.65126
						369	4.58237
						369.302	4.49336
						369.603	4.51675
						369.905	4.42992
						370.206	4.47109
						370.508	4.53628
						370.809	4.54972
						371.11	4.4853
						371.412	4.54602
						371.713	4.58328
						372.015	4.61554
						372.316	4.61691
						372.618	4.52721
						372.919	4.58614
						373.221	4.49378
						373.522	4.50712
						373.824	4.49824
						374.125	4.56516
						374.427	4.68789
						374.728	4.79443
						375.03	4.85388
						375.331	4.76471
						375.633	4.35778
						375.934	4.20512
						376.236	4.26859
						376.537	4.32794
						376.838	4.3113
						377.14	4.34035
						377.441	4.41527
						377.743	4.45232
						378.044	4.54803
						378.346	4.48572
						378.647	4.33834
						378.949	4.278
						379.25	4.28232
						379.552	4.15014
						379.853	3.92047
						380.155	3.76205
						380.456	4.28671
						380.758	4.82951
						381.059	4.8706
						381.36	4.80483
						381.662	4.74163
						381.963	4.87152
						382.265	4.80602
						382.566	4.69866
						382.868	4.68152
						383.169	4.7404
						383.471	4.81723
						383.772	5.08114
						384.074	5.03811
						384.375	4.6594
						384.677	4.5276
						384.978	4.40724
						385.28	4.46529
						385.581	4.58105
						385.883	4.54215
						386.184	4.63763
						386.485	4.54438
						386.787	4.54145
						387.088	4.55547
						387.39	4.51807
						387.691	4.46047
						387.993	4.5516
						388.294	4.5404
						388.596	4.57996
						388.897	4.38992
						389.199	4.54074
						389.5	4.56533
						389.802	4.59665
						390.103	4.62185
						390.405	4.66536
						390.706	4.55319
						391.008	4.57989
						391.309	4.56264
						391.61	4.50696
						391.912	4.56929
						392.213	4.43547
						392.515	4.37799
						392.816	4.40817
						393.118	4.43379
						393.419	4.50401
						393.721	4.49927
						394.022	4.59727
						394.324	4.60559
						394.625	4.53211
						394.927	4.57501
						395.228	4.56191
						395.53	4.58901
						395.831	4.68703
						396.133	4.59447
						396.434	4.6679
						396.735	4.72308
						397.037	4.60263
						397.338	4.53374
						397.64	4.65226
						397.941	4.50451
						398.243	4.56134
						398.544	4.4717
						398.846	4.41063
						399.147	4.30453
						399.449	4.28468
						399.75	4.10906
						400.052	4.06711
						400.353	4.23023
						400.655	4.56662
						400.956	4.92819
						401.258	4.95867
						401.559	4.79666
						401.861	4.73168
						402.162	4.67395
						402.463	4.59126
						402.765	4.71493
						403.066	4.56139
						403.368	4.61067
						403.669	4.60752
						403.971	4.60257
						404.272	4.58081
						404.574	4.5856
						404.875	4.64778
						405.177	4.61687
						405.478	4.52847
						405.78	4.53667
						406.081	4.56897
						406.383	4.47159
						406.684	4.51643
						406.986	4.43862
						407.287	4.63235
						407.588	4.81943
						407.89	4.84302
						408.191	4.80359
						408.493	4.86538
						408.794	4.73837
						409.096	4.48771
						409.397	4.28468
						409.699	4.27789
						410	4.1956
						410.302	4.35761
						410.603	4.45205
						410.905	4.51186
						411.206	4.56255
						411.508	4.5573
						411.809	4.60201
						412.111	4.51874
						412.412	4.58339
						412.713	4.52351
						413.015	4.4622
						413.316	4.47005
						413.618	4.55938
						413.919	4.59197
						414.221	4.59272
						414.522	4.59063
						414.824	4.63981
						415.125	4.5779
						415.427	4.52577
						415.728	4.47539
						416.03	4.24866
						416.331	3.95016
						416.633	3.81435
						416.934	4.05561
						417.235	4.27315
						417.537	4.5231
						417.838	4.55192
						418.14	4.61709
						418.441	4.94547
						418.743	5.17283
						419.044	4.41899
						419.346	4.40235
						419.647	4.4243
						419.949	4.57192
						420.25	4.58316
						420.552	4.62399
						420.853	4.68151
						421.155	4.70015
						421.456	4.63321
						421.758	4.62012
						422.059	4.64868
						422.361	4.56048
						422.662	4.66195
						422.963	4.60871
						423.265	4.61588
						423.566	4.65292
						423.868	4.53368
						424.169	4.548
						424.471	4.54555
						424.772	4.40741
						425.074	4.48043
						425.375	4.79394
						425.677	4.75666
						425.978	4.67464
						426.28	4.53208
						426.581	4.55558
						426.883	4.54107
						427.184	4.46521
						427.486	4.40327
						427.787	4.43797
						428.088	4.44236
						428.39	4.44646
						428.691	4.53919
						428.993	4.45451
						429.294	4.51917
						429.596	4.54466
						429.897	4.50713
						430.199	4.51919
						430.5	4.5021
						430.802	4.53804
						431.103	4.50878
						431.405	4.53256
						431.706	4.5289
						432.008	4.39393
						432.309	4.43868
						432.611	4.30375
						432.912	4.23383
						433.213	4.18317
						433.515	4.20878
						433.816	4.25461
						434.118	4.2051
						434.419	4.26334
						434.721	4.29886
						435.022	4.31209
						435.324	4.42144
						435.625	4.43749
						435.927	4.44687
						436.228	4.47694
						436.53	4.61552
						436.831	4.58328
						437.133	4.69603
						437.434	4.62398
						437.735	4.67963
						438.037	4.52693
						438.338	4.48743
						438.64	4.40774
						438.941	4.46054
						439.243	4.61642
						439.544	4.72293
						439.846	6.43027
						440.147	4.3692
						440.449	4.26095
						440.75	4.35285
						441.052	4.3288
						441.353	4.20537
						441.655	4.1644
						441.956	4.35435
						442.258	4.34042
						442.559	4.30304
						442.861	4.26449
						443.162	4.31272
						443.463	4.31776
						443.765	4.25934
						444.066	4.34329
						444.368	4.41034
						444.669	4.38865
						444.971	4.41653
						445.272	4.44263
						445.574	4.44682
						445.875	4.48619
						446.177	4.40899
						446.478	4.43448
						446.78	4.39605
						447.081	4.58819
						447.383	4.54142
						447.684	4.55749
						447.986	4.55919
						448.287	4.54074
						448.588	4.4659
						448.89	4.31947
						449.191	4.43376
						449.493	4.47382
						449.794	4.44993
						450.096	4.52032
						450.397	4.44808
						450.699	4.45586
						451	4.45858
						451.302	4.48198
						451.603	4.53111
						451.905	4.5677
						452.206	4.52654
						452.508	4.49514
						452.809	4.49475
						453.111	4.52559
						453.412	4.57671
						453.713	4.54889
						454.015	4.61413
						454.316	4.42965
						454.618	4.48506
						454.919	4.49493
						455.221	4.53407
						455.522	4.60801
						455.824	4.6323
						456.125	4.60132
						456.427	4.54944
						456.728	4.3803
						457.03	4.56765
						457.331	4.59973
						457.633	4.60752
						457.934	4.53717
						458.236	4.41206
						458.537	4.38737
						458.838	4.30414
						459.14	4.22229
						459.441	4.09602
						459.743	4.23925
						460.044	4.4558
						460.346	4.66368
						460.647	4.88499
						460.949	5.09249
						461.25	5.09456
						461.552	4.81183
						461.853	4.60449
						462.155	4.43129
						462.456	4.38404
						462.758	4.51444
						463.059	4.60126
						463.361	4.64053
						463.662	4.52903
						463.963	4.5378
						464.265	4.49578
						464.566	4.51606
						464.868	4.62275
						465.169	4.5676
						465.471	4.64912
						465.772	4.74126
						466.074	4.91723
						466.375	5.27699
						466.677	6.54594
						466.978	7.93753
						467.28	6.23046
						467.581	4.33684
						467.883	3.92804
						468.184	3.90793
						468.486	3.95756
						468.787	3.95531
						469.088	4.11172
						469.39	4.23125
						469.691	4.28463
						469.993	4.33376
						470.294	4.44526
						470.596	4.45652
						470.897	4.56161
						471.199	4.49247
						471.5	4.53091
						471.802	4.57715
						472.103	4.41471
						472.405	4.54323
						472.706	4.54516
						473.008	4.37389
						473.309	4.39227
						473.611	4.41568
						473.912	4.27457
						474.213	4.52761
						474.515	4.49785
						474.816	4.44521
						475.118	4.4202
						475.419	4.46947
						475.721	4.40035
						476.022	4.52776
						476.324	4.59257
						476.625	4.70171
						476.927	4.76131
						477.228	4.61902
						477.53	4.30353
						477.831	4.14603
						478.133	4.15643
						478.434	4.22544
						478.736	5.65716
						479.037	5.07004
						479.338	4.54409
						479.64	4.62046
						479.941	4.69793
						480.243	4.58985
						480.544	4.5716
						480.846	4.46249
						481.147	4.21363
						481.449	4.05042
						481.75	4.11209
						482.052	4.13935
						482.353	4.11823
						482.655	4.13572
						482.956	4.15129
						483.258	4.2644
						483.559	4.36022
						483.861	4.45777
						484.162	4.58104
						484.463	4.59133
						484.765	4.54811
						485.066	4.56255
						485.368	4.59956
						485.669	4.60898
						485.971	4.58525
						486.272	4.56348
						486.574	4.5745
						486.875	4.54938
						487.177	4.52515
						487.478	4.44499
						487.78	4.46701
						488.081	4.42217
						488.383	4.47344
						488.684	4.70268
						488.986	4.75302
						489.287	4.45271
						489.589	4.55607
						489.89	4.52952
						490.191	4.39959
						490.493	4.27808
						490.794	4.31173
						491.096	4.28847
						491.397	4.3571
						491.699	4.42241
						492	4.57882
						492.302	4.90524
						492.603	5.24712
						492.905	5.19103
						493.206	4.81895
						493.508	4.52301
						493.809	4.19769
						494.111	3.87
						494.412	3.89754
						494.713	4.0364
						495.015	4.34903
						495.316	4.45059
						495.618	4.4671
						495.919	4.56985
						496.221	4.50598
						496.522	4.51264
						496.824	4.56519
						497.125	4.66702
						497.427	4.6671
						497.728	4.21997
						498.03	3.68465
						498.331	3.66915
						498.633	4.36186
						498.934	4.80534
						499.236	4.43519
						499.537	4.31517
						499.839	4.37336
						500.14	4.20532
						500.441	4.30744
						500.743	4.37442
						501.044	4.27134
						501.346	4.22253
						501.647	4.14987
						501.949	4.25807
						502.25	4.35073
						502.552	4.45845
						502.853	4.59648
						503.155	4.70469
						503.456	4.60518
						503.758	4.82697
						504.059	4.65081
						504.361	4.73811
						504.662	4.75582
						504.963	4.88308
						505.265	4.84324
						505.566	4.71235
						505.868	4.73711
						506.169	4.70429
						506.471	4.68816
						506.772	4.55826
						507.074	4.54887
						507.375	4.56007
						507.677	4.62301
						507.978	4.5565
						508.28	4.66981
						508.581	4.72686
						508.883	4.75696
						509.184	4.66531
						509.486	4.51693
						509.787	4.48938
						510.088	4.34051
						510.39	4.43035
						510.691	4.45084
						510.993	4.41764
						511.294	4.32215
						511.596	4.44483
						511.897	4.51665
						512.199	4.47867
						512.5	4.45509
						512.802	4.51679
						513.103	4.55254
						513.405	4.38973
						513.706	4.49134
						514.008	4.78269
						514.309	4.64309
						514.611	4.49595
						514.912	4.46831
						515.213	4.50879
						515.515	4.61594
						515.816	4.55231
						516.118	4.63468
						516.419	4.76393
						516.721	4.70183
						517.022	4.77247
						517.324	4.86579
						517.625	4.79763
						517.927	4.76416
						518.228	4.45321
						518.53	4.3224
						518.831	4.20282
						519.133	4.02162
						519.434	3.97087
						519.736	4.1551
						520.037	4.74696
						520.338	4.92364
						520.64	4.68956
						520.941	4.59712
						521.243	4.44043
						521.544	4.46613
						521.846	4.62519
						522.147	4.62433
						522.449	4.63992
						522.75	4.57308
						523.052	4.5203
						523.353	4.73883
						523.655	4.61061
						523.956	4.64219
						524.258	4.61405
						524.559	4.49801
						524.861	4.67728
						525.162	4.71272
						525.463	4.83454
						525.765	4.87846
						526.066	4.76927
						526.368	4.82186
						526.669	4.75091
						526.971	4.64585
						527.272	4.40827
						527.574	4.29464
						527.875	4.27907
						528.177	4.27589
						528.478	4.28438
						528.78	4.33757
						529.081	4.40559
						529.383	4.42611
						529.684	4.47089
						529.986	4.6454
						530.287	4.65221
						530.589	4.59276
						530.89	4.60902
						531.191	4.63694
						531.493	4.55673
						531.794	4.48548
						532.096	4.55285
						532.397	4.47825
						532.699	4.43691
						533	4.4361
						533.302	4.50588
						533.603	4.46415
						533.905	4.43304
						534.206	4.49545
						534.508	4.58328
						534.809	4.55607
						535.111	4.6018
						535.412	4.60472
						535.713	4.61738
						536.015	4.55759
						536.316	4.65855
						536.618	4.5514
						536.919	4.52476
						537.221	4.45537
						537.522	4.49504
						537.824	4.47851
						538.125	4.50639
						538.427	4.52775
						538.728	4.5682
						539.03	4.69926
						539.331	4.68988
						539.633	4.86966
						539.934	5.47277
						540.236	4.50081
						540.537	4.51515
						540.838	4.53811
						541.14	4.40942
						541.441	4.44353
						541.743	4.42512
						542.044	4.56687
						542.346	4.49903
						542.647	4.45467
						542.949	4.54012
						543.25	4.58191
						543.552	4.57163
						543.853	4.60098
						544.155	4.56773
						544.456	4.6229
						544.758	4.64303
						545.059	4.60808
						545.361	4.70059
						545.662	4.51707
						545.963	4.59283
						546.265	4.39294
						546.566	4.35091
						546.868	4.46823
						547.169	4.43146
						547.471	4.48466
						547.772	4.46161
						548.074	4.52356
						548.375	4.45242
						548.677	4.51678
						548.978	4.49284
						549.28	4.53913
						549.581	4.48341
						549.883	4.5454
						550.184	4.55723
						550.486	4.49131
						550.787	4.45596
						551.088	4.30809
						551.39	4.43357
						551.692	4.56132
						551.993	4.57516
						552.294	4.59457
						552.596	4.63082
						552.897	4.64563
						553.199	4.63665
						553.5	4.55078
						553.802	4.43805
						554.103	4.45589
						554.405	4.56035
						554.706	4.59748
						555.008	4.57889
						555.309	4.52749
						555.611	4.54325
						555.912	4.50147
						556.213	4.42106
						556.515	4.48995
						556.816	4.45053
						557.118	4.49219
						557.419	4.47088
						557.721	4.55171
						558.022	4.43626
						558.324	4.51413
						558.625	4.56795
						558.927	4.55549
						559.228	4.60807
						559.53	4.56301
						559.831	4.49526
						560.133	4.55915
						560.434	4.49758
						560.736	4.51591
						561.037	4.57666
						561.339	4.60093
						561.64	4.55529
						561.941	4.51467
						562.243	4.56157
						562.544	4.52491
						562.846	4.44497
						563.147	4.45119
						563.449	4.40255
						563.75	4.45569
						564.052	4.49127
						564.353	4.54523
						564.655	4.49065
						564.956	4.54122
						565.258	4.53013
						565.559	4.59635
						565.861	4.47573
						566.162	4.52475
						566.463	4.55653
						566.765	4.58882
						567.066	4.51056
						567.368	4.62358
						567.669	4.54781
						567.971	4.61016
						568.272	4.53643
						568.574	4.51082
						568.875	4.52424
						569.177	4.55805
						569.478	4.53148
						569.78	4.53003
						570.081	4.45257
						570.383	4.5599
						570.684	4.42583
						570.986	4.49438
						571.287	4.41984
						571.588	4.47279
						571.89	4.55644
						572.191	4.54261
						572.493	4.49793
						572.794	4.41404
						573.096	4.29435
						573.397	4.57664
						573.699	4.84975
						574	4.77717
						574.302	4.61006
						574.603	4.60525
						574.905	4.54501
						575.206	4.58687
						575.508	4.46711
						575.809	4.47451
						576.111	4.58824
						576.412	4.56576
						576.714	4.58727
						577.015	4.50634
						577.316	4.47976
						577.618	4.43024
						577.919	4.45717
						578.221	4.5068
						578.522	4.60098
						578.824	4.6462
						579.125	4.53586
						579.427	4.51861
						579.728	4.52657
						580.03	4.5922
						580.331	4.66366
						580.633	4.70686
						580.934	4.70186
						581.236	4.58981
						581.537	4.51964
						581.839	4.54421
						582.14	4.54563
						582.441	4.50225
						582.743	4.53513
						583.044	4.48738
						583.346	4.48646
						583.647	4.45606
						583.949	4.50094
						584.25	4.52386
						584.552	4.57933
						584.853	4.5368
						585.155	4.53474
						585.456	4.49623
						585.758	4.53404
						586.059	4.51612
						586.361	4.53704
						586.662	4.5336
						586.964	5.04245
						587.265	4.68466
						587.566	4.45889
						587.868	4.38542
						588.169	4.52826
						588.471	4.61703
						588.772	4.65805
						589.074	4.46118
						589.375	4.38236
						589.677	4.32378
						589.978	4.42612
						590.28	4.53872
						590.581	4.49222
						590.883	4.40597
						591.184	4.40319
						591.486	4.39147
						591.787	4.31133
						592.089	4.23232
						592.39	4.3189
						592.691	4.30342
						592.993	4.28378
						593.294	4.22692
						593.596	4.30011
						593.897	4.41512
						594.199	4.39288
						594.5	4.44242
						594.802	4.54922
						595.103	4.63113
						595.405	4.55513
						595.706	4.60535
						596.008	4.60885
						596.309	4.52224
						596.611	4.48954
						596.912	4.43534
						597.214	4.56217
						597.515	4.53363
						597.816	4.41732
						598.118	4.59839
						598.419	4.73724
						598.721	4.57632
						599.022	4.55815
						599.324	4.52651
						599.625	4.56995
						599.927	4.59512
						600.228	4.48254
						600.53	4.49909
						600.831	4.36556

## Sheet: Figure S7
Gauge 15	Length (mm)	Length (µm)	Gauge 27	Length (mm)	Length (µm)
(a)	0.518594	518.594	(b)	0.181373	181.373
	0.456451	456.451		0.171995	171.995
	0.502142	502.142		0.140804	140.804
	0.545109	545.109		0.145498	145.498
	0.513187	513.187		0.128028	128.028
	0.532842	532.842		0.133919	133.919
	0.534622	534.622		0.149429	149.429
	0.499921	499.921		0.16747	167.47
	0.494536	494.536		0.175292	175.292
	0.479942	479.942		0.170687	170.687
	0.427724	427.724		0.166041	166.041
	0.436387	436.387		0.171767	171.767
	0.465644	465.644		0.174702	174.702
	0.42176	421.76		0.193255	193.255
	0.416632	416.632		0.180469	180.469
	0.481476	481.476		0.175454	175.454
	0.492897	492.897		0.171747	171.747
	0.487805	487.805		0.169748	169.748
	0.502199	502.199		0.173066	173.066
	0.533776	533.776		0.195705	195.705
	0.508527	508.527		0.199127	199.127
	0.485332	485.332		0.208	208
	0.508484	508.484		0.20637	206.37
	0.511883	511.883		0.177333	177.333
	0.474704	474.704		0.184391	184.391
	0.488153	488.153		0.189451	189.451
	0.528771	528.771		0.192666	192.666
	0.503485	503.485		0.189901	189.901
	0.518922	518.922		0.180005	180.005
	0.522281	522.281		0.185353	185.353
	0.521589	521.589		0.164087	164.087
	0.527704	527.704		0.150955	150.955
	0.498379	498.379		0.148384	148.384
	0.498031	498.031		0.171602	171.602
	0.476345	476.345		0.171275	171.275
	0.52732	527.32		0.170108	170.108
	0.485213	485.213		0.135954	135.954
	0.474643	474.643		0.151426	151.426
	0.496752	496.752		0.151531	151.531
	0.439711	439.711		0.155034	155.034
	0.541849	541.849		0.140482	140.482
	0.501765	501.765		0.189634	189.634
	0.469654	469.654		0.192227	192.227
	0.469149	469.149		0.165355	165.355
	0.456712	456.712		0.142916	142.916
	0.428348	428.348		0.140254	140.254
	0.512939	512.939		0.169412	169.412
	0.414279	414.279		0.174116	174.116
	0.532021	532.021		0.172948	172.948
	0.513401	513.401		0.189957	189.957
	Average	491.6		Average	169.934
	error	34.4731		error	19.5641

## Sheet: Figure S8
5 mg/mL	Length (mm)	Length (µm)			10 mg/mL	Length (mm)	Length (µm)
(c)	0.0686165	68.6165	Average Pore size	58.015	(d)	0.0577623	57.7623	Average Pore size	41.1364
	0.0416879	41.6879	Standard Deviation	17.5511		0.0640361	64.0361	Standard Deviation	15.4716
	0.0545301	54.5301				0.0406071	40.6071
	0.0649826	64.9826				0.034897	34.897
	0.0626592	62.6592				0.0385128	38.5128
	0.0896599	89.6599				0.0547159	54.7159
	0.0768687	76.8687				0.0426363	42.6363
	0.0530706	53.0706				0.0457311	45.7311
	0.0491801	49.1801				0.0672885	67.2885
	0.0669643	66.9643				0.044843	44.843
	0.0321429	32.1429				0.0564453	56.4453
	0.0279508	27.9508				0.0355705	35.5705
	0.0260004	26.0004				0.03869	38.69
	0.049648	49.648				0.0423048	42.3048
	0.0410423	41.0423				0.0449505	44.9505
	0.0573239	57.3239				0.0365959	36.5959
	0.0404849	40.4849				0.0232839	23.2839
	0.0430057	43.0057				0.0244795	24.4795
	0.0435674	43.5674				0.0227067	22.7067
	0.0429315	42.9315				0.0206278	20.6278
	0.0359922	35.9922				0.0292822	29.2822
	0.0565962	56.5962				0.0300816	30.0816
	0.0644467	64.4467				0.0221508	22.1508
	0.0549597	54.9597				0.0152466	15.2466
	0.0502703	50.2703				0.0385128	38.5128
	0.0535714	53.5714				0.0329772	32.9772
	0.0676984	67.6984				0.0502002	50.2002
	0.0628878	62.8878				0.0497253	49.7253
	0.0524055	52.4055				0.0510187	51.0187
	0.0653313	65.3313				0.0235415	23.5415
	0.0298006	29.8006				0.0511525	51.1525
	0.036158	36.158				0.0501361	50.1361
	0.0540529	54.0529				0.015273	15.273
	0.062201	62.201				0.015663	15.663
	0.0889702	88.9702				0.0321997	32.1997
	0.0633225	63.3225				0.0425419	42.5419
	0.0656916	65.6916				0.0442744	44.2744
	0.062298	62.298				0.0480721	48.0721
	0.0541841	54.1841				0.0330868	33.0868
	0.0498464	49.8464				0.0253195	25.3195
	0.066064	66.064				0.0163662	16.3662
	0.115389	115.389				0.0260244	26.0244
	0.0579916	57.9916				0.0345029	34.5029
	0.0383139	38.3139				0.0380717	38.0717
	0.0412654	41.2654				0.0260707	26.0707
	0.0431985	43.1985				0.0269208	26.9208
	0.0803229	80.3229				0.0249837	24.9837
	0.025885	25.885				0.0292822	29.2822
	0.0429183	42.9183				0.0409032	40.9032
	0.0456783	45.6783				0.0204516	20.4516
	0.108368	108.368				0.0178022	17.8022
	0.086248	86.248				0.0269058	26.9058
	0.039726	39.726				0.0206473	20.6473
	0.0311974	31.1974				0.0181601	18.1601
	0.0385233	38.5233				0.0468468	46.8468
	0.0455637	45.5637				0.07145	71.45
	0.0585232	58.5232				0.0442268	44.2268
	0.0689184	68.9184				0.0711712	71.1712
	0.0689184	68.9184				0.0369369	36.9369
	0.0644368	64.4368				0.0535108	53.5108
	0.0733126	73.3126				0.0454486	45.4486
	0.063087	63.087				0.0631659	63.1659
	0.0833695	83.3695				0.0684329	68.4329
	0.0821399	82.1399				0.0173057	17.3057
	0.043726	43.726				0.0482298	48.2298
	0.0535119	53.5119				0.0568782	56.8782
	0.0584682	58.4682				0.0358667	35.8667
	0.077463	77.463				0.0567639	56.7639
	0.091752	91.752				0.0659137	65.9137
	0.0667544	66.7544				0.0327561	32.7561
	0.0527626	52.7626				0.0329907	32.9907
	0.0605697	60.5697				0.0443734	44.3734
	0.0876633	87.6633				0.0350426	35.0426
	0.0427587	42.7587				0.0557759	55.7759
	0.0558652	55.8652				0.0487819	48.7819
	0.0406764	40.6764				0.0411762	41.1762
	0.0585713	58.5713				0.0538811	53.8811
	0.0782122	78.2122				0.0234407	23.4407
	0.0698055	69.8055				0.0740549	74.0549
	0.0781454	78.1454				0.0282889	28.2889
	0.053399	53.399				0.0462277	46.2277
	0.0619873	61.9873				0.0355028	35.5028
	0.0350235	35.0235				0.045153	45.153
	0.0437352	43.7352				0.0216966	21.6966
	0.041547	41.547				0.0314284	31.4284
	0.0514035	51.4035				0.048682	48.682
	0.0442472	44.2472				0.0395166	39.5166
	0.0459592	45.9592				0.0463767	46.3767
	0.0567579	56.7579				0.0495033	49.5033
	0.0602768	60.2768				0.0633929	63.3929
	0.0564453	56.4453				0.0628878	62.8878
	0.0816587	81.6587				0.0513917	51.3917
	0.0834274	83.4274				0.0241237	24.1237
	0.0480721	48.0721				0.0377648	37.7648
	0.0571322	57.1322				0.0677925	67.7925
	0.0885352	88.5352				0.0393769	39.3769
	0.0567225	56.7225				0.0674151	67.4151
	0.0433843	43.3843				0.0379018	37.9018
	0.0717993	71.7993				0.0618654	61.8654
	0.0709201	70.9201				0.0786982	78.6982

## Sheet: Figure S9
Baslines corrected	GO	Pos. [°2Th.]	Iobs [cts]	rGO	Pos. [°2Th.]	Iobs [cts]	GO-CNF	Pos. [°2Th.]	Iobs [cts]	rGO-CNF	Pos. [°2Th.]	Iobs [cts]
		7.0001	-1838.07		7.0301	727.541		7.0001	46.0757		7.0001	-40.7673
		7.1001	-1838.28		7.1001	575.25		7.1001	-16.4052		7.1001	9.6943
		7.2001	-2222.55		7.1701	805.958		7.2001	398.114		7.2001	-37.8442
		7.3001	-2201.34		7.2401	556.666		7.3001	299.633		7.3001	-22.3827
		7.4001	-1949.18		7.3101	487.374		7.4001	293.152		7.4001	-128.921
		7.5001	-1285.89		7.3801	605.083		7.5001	825.672		7.5001	-36.4596
		7.6001	-1491.49		7.4501	591.791		7.6001	775.191		7.6001	-44.998
		7.7001	-1012.72		7.5201	399.499		7.7001	1360.71		7.7001	82.3096
		7.8001	-199.179		7.5901	577.208		7.8001	1320.23		7.8001	-193.384
		7.9001	-628.056		7.6601	345.916		7.9001	1937.75		7.9001	-198.076
		8.0001	349.766		7.7301	593.624		8.0001	2134.27		8.0001	7.2317
		8.1001	202.268		7.8001	346.333		8.1001	2508.79		8.1001	-110.461
		8.2001	167.192		7.8701	342.041		8.2001	2860.31		8.2001	-170.153
		8.3001	-16.5641		7.9401	301.749		8.3001	2861.31		8.3001	-289.845
		8.4001	349.922		8.0101	202.999		8.4001	2671.31		8.4001	4.4625
		8.5001	112.659		8.0801	118.249		8.5001	2163.31		8.5001	-32.2298
		8.6001	444.606		8.1501	194.499		8.6001	2147.31		8.6001	29.0779
		8.7001	1075.53		8.2201	37.7492		8.7001	2082.31		8.7001	64.3856
		8.8001	1346.67		8.2901	127.999		8.8001	2251.31		8.8001	-167.307
		8.9001	1862.04		8.3601	77.2492		8.9001	2297.31		8.9001	18.001
		9.0001	2516.73		8.4301	-44.5008		9.0001	2239.31		9.0001	-13.3836
		9.1001	2601.95		8.5001	52.7492		9.1001	2461.31		9.1001	-18.7683
		9.2001	3690.77		8.5701	-57.0008		9.2001	2420.31		9.2001	29.8471
		9.3001	4836.13		8.6401	53.2492		9.3001	2995.31		9.3001	-199.537
		9.4001	6286.7		8.7101	128.499		9.4001	3091.31		9.4001	-39.9221
		9.5001	7172.84		8.7801	7.7491		9.5001	3383.31		9.5001	-221.307
		9.6001	9504.94		8.8501	-58.0009		9.6001	4149.31		9.6001	-80.6913
		9.7001	11650.2		8.9201	-35.7509		9.7001	4295.31		9.7001	1.9241
		9.8001	13984.9		8.9901	23.4991		9.8001	5325.31		9.8001	-112.461
		9.9001	17700.6		9.0601	-112.251		9.9001	5526.31		9.9001	-0.8452
		10.0001	21911.9		9.1301	47.9991		10.0001	6392.31		10.0001	-128.23
		10.1001	27057.8		9.2001	-17.7509		10.1001	7378.31		10.1001	16.3856
		10.2001	35615.6		9.2701	-21.501		10.2001	8462.31		10.2001	19.001
		10.3001	45923.2		9.3401	121.749		10.3001	9605.31		10.3001	17.5394
		10.4001	59844.4		9.4101	-87.001		10.4001	10528.3		10.4001	-98.9221
		10.5001	77109.4		9.4801	52.9514		10.5001	11645.3		10.5001	74.6164
		10.6001	95638.3		9.5501	-135.096		10.6001	11855.3		10.6001	123.155
		10.7001	109971		9.6201	-42.1438		10.7001	12336.3		10.7001	156.693
		10.8001	115740		9.6901	-122.192		10.8001	11535.3		10.8001	58.2317
		10.9001	109220		9.7601	-57.2391		10.9001	10540.3		10.9001	-233.23
		11.0001	90073.2		9.8301	64.7133		11.0001	9149.31		11.0001	81.3087
		11.1001	67406.5		9.9001	-11.3343		11.1001	7283.31		11.1001	-12.1529
		11.2001	46299.1		9.9701	-128.382		11.2001	5866.31		11.2001	75.3856
		11.3001	32099.5		10.0401	-226.429		11.3001	4251.31		11.3001	244.924
		11.4001	23364.1		10.1101	-151.477		11.4001	3622.31		11.4001	-63.5375
		11.5001	17629.7		10.1801	-49.5248		11.5001	2680.79		11.5001	25.001
		11.6001	13066.4		10.2501	-260.572		11.6001	2118.27		11.6001	-77.3067
		11.7001	10391.2		10.3201	-205.62		11.7001	1748.75		11.7001	-95.6144
		11.8001	8218.94		10.3901	24.3324		11.8001	1223.23		11.8001	19.0779
		11.9001	6043.28		10.4601	-195.715		11.9001	1120.71		11.9001	46.7702
		12.0001	4815.21		10.5301	-91.7629		12.0001	745.191		12.0001	76.4625
		12.1001	3494.63		10.6001	-220.81		12.1001	763.672		12.1001	70.1548
		12.2001	2605.36		10.6701	-69.8581		12.2001	432.152		12.2001	88.8471
		12.3001	1960.49		10.7401	70.0943		12.3001	323.633		12.3001	118.539
		12.4001	1439.42		10.8101	22.0466		12.4001	339.114		12.4001	-27.7683
		12.5001	732.166		10.8801	-98.001		12.5001	21.5948		12.5001	-114.076
		12.6001	463.264		10.9501	-10.7153		12.6001	56.0757		12.6001	34.6164
		12.7001	5.5616		11.0201	-170.429		12.7001	-9.4435		12.7001	21.3087
		12.8001	52.0426		11.0901	-30.1438		12.8001	90.0374		12.8001	-41.999
		12.9001	-586.855		11.1601	-260.858		12.9001	-80.4818		12.9001	4.9241
		13.0001	-640.646		11.2301	-95.5724		13.0001	21.999		13.0001	35.8471
		13.1001	-726.091		11.3001	-161.287		13.1001	-60.3872		13.1001	68.7702
		13.2001	-592.282		11.3701	-364.001		13.2001	-45.7739		13.2001	149.693
		13.3001	-603.131		11.4401	-177.715		13.3001	-18.1606		13.3001	55.6164
		13.4001	-398.898		11.5101	-296.43		13.4001	-223.547		13.4001	-106.461
		13.5001	-632.469		11.5801	-467.144		13.5001	-106.934		13.5001	60.4625
		13.6001	-767.955		11.6501	-533.858		13.6001	-224.321		13.6001	59.3856
		13.7001	-412.314		11.7201	-364.572		13.7001	-96.7075		13.7001	253.309
		13.8001	-489.304		11.7901	-347.287		13.8001	-80.0942		13.8001	60.2313
		13.9001	70.5639		11.8601	-442.001		13.9001	-28.481		13.9001	22.1543
		14.0001	25.2422		11.9301	-302.715		14.0001	-96.8677		14.0001	57.0774
		14.1001	-233.94		12.0001	-379.43		14.1001	-147.254		14.1001	-124.999
		14.2001	-209.065		12.0701	-76.1438		14.2001	-26.6411		14.2001	52.1928
		14.3001	-350.192		12.1401	81.1419		14.3001	-96.0278		14.3001	44.3851
		14.4001	-520.548		12.2101	609.428		14.4001	146.585		14.4001	-40.4226
		14.5001	-153.259		12.2801	1457.71		14.5001	-0.8013		14.5001	44.7697
		14.6001	-519.316		12.3501	1589		14.6001	0.812		14.6001	-31.038
		14.7001	-270.074		12.4201	1625.89		14.7001	231.425		14.7001	-82.8457
		14.8001	-344.615		12.4901	959.776		14.8001	127.039		14.8001	10.3466
		14.9001	-416.455		12.5601	172.664		14.9001	223.652		14.9001	-78.4611
		15.0001	-209.63		12.6301	35.5526		15.0001	35.2651		15.0001	-54.2687
		15.1001	-363.296		12.7001	-218.559		15.1001	200.878		15.1001	146.924
		15.2001	-197.056		12.7701	-158.671		15.2001	49.4917		15.2001	-36.8841
		15.3001	-4.9839		12.8401	-398.782		15.3001	207.105		15.3001	7.3082
		15.4001	-179.904		12.9101	-232.894		15.4001	304.718		15.4001	63.5005
		15.5001	-45.8398		12.9801	-300.005		15.5001	225.332		15.5001	79.6928
		15.6001	104.497		13.0501	-240.117		15.6001	111.945		15.6001	-167.115
		15.7001	-130.506		13.1201	-290.229		15.7001	215.558		15.7001	11.0774
		15.8001	-49.1309		13.1901	-153.34		15.8001	290.171		15.8001	-63.7303
		15.9001	-19.7044		13.2601	-209.452		15.9001	165.785		15.9001	-74.538
		16.0001	46.5462		13.3301	-170.564		16.0001	190.398		16.0001	-28.3457
		16.1001	315.688		13.4001	-149.675		16.1001	373.011		16.1001	-40.1534
		16.2001	-223.644		13.4701	-170.787		16.2001	115.624		16.2001	11.0389
		16.3001	-148.163		13.5401	33.1017		16.3001	382.398		16.3001	-65.7687
		16.4001	-240.242		13.6101	-36.0099		16.4001	339.171		16.4001	-35.5764
		16.5001	-312.493		13.6801	51.8785		16.5001	291.945		16.5001	92.6159
		16.6001	-76.9694		13.7501	230.767		16.6001	229.718		16.6001	-89.1918
		16.7001	-388.574		13.8201	244.655		16.7001	5.4917		16.7001	118.001
		16.8001	-209.681		13.8901	309.474		16.8001	272.265		16.8001	-193.923
		16.9001	36.3216		13.9601	370.294		16.9001	42.0386		16.9001	102.154
		17.0001	96.668		14.0301	281.113		17.0001	256.812		17.0001	84.2313
		17.1001	-60.6826		14.1001	457.932		17.1001	76.5854		17.1001	-28.6918
		17.2001	-166.902		14.1701	466.751		17.2001	260.359		17.2001	46.3851
		17.3001	101.193		14.2401	569.571		17.3001	3.1323		17.3001	-54.538
		17.4001	-112.666		14.3101	621.39		17.4001	14.9058		17.4001	100.539
		17.5001	-250.846		14.3801	650.209		17.5001	200.679		17.5001	52.6159
		17.6001	-534.426		14.4501	768.028		17.6001	-77.5474		17.6001	-32.3072
		17.7001	-279.114		14.5201	968.847		17.7001	132.226		17.7001	27.7697
		17.8001	-243.093		14.5901	1004.66		17.8001	-160		17.8001	71.8466
		17.9001	-326.454		14.6601	1085.48		17.9001	105.482		17.9001	-103.076
		18.0001	-588.137		14.7301	1050.3		18.0001	-79.0358		18.0001	77.0005
		18.1001	43.9861		14.8001	998.124		18.1001	27.4465		18.1001	17.8466
		18.2001	-63.8918		14.8701	1248.94		18.2001	11.9289		18.2001	-146.307
		18.3001	37.9237		14.9401	1053.76		18.3001	-149.589		18.3001	-8.4611
		18.4001	-68.296		15.0101	1201.58		18.4001	-27.1064		18.4001	-135.615
		18.5001	-49.3984		15.0801	1284.4		18.5001	-178.624		18.5001	-50.7687
		18.6001	149.308		15.1501	1239.22		18.6001	-41.1417		18.6001	46.0774
		18.7001	-22.604		15.2201	1349.04		18.7001	81.3406		18.7001	-168.076
		18.8001	119.587		15.2901	1442.86		18.8001	82.823		18.8001	40.7697
		18.9001	-21.462		15.3601	1674.66		18.9001	172.305		18.9001	0.6159
		19.0001	87.8112		15.4301	1406.47		19.0001	71.7877		19.0001	-10.538
		19.1001	45.4672		15.5001	1738.28		19.1001	338.27		19.1001	-81.6918
		19.2001	-59.3436		15.5701	1391.08		19.2001	63.7523		19.2001	164.154
		19.3001	56.7284		15.6401	1497.89		19.3001	262.235		19.3001	-17.9995
		19.4001	82.0523		15.7101	1812.7		19.4001	50.717		19.4001	-70.1666
		19.5001	13.0326		15.7801	1775.5		19.5001	234.533		19.5001	-34.3336
		19.6001	106.901		15.8501	1739.31		19.6001	325.349		19.6001	-21.5007
		19.7001	-9.5578		15.9201	1667.12		19.7001	346.165		19.7001	5.3323
		19.8001	-157.371		15.9901	1805.92		19.8001	336.981		19.8001	59.1652
		19.9001	49.053		16.0601	1860.73		19.9001	286.797		19.9001	96.9981
		20.0001	42.5605		16.1301	1732.54		20.0001	366.613		20.0001	91.8311
		20.1001	-38.5755		16.2001	1767.34		20.1001	505.429		20.1001	44.664
		20.2001	58.5132		16.2701	1757.15		20.2001	587.245		20.2001	-15.503
		20.3001	-125.018		16.3401	1870.96		20.3001	635.061		20.3001	244.33
		20.4001	-66.4454		16.4101	1693.76		20.4001	545.877		20.4001	74.1628
		20.5001	281.786		16.4801	1784.57		20.5001	732.693		20.5001	139.996
		20.6001	-77.7691		16.5501	1914.38		20.6001	572.509		20.6001	346.829
		20.7001	-4.8319		16.6201	1778.18		20.7001	920.325		20.7001	410.864
		20.8001	-93.0431		16.6901	1901.99		20.8001	996.141		20.8001	298.9
		20.9001	-34.5971		16.7601	1641.8		20.9001	968.957		20.9001	379.935
		21.0001	70.3597		16.8301	1684.34		21.0001	1153.77		21.0001	347.971
		21.1001	123.469		16.9001	1556.89		21.1001	1123.59		21.1001	314.006
		21.2001	200.903		16.9701	2011.44		21.2001	1150.4		21.2001	359.041
		21.3001	226.574		17.0401	1802.98		21.3001	1267.22		21.3001	343.077
		21.4001	-8.0603		17.1101	1766.53		21.4001	1499.04		21.4001	480.112
		21.5001	47.1836		17.1801	1788.08		21.5001	1616.85		21.5001	490.148
		21.6001	-81.1339		17.2501	1755.63		21.6001	1543.67		21.6001	477.183
		21.7001	-138.139		17.3201	1556.17		21.7001	1766.49		21.7001	489.219
		21.8001	214.954		17.3901	1894.72		21.8001	1574.3		21.8001	484.254
		21.9001	-152.087		17.4601	1695.27		21.9001	1952.12		21.9001	641.289
		22.0001	-172.206		17.5301	1849.82		22.0001	1896.93		22.0001	512.597
		22.1001	28.693		17.6001	1996.36		22.1001	2134.75		22.1001	682.905
		22.2001	-21.1899		17.6701	1935.91		22.2001	2066.57		22.2001	626.213
		22.3001	-36.4351		17.7401	1599.46		22.3001	2134.38		22.3001	874.521
		22.4001	14.5375		17.8101	1586		22.4001	2307.2		22.4001	819.829
		22.5001	-12.4342		17.8801	1606.55		22.5001	2193.01		22.5001	911.137
		22.6001	-225.68		17.9501	1487.1		22.6001	2300.83		22.6001	965.445
		22.7001	-250.304		18.0201	1662.64		22.7001	2186.98		22.7001	903.753
		22.8001	-40.6503		18.0901	1533.19		22.8001	2150.13		22.8001	1076.06
		22.9001	-82.2607		18.1601	1518.74		22.9001	1800.28		22.9001	1075.37
		23.0001	78.5537		18.2301	1392.29		23.0001	1808.43		23.0001	1219.68
		23.1001	-15.5166		18.3001	1296.88		23.1001	1642.58		23.1001	1224.98
		23.2001	-143.565		18.3701	1353.48		23.2001	1512.73		23.2001	1256.29
		23.3001	-64.8604		18.4401	1561.08		23.3001	1520.88		23.3001	1413.88
		23.4001	-189.198		18.5101	1321.67		23.4001	1314.03		23.4001	1524.46
		23.5001	-45.4424		18.5801	1189.27		23.5001	1246.18		23.5001	1615.04
		23.6001	135.756		18.6501	1140.87		23.6001	997.327		23.6001	1590.63
		23.7001	154.752		18.7201	1168.46		23.7001	929.477		23.7001	1604.21
		23.8001	178.224		18.7901	1055.06		23.8001	871.626		23.8001	1662.79
		23.9001	403.721		18.8601	1241.66		23.9001	605.776		23.9001	1747.38
		24.0001	863.975		18.9301	1158.26		24.0001	577.926		24.0001	1902.96
		24.1001	1321.22		19.0001	1008.85		24.1001	451.075		24.1001	1930.54
		24.2001	1250.79		19.0701	1043.45		24.2001	462.225		24.2001	2181.13
		24.3001	1614.95		19.1401	992.046		24.3001	310.024		24.3001	2081.71
		24.4001	1991.1		19.2101	779.644		24.4001	215.822		24.4001	2383.3
		24.5001	2461.41		19.2801	910.241		24.5001	283.62		24.5001	2380.88
		24.6001	3704.24		19.3501	881.838		24.6001	171.419		24.6001	2266.46
		24.7001	4819.1		19.4201	1004.43		24.7001	65.2171		24.7001	2472.05
		24.8001	5668.84		19.4901	443.031		24.8001	-95.9843		24.8001	2504.63
		24.9001	7278.64		19.5601	747.628		24.9001	149.814		24.9001	2666.21
		25.0001	8325.68		19.6301	553.225		25.0001	-28.3875		25.0001	2564.8
		25.1001	9262.44		19.7001	817.822		25.1001	121.411		25.1001	2764.38
		25.2001	9946.47		19.7701	645.374		25.2001	17.2094		25.2001	2668.96
		25.3001	10200.4		19.8401	584.926		25.3001	-126.992		25.3001	2633.55
		25.4001	9587.12		19.9101	715.478		25.4001	26.8062		25.4001	2686.13
		25.5001	9369.34		19.9801	729.03		25.5001	-131.395		25.5001	2698.71
		25.6001	7944.69		20.0501	690.582		25.6001	69.403		25.6001	2935.3
		25.7001	7198.21		20.1201	506.134		25.7001	-113.799		25.7001	2887.88
		25.8001	5914.55		20.1901	661.685		25.8001	63.9998		25.8001	2802.46
		25.9001	4994.02		20.2601	464.237		25.9001	-35.9377		25.9001	2868.32
		26.0001	4257.58		20.3301	426.789		26.0001	33.1248		26.0001	3052.18
		26.1001	3347.04		20.4001	378.341		26.1001	-53.8127		26.1001	2887.04
		26.2001	2873.6		20.4701	279.893		26.2001	-99.7502		26.2001	2872.9
		26.3001	2337.29		20.5401	497.445		26.3001	-72.6877		26.3001	2643.76
		26.4001	1606.06		20.6101	546.997		26.4001	-80.6252		26.4001	2549.62
		26.5001	1615.18		20.6801	599.549		26.5001	-81.5627		26.5001	2535.48
		26.6001	1312.16		20.7501	446.101		26.6001	-94.5002		26.6001	2632.34
		26.7001	871.548		20.8201	299.653		26.7001	-70.4377		26.7001	2323.2
		26.8001	945.276		20.8901	434.205		26.8001	97.6248		26.8001	2163.05
		26.9001	543.721		20.9601	348.757		26.9001	-58.3127		26.9001	2037.91
		27.0001	300.483		21.0301	510.309		27.0001	36.7498		27.0001	2032.77
		27.1001	494.688		21.1001	405.861		27.1001	-30.1877		27.1001	1783.63
		27.2001	292.184		21.1701	622.412		27.2001	-94.1252		27.2001	1799.77
		27.3001	199.713		21.2401	609.964		27.3001	20.9373		27.3001	1812.91
		27.4001	128.513		21.3101	640.516		27.4001	-30.0002		27.4001	1395.04
		27.5001	-96.4336		21.3801	688.068		27.5001	63.5935		27.5001	1407.18
		27.6001	14.9313		21.4501	817.62		27.6001	-41.8127		27.6001	1296.32
		27.7001	-145.214		21.5201	820.172		27.7001	69.781		27.7001	1199.46
		27.8001	-235.444		21.5901	832.724		27.8001	-37.6252		27.8001	997.595
		27.9001	-123.962		21.6601	869.276		27.9001	47.9685		27.9001	985.733
		28.0001	-311.627		21.7301	1126.83		28.0001	142.562		28.0001	900.87
		28.1001	-117.131		21.8001	965.38		28.1001	39.156		28.1001	735.008
		28.2001	-326.292		21.8701	998.932		28.2001	22.7498		28.2001	810.145
		28.3001	-108.566		21.9401	1043.48		28.3001	11.3435		28.3001	472.283
		28.4001	-151.353		22.0101	1498.04		28.4001	61.9373		28.4001	563.421
		28.5001	88.0173		22.0801	1406.59		28.5001	-34.469		28.5001	479.773
		28.6001	-47.9518		22.1501	1490.14		28.6001	48.1248		28.6001	410.125
		28.7001	-80.1836		22.2201	2029.69		28.7001	38.7185		28.7001	380.477
		28.8001	61.4157		22.2901	2153.24		28.8001	-18.6877		28.8001	215.83
		28.9001	0.2767		22.3601	2258.79		28.9001	118.906		28.9001	200.182
		29.0001	-41.4854		22.4301	2341.35		29.0001	-86.5002		29.0001	283.534
		29.1001	-57.6653		22.5001	2457.9		29.1001	44.0935		29.1001	118.887
		29.2001	84.1333		22.5701	2514.45		29.2001	29.6873		29.2001	137.239
		29.3001	-85.6834		22.6401	2803		29.3001	85.281		29.3001	135.591
		29.4001	-178.629		22.7101	2976.51		29.4001	-21.1252		29.4001	1.9434
		29.5001	-181.849		22.7801	3260.02		29.5001	-55.5315		29.5001	0.2957
		29.6001	-136.596		22.8501	3349.52		29.6001	30.0623		29.6001	66.648
		29.7001	-77.078		22.9201	3206.03		29.7001	-59.344		29.7001	-77.9998
		29.8001	-25.5802		22.9901	3673.54		29.8001	96.2498		29.8001	55.3079
		29.9001	58.7203		23.0601	3523.04		29.9001	7.8435		29.9001	14.6156
		30.0001	38.8294		23.1301	3725.55		30.0001	-41.5627		30.0001	0.9233
		30.1001	-42.6044		23.2001	3846.06		30.1001	87.031		30.1001	56.231
		30.2001	-137.131		23.2701	3938.57		30.2001	-98.3752		30.2001	-5.4613
		30.3001	-142.143		23.3401	3901.07		30.3001	108.219		30.3001	72.8464
		30.4001	-48.365		23.4101	4201.58		30.4001	-194.188		30.4001	-31.8459
		30.5001	78.8799		23.4801	4421.09		30.5001	61.406		30.5001	-25.5382
		30.6001	-28.2715		23.5501	4636.59		30.6001	-47.0002		30.6001	-31.2305
		30.7001	105.546		23.6201	4514.1		30.7001	95.0623		30.7001	-10.9228
		30.8001	41.8592		23.6901	4846.61		30.8001	-27.8752		30.8001	-43.6153
		30.9001	29.7019		23.7601	5082.11		30.9001	-10.8127		30.9001	28.6924
		31.0001	-14.3441		23.8301	5039.62		31.0001	-22.7502		31.0001	-39.9999
		31.1001	207.343		23.9001	5659.13		31.1001	-31.6877		31.1001	11.077
		31.2001	11.566		23.9701	5925.64		31.2001	4.3748		31.2001	-0.846
		31.3001	15.5141		24.0401	6182.14		31.3001	-88.5627		31.3001	-44.7691
		31.4001	38.8412		24.1101	6396.65		31.4001	-70.5002		31.4001	32.3078
		31.5001	78.931		24.1801	6865.02		31.5001	64.5623		31.5001	-91.6153
		31.6001	129.733		24.2501	7601.38		31.6001	-91.3752		31.6001	8.4617
		31.7001	85.8869		24.3201	8284.75		31.7001	-8.3127		31.7001	-8.4614
		31.8001	190.345		24.3901	8746.12		31.8001	-19.2502		31.8001	-41.3845
		31.9001	18.1465		24.4601	9901.49		31.9001	66.8123		31.9001	-29.3076
		32.0001	86.7568		24.5301	10834.9		32.0001	1.8748		32.0001	-36.2306
		32.1001	-87.4895		24.6001	11626.2		32.1001	-27.0627		32.1001	20.8463
		32.2001	-203.98		24.6701	13014.6		32.2001	83.9998		32.2001	52.9232
		32.3001	-96.0074		24.7401	14761		32.3001	-107.904		32.3001	-35.9999
		32.4001	-62.9871		24.8101	16895.3		32.4001	69.1912		32.4001	-39.1537
		32.5001	222.851		24.8801	18873.7		32.5001	-82.7131		32.5001	18.6924
		32.6001	-160.944		24.9501	21167.1		32.6001	116.383		32.6001	-44.4614
		32.7001	20.9469		25.0201	22806.4		32.7001	-49.5217		32.7001	37.3847
		32.8001	-99.9635		25.0901	24806.8		32.8001	90.574		32.8001	3.2309
		32.9001	0.5725		25.1601	28095.2		32.9001	59.6697		32.9001	-53.923
		33.0001	15.084		25.2301	31273.5		33.0001	61.7654		33.0001	-30.0768
		33.1001	-13.7736		25.3001	35448.9		33.1001	28.8611		33.1001	-34.2306
		33.2001	-0.2709		25.3701	39569.3		33.2001	107.957		33.2001	85.6155
		33.3001	23.4535		25.4401	44820.6		33.3001	177.053		33.3001	-0.5383
		33.4001	-83.4744		25.5101	50488		33.4001	91.1482		33.4001	25.3078
		33.5001	128.731		25.5801	56108.4		33.5001	182.244		33.5001	29.154
		33.6001	-92.9262		25.6501	60946.1		33.6001	67.3396		33.6001	-31.9999
		33.7001	-8.3935		25.7201	66141.8		33.7001	134.435		33.7001	5.154
		33.8001	69.3473		25.7901	70668.6		33.8001	124.531		33.8001	7.3078
		33.9001	-83.9608		25.8601	73150.3		33.9001	154.627		33.9001	6.4617
		34.0001	-17.6478		25.9301	73885		34.0001	270.722		34.0001	125.615
		34.1001	-57.8035		26.0001	74098.7		34.1001	176.818		34.1001	41.7694
		34.2001	-15.3655		26.0701	72402.5		34.2001	226.914		34.2001	-12.0768
		34.3001	165.678		26.1401	68803.2		34.3001	117.01		34.3001	38.077
		34.4001	43.4803		26.2101	64592.9		34.4001	167.105		34.4001	32.2309
		34.5001	-4.7057		26.2801	59630.7		34.5001	371.201		34.5001	22.3847
		34.6001	100.716		26.3501	54425.4		34.6001	222.297		34.6001	133.539
		34.7001	-248.042		26.4201	49101.1		34.7001	424.392		34.7001	74.6924
		34.8001	23.3027		26.4901	43329.8		34.8001	316.488		34.8001	10.8463
		34.9001	1.7719		26.5601	38315.6		34.9001	335.584		34.9001	-26.9999
		35.0001	82.8535		26.6301	33855.3		35.0001	199.679		35.0001	-37.923
		35.1001	-38.5286		26.7001	29185		35.1001	209.775		35.1001	44.154
		35.2001	-85.8424		26.7701	25863.8		35.2001	271.871		35.2001	27.2309
		35.3001	-209.636		26.8401	22556.5		35.3001	217.967		35.3001	16.3078
		35.4001	85.8161		26.9101	19514.2		35.4001	311.062		35.4001	54.3847
		35.5001	0.3978		26.9801	17288		35.5001	89.4958		35.5001	45.4617
		35.6001	9.2998		27.0501	15234.7		35.6001	168.929		35.6001	11.5386
		35.7001	-212.395		27.1201	13294.9		35.7001	140.363		35.7001	39.6155
		35.8001	-75.0514		27.1901	11670.2		35.8001	82.7966		35.8001	-25.3076
		35.9001	6.5557		27.2601	10178.4		35.9001	188.23		35.9001	67.7694
		36.0001	-5.0511		27.3301	9071.63		36.0001	130.664		36.0001	28.8463
		36.1001	-145.977		27.4001	7939.86		36.1001	182.097		36.1001	-25.0768
		36.2001	-275.096		27.4701	6871.09		36.2001	129.531		36.2001	-13.9999
		36.3001	-138.759		27.5401	6348.32		36.3001	93.9646		36.3001	23.9232
		36.4001	57.848		27.6101	5344.56		36.4001	124.398		36.4001	-19.1537
		36.5001	85.5586		27.6801	4769.79		36.5001	58.8318		36.5001	-12.2306
		36.6001	-86.5339		27.7501	4128.02		36.6001	81.2654		36.6001	-3.3076
		36.7001	-15.2982		27.8201	3533.25		36.7001	57.699		36.7001	-41.3845
		36.8001	43.7109		27.8901	3187.49		36.8001	75.1326		36.8001	37.5386
		36.9001	21.2474		27.9601	2722.72		36.9001	-50.4338		36.9001	-55.5383
		37.0001	78.1603		28.0301	2344.95		37.0001	34.9998		37.0001	47.3847
		37.1001	70.311		28.1001	2128.18		37.1001	-0.5627		37.1001	-36.6922
		37.2001	14.1712		28.1701	1896.41		37.2001	-30.1252		37.2001	-31.7691
		37.3001	16.4377		28.2401	1523.65		37.3001	95.3123		37.3001	20.154
		37.4001	-175.076		28.3101	1287.88		37.4001	57.7498		37.4001	-19.923
		37.5001	-79.634		28.3801	1138.11		37.5001	107.187		37.5001	3.0001
		37.6001	61.007		28.4501	973.343		37.6001	12.6248		37.6001	32.3847
		37.7001	-180.061		28.5201	649.575		37.7001	95.0623		37.7001	-54.2306
		37.8001	-161.151		28.5901	520.31		37.8001	7.4998		37.8001	0.154
		37.9001	59.7091		28.6601	452.044		37.9001	41.9373		37.9001	-44.4614
		38.0001	74.0972		28.7301	300.779		38.0001	67.3748		38.0001	28.9232
		38.1001	-34.4645		28.8001	363.513		38.1001	36.8123		38.1001	15.3078
		38.2001	-106.759		28.8701	327.248		38.2001	39.2498		38.2001	8.6924
[truncated: 730 more rows]

[truncated: 6 more sheets: Figure S10, Figure S11, Figure S12, Figure S13, Figure S14, Figure S15]
